# Supplementary material
Source: MDPI journal article supplement (https://www.mdpi.com/search?q=genes-02-01050)
Supplement: s001 [file NCPPB1131-RAST.xls]

## Sheet: Sheet1
contig_id	feature_id	type	location	start	stop	strand	function	aliases	figfam	evidence_codes	nucleotide_sequence	aa_sequence
gi|348020311|gb|AGHY01003221.1|	fig|487527.6.peg.1	peg	gi|348020311|gb|AGHY01003221.1|_36_458	36	458	+	Transglutaminase-like enzymes, putative cysteine proteases				gtgctgcacaccgccgacggcaccctggcgcgcacgccgccggacgacgccaagcgcaaccgctacctggtcgagaccgactatcgcttcgccgccgacggcagcctgagcggcatcacccgcctggacagcggcgatgtcggcgaggtcggcctgcgcacgatgttcgtgcagctcaacgcgcagaaccgcacccgcatcgaggaatcgatcctcgccgcctccggcttcgacggcagcggcgagttgctgctgcagggcgcgccgcaggatctgcgcccggccgttcggctacgcctaccgcttccgcgcgcacgactacgtggacttcggcgtggtcggcggcatgagcctgccgctgatgcccggcgccgattcggtgcgcggggtctacagcac…	MLHTADGTLARTPPDDAKRNRYLVETDYRFAADGSLSGITRLDSGDVGEVGLRTMFVQLNAQNRTRIEESILAASGFDGSGELLLQGAPQDLRPAVRLRLPLPRARLRGLRRGRRHEPAADARRRFGARGLQHRLGRAAI
gi|348020313|gb|AGHY01003220.1|	fig|487527.6.peg.2	peg	gi|348020313|gb|AGHY01003220.1|_172_44	172	44	-	hypothetical protein				gtgcccggccagggcatcgcgcagacctggaacgccggcatgagcgaaggcaaccccgccggcgaactgctggccggcgcggccacgctgcgcttctccatcgactaccaacgcctctacgcgccttga	MPGQGIAQTWNAGMSEGNPAGELLAGAATLRFSIDYQRLYAP
gi|348020319|gb|AGHY01003217.1|	fig|487527.6.peg.3	peg	gi|348020319|gb|AGHY01003217.1|_425_285	425	285	-	hypothetical protein				gtgctgggcggctcgatcgcgaccttcatgaccgcgacccatcgccggggtgctgtcgcacttcgcctgatccggccgcagcatccgttacaccgttttcctttttttcagttccagtcgagaagcagtacatgcctatga	MLGGSIATFMTATHRRGAVALRLIRPQHPLHRFPFFQFQSRSSTCL
gi|348020321|gb|AGHY01003216.1|	fig|487527.6.peg.4	peg	gi|348020321|gb|AGHY01003216.1|_202_47	202	47	-	5-methyltetrahydropteroyltriglutamate--homocysteine methyltransferase (EC 2.1.1.14)		FIG00000683	idu(1);Methionine_Biosynthesis	atggcgctgccggtggatggcgtgcacgtggacctggtgcgcggcgtggcgcaactggacgcggtgctgcaggccctgccggccgggcgcgttcctctcggcgggcctggtcaacggcccgcaacgtgtggcgcacgccgctggacaacgcgctga	MALPVDGVHVDLVRGVAQLDAVLQALPAGRVPLGGPGQRPATCGARRWTTR
gi|348020355|gb|AGHY01003199.1|	fig|487527.6.peg.5	peg	gi|348020355|gb|AGHY01003199.1|_204_85	204	85	-	hypothetical protein				ttgggcgagcaggcgcaacaggtggtgcgcgaggtcgacgtggaggcgatcgaacagttgctgatcgaacgcctgaccgcgccgcagccgccggcgctgggcgcgccgttgccgggctga	MGEQAQQVVREVDVEAIEQLLIERLTAPQPPALGAPLPG
gi|348020377|gb|AGHY01003188.1|	fig|487527.6.peg.6	peg	gi|348020377|gb|AGHY01003188.1|_391_59	391	59	-	6-phospho-beta-glucosidase				gtgaccgcatcaccccactgccggcacggccgatgcccgaggcgatccagggcctggtgcgccacggtcaaggcctacgaacacgccgccatcgacgccgcgctcagcggcagccacctggaggcctgcaaggcgatgctgatccacccggccatcggcgagtggagcccatcgcggcggctgctggaggccttgttcggccatgccggcaagcggcgacgacgacggcgagtgcgtgtgctcgggaccgatgcactggcatggcgcgcaccaccaccactgagccggcaacgtgtgcggtcgcaggatgcatcggacggccacacgttgtaa	MTASPHCRHGRCPRRSRAWCATVKAYEHAAIDAALSGSHLEACKAMLIHPAIGEWSPSRRLLEALFGHAGKRRRRRRVRVLGTDALAWRAPPPLSRQRVRSQDASDGHTL
gi|348020379|gb|AGHY01003187.1|	fig|487527.6.peg.7	peg	gi|348020379|gb|AGHY01003187.1|_24_143	24	143	+	hypothetical protein				atgcgctggcctacaacgaactggctgcggcgctttgcgctgcagagcgggatgccggtgcgcctgtacggcgtccggtggttgcccgacgctcggcctgcaggcctggcaggcgagtaa	MRWPTTNWLRRFALQSGMPVRLYGVRWLPDARPAGLAGE
gi|348020389|gb|AGHY01003182.1|	fig|487527.6.peg.8	peg	gi|348020389|gb|AGHY01003182.1|_11_487	11	487	+	Peptidase B (EC 3.4.11.23)		FIG00001201	isu;Aminopeptidases_(EC_3.4.11.-)	gtggagatcgacaacaccgacgccgaaggccgcctggtgctgtgcgatgcgctggcctatgccggcgagcagcgacccgacgcgatcctggatttcgccaccttgaccggcgcggcgcgcatcgccctgggtccggacctgccggcgctgttcagcaacgacgacacgctggcgcaggcctggattcgccgccggcgagcgcactcgcgacccggtctggcgcatgccgctgtggcgcccgtacctgcgctacctgaccagctcggtcgccgacctggccaaccgccggctcgcgcatggccggcgcggtcaccgccgccctgtatctggagcgtttcgtgccggcgcggcaggcctgggcgcacctggacgtgtacgcctgggaacgacagcgaccgc…	MEIDNTDAEGRLVLCDALAYAGEQRPDAILDFATLTGAARIALGPDLPALFSNDDTLAQAWIRRRRAHSRPGLAHAAVAPVPALPDQLGRRPGQPPARAWPARSPPPCIWSVSCRRGRPGRTWTCTPGNDSDRPGRPAGGEALALRSAYAMLKARYAG
gi|348020404|gb|AGHY01003175.1|	fig|487527.6.peg.9	peg	gi|348020404|gb|AGHY01003175.1|_65_211	65	211	+	hypothetical protein				ttgccgcgcagggcgcctgggtggccgggcaatccggcgacggctgctacgaccccgccgccggcgcgcaactggatcctgcagggccatcccggcggcgatccggcgcaactggcccaggccttgaccgcgcggtggagcggctga	MPRRAPGWPGNPATAATTPPPARNWILQGHPGGDPAQLAQALTARWSG
gi|348020410|gb|AGHY01003172.1|	fig|487527.6.peg.10	peg	gi|348020410|gb|AGHY01003172.1|_53_205	53	205	+	hypothetical protein				atgcgctggacgtgcagcgccagcaggcctcggcccaggacaagcgcgctgcaggcgcatacccaggtgctgctgcgctacgtcgcgttgcagaagagcctgggcctgggctgggcggcaccggaggcaccggcgccgaccacgacgcagtag	MRWTCSASRPRPRTSALQAHTQVLLRYVALQKSLGLGWAAPEAPAPTTTQ
gi|348020414|gb|AGHY01003170.1|	fig|487527.6.peg.11	peg	gi|348020414|gb|AGHY01003170.1|_491_3	491	3	-	hypothetical protein				gtgctcaagccggaattctcgcgcttcggcgtgcatgtgcgtctgtacccggacggtgtacccgccgacgccgcgccgcttcccgcgcagggcgactgggtcgcgcagcgctactgtgcgggcgaggagcgctgctcgtacgcgctggcgcgcgacggtgtgttgctggcgcatgcggtgtaccgccccgcgctaccgcctgcggcgcagttccagctattacttcgacgcggcgccggatccgcagatcgagcgcttcaccgcgcagctggtgcaggcgctgcgcttcaccgggcagatctccttcgactggatggtgtcttcggaagggcgctgcagcgtgatcgaatgcaatccgcgcgcgaccagcggccctgcacctgttcgccgcagccgatc…	MLKPEFSRFGVHVRLYPDGVPADAAPLPAQGDWVAQRYCAGEERCSYALARDGVLLAHAVYRPALPPAAQFQLLLRRGAGSADRALHRAAGAGAALHRADLLRLDGVFGRALQRDRMQSARDQRPCTCSPQPIRWWACCAATRARRRHRCARPTIAQRCWAC
gi|348020424|gb|AGHY01003165.1|	fig|487527.6.peg.12	peg	gi|348020424|gb|AGHY01003165.1|_8_469	8	469	+	Succinate-semialdehyde dehydrogenase [NAD] (EC 1.2.1.24); Succinate-semialdehyde dehydrogenase [NADP+] (EC 1.2.1.16)		FIG01195103	ff	gtgctggcggtgatgccgtggaacttcccgatctggcaggtgttccgcttcctggcgccggcgctgatggccggcaacgctcgccctgctcaagcacgccagcaacgtgccgcgctgcgccgacgcgatcgacaaggtgctcgccgacgccggcctgccggccggcgtgttcgacgtgctgcacatcgacaacgaccaggccgccgaggtgctgcgcgatgcgcgggtggctgcggtcaccctgaccggcagcgagcgcgccggccgctccatcgccgccaacgccggtgggcagctgaagaagtgcgtgatggaactgggtggcagcgatgccttcgtggtgctggacgacgccgacctcgatgccaccgtggccgcggcggtgaagtcgcgcttcga…	MLAVMPWNFPIWQVFRFLAPALMAGNARPAQARQQRAALRRRDRQGARRRRPAGRRVRRAAHRQRPGRRGAARCAGGCGHPDRQRARRPLHRRQRRWAAEEVRDGTGWQRCLRGAGRRRPRCHRGRGGEVALRQRRADLHRGQALRGGGGDRR
gi|348020432|gb|AGHY01003161.1|	fig|487527.6.peg.13	peg	gi|348020432|gb|AGHY01003161.1|_137_298	137	298	+	2-dehydro-3-deoxygluconate kinase (EC 2.7.1.45)			isu;D-gluconate_and_ketogluconates_metabolism	gtgctgcacgggttgagccaggggtgggacgacaccgccacgatccgcttcggcctggccgccggctgcctcaagcacacgctgcccggcgacgtgctggcgctgagcgaagccgaggtgcaggcctgcgtgggggcgacgcgtttcgatgtgaggcggtga	MLHGLSQGWDDTATIRFGLAAGCLKHTLPGDVLALSEAEVQACVGATRFDVRR
gi|348020448|gb|AGHY01003153.1|	fig|487527.6.peg.14	peg	gi|348020448|gb|AGHY01003153.1|_72_380	72	380	+	Preprotein translocase subunit SecG (TC 3.A.5.1.1)		FIG00001563	isu;Murein_hydrolase_regulation_and_cell_death	atgctgatggtcatcctcaatgtggtctacgtgctggtggcgatcgcgatgatcgcgctgatcctgatgcagcgcggcgccggtgcggcggcgggttccgggttcggcgccggcgcgtccggcaccgtgttcggatcgcgtggcgcgtccaacttcctgtccaagtcgaccaagtggctggccgtggtgttcttcgccatcagcctgttcatggcctggtacgccggccacagcgcgcgtccggccgacgccaatctgggcgtgatgtcgcagtccgccaccccggccccggccgcgccggcccggtga	MLMVILNVVYVLVAIAMIALILMQRGAGAAAGSGFGAGASGTVFGSRGASNFLSKSTKWLAVVFFAISLFMAWYAGHSARPADANLGVMSQSATPAPAAPAR
gi|348020462|gb|AGHY01003146.1|	fig|487527.6.peg.15	peg	gi|348020462|gb|AGHY01003146.1|_552_37	552	37	-	Periplasmic aromatic amino acid aminotransferase beta precursor (EC 2.6.1.57)		FIG00007100	isu;Phenylalanine_and_Tyrosine_Branches_from_Chorismate	gtgctgttggtcgacgaggcctacctgcactacagcgaagagccgtcggtgatcgacctgatcggccagcgccaggacctgctggtgctgcgcaccttctccaagctgtacggcatggccgggctgcgcctgggcctggcggtggcggcgccggggctgcagaccaagctggccgcgttcggccagaatccggtctcggtgcccgccctcgccgccggcatcgccagcctgcaggacctgcaactcgtgccgacccgtcgcgccgagaacgcacgcatccgcgacgccaccatcgcctggctgcagagcaagggctacaagtgcctgccgtcgcaggccaactgctttatggtcgacgtcaagcgcgatggcgccgccttcgccgcagcgatggccaag…	MLLVDEAYLHYSEEPSVIDLIGQRQDLLVLRTFSKLYGMAGLRLGLAVAAPGLQTKLAAFGQNPVSVPALAAGIASLQDLQLVPTRRAENARIRDATIAWLQSKGYKCLPSQANCFMVDVKRDGAAFAAAMAKQGVIVGRSWPIWPKLVRVTVGSEAEMLRFREAFVKARK
gi|348020478|gb|AGHY01003138.1|	fig|487527.6.peg.16	peg	gi|348020478|gb|AGHY01003138.1|_36_161	36	161	+	Imidazole glycerol phosphate synthase cyclase subunit (EC 4.1.3.-)		FIG00000258	isu;Histidine_Biosynthesis	gtgttcgagcgtgccgacgtggacggcgcgctggccgccagcgtcttccacagcggcgccattcccattcccgaactcaagcgcttcctgcgccaacgacagatcgaggtgcgcgatggcgcgtga	MFERADVDGALAASVFHSGAIPIPELKRFLRQRQIEVRDGA
gi|348020484|gb|AGHY01003134.1|	fig|487527.6.peg.17	peg	gi|348020484|gb|AGHY01003134.1|_466_260	466	260	-	hypothetical protein				ttgctgcgggtggtacgcgaggacgacctgccgggctcggaagcgccggcggcgtggctgggctacctgcgcggcggcaacgcgcgcaacctgcgccgcgtcgccgcgcacaaccatcaggacgtggtcacgctggcgctgctgctgcagcgcctggtcgccgccgaggccgaggaacgcgcactggcggcggtcgcatcggcgtag	MLRVVREDDLPGSEAPAAWLGYLRGGNARNLRRVAAHNHQDVVTLALLLQRLVAAEAEERALAAVASA
gi|348020486|gb|AGHY01003133.1|	fig|487527.6.peg.18	peg	gi|348020486|gb|AGHY01003133.1|_15_218	15	218	+	ferrous iron transport protein		FIG01211124	ff	gtgcacgaccgccagcccaacgacgccatcgcgcggcgtctgcgcgagctgggcttcgtcgccggcgagcaggtgcagatgctggccagcgggccgatcggcggcgaaccgctgctggtgcaggtgggctatacgcgcttcgcgctgcgccgcagcgaggcggcgcgggtgcaggtcagtacgctggacgaggtgcgcccgtga	MHDRQPNDAIARRLRELGFVAGEQVQMLASGPIGGEPLLVQVGYTRFALRRSEAARVQVSTLDEVRP
gi|348020498|gb|AGHY01003127.1|	fig|487527.6.peg.19	peg	gi|348020498|gb|AGHY01003127.1|_19_249	19	249	+	hypothetical protein				atgcccgcgccgatccgtgccttcgtcgcgcgccaggatacctgcaaccatttcgccggcgaagaaccgtacgacgcggcgcggggtcgcgaactggaaaaggcgatggccacgtactgcgacggcaatgagcagacctgggcgaagctgcgcgcgcagtaccgtcaggatccagcacgcgatgcctggctgcgccactacggcgaggatgccggtctcgaactgccgtga	MPAPIRAFVARQDTCNHFAGEEPYDAARGRELEKAMATYCDGNEQTWAKLRAQYRQDPARDAWLRHYGEDAGLELP
gi|348020502|gb|AGHY01003125.1|	fig|487527.6.peg.20	peg	gi|348020502|gb|AGHY01003125.1|_24_266	24	266	+	Outer membrane protein A precursor		FIG00003465	isu;Osmoregulation	atgatcgaagtggtcggccacaccgacagcatcggcagcgatgcggtcaaccagcgcctgtccgaacagcgcgcgtcctcggtggccgcatacctgaccgcacagggcgtgcagcccgagcgcatccagaccctgggcgccggcaagaagtatccgattgccgacaacagcaccgaggccggccgcgcgcagaaccgccgcgtcgagatccgcgtggtgccgctgcgcgcctcggccggctga	MIEVVGHTDSIGSDAVNQRLSEQRASSVAAYLTAQGVQPERIQTLGAGKKYPIADNSTEAGRAQNRRVEIRVVPLRASAG
gi|348020520|gb|AGHY01003116.1|	fig|487527.6.peg.21	peg	gi|348020520|gb|AGHY01003116.1|_96_227	96	227	+	Monofunctional biosynthetic peptidoglycan transglycosylase (EC 2.4.2.-)		FIG00899307	ff	gtggccgagttcggcgacggcgtgtacggcgcgcaggcggcggcgcgcagcttctggaacaaggacgcggcgcagctgaccccggcgcagagcgcgctgctggcggcggtgctgccggcgccgcagcgctaa	MAEFGDGVYGAQAAARSFWNKDAAQLTPAQSALLAAVLPAPQR
gi|348020524|gb|AGHY01003114.1|	fig|487527.6.peg.22	peg	gi|348020524|gb|AGHY01003114.1|_101_331	101	331	+	hypothetical protein				atgctgatcgcctccacctggcgccaccgcgaggagatgaagcgcatcggcaagggcaacgccgaccgccgctgggacgtgctgccacagacagccggcgctgacctacgacatcgcccagaaccgcctgatcgtcaccgccgcggtgctgcagccgccggtgtacgcggccggcggcgacgccgcggcgctgtacgggcgcctacggcgcgatggtcgcgcacgagttga	MLIASTWRHREEMKRIGKGNADRRWDVLPQTAGADLRHRPEPPDRHRRGAAAAGVRGRRRRRGAVRAPTARWSRTS
gi|348020546|gb|AGHY01003103.1|	fig|487527.6.peg.23	peg	gi|348020546|gb|AGHY01003103.1|_467_183	467	183	-	glycosyltransferase				gtgctgtgggtcggccatctgagcgagggcaaggatccgctcaccgtgctcgaaggggtggcccgggccagcgagcaattgcccggattgcagctgttctgcgcgttcggcactgcgccactgctgccgatggtgcagcagcgcatccaggcccgatccgcgcctggccggccgcgtgcacctgctgggcagggtggagcacgcgcagatccagaccatgatgcgtgcggccgacctgttcgtatccgccagcctggccgagagctgcggctacgccgcgcttga	MLWVGHLSEGKDPLTVLEGVARASEQLPGLQLFCAFGTAPLLPMVQQRIQARSAPGRPRAPAGQGGARADPDHDACGRPVRIRQPGRELRLRRA
gi|348020550|gb|AGHY01003101.1|	fig|487527.6.peg.24	peg	gi|348020550|gb|AGHY01003101.1|_245_751	245	751	+	Chemotaxis protein cheA (EC 2.7.3.-)		FIG01111811	ff	gtgccgcggctgcggcgcgtggtgcgccaggccgccagcgagaccggcaagcaggtgcacctgagcctggaaggcacccatggcgaactcgaccgcaacgtgctcgatcgcatggtcgcgccgctggagcacatgctgcgcaactctgtcgcgcacggcctggaagcgccggaacagcgccgcggccgcgggcaaggcggaggagggcaacatcgccattcgcctgcgtcgcgaaggttcggaaatcgtgctggaagtggccgacgacggcgccggactcgaccgcgaggcgatccgccgccgcgccgagcagcgcgggctggtcgccgccgacgcggcgctgtccgacgacgaactggatgcgctgatcttcgcgcccgggttcagcacctacgacca…	MPRLRRVVRQAASETGKQVHLSLEGTHGELDRNVLDRMVAPLEHMLRNSVAHGLEAPEQRRGRGQGGGGQHRHSPASRRFGNRAGSGRRRRRTRPRGDPPPRRAARAGRRRRGAVRRRTGCADLRARVQHLRPGQPAGRPRRGHGRGAQRGAPARRLGGHPLGARARA
gi|348020554|gb|AGHY01003099.1|	fig|487527.6.peg.25	peg	gi|348020554|gb|AGHY01003099.1|_222_55	222	55	-	ATP dependent RNA helicase		FIG01210717	ff	atgctggtgatcgcggcgttcctgggcatccaggacccgcgcgagcgcccgccggaggcgcgcggaggcggccgacaacgcacacgccaagttcgccgatgcgccgctcggagttcgtcggcatcctgcgcctgtgggacggttaccggcaggcgcacgaggacctga	MLVIAAFLGIQDPRERPPEARGGGRQRTRQVRRCAARSSSASCACGTVTGRRTRT
gi|348020558|gb|AGHY01003097.1|	fig|487527.6.peg.26	peg	gi|348020558|gb|AGHY01003097.1|_359_216	359	216	-	hypothetical protein				ttgctggaaggcgcgatcggcggctggcggttcctggcggtgtacctgctcggtgcgttcggtgccagcgcgggcgagcctgtggtggcgttggggcgaagccggggcggggcttcggcgcctccggtgccattgccgcattga	MLEGAIGGWRFLAVYLLGAFGASAGEPVVALGRSRGGASAPPVPLPH
gi|348020570|gb|AGHY01003091.1|	fig|487527.6.peg.27	peg	gi|348020570|gb|AGHY01003091.1|_253_83	253	83	-	hypothetical protein				atggcactgggcgctcagcgccgcgggcctggcgctgatggcgctcaaggccggtctgcggccgacgccggccgccccgcccctcgctgcaaagcctgcgctcgcgcacgccgcgtggactgggccgcgatcgccggcggcctgctggtcgtggccagcgccgccgcctga	MALGAQRRGPGADGAQGRSAADAGRPAPRCKACARARRVDWAAIAGGLLVVASAAA
gi|348020571|gb|AGHY01003090.1|	fig|487527.6.peg.28	peg	gi|348020571|gb|AGHY01003090.1|_38_151	38	151	+	hypothetical protein				atgctgatcgagggcctgcgcaacaccgacaaccgcggtcgccaacgacgagccggtgtcgccggcgttcctgttcgccgctgctgctgtggccggcctactgccgcgcgctga	MLIEGLRNTDNRGRQRRAGVAGVPVRRCCCGRPTAAR
gi|348020591|gb|AGHY01003080.1|	fig|487527.6.peg.29	peg	gi|348020591|gb|AGHY01003080.1|_411_22	411	22	-	hypothetical protein				gtgctggagaccggccgcttcgagcgcctgggctccaaccgcgagcggcaggtcaaggtgcgggtgatcagcgccaccaatgccgacctgaccgcgatgatccggcgagggcacgttccgcgaggatctgtactaccggctcaacgcggtggaactgtcgctgccggcgctggccgagcgccccggcgacatcgtgccgctggccgagcacttcctgtccggcgacaagccgctgtcggccggcgcctgccaggcgctgcagcgccacgcctggcccggcaacgtgcgcgaactgcgcaacgtggtgcagcgcgccgaactgctggccggcggcacacagatcgaggccaccgacctcaacctgccgaagccggcagcgcgcgcgcgtga	MLETGRFERLGSNRERQVKVRVISATNADLTAMIRRGHVPRGSVLPAQRGGTVAAGAGRAPRRHRAAGRALPVRRQAAVGRRLPGAAAPRLARQRARTAQRGAARRTAGRRHTDRGHRPQPAEAGSARA
gi|348020593|gb|AGHY01003079.1|	fig|487527.6.peg.30	peg	gi|348020593|gb|AGHY01003079.1|_178_65	178	65	-	hypothetical protein				atggaacagcaggccggcgacctggtggaaatcgtcggccagttccaggtgcgcagcgagccctacccggtggtggcgcatctggtcgcccgcgccactgccaacgtggcctag	MEQQAGDLVEIVGQFQVRSEPYPVVAHLVARATANVA
gi|348020607|gb|AGHY01003072.1|	fig|487527.6.peg.31	peg	gi|348020607|gb|AGHY01003072.1|_107_310	107	310	+	tRNA (Guanine37-N1) -methyltransferase (EC 2.1.1.31)		FIG00000230	idu(1);RNA_methylation idu(1);Ribosome_biogenesis_bacterial	gtgccggcggtgctgcgttccggcaaccatgccgcgatcgcgcgctggcggcgcatgcaggccttggggcggacctggctgcggcgcccggagctgctggacgaggcggcgctgagtgcggccgaccgccgcctgctgcaggaattccgccaggagcgggaggcggccctggccgccgaacaggaaaatccacccaggccctag	MPAVLRSGNHAAIARWRRMQALGRTWLRRPELLDEAALSAADRRLLQEFRQEREAALAAEQENPPRP
gi|348020627|gb|AGHY01003062.1|	fig|487527.6.peg.32	peg	gi|348020627|gb|AGHY01003062.1|_33_434	33	434	+	Protein Implicated in DNA repair function with RecA and MutS		FIG00001724	isu;DNA_repair_system_including_RecA,_MutS_and_a_hypothetical_protein	atgaccgacgtcgccgggtcctcggcctggttcgactgcggcatcgtcgcctacagctacgaggccaagcaggcgctgctgggcgtgcgcccgcagacgctggagcatcacggcgcggtcagccgcgagacggtgatcgagatggtgtccggggcgctggtcaattccggcgccagcgtcgcggtggcggtcaccggccatcgccggccccggtggcggttcggccgacaagccggtcggcagcgtgtggctgggctggaagcgccgcggcggctacgccagcgcgcagttgttccattttccgggcgaccgcgatgcggtgcgccggcagaccgtggccgcggccctgcacggcctggacgcgttgctgtgatcatggccgcgcgccttccccgagga…	MTDVAGSSAWFDCGIVAYSYEAKQALLGVRPQTLEHHGAVSRETVIEMVSGALVNSGASVAVAVTGHRRPRWRFGRQAGRQRVAGLEAPRRLRQRAVVPFSGRPRCGAPADRGRGPARPGRVAVIMAARLPRG
gi|348020629|gb|AGHY01003061.1|	fig|487527.6.peg.33	peg	gi|348020629|gb|AGHY01003061.1|_44_166	44	166	+	hypothetical protein				atggaagcagccggcgtcgcccgcagccactacaagaaccttgccggcggcatcgtggcgatcgactcggcgacaagatctgagtggcggcgggattggggactgaagattcgggatgcgtaa	MEAAGVARSHYKNLAGGIVAIDSATRSEWRRDWGLKIRDA
gi|348020629|gb|AGHY01003061.1|	fig|487527.6.peg.34	peg	gi|348020629|gb|AGHY01003061.1|_419_2284	419	2284	+	Aminopeptidase N		FIG01217247	ff	atgcggccgcacccgccgccaagccggcgcccgccgcggccaaagccggccgaccgcagccacgacgagacctcctacgccgagccgtccaaggtcgtgatcaaggacctggcgctggatctgaagctggatttcgacagcaagcagatcggcggcaccgccacctacacgctggactggaaggacaagagcgccaagcaactggtgctggacacccgcgacctgaccatcgagaaggtgcaggccgacgacggcaagggccagatgacgccgctgcagtacgcgctggcgccggccgacaagatctacggcagcaagctgaccatcgaggcgccgacccagccgcagaagatcagcatcgcctaccacaccgcgccgaccgcctcgggcctgcagtgg…	MRPHPPPSRRPPRPKPADRSHDETSYAEPSKVVIKDLALDLKLDFDSKQIGGTATYTLDWKDKSAKQLVLDTRDLTIEKVQADDGKGQMTPLQYALAPADKIYGSKLTIEAPTQPQKISIAYHTAPTASGLQWLEPSMTEGKQLPFMFSQSQAIHARSWVPLQDTPSVRFTYSAHVVSRPDVMVLMSADNDPKAVRNGDYRFKMPQPIPSYLLAIAAGDLVFKPISARSGVWAEPAMVDKAAKEFEDTEKMIVAAETLYGPYRWGRYDMLVLPPSFPFGGMENPRLTFATPTVIVGDKSLVSLIAHELAHSWSGNLVTNASWKDIWLNEGFTTYVQARITEALYGPEAAEMEREIDQTDLLAELKGMSPADQALALPALTERDPDEALSQVAYVKGAWF…
gi|348020629|gb|AGHY01003061.1|	fig|487527.6.peg.35	peg	gi|348020629|gb|AGHY01003061.1|_2380_2496	2380	2496	+	hypothetical protein				gtgctggagcgagacgatcgcggcgacggattgggcatgcgcgcgttgcgccatgtcaccgtgcgcggcgtcgcatgcgcttacttcgggaggcgcgcatgtccaccacggcgttaa	MLERDDRGDGLGMRALRHVTVRGVACAYFGRRACPPRR
gi|348020629|gb|AGHY01003061.1|	fig|487527.6.peg.36	peg	gi|348020629|gb|AGHY01003061.1|_2704_3054	2704	3054	+	FIG01149443: hypothetical protein		FIG01149442	ff	atgagcgacgcccgcgtcctgtccgattccctgctggccgcgctgcccgatgcgcgtggcggcgaaatcttcaccgaattgctccggcgctccggttgccgtgtggagcgcatcgtctcgcacgggcagaccacgccgcaggacacgccctaccagcaggcgcacgacgaatgggtgctgctgctgcgcggcagcgcgcgggtggtgctatgcgagcgcgaggtgacgctggcgccgggcgaccatctgttcatcccggccgacacgccgcattgggtcaccttcaccgatcccgaccagccgaccgtgtggctggccctccatctcggcgaagccgacgtggtggtgtga	MSDARVLSDSLLAALPDARGGEIFTELLRRSGCRVERIVSHGQTTPQDTPYQQAHDEWVLLLRGSARVVLCEREVTLAPGDHLFIPADTPHWVTFTDPDQPTVWLALHLGEADVVV
gi|348020631|gb|AGHY01003060.1|	fig|487527.6.peg.37	peg	gi|348020631|gb|AGHY01003060.1|_37_240	37	240	+	Chromosome (plasmid) partitioning protein ParB / Stage 0 sporulation protein J		FIG00021843	isu;Bacterial_Cytoskeleton isu;Bacterial_Cytoskeleton isu;Plasmid_replication	gtgccgagcaaccgcaaggccaagccggcgcgcaccgcgccgcaggccgacatcgcctcgctggagaccgagctgtccgagtcgctgggcaccaaggtgtccatcgcccacggccgcggcggcaagggcaagctggtgatccactacaccgacctggacacgctggacggcgtgctcgagaaactgcgcccgcggcaggcctga	MPSNRKAKPARTAPQADIASLETELSESLGTKVSIAHGRGGKGKLVIHYTDLDTLDGVLEKLRPRQA
gi|348020631|gb|AGHY01003060.1|	fig|487527.6.peg.38	peg	gi|348020631|gb|AGHY01003060.1|_277_585	277	585	+	Mitomycin resistance protein				atgcatcccagcaaggtcgaccgccaccatctgctgcgcctgaccgacctgcccaacgtcgggccggcctgcgagaaggatctgcgtctgatcggcatccgcgtgcccgcgcacctgcacggccgcgatccctacgacatgtacgcgcagctgtgcctgcgcaccggcgtggtgcacgaccactgcgtgatcgacgtgttcctgtcgatcgtgcgcttcatgcagggcgagacgccgcgcccgtggtgggaattcagcaaggagcgcaaggcggcgctggccaaggacgcgccgctgaccctgcgctga	MHPSKVDRHHLLRLTDLPNVGPACEKDLRLIGIRVPAHLHGRDPYDMYAQLCLRTGVVHDHCVIDVFLSIVRFMQGETPRPWWEFSKERKAALAKDAPLTLR
gi|348020631|gb|AGHY01003060.1|	fig|487527.6.peg.39	peg	gi|348020631|gb|AGHY01003060.1|_790_1755	790	1755	+	dTDP-glucose 4,6-dehydratase (EC 4.2.1.46)			idu(3);dTDP-rhamnose_synthesis idu(3);Rhamnose_containing_glycans idu(3);CBSS-296591.1.peg.2330	atgcccactctcgtcaccggcgccgccggcttcatcggtgcccacaccgtccgtgcgctgcgcgccgccgggcaactggtggtgggcctggacaactacaacgactactacgacccgcaactcaagcgcgaccgcgtcgccgcgctgtgcccgaacgcggacatccgcaccctggacctgaccgaccgcgacggcctggccgcgctgttcgacgaggtgcagccgacgcgcgtggtgcacctggccgcgcaggccggggtgcgctattcgctgcagaacccctacgcctacgtcgacagcaacctggtcggcttcgtcaacatgctggagctgtgccggcaccgcggcgtgcagcatctggtctatgcgtccagcagttcggtgtacggcgattcggcg…	MPTLVTGAAGFIGAHTVRALRAAGQLVVGLDNYNDYYDPQLKRDRVAALCPNADIRTLDLTDRDGLAALFDEVQPTRVVHLAAQAGVRYSLQNPYAYVDSNLVGFVNMLELCRHRGVQHLVYASSSSVYGDSATPPFSEDQRIDQPRSLYAATKAANELMAHTYAQLYGLRATGLRFFTVYGPWGRPDMAPLLFSRAVLAGRPIEVFNHGRMRRDFTFVADIVAGVLGALDHPSGEAVPHRVFNLGNHTPVELERFIAVIEAAAGRSAEKVYRPMQPGDMIETMADTARAHAAFGFDPSTPIELGLPQVVDWCREYFGAAA
gi|348020631|gb|AGHY01003060.1|	fig|487527.6.peg.40	peg	gi|348020631|gb|AGHY01003060.1|_1840_2562	1840	2562	+	Dolichol-phosphate mannosyltransferase		FIG01213519	ff	atgagccagctttccctttccgtcgtcgtcccggtgttcaacgagcgcgacaacgtgccgccgctggtcgccgagatcgtcgccgcgctgcgcggcacgatcgatttcgagatcgtctacgtcgacgaccattcgcgcgacgacaccctggccgtgctcgaagggctgaaggcgtccacgccggaactgcgcgtgctgcaccacgtcagccagagcgggcagagcacggcggtgcgcaacggcgtcaaggccgcgcgcgggctgtggatcgccaccctcgacggcgacggccagaacgacccggccgacattcccaagctgctggccgcgcgccaggcagccgagccgctggtcaagctgttcgccggctggcgggtgtcgcggcaggattcgggcagc…	MSQLSLSVVVPVFNERDNVPPLVAEIVAALRGTIDFEIVYVDDHSRDDTLAVLEGLKASTPELRVLHHVSQSGQSTAVRNGVKAARGLWIATLDGDGQNDPADIPKLLAARQAAEPLVKLFAGWRVSRQDSGSKRWASKWANAIRARMLRDDTPDTGCGIKLFEREAFLDLPYFDHMHRYLPALMQRAGWQTLSVPVNHRHRTSGVSKYNNLNRALVGIRDLRGVAWLIARSRRTAVQER
gi|348020631|gb|AGHY01003060.1|	fig|487527.6.peg.41	peg	gi|348020631|gb|AGHY01003060.1|_2564_2905	2564	2905	+	FIG01210656: hypothetical protein		FIG01210655	ff	atggaggcgcatttcctcaacgaaccgatccaggcgctgtactggaccgggctgcacgtcaccggctggaagctgatcggctacgtcggcgcgctgatgttcggcggccgctggctggtgcagttcgtcgcctccaagcgcgccggcaagccggtgatcccgcgcctgttctggtacatgagcgtggtcggcagcctgatgacgctgagctacttcatgttctcggccaagcaggactcggtgggcgtgctgcagaacctgttccccgccttcaccgccttctacagcctgtacctggacatcaagcaccgcggctggcgccgcgaccgcgcctcgcattga	MEAHFLNEPIQALYWTGLHVTGWKLIGYVGALMFGGRWLVQFVASKRAGKPVIPRLFWYMSVVGSLMTLSYFMFSAKQDSVGVLQNLFPAFTAFYSLYLDIKHRGWRRDRASH
gi|348020633|gb|AGHY01003059.1|	fig|487527.6.peg.42	peg	gi|348020633|gb|AGHY01003059.1|_684_145	684	145	-	FIG01210488: hypothetical protein		FIG01210487	ff	atgcccgacaacagcgccgactacgacgatcccgacgacctgttcgacgacgacgacgatccggatacccagcagggcctgatctggaacctgctgctgctgatcaacccgggcgacgaggaaagcgccctgcgccagttcgacgcctaccgcgaggccgccggcgaagccgagcgcgaggacgcggactggctgtggacgctgaaggacgcgatcgactggcgggcgggcttctacgtcgacggccacgaccgcgaggcgctgatcggcgcgatcgacgaactggccgcgcgctggaacctgcgcatcgactggggcggcgacatcgacgatgccgacttcctggaggagcacgacagcgcctcgctgctggcggtggcctacgaccgcctgcgcgag…	MPDNSADYDDPDDLFDDDDDPDTQQGLIWNLLLLINPGDEESALRQFDAYREAAGEAEREDADWLWTLKDAIDWRAGFYVDGHDREALIGAIDELAARWNLRIDWGGDIDDADFLEEHDSASLLAVAYDRLREHGYSIWCWDAGSEIRAGWMALSRDDQDMQRLAAILGIDLRPGSDPF
gi|348020633|gb|AGHY01003059.1|	fig|487527.6.peg.43	peg	gi|348020633|gb|AGHY01003059.1|_716_1072	716	1072	+	FIG01211407: hypothetical protein		FIG01211404	ff	gtgtgccgcgcccggcgcgacgacggaagcgcggaactcggcaacggcgccgcgggcgtttatccttcgcagcccggaagacggcgctgtccgccgccacgcgaagccaccacgatgtccgacacgccccccgaccgcctggcggtcagcccgcagagcccgttccacgatgccgagacgctgtcgcgcggcgtcggcatccgcttcaacggcgtggagcgcgacaacgtcgaggagtactcgatcagcgaaggctggatccgcgtgcaggtcggcaaggcgcgcgaccgccgcggcaatcccatgaccatgaaggtcaagggccaggtcgaagccttctggctcgacgccaagtaa	MCRARRDDGSAELGNGAAGVYPSQPGRRRCPPPREATTMSDTPPDRLAVSPQSPFHDAETLSRGVGIRFNGVERDNVEEYSISEGWIRVQVGKARDRRGNPMTMKVKGQVEAFWLDAK
gi|348020633|gb|AGHY01003059.1|	fig|487527.6.peg.44	peg	gi|348020633|gb|AGHY01003059.1|_1891_1130	1891	1130	-	ABC-type multidrug transport system, permease component		FIG00001785	ff	atgaacctgcacgcgatcgccgccatctaccgtttcgagatggcgcgcactttccgcacgttgacccagtccatcgcctcgccggtgctgtcgacctcgctgtacttcgtggtgttcggcgcggcgatcggctcgcgcatgggcgccatcgacggcatcagctacggcgcctacatcatcccggggctggtgatgctgtcgctgctcagcgaaagcatttccaacgcctcgttcggcatctacatgccgcgctgggccggcaccatctacgaggtgctgtcggcgccggtggcatggtgggaggtggtgatcggctacgtcggcgcggcggcgagcaagtcggtgctgctgggcctgctgatcctgctcaccgcgcgcgccttcgtgccgtacgagatc…	MNLHAIAAIYRFEMARTFRTLTQSIASPVLSTSLYFVVFGAAIGSRMGAIDGISYGAYIIPGLVMLSLLSESISNASFGIYMPRWAGTIYEVLSAPVAWWEVVIGYVGAAASKSVLLGLLILLTARAFVPYEIAHPLWMFGFLVLTALTFSLFGFIIGVWADGFEKLQVIPLMVITPLTFLGGSFYSINMLPPLWQKISLFNPVVYLVSGFRWAFYGKADVHIAVSVGMTLGFLALCLGVIWAIFRSGYRLKP
gi|348020633|gb|AGHY01003059.1|	fig|487527.6.peg.45	peg	gi|348020633|gb|AGHY01003059.1|_2337_1888	2337	1888	-	ABC-type multidrug transport system, ATPase component		FIG00001005	ff	gtggagctgcgccacgacatgtggcagatggtgcggcgcctgcgcgagcagggcaccaccatcatcctcaccacgcactacatcgaggaggccgaggacatggccgaccgggtcggcgtggtcaaccgcggcgaactggtgctggtggaggacaagcgcacgctgatgcgcaagctcggcaagaagcaactggcgctgaccctgcaggcgccgctgccggcgttgccgccagcgctggcgacgcagccgctggaactgtccgccgacggcgccacgctgacctacacctacgacgcgcaggccgagcagaccggcatcggcccgctgctgcggcaactggaggagcagggcgtggagatcaaggacctgcagtccagcgagagttcgctggaggaaatc…	MELRHDMWQMVRRLREQGTTIILTTHYIEEAEDMADRVGVVNRGELVLVEDKRTLMRKLGKKQLALTLQAPLPALPPALATQPLELSADGATLTYTYDAQAEQTGIGPLLRQLEEQGVEIKDLQSSESSLEEIFVNLVRPASAAAEVRA
gi|348020635|gb|AGHY01003058.1|	fig|487527.6.peg.46	peg	gi|348020635|gb|AGHY01003058.1|_496_248	496	248	-	hypothetical protein				gtgctgggcatgttgctgctgtacgccgtttccggcagcccctacgcatgggtggacggcagcgatccgtcgctgtcctcggccggtttccaggacagcggcaatgggcgcctggtcggcctgtgcgtgctggtcgcgctggtgctgctgcagggcgtgcacgcgttgctcagccgtcgccgttgggtgcgtgggtgctgcctgggcgcgatggcgttggtctgcctggcctggtcttgctggaactga	MLGMLLLYAVSGSPYAWVDGSDPSLSSAGFQDSGNGRLVGLCVLVALVLLQGVHALLSRRRWVRGCCLGAMALVCLAWSCWN
gi|348020655|gb|AGHY01003048.1|	fig|487527.6.peg.47	peg	gi|348020655|gb|AGHY01003048.1|_61_354	61	354	+	hypothetical protein				gtggaaggcccggcaccgatcagcgtgatcggcgccgagcagatcaaggccaacggcttcacctcggtgccggacggtgctgcgcgcgatgacccagaacggtggcgagacgcagagtccgcagtcggccagcggcgcggacttctcgcccggcgcgcagcaggtggacctgcgcgggctcggcccccaaccacaccctggtgctggtcaacggccgccgcatcgccgacttcccgatgccgttcaagggccgcagcaacttcaccgacatttccaacatcccgctgggcatga	MEGPAPISVIGAEQIKANGFTSVPDGAARDDPERWRDAESAVGQRRGLLARRAAGGPARARPPTTPWCWSTAAASPTSRCRSRAAATSPTFPTSRWA
gi|348020671|gb|AGHY01003040.1|	fig|487527.6.peg.48	peg	gi|348020671|gb|AGHY01003040.1|_22_207	22	207	+	Methylenetetrahydrofolate dehydrogenase (NADP+) (EC 1.5.1.5) / Methenyltetrahydrofolate cyclohydrolase (EC 3.5.4.9)		FIG00000105	isu;One-carbon_metabolism_by_tetrahydropterines isu;One-carbon_metabolism_by_tetrahydropterines isu;Experimental_-_Histidine_Degradation	gtggtgatcgacgtcggcatcaaccgcctggacgacggccgcctggtcggcgacgtcggcttcgacgcggcggcgcagcgcgccagctggatcaccccggtgccgggcggcgtggggccgatgaccgtggccacgctgatgcagaacacgattgaggccgctgaggcggcggggagtcgggattag	MVIDVGINRLDDGRLVGDVGFDAAAQRASWITPVPGGVGPMTVATLMQNTIEAAEAAGSRD
gi|348020681|gb|AGHY01003035.1|	fig|487527.6.peg.49	peg	gi|348020681|gb|AGHY01003035.1|_426_85	426	85	-	FIG01211065: hypothetical protein		FIG01211064	ff	ttgctgatcgcgccgctgcgccagcgctggaacgacatcccgcagcaacgccggcgcatgttcgagcacgcgcagcgctggcagtcgatgaccccggagcaacgcgaccaagcgcgcaagggtgcgcgtcgctacgaggacatgagcccgcaacagcgcgaggaagcgcgggtgctgttcgagccgcatgcgggcgctgccgccggagcagcgcaaggcgctgcgcgaccgctgggaagcgatgacaccgacgcaacgcgccgcctggatccgcgccaatgccagcccggacaaccggccgccgcccgatgcgtccaggtaagcgggcagcgcactccctag	MLIAPLRQRWNDIPQQRRRMFEHAQRWQSMTPEQRDQARKGARRYEDMSPQQREEARVLFEPHAGAAAGAAQGAARPLGSDDTDATRRLDPRQCQPGQPAAARCVQVSGQRTP
gi|348020687|gb|AGHY01003032.1|	fig|487527.6.peg.50	peg	gi|348020687|gb|AGHY01003032.1|_127_417	127	417	+	filamentous haemagglutinin				gtggtcgccggcaccgacctgagcattaccgccgccagcgccaccaacagcgccagcggcatgctcgccgccctgggcaatggcaccttcaccgtgagcggcctgctcagcaacgccggcgcgctgcgtgcgcgccagcgcctgcaactggacgtcggttcgctgcagcagaccgggcgcagctacggcgtgcagcgcctggcgctgatcgccaacggtacggtcgataacagcggcgacctgatcgccggcacgcgcccgcgcgtggaaggcggccagcgtcgccagtag	MVAGTDLSITAASATNSASGMLAALGNGTFTVSGLLSNAGALRARQRLQLDVGSLQQTGRSYGVQRLALIANGTVDNSGDLIAGTRPRVEGGQRRQ
gi|348020687|gb|AGHY01003032.1|	fig|487527.6.peg.51	peg	gi|348020687|gb|AGHY01003032.1|_446_595	446	595	+	hypothetical protein				gtggccctggtcagccagggcgatctgaatctgggcggcaccctggcctcggccggcgccttcagcgcacaagctggcggcgcgctgacccagaagcggcgccctcagcgccgcgaccacgctgcaactgcaatcgttacggcgacctga	MALVSQGDLNLGGTLASAGAFSAQAGGALTQKRRPQRRDHAATAIVTAT
gi|348020689|gb|AGHY01003031.1|	fig|487527.6.peg.52	peg	gi|348020689|gb|AGHY01003031.1|_446_84	446	84	-	RND efflux system, membrane fusion protein CmeA			idu(4);Multidrug_Resistance_Efflux_Pumps	atgagcgccgacgaactggcgcagctgcgccaggcgcagaccgagggcaacgtcgccctcaacgccgaggacaagtccaccgtgcagatcaagctcggcgacggcagcacctatgcgcatgccggtacgctggacttctccggcgccgcggtggatccgagcaccggctcggtgacgctgcgcgcacctgctgccgaacccggaccgggtgctgctgcccggcgccttcgtcagcttcgcggccaacctgggccagcgcaaggacgtctacctgatcccgcaggcggcggtgctgcgcgatgccaagggcgcctacgccatggtcgtcggcaaggacagcaaggtggtgcgccaaggacctga	MSADELAQLRQAQTEGNVALNAEDKSTVQIKLGDGSTYAHAGTLDFSGAAVDPSTGSVTLRAPAAEPGPGAAARRLRQLRGQPGPAQGRLPDPAGGGAARCQGRLRHGRRQGQQGGAPRT
gi|348020695|gb|AGHY01003028.1|	fig|487527.6.peg.53	peg	gi|348020695|gb|AGHY01003028.1|_17_445	17	445	+	dihydroxy-acid and 6-phosphogluconate dehydratase( EC:4.2.1.9 )				atggtgctcaagcactgcgggcccgcgcggctacccaggcatggccgaggtcggcaacatgccgctgccgccgaagctgctgcgcgccggcgtcaccgacatggtgcgcatctccgacgcgcgcatgagcggcaccgcctacggcaccgtggtgcctgcacgcctcgcccgaggccgccgccggccggcaccctggccctggtgcgcgacggcgacatcatcgaactcgacgtccccggccgcgcactgcacctggaagtcagcgacgaggaactgttgcgccgacgcagcgaatggacgccgccaccggcgccgacgcgcggctggagcaagctctacgtggagcacgtgcagcaggcgcacctgggcgcggacctggacttcctagtcggcggcagc…	MVLKHCGPARLPRHGRGRQHAAAAEAAARRRHRHGAHLRRAHERHRLRHRGACTPRPRPPPAGTLALVRDGDIIELDVPGRALHLEVSDEELLRRRSEWTPPPAPTRGWSKLYVEHVQQAHLGADLDFLVGGSGDAVARDSH
gi|348020697|gb|AGHY01003027.1|	fig|487527.6.peg.54	peg	gi|348020697|gb|AGHY01003027.1|_8_127	8	127	+	hypothetical protein				gtggcctgctgcctggtgctgctgggcatcggcctggtcgccgcgcaggtgctgcgccgcggcgccgacgacagccgtccctatggccgcttcgggccgcatccgccacgcggcgagtga	MACCLVLLGIGLVAAQVLRRGADDSRPYGRFGPHPPRGE
gi|348020697|gb|AGHY01003027.1|	fig|487527.6.peg.55	peg	gi|348020697|gb|AGHY01003027.1|_161_541	161	541	+	biphenyl-2,3-diol 1,2-dioxygenase III-related protein		FIG00105129	isu;Biphenyl_Degradation	atgcagatcgaccatctcgaccatctggttctcaccgtcgccgacatcgaggcgacctgcgcgttctatgcgcaggtgctgggcatgcgcgtggtgaccttcggcgaaggccgcaaggcgctggccttcggcgcgcagaagatcaacctgcaccggcatgggcatgagttcgagcccaaggcgcgcgtgcccacgccggggtcggcggatctgtgcctgctcaccgccacgccgctgacgcaggtggcggaggaactgcaggcggccgcggtgccgatcgagagcggtccggtgcagcgcaccggcgcccgtgggccgatcctgtcggtgtacatccgcgatcccgacggcaacctgatcgagatcgctaatcccttgtaa	MQIDHLDHLVLTVADIEATCAFYAQVLGMRVVTFGEGRKALAFGAQKINLHRHGHEFEPKARVPTPGSADLCLLTATPLTQVAEELQAAAVPIESGPVQRTGARGPILSVYIRDPDGNLIEIANPL
gi|348020703|gb|AGHY01003024.1|	fig|487527.6.peg.56	peg	gi|348020703|gb|AGHY01003024.1|_29_163	29	163	+	hypothetical protein				gtggcggccgtaccgcgtgacggtcatcgcggtggcatgccgatgcgctcgtccgcgcgttcgcgcgcttgggtcaacgccgcggcgcatccgcttgccgtgacgccgcagaacctgcttggcgagtgtctgtag	MAAVPRDGHRGGMPMRSSARSRAWVNAAAHPLAVTPQNLLGECL
gi|348020719|gb|AGHY01003016.1|	fig|487527.6.peg.57	peg	gi|348020719|gb|AGHY01003016.1|_18_230	18	230	+	Aspartokinase (EC 2.7.2.4) / Diaminopimelate decarboxylase (EC 4.1.1.20)		FIG00011427	isu;Lysine_Biosynthesis_DAP_Pathway,_GJO_scratch isu;Lysine_Biosynthesis_DAP_Pathway,_GJO_scratch isu;Threonine_and_Homoserine_Biosynthesis	gtggaccagcgctactacgcgatcaaggccaatgcgcatccggccatcctgcaaacgctggtcgaggagggcttcggcctggagtgcgtctcgcacggcgaactgcgccgggttgttcgagatcgtgccggagctgtcgccgcggcgcgtgctggttcacccccagcttcgcgccccgtgccgagtacgaagccgcgttcgcgctgggcgtga	MDQRYYAIKANAHPAILQTLVEEGFGLECVSHGELRRVVRDRAGAVAAARAGSPPASRPVPSTKPRSRWA
gi|348020723|gb|AGHY01003014.1|	fig|487527.6.peg.58	peg	gi|348020723|gb|AGHY01003014.1|_15_152	15	152	+	hypothetical protein				gtggcgaccacccatttcgaccgcgacgacgcacgcggcgacgatgacgccgacggcgcttacgcgcccgacccgcacgaggcgccggtgagcgaccatcacggcgacgacgacggccacggcccccacgccgactga	MATTHFDRDDARGDDDADGAYAPDPHEAPVSDHHGDDDGHGPHAD
gi|348020731|gb|AGHY01003010.1|	fig|487527.6.peg.59	peg	gi|348020731|gb|AGHY01003010.1|_48_248	48	248	+	hypothetical protein				gtgacgccggcgccgaagcgcagcggggccaaggcggccgatgcgtccgcttcgcccaaggcacgcaagtcgaccagggccaaacccgccgcggcgccagcgaagacgcaggcggcgaagaaggtcgccaagcgcaccgcgaaaaaggccgtcaagcgtgcgcccagcagcgccgcgaagcgtcccgcacgaaagcgctga	MTPAPKRSGAKAADASASPKARKSTRAKPAAAPAKTQAAKKVAKRTAKKAVKRAPSSAAKRPARKR
gi|348020739|gb|AGHY01003006.1|	fig|487527.6.peg.60	peg	gi|348020739|gb|AGHY01003006.1|_33_179	33	179	+	hypothetical protein				gtgcaggccgcgctcctgctgcgcagcgccagtccggccgccaccgcgttcgtgcacagccgcctggccggcgcgcatggactggcgttcggcacgctgcagccgggtgcaccggtggaggaactgctggcgcgcgccttgccgtag	MQAALLLRSASPAATAFVHSRLAGAHGLAFGTLQPGAPVEELLARALP
gi|348020743|gb|AGHY01003004.1|	fig|487527.6.peg.61	peg	gi|348020743|gb|AGHY01003004.1|_60_188	60	188	+	hypothetical protein				atgcagaccttcgtgtacccggccgggcacggcttcgaccgccacgtggatccgaaccactacgacgccgacagtgccgagctcgcccgcgaacgcagcctggcgttcctcgccgagcacctgggctga	MQTFVYPAGHGFDRHVDPNHYDADSAELARERSLAFLAEHLG
gi|348020753|gb|AGHY01003000.1|	fig|487527.6.peg.62	peg	gi|348020753|gb|AGHY01003000.1|_424_14	424	14	-	Recombination protein RecR		FIG00000190	isu;DNA_processing_cluster isu;DNA_repair,_bacterial_RecFOR_pathway	gtggaatcgccggccgaccggttggcgatcgagcacgccaccggttaccgcggcctgtacttcatcctgcagggccggctgtcgccgctggacggcatcggcccgcgcgaactgggcctggaccggctcgggcgcgcggctggcgcagggcgaggtggccgagttgatcatcgccaccaattccacggtcgaaggcgaggccaccgcgcaattacctggcgcaactggcgcgccagcacggcggtgcggccgagccggctggcgcagggcctgccgctgggcggtgaactggagtacgtggatcgcggcacgctgtcgcatgccttcggcagccgcagcgaagtgccgcgcgccggcgccgggcgagtgacgccgcacgcggctgcggcgcgaggccga…	MESPADRLAIEHATGYRGLYFILQGRLSPLDGIGPRELGLDRLGRAAGAGRGGRVDHRHQFHGRRRGHRAITWRNWRASTAVRPSRLAQGLPLGGELEYVDRGTLSHAFGSRSEVPRAGAGRVTPHAAAARGRIGL
gi|348020757|gb|AGHY01002998.1|	fig|487527.6.peg.63	peg	gi|348020757|gb|AGHY01002998.1|_204_64	204	64	-	Ferrichrome-iron receptor				gtgccgaccacgctgcggctgagcgtggacaacctcaccgacaagcgttattggcgcgacgtcggtgcttacgaaggcgacgactatctgttcctcggtgcgccgcggacggcgcggttggcggtgcagttcgatttttga	MPTTLRLSVDNLTDKRYWRDVGAYEGDDYLFLGAPRTARLAVQFDF
gi|348020759|gb|AGHY01002997.1|	fig|487527.6.peg.64	peg	gi|348020759|gb|AGHY01002997.1|_12_275	12	275	+	TonB-dependent copper receptor				gtggagcgcaccctctcggccgacacggtctggtatgccggcctcggccgcagcggcgcgcatgcccgactactgggaacgttttccgccgacatgggcccgagcggcgcggccaacgcctttgccgggctgcgccccgagcgcaccacccagctcgatctcggcctgcagtaccgcggcgcgaccgtgcagggctgggtctccgccctacgccgggcgggtgcaggactttcatcctgttcacctatgccgagggcgggatga	MERTLSADTVWYAGLGRSGAHARLLGTFSADMGPSGAANAFAGLRPERTTQLDLGLQYRGATVQGWVSALRRAGAGLSSCSPMPRAG
gi|348020771|gb|AGHY01002991.1|	fig|487527.6.peg.65	peg	gi|348020771|gb|AGHY01002991.1|_34_384	34	384	+	hypothetical protein				gtggagggcgcggtaccgctgcgctggaagcccacccgcgagcacctgttgttgctgcgcggcgcactgctcgacgccgattccgttctcgccgcgctggccgacacggccggcgccgaccaccgccacgccaggagccgacgatgctgctgcccgctgaaatctcgatcgccgggggtgtacgtgcctggcctgctggtgctggggctggccctgctgctggtcgcctgggcactggacgcggtcgccggtcgcgccggcctgtaccgctacgcctggcacccctctctattccgtctggccatctacgtgggcgcgttcgccgcactcggcctgctccttcttccgtga	MEGAVPLRWKPTREHLLLLRGALLDADSVLAALADTAGADHRHARSRRCCCPLKSRSPGVYVPGLLVLGLALLLVAWALDAVAGRAGLYRYAWHPSLFRLAIYVGAFAALGLLLLP
gi|348020771|gb|AGHY01002991.1|	fig|487527.6.peg.66	peg	gi|348020771|gb|AGHY01002991.1|_393_638	393	638	+	hypothetical protein				atgaagacccctgccctgatccgtttcggccctgaccgccatcgtggtgctggtcgccgccctgctggcgcatgcgctgtggcgccattacatgctctcgccctggacccgcgacggtcgcgtccgcgcggaagtggtgcgcatcgcgccggacgtctccgggctggtcgatgcggtggcggtgcgcgacaaccagcacgtcaagcgcggcgacctgttgttcagcgtggaccgcaagcgctatga	MKTPALIRFGPDRHRGAGRRPAGACAVAPLHALALDPRRSRPRGSGAHRAGRLRAGRCGGGARQPARQARRPVVQRGPQAL
gi|348020775|gb|AGHY01002989.1|	fig|487527.6.peg.67	peg	gi|348020775|gb|AGHY01002989.1|_105_272	105	272	+	hypothetical protein				gtgcgcctgctggccagccgtgcctacccggaccgcgccgccgcctcgcgcgccgagtacgcgctcaaacagttgccacgcggccgcaagctggcgttcctgtccacggcagaacccgcgccagcgcccgacagtctggaatcggccgccgaacccgcaatgccgtag	MRLLASRAYPDRAAASRAEYALKQLPRGRKLAFLSTAEPAPAPDSLESAAEPAMP
gi|348020777|gb|AGHY01002988.1|	fig|487527.6.peg.68	peg	gi|348020777|gb|AGHY01002988.1|_16_177	16	177	+	SH protease				gtggtggcgctggtgctggaggccaatccgaacctgaccccggaccaggtcaaggacctgatcgagcgcaccgccacgccgatggcgggacgtgcgtcctgggaagtgggcgcgggctatctcaacgcctactcggcgctgcgcgaggccagcaagaagtga	MVALVLEANPNLTPDQVKDLIERTATPMAGRASWEVGAGYLNAYSALREASKK
gi|348020781|gb|AGHY01002986.1|	fig|487527.6.peg.69	peg	gi|348020781|gb|AGHY01002986.1|_524_264	524	264	-	Excinuclease ABC subunit A paralog of unknown function		FIG00133034	idu(1);DNA_repair,_UvrABC_system	gtggtggaggcgctgggcctgggctatctgacgctggagcgcagcacgccgacgctgtcgcccggcgaactgcagcggctgcgcctggccacgcagatccgctcgcaattgttcggcgtggtctacgtgatggacgagccgtcggcgggcctgcatccggccgacacgcaggcgctgctgggcgcgctggaccagctcaagggcgcgggcaattcgctgttcggtggtcgagcacgagatcgacgtgatccgccatgctga	MVEALGLGYLTLERSTPTLSPGELQRLRLATQIRSQLFGVVYVMDEPSAGLHPADTQALLGALDQLKGAGNSLFGGRARDRRDPPC
gi|348020787|gb|AGHY01002983.1|	fig|487527.6.peg.70	peg	gi|348020787|gb|AGHY01002983.1|_52_168	52	168	+	Glyoxalase/bleomycin resistance protein/dioxygenase				atgctcgccgccggcgtggaattcctggaagccccacgtcacgaaccttacgccacggtcgcggtgttccgcgacctctacggcaacacctgggatctgctggagcccaccgcatga	MLAAGVEFLEAPRHEPYATVAVFRDLYGNTWDLLEPTA
gi|348020789|gb|AGHY01002982.1|	fig|487527.6.peg.71	peg	gi|348020789|gb|AGHY01002982.1|_230_42	230	42	-	Ribose 5-phosphate isomerase A (EC 5.3.1.6)		FIG00000415	isu;D-ribose_utilization isu;Pentose_phosphate_pathway	gtgtggcgcgacggcgtcatcaccgacaacggcaacgtggtgctggacgtgcaccacctgtcgatcaccgacccggtggcgctggagcgcgaactgaaccagatccccggcgtggtctgcgtcggcctgttcgcgcgccgcccggccgacgtggtgatcgtcggtggcgagccgccgcgcgtcttttga	MWRDGVITDNGNVVLDVHHLSITDPVALERELNQIPGVVCVGLFARRPADVVIVGGEPPRVF
gi|348020795|gb|AGHY01002979.1|	fig|487527.6.peg.72	peg	gi|348020795|gb|AGHY01002979.1|_498_304	498	304	-	hypothetical protein				gtggccaggcactccacccagtactggtccaagtatgcggcagagcagggggagtccccggctggcgccaccgcgaagaagggattctggaaatggctggccaccatcggttcggacgtggtcggctatctcgcctcgcacaacatcggcacggcggcgaccgtctccaacgtcgtccacggctggttcaagtga	MARHSTQYWSKYAAEQGESPAGATAKKGFWKWLATIGSDVVGYLASHNIGTAATVSNVVHGWFK
gi|348020795|gb|AGHY01002979.1|	fig|487527.6.peg.73	peg	gi|348020795|gb|AGHY01002979.1|_956_516	956	516	-	hypothetical protein				atgaagaagaagttccttgtcgccaccgctctgctggcgggcagtgtcgtcggcgcccctgcgctggccgccgaaaacccggtggaccaggccggtatccagcacaacatgtacctgggctgcctgatggacctgaatgccacggccgaggacgcgctgaccctgttggtcaagaaatgcggctatgccccaggcgtgccgctggagcggttcgtcgccacgcagcagcccatcgtcgatggcgtcgatccgatccggccgatgaccgagaacctggccggtctgcgccagcagctcagtgcctacgaatactcgttcatcgagcggatggaccagtcgtgcagaacgccgaggacctggacgcggcggcggtgcagttcgaggaactggagcgggagg…	MKKKFLVATALLAGSVVGAPALAAENPVDQAGIQHNMYLGCLMDLNATAEDALTLLVKKCGYAPGVPLERFVATQQPIVDGVDPIRPMTENLAGLRQQLSAYEYSFIERMDQSCRTPRTWTRRRCSSRNWSGRPSRGSIRNRRMVR
gi|348020795|gb|AGHY01002979.1|	fig|487527.6.peg.74	peg	gi|348020795|gb|AGHY01002979.1|_1420_1707	1420	1707	+	hypothetical protein				gtgcctggagcaggaccaggaaccggaggtggtggtgaagttcgatttcgacggcgagcagttgcgcagacgatggacaagtgcggggtggtcgatagccacgagccgtacacgaatacgctgaacaccattgcggcctattgcgaggtggtggcgccgtcgcgatcggccaagcccatcgtgctcggccccacgacgttcctggcccgcgaccaccacagcagctatcgcatggaacacggcttgaaaggcgcgtgcgtggtctgcccggccaagcgcgggcgctga	MPGAGPGTGGGGEVRFRRRAVAQTMDKCGVVDSHEPYTNTLNTIAAYCEVVAPSRSAKPIVLGPTTFLARDHHSSYRMEHGLKGACVVCPAKRGR
gi|348020795|gb|AGHY01002979.1|	fig|487527.6.peg.75	peg	gi|348020795|gb|AGHY01002979.1|_1986_1774	1986	1774	-	TPR repeat-containing protein				gtgaacatcgacgacgggcgcctgcgcgcgcgggcgatggagcgctatttggcggtcgccaagctgccgcgcaacccgcgctggcgggacgtgctgcgctcggcctatttcgtgctcgcgcagtgcgaggggctgtcggcagaggcgcgcgccgccttgcagtccaggatcgacacggtgctggcctacacccgccgggacgcgctcggctga	MNIDDGRLRARAMERYLAVAKLPRNPRWRDVLRSAYFVLAQCEGLSAEARAALQSRIDTVLAYTRRDALG
gi|348020797|gb|AGHY01002978.1|	fig|487527.6.peg.76	peg	gi|348020797|gb|AGHY01002978.1|_410_114	410	114	-	Cytochrome c heme lyase subunit CcmH		FIG00049519	isu;Biogenesis_of_c-type_cytochromes isu;Copper_homeostasis	gtgcgcctgcgcggcgacgccagcgtgttcgtgatcgcgcgcgtcccgggcggcccaccgatgccggtggcggtgcagaagcatccgctgcaggccctgccgttgcgggtgacgctgagcgatgcagacagcccgatgcccacgcagaaactctcgcaactgcagcaggtgcaggtggtcgcccgactgtcgaccagcggcaatgcgatgcgccaggagggcgatttggagtcggcaccggtgacggtgagcctgccggcgactgggccggtggagttggtgatcggcacgccatag	MRLRGDASVFVIARVPGGPPMPVAVQKHPLQALPLRVTLSDADSPMPTQKLSQLQQVQVVARLSTSGNAMRQEGDLESAPVTVSLPATGPVELVIGTP
gi|348020803|gb|AGHY01002975.1|	fig|487527.6.peg.77	peg	gi|348020803|gb|AGHY01002975.1|_122_562	122	562	+	Histidine ammonia-lyase (EC 4.3.1.3)		FIG00091940	isu;Experimental_-_Histidine_Degradation	ttgccggcgttcctgacgcccaagcccggcctcaactccggcttcatgattccgcaggtcaccgccgcggcgctggtgtcggagaacaagcagcgcgcctatccggccagcgtcgactcgatcccgacctcggccaaccaggaagaccacgtatcgatggccgcgcacggcgcgcgccggctgctgccgatggccgagaacgcggccaacgtggtcggcatcgaattgctggcggccgcgcagggctgcgatttccacacgccgctgcgctccagcgccgcactggaagcggcgcgcgcgctgctgcgcacccgtgtaccggcactgcaggacgaccgctacttccacccggacatgctcgccgccaccgcactggtgcgcgacgggcgcgctggccgc…	MPAFLTPKPGLNSGFMIPQVTAAALVSENKQRAYPASVDSIPTSANQEDHVSMAAHGARRLLPMAENAANVVGIELLAAAQGCDFHTPLRSSAALEAARALLRTRVPALQDDRYFHPDMLAATALVRDGRAGRGGGDALARGECLI
gi|348020813|gb|AGHY01002970.1|	fig|487527.6.peg.78	peg	gi|348020813|gb|AGHY01002970.1|_304_83	304	83	-	hypothetical protein				gtgcgcatcagcgtcagtgcgcgatgcaccagcacgccggagttcagcggaccggcgtcggcgggtgccggttgcagcgactgccggcaactggctgcggctgcgcagctcggtccacagccggcgcgcgtcttcgaccgcgggcaactgtggcgcgacgaggcgcgctggcgcgcgctgcggacgacgacgctgcgtcagctggcgacgctgccgctgtga	MRISVSARCTSTPEFSGPASAGAGCSDCRQLAAAAQLGPQPARVFDRGQLWRDEARWRALRTTTLRQLATLPL
gi|348020813|gb|AGHY01002970.1|	fig|487527.6.peg.79	peg	gi|348020813|gb|AGHY01002970.1|_297_413	297	413	+	hypothetical protein				atgcgcacgctctcgcccggctacctgcagcacttcctgtcctacgtcgacgcactgtcctggctgcagcaactgcaggaggctggcgcactggcgaacgccgcagaaatccagtaa	MRTLSPGYLQHFLSYVDALSWLQQLQEAGALANAAEIQ
gi|348020815|gb|AGHY01002969.1|	fig|487527.6.peg.80	peg	gi|348020815|gb|AGHY01002969.1|_185_15	185	15	-	hypothetical protein				atgcgatgttcgtcgactggaacgtcaccgaaagcgcaccgttggctgctgccggtgtggagtgcgctgggcatcgtgctgctggtcggcacgctgcacctggcgcgtgcggtcggcaagctgcacggcatgctcgccaagcacctgctggtgcacagcgcggggcaatga	MRCSSTGTSPKAHRWLLPVWSALGIVLLVGTLHLARAVGKLHGMLAKHLLVHSAGQ
gi|348020817|gb|AGHY01002968.1|	fig|487527.6.peg.81	peg	gi|348020817|gb|AGHY01002968.1|_158_484	158	484	+	hypothetical protein				gtgtacgccgacgccggcaccgccgccgacgctgcggtggaccgcgcacagcgcgcactcgccccaacgacctggcgttcgacccgggcggccagtggctggggttggccgatgggcatcccgacggcacgcccggcacgtatcaccgtctggagtgcggtcgacggtgcgctgcagtggtcctatggcacggccaacatgagctggccgatccgtttgaacagcgatgccacggtggtggtgggcggcagcgacgacagcacggtcactgccttcgtcggccccggttcggccatcggccgcggccgctcggaggcggatggatga	MYADAGTAADAAVDRAQRALAPTTWRSTRAASGWGWPMGIPTARPARITVWSAVDGALQWSYGTANMSWPIRLNSDATVVVGGSDDSTVTAFVGPGSAIGRGRSEADG
gi|348020819|gb|AGHY01002967.1|	fig|487527.6.peg.82	peg	gi|348020819|gb|AGHY01002967.1|_452_6	452	6	-	Endonuclease/exonuclease/phosphatase family protein		FIG00953757	ff	atgccctgcccggccggctcggcgggcgtggcgtgcctgctggccaattcggcaaacggcgccgaaggcctggcggtggcggtggcgcacctgtcgctgggcgccaactcgcgcgcagcgcaactggccttcatcgccgagctgctgtccgatcaccccaacgtggtgctgatgggcgacttcaactgcgtcgccgaccgcccggaaatgcagttcctctaccagcgcacccggctgcaaccgccgggctgccgtggtgccgaccttccccagctggcgcccgcagcgcgccatcgaccacatcctggtcagcgacggcctgcgctgcaacgcgcagcgcgcggtgcccgccgcgttctccgaccacctcgccgtggccaccgagatcgaggtgccgca…	MPCPAGSAGVACLLANSANGAEGLAVAVAHLSLGANSRAAQLAFIAELLSDHPNVVLMGDFNCVADRPEMQFLYQRTRLQPPGCRGADLPQLAPAARHRPHPGQRRPALQRAARGARRVLRPPRRGHRDRGAAALVALRQPRRFLHHA
gi|348020825|gb|AGHY01002964.1|	fig|487527.6.peg.83	peg	gi|348020825|gb|AGHY01002964.1|_23_448	23	448	+	Permease of the drug/metabolite transporter (DMT) superfamily		FIG00002576	idu(2);Queuosine-Archaeosine_Biosynthesis	gtgtcgtcgatcgtcaccaagcacctgaaaggcacgccgccgcacctgctggcgctgctgcaactcggcatcggcatcgtgttgctggcgccgttcgcgcacttcgatgccttgccgtcccgccccgcccagtggctggatctggtggtgctcggcgtggtcaacaccggggtgatgtacgtgctgctgtacggcgccatccagaaactgcccaccgcgatgatcggggcgctgtcgttcatctatccggtggtggcgatcgcggtcgatcgcatcgccttcgggcagtcgctggcgtggacgcaggtgctcggggcgctgctgatcctgctggcggcggcgggggtcaacttcggctggcgcgtgctgccctggccgcgccctgcgcggccggccgcc…	MSSIVTKHLKGTPPHLLALLQLGIGIVLLAPFAHFDALPSRPAQWLDLVVLGVVNTGVMYVLLYGAIQKLPTAMIGALSFIYPVVAIAVDRIAFGQSLAWTQVLGALLILLAAAGVNFGWRVLPWPRPARPAAGTLGTGER
gi|348020831|gb|AGHY01002961.1|	fig|487527.6.peg.84	peg	gi|348020831|gb|AGHY01002961.1|_55_303	55	303	+	biotin synthesis protein		FIG01211792	ff	gtgcacccgatcggcccggcgctgggctggcgccgcgacttcaaggccggcggccagcgctacgcggtgcatcacacccagcatctgtacagccactggcatgccgcctgtgccgcgctcgggctggccatcgacgccgtcagcgaaccgatgctcgaccgggcggacattcccgccggcgcccatttcgatcccgctgcattgcaggtgccggtggccctggtgctgcgcctgcggcggctgccgtga	MHPIGPALGWRRDFKAGGQRYAVHHTQHLYSHWHAACAALGLAIDAVSEPMLDRADIPAGAHFDPAALQVPVALVLRLRRLP
gi|348020833|gb|AGHY01002960.1|	fig|487527.6.peg.85	peg	gi|348020833|gb|AGHY01002960.1|_378_262	378	262	-	COG1565: Uncharacterized conserved protein		FIG00018866	isu;COG1565 isu;Experimental-PTPS	gtgaagcaattgaccctgcccagcgagatgggcgagcgcttccaggtgatgggcttcgaacgcgacgtgtcgctggcgccggcgttcctgtccggcgacctgacttggcggctgtga	MKQLTLPSEMGERFQVMGFERDVSLAPAFLSGDLTWRL
gi|348020871|gb|AGHY01002942.1|	fig|487527.6.peg.86	peg	gi|348020871|gb|AGHY01002942.1|_128_430	128	430	+	DNA repair protein RadA		FIG00000283	idu(1);Proteolysis_in_bacteria,_ATP-dependent idu(1);DNA_repair,_bacterial	atggcgaaagcgaaaacggcctatgtctgcggcgagtgcggcgccgaatacaccaaatggcagggccagtgcaccgaatgcggcgcctggaacacgctgagcgagatcgtgctggagagcgcggccacggccaaggcgccggccgcggcgcgtccgcagcggctgggccggcaaggccgagacgccgaaagatcaccgcgctcaaggacgtggagcatcgcgaccaggcgcgggtctccaccggcatcggcgagttcgaccgggtgctcggtggcggtctggtggaaggcgcggtggtgctga	MAKAKTAYVCGECGAEYTKWQGQCTECGAWNTLSEIVLESAATAKAPAAARPQRLGRQGRDAERSPRSRTWSIATRRGSPPASASSTGCSVAVWWKARWC
gi|348020875|gb|AGHY01002940.1|	fig|487527.6.peg.87	peg	gi|348020875|gb|AGHY01002940.1|_5_124	5	124	+	hypothetical protein				gtggccgaggccttgctggggcgccggcgcgcgcgaattgctggatgtcgacctgccggtctgatggcgtgcgcggtgccgcggcagcgactggtagaagcggcttcaggacgcctctga	MAEALLGRRRARIAGCRPAGLMACAVPRQRLVEAASGRL
gi|348020879|gb|AGHY01002938.1|	fig|487527.6.peg.88	peg	gi|348020879|gb|AGHY01002938.1|_92_352	92	352	+	sensor histidine kinase				gtgatcctgccggagaccggcccggaacaggcgcaggcgatcgccgaacagatccgcagcgcggctcagcaactgagcgccagcgtggacggcaaggcgctgccggcggtgaccatgtcgatcggcgtggccagctacccgcgcgatggcgtggtcgccaccaccctgctgcgcaaggccgacgcggcgctgtaccgggccaagcgctgcggccgcaaccaggtgcaggcctacgattccacgctggacggcatgggctga	MILPETGPEQAQAIAEQIRSAAQQLSASVDGKALPAVTMSIGVASYPRDGVVATTLLRKADAALYRAKRCGRNQVQAYDSTLDGMG
gi|348020881|gb|AGHY01002937.1|	fig|487527.6.peg.89	peg	gi|348020881|gb|AGHY01002937.1|_193_62	193	62	-	Mutator mutT protein (7,8-dihydro-8-oxoguanine-triphosphatase) (EC 3.6.1.-) / Thiamin-phosphate pyrophosphorylase-like protein		FIG01303894	isu;Nudix_proteins_(nucleoside_triphosphate_hydrolases) isu;Nudix_proteins_(nucleoside_triphosphate_hydrolases)	gtggtcggcgactggctgatggaagtgccgcagcgctacccggacaagcgcctgcgcctggaagtgcgccaggtgtcgggcgtggaagggcacgccgcgcggccgcgagggccaggcgctgaccttgggtga	MVGDWLMEVPQRYPDKRLRLEVRQVSGVEGHAARPRGPGADLG
gi|348020887|gb|AGHY01002934.1|	fig|487527.6.peg.90	peg	gi|348020887|gb|AGHY01002934.1|_504_64	504	64	-	esterase/lipase/thioesterase family protein				atgtccgaccgtccgtctccgccccgctggccccgcaatgccctgatcgccctgtcctcgctgctggtctcggcctgcagcagcctgttcttcggcggcctcaacgccagttcctcgcggcacggcctcagcgaacaacgcgggatcgtctacgacgccgcgcacggcctggcgctggacgtgtaccgcccggccggggtgcagcacgcgccggtggtggtgttctttcacggcggcacctggaagaccggcaaccgccagagctaccgctgggccggcgaagcgctggcgcggcacggcgtggtcgcgatccgtgccggactaccgcaagtatccgcaggtgaccctggacggcttcatgcgcgacgcccgccaccgcggtggcctggagccagcggc…	MSDRPSPPRWPRNALIALSSLLVSACSSLFFGGLNASSSRHGLSEQRGIVYDAAHGLALDVYRPAGVQHAPVVVFFHGGTWKTGNRQSYRWAGEALARHGVVAIRAGLPQVSAGDPGRLHARRPPPRWPGASGMPSTTAAIRNGWC
gi|348020893|gb|AGHY01002931.1|	fig|487527.6.peg.91	peg	gi|348020893|gb|AGHY01002931.1|_450_166	450	166	-	Phosphate-specific outer membrane porin OprP ; Pyrophosphate-specific outer membrane porin OprO		FIG00019737	idu(3);Phosphate_metabolism	gtggcctggaaatcggtgtacgccagcgtcgaccatcgcctattcggcctgccggcggagttgagcgtgggcaatcgcctgaacgatcgcggcatcgatggcgccagcagcacgtccaacaccccgttccaggaccgcaacgtggtcggcacgctgatcctgccgcagcgcggcctgttcggcgctcggcctgaccgagcgcgtctacgggcgcggctggcacgcccagcctgtcggtggcgggcaacgacctcaacaacgccggcgacgacaacgacagcctga	MAWKSVYASVDHRLFGLPAELSVGNRLNDRGIDGASSTSNTPFQDRNVVGTLILPQRGLFGARPDRARLRARLARPACRWRATTSTTPATTTTA
gi|348020899|gb|AGHY01002928.1|	fig|487527.6.peg.92	peg	gi|348020899|gb|AGHY01002928.1|_286_65	286	65	-	hypothetical protein				atggatgcgctgcgcgcctggaaccgcgcgcaaccgcagacaccgctgcacccgctctacgacgtggcggaatggccgctgctgccacgcgaatggcgcatgccgacgttcttcctggtgcgcgacggcaaggtcgtcgcgcagttgcagggctggccggcggacgctgccgcgcagcggcgtgcactgaaggcgatgctgcagggtgcgggcctgctgtag	MDALRAWNRAQPQTPLHPLYDVAEWPLLPREWRMPTFFLVRDGKVVAQLQGWPADAAAQRRALKAMLQGAGLL
gi|348020905|gb|AGHY01002925.1|	fig|487527.6.peg.93	peg	gi|348020905|gb|AGHY01002925.1|_14_328	14	328	+	Glucose-6-phosphate isomerase (EC 5.3.1.9)			ff	gtggacggcgcggcgatgcagcgcaccctggccacgctggatccggcgcgcaccgctggcgtgctgatctccaagaccttcggcacccaggaaaccctgctcaacggccagatcctgcgcgactggctgggcggcagcgagcgcctgtacgcggtcagcgccaaccccgagcgcgccgccaaggccttcgacatcgccgccggccgcgtgctgccgatgtgggactgggtcggcggccgctactcgctgtggtcggcggtggggcttcccgatcgcgctggcgatcggcgccgacgccttcgaacagttgcttga	MDGAAMQRTLATLDPARTAGVLISKTFGTQETLLNGQILRDWLGGSERLYAVSANPERAAKAFDIAAGRVLPMWDWVGGRYSLWSAVGLPDRAGDRRRRLRTVA
gi|348020907|gb|AGHY01002924.1|	fig|487527.6.peg.94	peg	gi|348020907|gb|AGHY01002924.1|_710_303	710	303	-	hypothetical protein				ttggaatcctcgctggcgttctgcgaagaactgcgccccagcgaagtgcaactggccgcgcagcgcgaactggacgaacacccgcatctgcgcctgctgctgggcgaggaggtgcagtcggtcatgaccgcgctggcccgcgcccgcacgctgggcgcgcccggcaccttgctgaccacgctcggccagacccggccggcggcgttctcgcacgcggtgcgggtggcgatgctggtgtcctggctggcggcgctgctgtcgcgctcggacgcggcgatgcgcgaggccggcggaagtcggcctgctgcacgaccctcggcgagatgtacgtggatccggcggtgctggaactgccggaggcgcagcaggatttcgcgcagtggcgtatgcagtgcgtgc…	MESSLAFCEELRPSEVQLAAQRELDEHPHLRLLLGEEVQSVMTALARARTLGAPGTLLTTLGQTRPAAFSHAVRVAMLVSWLAALLSRSDAAMREAGGSRPAARPSARCTWIRRCWNCRRRSRISRSGVCSACTR
gi|348020909|gb|AGHY01002923.1|	fig|487527.6.peg.95	peg	gi|348020909|gb|AGHY01002923.1|_531_175	531	175	-	Aminotransferase class I family				atgaacccggacggcgccatctacatgggctcgttctccaaggtgttcgccccgggcctgcgcctgggctacctggtcgcgccggaagcggtgcacgccaagctggtgcaggccaagccaggccgccgacctgcacacgccgtcgttcagccagcgcatcgtctacgaggcggtgcaggacggcttcctggatgcgcacatccccggcatccgtgcgctgtacgccagccgctgcgagcagatgctcgccgccctcgccaagtatttccccgcggcaggtgcgcggaaccggcccggccggcggcatgttcatctgggtcgaactgccggcgcggatggacggcggcgcgctgctga	MNPDGAIYMGSFSKVFAPGLRLGYLVAPEAVHAKLVQAKPGRRPAHAVVQPAHRLRGGAGRLPGCAHPRHPCAVRQPLRADARRPRQVFPRGRCAEPARPAACSSGSNCRRGWTAARC
gi|348020909|gb|AGHY01002923.1|	fig|487527.6.peg.96	peg	gi|348020909|gb|AGHY01002923.1|_911_528	911	528	-	Valine--pyruvate aminotransferase (EC 2.6.1.66)		FIG00132736	isu;Pyruvate_Alanine_Serine_Interconversions isu;Alanine_biosynthesis	gtgctgatcaccaccggatcgcagcagggcctggacctgctcggcaaggtgttcatcgacgaaggcagcaaggtgctggtggaaacgcccagctatctcggcgcgctgcaggcgttctcgctgttccagccggcgttcgcggcaatgcagtcggacgacgacggcgtggtggtggatgcgctggacgatgcgcaactggccggcgcgcgcttcatgtacgtgctgccgaacttccagaacccgaccgggcggcgcctgccgctgcaccggcgccaggcgctggtggcgcgtggcggccgaggccggcgtgccgatcgtcgagggacgatccctacggcgagctgtgctacagcggcgacacgctgccgagcctgctgtcgatga	MLITTGSQQGLDLLGKVFIDEGSKVLVETPSYLGALQAFSLFQPAFAAMQSDDDGVVVDALDDAQLAGARFMYVLPNFQNPTGRRLPLHRRQALVARGGRGRRADRRGTIPTASCATAATRCRACCR
gi|348020917|gb|AGHY01002919.1|	fig|487527.6.peg.97	peg	gi|348020917|gb|AGHY01002919.1|_43_213	43	213	+	hypothetical protein				gtgccttcggcgatccatcttgctggcgctgcgcacctgctcctcctgatcctccggcggcacctgctcggcatcgacccgcgtctgcacggcctggcgcagctgcgcggcgacataggcggccacctgcttccagtgcgtcgcatccgggaatcagcgtctcggcggtga	MPSAIHLAGAAHLLLLILRRHLLGIDPRLHGLAQLRGDIGGHLLPVRRIRESASRR
gi|348020924|gb|AGHY01002915.1|	fig|487527.6.peg.98	peg	gi|348020924|gb|AGHY01002915.1|_42_311	42	311	+	Glycogen synthase, ADP-glucose transglucosylase (EC 2.4.1.21)		FIG00134135	isu;Glycogen_metabolism	atggccgacttcatcaaggccggcggcctgggggacgtggccgcggccttgccgcgcgcgctgcgcggcagttgcgacattcgcgtgctgatcccgggctacccggcggtgctgcgcaagaccggggccgctggagatcgtcggccacatcgccgcgcacgccgggttgccggattgcgcgctgggccgggccgagcgcccggacggcctgtgcgtgtacgtgctgctgttgcccgcagctgttcgagcggcagggctcgccttacgtga	MADFIKAGGLGDVAAALPRALRGSCDIRVLIPGYPAVLRKTGAAGDRRPHRRARRVAGLRAGPGRAPGRPVRVRAAVARSCSSGRARLT
gi|348020927|gb|AGHY01002914.1|	fig|487527.6.peg.99	peg	gi|348020927|gb|AGHY01002914.1|_8_286	8	286	+	Zn-dependent protease with chaperone function PA4632		FIG01111232	ff	atggcggtggtgatgggccacgagatcgcgcatgcgctgctgcggcatggcgcgcagcgcatggcccagcagaagctgacccagatcgggcagatggccggcgccgccggcggcctggatccgcaacagcagcagatggcgatggcggcgatgggctacggctacctgctgccgtacgcgcgcagccacgagacccaggccgacgaggtgggcctgatgctggccgccgcggcgctgtttcgacccgcgcgaagcggtgccgctgtggcaggcggatga	MAVVMGHEIAHALLRHGAQRMAQQKLTQIGQMAGAAGGLDPQQQQMAMAAMGYGYLLPYARSHETQADEVGLMLAAAALFRPARSGAAVAGG
gi|348020927|gb|AGHY01002914.1|	fig|487527.6.peg.100	peg	gi|348020927|gb|AGHY01002914.1|_283_522	283	522	+	Zn-dependent protease with chaperone function PA4632		FIG01111232	ff	atgagcgccagcagcggcggccaggcgccgccggagttcgcctccacccatcccaatccgggcacccgcatccagaacctgcaggcactgatgccgaaggcgctggagtatcggcaacgcttctgcgaatcggcgcgcgggcaccgcgcagtgacggtgcgcgcctgccggcgcgtgactgccttgtcgctgaacgccgcgcgcggctccacgcgcgcgtgcacggcggcgggcgcatga	MSASSGGQAPPEFASTHPNPGTRIQNLQALMPKALEYRQRFCESARGHRAVTVRACRRVTALSLNAARGSTRACTAAGA
gi|348020931|gb|AGHY01002912.1|	fig|487527.6.peg.101	peg	gi|348020931|gb|AGHY01002912.1|_62_301	62	301	+	Ferredoxin			isu;Soluble_cytochromes_and_functionally_related_electron_carriers	gtgatgcgcggcacctcgcaggcgcagccgcgctgcatcgccctggacgcggacatcggccgctacagccgctgcagcatccacgagcggcggccgtcggtgtgcgcggcggtgccggcctcgctggaattcggcgaacgcagcgcgcaatgcgacaagtcgcggctggcgcatggactgccactgctgaccctggccgactgggacggcgtggtcgaacgcaatctgccggacgcctga	MMRGTSQAQPRCIALDADIGRYSRCSIHERRPSVCAAVPASLEFGERSAQCDKSRLAHGLPLLTLADWDGVVERNLPDA
gi|348020937|gb|AGHY01002909.1|	fig|487527.6.peg.102	peg	gi|348020937|gb|AGHY01002909.1|_232_59	232	59	-	hypothetical protein				gtgctggtgttccggccggatctcggcgaacaaggcatcgatcgcaccggcttgctgatgtgcgaggggaagcccgcggcgagcgcgcgcgccacggtcggcctgcgtgccgaacccggacagcgccagcgcccggcacgtccgcgtagtgcggcaactgccgcaaccgggtga	MLVFRPDLGEQGIDRTGLLMCEGKPAASARATVGLRAEPGQRQRPARPRSAATAATG
gi|348020941|gb|AGHY01002907.1|	fig|487527.6.peg.103	peg	gi|348020941|gb|AGHY01002907.1|_212_42	212	42	-	protein of unknown function DUF461				gtgccgctggcccccggcgcccgcgtcgaactcaagcccggcggcatgcacctgatgctgatgcagggcacgggtgcgctgaccgaagaccaggccgtgccgctgcaattgcaattggaagatggtggcaaggccgacgcgacgctgaccgtgcgcaagcaggcgatgtaa	MPLAPGARVELKPGGMHLMLMQGTGALTEDQAVPLQLQLEDGGKADATLTVRKQAM
gi|348020945|gb|AGHY01002905.1|	fig|487527.6.peg.104	peg	gi|348020945|gb|AGHY01002905.1|_648_995	648	995	+	FIG004453: protein YceG like		FIG00004453	isu;COG1399	gtgcgccgcctgcaactgggcatgaaactgcagaccgacccgaccgtgatctacggcatcggcagcgcctacgacggcaacatccgcaagcgcgacctggagaccgatacgccgtacaacacctacacccgcaccggcctgaccccgaccccgatcgccatgcccgggcgcgaggcgctgcgtgccgccaccaacccggcgcccggcgacagcctgtacttcgtggccatcggcgacggcagcggcgcgcatgcgttttcctccaactacgccgagcacaacgcggcggtggcgcgctacctgcagcgcctgcgccaggcgcgcaacgacgcggcggtgtcgccatga	MRRLQLGMKLQTDPTVIYGIGSAYDGNIRKRDLETDTPYNTYTRTGLTPTPIAMPGREALRAATNPAPGDSLYFVAIGDGSGAHAFSSNYAEHNAAVARYLQRLRQARNDAAVSP
gi|348020953|gb|AGHY01002901.1|	fig|487527.6.peg.105	peg	gi|348020953|gb|AGHY01002901.1|_374_60	374	60	-	CDP-diacylglycerol--glycerol-3-phosphate 3-phosphatidyltransferase (EC 2.7.8.5)		FIG00001550	idu(1);CBSS-316407.3.peg.1371 idu(1);Glycerolipid_and_Glycerophospholipid_Metabolism_in_Bacteria idu(1);BarA-UvrY(SirA)_two-component_regulatory_system	gtgtgcgcgtggtgtaccggcgcggcgtcacccgccaaccaggtgaccgtggccgcggcgctgctgtcgttgctggtcgccgcggtggtctacgcgcaaggcgccacgcagccgctgtggtacgcgctgcttcccgtctggatgctgctgcggatggccttgaacgcggtggacggcatgctggcgcgcgagttcggccagcagtcgcggctgggcgcctacctcaacgaactgagcgacgtggtcggccgatgcggcgctgtacctgagcctgctcgggcgtgcctggcgttggcgccggctggctgtggctga	MCAWCTGAASPANQVTVAAALLSLLVAAVVYAQGATQPLWYALLPVWMLLRMALNAVDGMLAREFGQQSRLGAYLNELSDVVGRCGAVPEPARACLALAPAGCG
gi|348020961|gb|AGHY01002897.1|	fig|487527.6.peg.106	peg	gi|348020961|gb|AGHY01002897.1|_315_52	315	52	-	Galactose-binding protein regulator				gtgctggccgaggcaccgtggatcgtgccgccggaaggcagcgtgctgcgccatcgcttcgaactgatgttccagaacgccgggctggaggcgcccaagcgggtgatcgagacctcggcgctagtggtcctgccgcagttgctgcgccacggcgacgcgctggcggtggtgccggaggaccgtggcccgggcatttcgccgaccacggcagcgtggcgatcgtgccggtggcgctgtcctgccgcatggacgccttcggcctga	MLAEAPWIVPPEGSVLRHRFELMFQNAGLEAPKRVIETSALVVLPQLLRHGDALAVVPEDRGPGISPTTAAWRSCRWRCPAAWTPSA
gi|348020965|gb|AGHY01002895.1|	fig|487527.6.peg.107	peg	gi|348020965|gb|AGHY01002895.1|_60_470	60	470	+	Exodeoxyribonuclease V beta chain (EC 3.1.11.5)		FIG00043030	isu;DNA_repair,_bacterial_RecBCD_pathway	gtggacatggtcgaccgccgcttcgtcggcaaccgcttcggcgtggccatgcacgacgtgttcgagcgctgcgacttcgccgcctggcgcgactggcgcccgggccagccggccccgggccgggcaggacgtggccatcatccaagccttgcacagcggtggctaccaagaagacgaagtggccgacggcaccgcggtgctcaccgccttggtcggccacaccctcaccgtggcgttgcccgaaggcacctgccctggcagcggtgccggaggagcagcggcgcaacgaaatggagttccacttcgccatgcgcccgacccgggtcgacgcgctgctggcgctgctgcaccgcttcggcgtggccgggcgagcgccaggcgttcggcgcgcggcacgcc…	MDMVDRRFVGNRFGVAMHDVFERCDFAAWRDWRPGQPAPGRAGRGHHPSLAQRWLPRRRSGRRHRGAHRLGRPHPHRGVARRHLPWQRCRRSSGATKWSSTSPCARPGSTRCWRCCTASAWPGERQAFGARHAWRG
gi|348020967|gb|AGHY01002894.1|	fig|487527.6.peg.108	peg	gi|348020967|gb|AGHY01002894.1|_134_310	134	310	+	hypothetical protein				atgagcaagcgctgggaatatctcaccgtcgaggccaagaccacgctgatgctgggcctgaaactggacgaactgcaggcagatctgaacaagcacggcaagctcggctgggaactggtcaacgtcctcaccctgccgggcaccaagccgctgatgatgttcaagcgggaggtgtga	MSKRWEYLTVEAKTTLMLGLKLDELQADLNKHGKLGWELVNVLTLPGTKPLMMFKREV
gi|348020971|gb|AGHY01002892.1|	fig|487527.6.peg.109	peg	gi|348020971|gb|AGHY01002892.1|_490_275	490	275	-	hypothetical protein				atgcgcagtcgccgcgcgggcagcgtatacgcgctggatctgtccggtctgcggcagccgcaggtgcgggtgtggagcgtgtggcgcgacgacgcgctggccgccagtcggcgcgctgcgcgtgccggacgcgggcggcggcgaactgaagtcgatgcgcacgcatccggcgttcctgcgccagggcgcggccgcggcgctggctcgaccacctga	MRSRRAGSVYALDLSGLRQPQVRVWSVWRDDALAASRRAARAGRGRRRTEVDAHASGVPAPGRGRGAGSTT
gi|348020973|gb|AGHY01002891.1|	fig|487527.6.peg.110	peg	gi|348020973|gb|AGHY01002891.1|_286_65	286	65	-	hypothetical protein				atggccggccgcgggcaacgcgtgtccgcgccgaggcacggtgagcatgggcccgcagcgcatcgtctgcctgaccgaagagccgaccgaaacgctgtacgcgctcggcgagcagcagcgcatcgtcggcatcagcggcttcaccgtgcgccccgccgcaggcgcgccgcgacaagcccaaggtcagcgccttcaccagcgccaagatcgacgagatcctga	MAGRGQRVSAPRHGEHGPAAHRLPDRRADRNAVRARRAAAHRRHQRLHRAPRRRRAATSPRSAPSPAPRSTRS
gi|348020973|gb|AGHY01002891.1|	fig|487527.6.peg.111	peg	gi|348020973|gb|AGHY01002891.1|_423_310	423	310	-	Pyridoxamine 5'-phosphate oxidase (EC 1.4.3.5)		FIG00133002	isu;Pyridoxin_(Vitamin_B6)_Biosynthesis	gtggtgccgcgcagtgtcgagttctggtacggcgccaagtaccgcctgcacgagcgctggcgctacgaagccgacgccgccggccactggagcaagcggatgctgtttccgtga	MVPRSVEFWYGAKYRLHERWRYEADAAGHWSKRMLFP
gi|348020981|gb|AGHY01002887.1|	fig|487527.6.peg.112	peg	gi|348020981|gb|AGHY01002887.1|_441_121	441	121	-	hypothetical protein				atgcgctcgacgccccccgatgaacaggacctgccgctgcagctgagcgtggacggcgacatgaccatccgccgtgcggccgaactgaagccgctgctgctgcccgcgctggagcatcccggcggcctgcgcctgcagctgcaggaggtgaccgacatcgacgccaccggcgtgcagctgctgctggccacccaggccgcactgcgcgcgctgggacggccgttccagctggagggctgcagcaccgcggtcggcgatgcgctggacctgcttggcctcggcgacgcgttcgagcgcgtcggcaacgacacccttcactaa	MRSTPPDEQDLPLQLSVDGDMTIRRAAELKPLLLPALEHPGGLRLQLQEVTDIDATGVQLLLATQAALRALGRPFQLEGCSTAVGDALDLLGLGDAFERVGNDTLH
gi|348020985|gb|AGHY01002885.1|	fig|487527.6.peg.113	peg	gi|348020985|gb|AGHY01002885.1|_429_217	429	217	-	hypothetical protein				atgtcctttcgccaattgcctgccctcggtcccgacggcgaggcctatctgatcaccgagttccaggacgatgcgccgcgccagcagcaggcgcagcacgatccgcacgcggacagcggattgcgctacgaactggccgacggccgcaagctgatccgccgcggccagcagttcgtcaccaccggcggcgagttgaccctgaccgcggtctag	MSFRQLPALGPDGEAYLITEFQDDAPRQQQAQHDPHADSGLRYELADGRKLIRRGQQFVTTGGELTLTAV
gi|348020993|gb|AGHY01002881.1|	fig|487527.6.peg.114	peg	gi|348020993|gb|AGHY01002881.1|_187_504	187	504	+	Enoyl-CoA hydratase (EC 4.2.1.17) / 3,2-trans-enoyl-CoA isomerase (EC 5.3.3.8) / 3-hydroxyacyl-CoA dehydrogenase (EC 1.1.1.35)			idu(2);n-Phenylalkanoic_acid_degradation idu(2);n-Phenylalkanoic_acid_degradation idu(2);Polyhydroxybutyrate_metabolism idu(2);Polyhydroxybutyrate_metabolism idu(2);Isoleucine_degradation idu(2);Isoleucine_degradation idu(2);Fatty_acid_metabolism_cluster idu(2);Fatty_acid_metabolism_cluster idu(2);Butanol_Biosynthesis idu(2);Acetyl-CoA_fermentation_to_Butyrate idu(2);Acetyl-CoA_fermentation_to_Bu…	gtgccctggccgaggggcggctaccgcccgccgctgccggcgcgacgcatccaggtcgccggcgacgtcggcatcgccaccttcaagatgctgctggtcaacatgctggaaggccgcttcatcagcgagtatgactacgagatcgccacccgcatcgccaccgtggtctgcggcggcgaggtcgatcgcggcgcattggtggacgaggaatggctgctcaagctcgagcgcaagcacttcgtcgaactggcccagcaggaaaagacccaggcgcgcatcgggcacatgctcaagacgggtaagccgcttaggaactga	MPWPRGGYRPPLPARRIQVAGDVGIATFKMLLVNMLEGRFISEYDYEIATRIATVVCGGEVDRGALVDEEWLLKLERKHFVELAQQEKTQARIGHMLKTGKPLRN
gi|348020995|gb|AGHY01002880.1|	fig|487527.6.peg.115	peg	gi|348020995|gb|AGHY01002880.1|_4_228	4	228	+	FIG000875: Thioredoxin domain-containing protein EC-YbbN				gtgcgggcacgggcgcggctgggcttcgtcggcgcgctgcaggcagcgccgccgctggagacgctgcaggccacgctggcgcaggatccgagcgatctcaaggcgcgctacctgctgggcgtgcgccacctggtcggcggcgacgacgcggccgcgctggagcagttcctggaatgcttcgccaggaccgcacgttcgaggacggcctgcccaagaaggcgctga	MRARARLGFVGALQAAPPLETLQATLAQDPSDLKARYLLGVRHLVGGDDAAALEQFLECFARTARSRTACPRRR
gi|348021005|gb|AGHY01002875.1|	fig|487527.6.peg.116	peg	gi|348021005|gb|AGHY01002875.1|_212_24	212	24	-	transcriptional regulator		FIG01211514	ff	gtgcaactgcgcccgtccctgctgcccgcgctcggcgtgttcgccgccgcggcgcgccaccagaacttcgcccacgccgcggaggaactgcatctcacccgccagtgcggtcagccaccatgtgcggcgcctggaagcgctgctcggcgccacgcctgttccagcgccacgcgcgcggggtcaagctga	MQLRPSLLPALGVFAAAARHQNFAHAAEELHLTRQCGQPPCAAPGSAARRHACSSATRAGSS
gi|348021011|gb|AGHY01002872.1|	fig|487527.6.peg.117	peg	gi|348021011|gb|AGHY01002872.1|_1_342	1	342	+	NADH dehydrogenase (EC 1.6.99.3)		FIG00008708	isu;Respiratory_dehydrogenases_1	gtggtggtgctgctcaactgggcctgggcgtactggagctaccagcgcgcggcgcggatcatcctcggcgatccacccgcggcggaggaaccgcgaggcgcaggccgcgccgccgacggacaggtgaccactgcccgagcgggctgcgatcctagccggccttttgctgcagtgcagtgcccgtcttggcgaccttcctgttcctgctcgacctgctgggcaccttcgtgttcgcgatcagcggcgccaccgtcggcgtgcgccatcgcctggacctgttcggggtgctggtgctgtcgtgcgcggccgcggtctccggcggcatcgcccgcgacgtgctga	MVVLLNWAWAYWSYQRAARIILGDPPAAEEPRGAGRAADGQVTTARAGCDPSRPFAAVQCPSWRPSCSCSTCWAPSCSRSAAPPSACAIAWTCSGCWCCRARPRSPAASPATC
gi|348021015|gb|AGHY01002870.1|	fig|487527.6.peg.118	peg	gi|348021015|gb|AGHY01002870.1|_192_43	192	43	-	hypothetical protein				gtgaagtacctgctcagcgccggcagcctgctcggcaagcagatcaccggcgcggcggacatcaacaagttctacggcgacagcgcgcccaacctgctgcgcgaggatgcgctggcggcgcgtgcggccgcggccggggcggcgcgatga	MKYLLSAGSLLGKQITGAADINKFYGDSAPNLLREDALAARAAAAGAAR
gi|348021017|gb|AGHY01002869.1|	fig|487527.6.peg.119	peg	gi|348021017|gb|AGHY01002869.1|_292_5	292	5	-	3,4-dihydroxy-2-butanone 4-phosphate synthase (EC 4.1.99.12) / GTP cyclohydrolase II (EC 3.5.4.25)				atgcgtgcctacggctaccagcacgacggcctggataccatcgacgccgacgcgcaactgggcttcggcgccgacgaacgccgctacggcagcgcggtggcgatgctgcgcgggctcggcatccgccgcgtgcgcctgctcaccaacaacccgaacaaggccgagcgcctgcgtgcggcccggcatcgaggtgaccgagcgcatcccggtcaccggcaccatcaccgccgagaacgaaggctacctgcgcaccaaggcggcccgcgccgggcacgcgctggacgttga	MRAYGYQHDGLDTIDADAQLGFGADERRYGSAVAMLRGLGIRRVRLLTNNPNKAERLRAARHRGDRAHPGHRHHHRRERRLPAHQGGPRRARAGR
gi|348021031|gb|AGHY01002862.1|	fig|487527.6.peg.120	peg	gi|348021031|gb|AGHY01002862.1|_150_416	150	416	+	hypothetical protein				atgcctggcagctggctgctgggcgcgcgccaggtgcgctacgacgaacgcgcctgggaccgcaacggcaccctgacccggcgcacccggtcgctccgtgtttctgccgcaggccggcgctgctgttcaaggtgcagccctcgctgtcggctgtacgccagcttcgccaagggcctggccccggggcggcaccgcgccctggttcgccagcaacgccgacagcatcctcgcccccaccaagcgcctaccagcgcgaggccggcatga	MPGSWLLGARQVRYDERAWDRNGTLTRRTRSLRVSAAGRRCCSRCSPRCRLYASFAKGLAPGRHRALVRQQRRQHPRPHQAPTSARPA
gi|348021033|gb|AGHY01002861.1|	fig|487527.6.peg.121	peg	gi|348021033|gb|AGHY01002861.1|_266_30	266	30	-	Methyl-accepting chemotaxis protein I (serine chemoreceptor protein)		FIG00005728	idu(7);Bacterial_Chemotaxis	gtggaagaagccaccgcagcggcacgttcgatggaggagcaggccggtcagctcaccagcacggtggccttgttcaagatcgacagcatcggcggcacagccgctggcgtacatccagcgccggtgccgtccgttgcggccagcgcgccgcgggtcgccaaggtggcggcgcgtccacagcggcagaccgtcaagcgcgccgtggttgcggtcggcggcgactggcaggagttctga	MEEATAAARSMEEQAGQLTSTVALFKIDSIGGTAAGVHPAPVPSVAASAPRVAKVAARPQRQTVKRAVVAVGGDWQEF
gi|348021041|gb|AGHY01002857.1|	fig|487527.6.peg.122	peg	gi|348021041|gb|AGHY01002857.1|_822_193	822	193	-	Permeases of the drug/metabolite transporter (DMT) superfamily				atggcgcgctcgtcgatcggcgtggcgaccatggtctaccacgtgttcccgttcgtcatgctgatcctggcggcattgctgcacggcgagcgcagccgccgtgccgacctgggctggacgctgctggccttcgtcggcgtggcctgttcggccgacccgctgcggctgtggtccagcgccgaccgtggctacttagggcgggatcgcgctgaccctgctgggcgcgctgctgtgcggggcgtcgttgctgatgtcgcggcggatcagccgagagcggccgctggcggtggtgacggtgcagtgctgggtcggggcggcgatgctggccggcttctccagcagcgtcgcgctgcatcccgggcggcactggttctggctggtcggcctgggggtgatcca…	MARSSIGVATMVYHVFPFVMLILAALLHGERSRRADLGWTLLAFVGVACSADPLRLWSSADRGYLGRDRADPAGRAAVRGVVADVAADQPRAAAGGGDGAVLGRGGDAGRLLQQRRAASRAALVLAGRPGGDPQRRGVRAVLQRLPGTCMWQRSRWSAFVYPLVTLLLDYLLYGHRLVPVQWLGLALIVLGTLAVNLRWSWPRRAVAAS
gi|348021043|gb|AGHY01002856.1|	fig|487527.6.peg.123	peg	gi|348021043|gb|AGHY01002856.1|_532_134	532	134	-	TonB-dependent copper receptor				atggcctggcgcgctacgccgggcgcagcatggacggcacccagttccgccgcaccagctacgcccgcgcgcttcgagcgcaccgacctgcccggcgcctgggaggcgctgcgcgccaacgcctacgtcaacgatgccgaccacgtcatggacaactacacgttgcgccggcccaacccgcagtcggcgatgccgatgccgatggcttccaacgtcgaccggcgcatccgcggcgggcgcgtggagtcggagtggcgctgggaccaggtcgtggtccaggccggcctcgacagccagcaaagccgccacccgcgaccgcagcgccagcggcgagggcgcgtaccggagcgtgccgtggcgtaccgacgcgcgcttcgacaatcttggcgcgttcactga	MAWRATPGAAWTAPSSAAPATPARFERTDLPGAWEALRANAYVNDADHVMDNYTLRRPNPQSAMPMPMASNVDRRIRGGRVESEWRWDQVVVQAGLDSQQSRHPRPQRQRRGRVPERAVAYRRALRQSWRVH
gi|348021043|gb|AGHY01002856.1|	fig|487527.6.peg.124	peg	gi|348021043|gb|AGHY01002856.1|_849_538	849	538	-	TonB-dependent copper receptor				gtgcgctggggacccggcgcctccgccggcaccgtgcgcttcgagcgcgatacaccgcactacgccgggccgacgctggagggcgaggccagtgcgctggtcggctcctggaaccgcaatgaccagaacctggacctgcgcggcggcaaccgcagcggctacgcgcgcgtggacgcccaaccgctccgagtccggcgactaccgcgatggcgacggtgcggtggtgcccgcacgctggcgcaaatggaatgccgatgccgcggtcggctggaccccggacccggacaccgtgctggagttctccgccggtag	MRWGPGASAGTVRFERDTPHYAGPTLEGEASALVGSWNRNDQNLDLRGGNRSGYARVDAQPLRVRRLPRWRRCGGARTLAQMECRCRGRLDPGPGHRAGVLRR
gi|348021051|gb|AGHY01002852.1|	fig|487527.6.peg.125	peg	gi|348021051|gb|AGHY01002852.1|_19_261	19	261	+	hypothetical protein				gtggccagcctgcgcgagcgcgagctggaccaggcgctgagcgaggacgtccacgacctgccgcaggcggtgcaggccggcgcggtggcacgctacctgcagcaacgcagcgccggcgcacgacgccctgcgcagccacggcgtgatggtgctcgacgtcaccggcgaggagctgcccgccgcgctgatcgagcgctacctggcggtgaagcgcgacggcttgctgtagcgcgccttggctag	MASLRERELDQALSEDVHDLPQAVQAGAVARYLQQRSAGARRPAQPRRDGARRHRRGAARRADRALPGGEARRLAVARLG
gi|348021073|gb|AGHY01002841.1|	fig|487527.6.peg.126	peg	gi|348021073|gb|AGHY01002841.1|_436_224	436	224	-	putative acyltransferase				gtgttggccgcgaccggcaacgattacttctcgcccaaggccgaattcaacccctacacccacacctggtcactgggcgtggaggagcagttctacctgctgttcccgttgttgttcctggcctggaatcgcggtggccgcggccggctatggtcgacgctgctggtggcgctgggcctcggccgcgtcgctggcgttcgcctggcggcatag	MLAATGNDYFSPKAEFNPYTHTWSLGVEEQFYLLFPLLFLAWNRGGRGRLWSTLLVALGLGRVAGVRLAA
gi|348021075|gb|AGHY01002840.1|	fig|487527.6.peg.127	peg	gi|348021075|gb|AGHY01002840.1|_446_315	446	315	-	hypothetical protein				gtgttccagttggcctggcgcagcggcgaggagggcgcggcgctggcctggtggcgtgcgcgcatgcgccagccgggcgtattcgcggcatggttggcgcagatggcggcgcggctggacgagggcgggtga	MFQLAWRSGEEGAALAWWRARMRQPGVFAAWLAQMAARLDEGG
gi|348021077|gb|AGHY01002839.1|	fig|487527.6.peg.128	peg	gi|348021077|gb|AGHY01002839.1|_369_37	369	37	-	Pheromone shutdown protein		FIG01212203	ff	gtgggtgctgttcaccggtggcctggccgggctgggctgcatcctggccggcggccatccgctgagcgtgatcgccggcgccatcgccgcgccgctgaagccgttccgccccggcgtaccggccggtgcgttcagcgccctggtcgaagtgctacatgcgcaagccggcctatggcgacttcctggcgctgcgcgacgacgcgcagaacctgcgcggctggtaccgcaaccgcagtctcgcgggtggtgctgaccttcctgctgaccaacctgggcagcatgctcggcgtgtggctggccggcttccgcatcttcggcaagctggcgggttga	MGAVHRWPGRAGLHPGRRPSAERDRRRHRRAAEAVPPRRTGRCVQRPGRSATCASRPMATSWRCATTRRTCAAGTATAVSRVVLTFLLTNLGSMLGVWLAGFRIFGKLAG
gi|348021081|gb|AGHY01002837.1|	fig|487527.6.peg.129	peg	gi|348021081|gb|AGHY01002837.1|_548_378	548	378	-	Molybdenum ABC transporter, periplasmic molybdenum-binding protein ModA (TC 3.A.1.8.1)		FIG00021644	ff	gtgcgggtggtggcgaccttccccgccgacagccacgcgccgatcgtgtatccggtggcgccgctgcgcgcgagcgcacaggcgaagagcgccgccgatttcgtgcgctggctgggcacgccaccggcacaggcgatcttccgtcgccacggtttctcgctcgcccgctga	MRVVATFPADSHAPIVYPVAPLRASAQAKSAADFVRWLGTPPAQAIFRRHGFSLAR
gi|348021087|gb|AGHY01002834.1|	fig|487527.6.peg.130	peg	gi|348021087|gb|AGHY01002834.1|_147_437	147	437	+	Oxidoreductase (EC 1.1.1.-)			ff	atgcgcgcgtggacagcaaggcacggacgctctcgcgcacagatcgccaaggcgatccccgggctggagctgcagccgaccttcgcctgggccggcaccttcgccgagaccgaagacggccttccgttcttcggcccgcatccgcagcacggcccgcgcgtgcagttcgccatggcctacggcggcaacggcatcacctacagcatgatcggcgccggcctgctgcgcgcgcagatcgagcggcacgcgcacccgctcaagcgcctgttcggtttttcacgactggattga	MRAWTARHGRSRAQIAKAIPGLELQPTFAWAGTFAETEDGLPFFGPHPQHGPRVQFAMAYGGNGITYSMIGAGLLRAQIERHAHPLKRLFGFSRLD
gi|348021093|gb|AGHY01002831.1|	fig|487527.6.peg.131	peg	gi|348021093|gb|AGHY01002831.1|_141_329	141	329	+	FIG01210333: hypothetical protein		FIG01210332	ff	gtgatccgcggcatctggcagacgcagatgaccctggtggtcgaccgcagcggtgacgacgcccaggtatggccgcgcatctgcaaggaagtggagcgctacccgtccctgcgcaccgtgcgcatccagctcaacccccgccccggccgcgaggaaccggtgcgctggcggcaatgtaggacgttttga	MIRGIWQTQMTLVVDRSGDDAQVWPRICKEVERYPSLRTVRIQLNPRPGREEPVRWRQCRTF
gi|348021099|gb|AGHY01002828.1|	fig|487527.6.peg.132	peg	gi|348021099|gb|AGHY01002828.1|_40_186	40	186	+	2-octaprenyl-3-methyl-6-methoxy-1,4-benzoquinol hydroxylase (EC 1.14.13.-)		FIG00000684	idu(1);Ubiquinone_Biosynthesis idu(1);CBSS-87626.3.peg.3639	gtggcggcctatggcttcgatgcgatcaaccgcctgttctccaacgacgagctgcacctgaccctgctgcgcggcccgctgctgggcctggccggcaagctgccgctgttgatgcacggtttctggaagcgcgcttccggcgtgtag	MAAYGFDAINRLFSNDELHLTLLRGPLLGLAGKLPLLMHGFWKRASGV
gi|348021109|gb|AGHY01002823.1|	fig|487527.6.peg.133	peg	gi|348021109|gb|AGHY01002823.1|_841_134	841	134	-	1-pyrroline-4-hydroxy-2-carboxylate deaminase (EC 3.5.4.22)		FIG00133510	isu;Proline,_4-hydroxyproline_uptake_and_utilization	gtgcaggcggtcgacggccgcatcccggtggtgccgggcatcgccgcgctgtccaccgacgaagcggtgcggctggtgcaggcggccaagcaggtcggctgcggcggcgcgatggtgctgccgccgtacgtgtactccaccgactggcgcgagatgggcgcgcacgtgcgcgcggtgatcggcgccaccgacctgccggtgatcctgtacaacaacccgatcgcctacaagaccgatttcagcgcggcgcagatcgccgagctggcggccgagttcccgaacctgcaggcggtgaaggagtcctctgggcgacgtgcgccgcttcgctgcgctgggcgaactgctcggcgaccgcctggtgctgctggtgggcatggacgatgcgatcgtcgaaggcct…	MQAVDGRIPVVPGIAALSTDEAVRLVQAAKQVGCGGAMVLPPYVYSTDWREMGAHVRAVIGATDLPVILYNNPIAYKTDFSAAQIAELAAEFPNLQAVKESSGRRAPLRCAGRTARRPPGAAGGHGRCDRRRPEHGRQGLDRRPGQRLPEGVGEAVRVGPRRRLPGGQGAVRLVPAAAAPGHRAQVRAADQAGAGEGRPGQRARARAAAGAGRRRARSCVEGHRPRHRHPSRALR
gi|348021141|gb|AGHY01002807.1|	fig|487527.6.peg.134	peg	gi|348021141|gb|AGHY01002807.1|_44_229	44	229	+	Hemin uptake protein		FIG00009315	isu;Hemin_transport_system	gtgctgttgcgtcaccccgaaaccctgagcctgcgcgagcgcaccgtgccgcgcgcggtgccggccgaagaaaccatcagcagccaggcgctgctcaagggtcgccgcgaagtgctgatccagcacggcgaccgtgtctatcgcctgcgccacaccagcaacgacaagctgatcctgaccaagtaa	MLLRHPETLSLRERTVPRAVPAEETISSQALLKGRREVLIQHGDRVYRLRHTSNDKLILTK
gi|348021143|gb|AGHY01002806.1|	fig|487527.6.peg.135	peg	gi|348021143|gb|AGHY01002806.1|_126_308	126	308	+	hypothetical protein				atgcacctgcagatgcagcgccagcgcaccctggagaccgcggcgccggacccgaacatgcgctcggtcggcttcgcgccgactccggagatcaccgccgcgcaggaagcggtcttgcgcgacattccgtcgctgcagccgtaccgcgacagcttcggcaacctgcaggccgaacgccgctga	MHLQMQRQRTLETAAPDPNMRSVGFAPTPEITAAQEAVLRDIPSLQPYRDSFGNLQAERR
gi|348021145|gb|AGHY01002805.1|	fig|487527.6.peg.136	peg	gi|348021145|gb|AGHY01002805.1|_90_419	90	419	+	Cell division transporter, ATP-binding protein FtsE (TC 3.A.5.1.1)		FIG00002914	ff	gtgcgctcggtgctcgagcgcatgggcctgggccaccgcgagaaggcattgccctcgcagctgtcggccggcgagcagcaacgcgtcggcatcgcccgggcgatggtcggcgagccgcgactgctggtcgccgacgaacccaccggcaacctcgatccgaccctggccgcggaaatcatgcaactgttcgccgaactgccggcccgcggcaccagcgtgctggtggtcagccacgacctagccttgctcaagcagatgcgcaagcgcgtgctgatcctggaccacggccgcctgatcgacgacatctcgccgcaggacctggccgaatga	MRSVLERMGLGHREKALPSQLSAGEQQRVGIARAMVGEPRLLVADEPTGNLDPTLAAEIMQLFAELPARGTSVLVVSHDLALLKQMRKRVLILDHGRLIDDISPQDLAE
gi|348021147|gb|AGHY01002804.1|	fig|487527.6.peg.137	peg	gi|348021147|gb|AGHY01002804.1|_5_289	5	289	+	PTS system, mannose-specific IIA component (EC 2.7.1.69)		FIG00002236	isu;Sialic_Acid_Metabolism	gtgccgttcgatgccgacctggatgcgctgctgccgcaggcgtcggcggcattgcggcgggtggacgacggcgatggcgtgctggtggtgacggatctgtatggcgccagcccgagcaatctcgccgcgcggctggcgcgcctgggcacgccggtgcggcgcgtctcggcgttgagcctgccgatgctgctgcggatcatgaactaccccgaacaaggactggagcagttgcccgcgaccgccgccgccggctcgcgcaacggcgtggtgatcgacgatgcttga	MPFDADLDALLPQASAALRRVDDGDGVLVVTDLYGASPSNLAARLARLGTPVRRVSALSLPMLLRIMNYPEQGLEQLPATAAAGSRNGVVIDDA
gi|348021155|gb|AGHY01002800.1|	fig|487527.6.peg.138	peg	gi|348021155|gb|AGHY01002800.1|_40_378	40	378	+	Pca regulon regulatory protein PcaR		FIG00002915	ff	atgggccgggtgctgctggcggcgcagccgggcgacaccttgaacagctacctggaccgcaatccgctgcgcccgcgcaccgaacgtaccgtcaccgaccgtgcgcagttccaggcgctgctcgaacgcgtgcagcgcgacggccatgcggtcgtcgaccaggaactggagatcggcctgcgctcggtggcggtgccggtgcgcaaccgccaggaccgcgtggtggccgcgctcaatgtcggcagctcggtggcgcggatgaccctgggcagcctgcagagcacggtgttgccggcactgcgccacgcggcgcagcagttgagccgcgtgctggactga	MGRVLLAAQPGDTLNSYLDRNPLRPRTERTVTDRAQFQALLERVQRDGHAVVDQELEIGLRSVAVPVRNRQDRVVAALNVGSSVARMTLGSLQSTVLPALRHAAQQLSRVLD
gi|348021171|gb|AGHY01002792.1|	fig|487527.6.peg.139	peg	gi|348021171|gb|AGHY01002792.1|_143_616	143	616	+	hypothetical protein				atgctcaacaacgacatcctgcgctccatccgctacatgctcgacctgagcgaccagaagatcgtcgatctggcgcacctcgccgatcccgcgttcccgatcgacaaggcgcagatcccggcgtggctgaagaaggaggacgaggacggcttcgtcgaatgcagcgacgcggtgctcgcacacgtgctggacgggctggtgttccactaccgtggccgcgacgacagcctgccgccgcgcccggtggaagcgcgtgtcaccaacaacgtggtgctgaagaagctgcgcgtggcgttccagctcaaggacgtggacatgcaccagatcttcgacgcggccggtttcccggtgtccaagccggaactgtcggcgctgttccggcagccggagcacaagaat…	MLNNDILRSIRYMLDLSDQKIVDLAHLADPAFPIDKAQIPAWLKKEDEDGFVECSDAVLAHVLDGLVFHYRGRDDSLPPRPVEARVTNNVVLKKLRVAFQLKDVDMHQIFDAAGFPVSKPELSALFRQPEHKNFRLCGDQLLRNFLKGLTLRVRGAG
gi|348021179|gb|AGHY01002788.1|	fig|487527.6.peg.140	peg	gi|348021179|gb|AGHY01002788.1|_329_120	329	120	-	Dipeptidyl aminopeptidases/acylaminoacyl-peptidases		FIG01111504	ff	atgtacgcggcgatcaagggcaatggcggcaccgcccggctggtgatgctgcccaacgaggcgcatgcctaccgtgcgcgcgagtcggtgctgcagatgctggccgagagcgagcgctggctgcgcacctatctggggccggcgcccgcgcccaaacccacgccgagtccgggtacgactgcgactgcggccggcgccgcgtcgccctga	MYAAIKGNGGTARLVMLPNEAHAYRARESVLQMLAESERWLRTYLGPAPAPKPTPSPGTTATAAGAASP
gi|348021191|gb|AGHY01002782.1|	fig|487527.6.peg.141	peg	gi|348021191|gb|AGHY01002782.1|_23_436	23	436	+	hypothetical protein				atgttcgccggcgacatcagccgcctgctggccaactacgacgtctcccagccggtcccgcgcgaaggcgtggtgccgggcggcgacaaggtccagtccgtgctcaagcgcgccatggcgctgctgggcaccccgtaccgctggggcggcgagagacaccgaaggcttcgactgcagcggcctggtcggctacgtgttccgcaccgcgctgggcatcgaactgccgcgcgtgtcgcgcgagatggcccgcgaggccagcgcccagctgatcaaggaccgcgacgcgctggcgccgggcgacttggtgttcttcggccgcaagggccgcgtcgaccacgtcggcctgtacgtcggcgaggggccgcttcctgcacgcccccagccgcggcaaggacgtgc…	MFAGDISRLLANYDVSQPVPREGVVPGGDKVQSVLKRAMALLGTPYRWGGERHRRLRLQRPGRLRVPHRAGHRTAARVARDGPRGQRPADQGPRRAGAGRLGVLRPQGPRRPRRPVRRRGAASCTPPAAARTCAWTR
gi|348021197|gb|AGHY01002779.1|	fig|487527.6.peg.142	peg	gi|348021197|gb|AGHY01002779.1|_197_15	197	15	-	hypothetical protein				gtgctgctgttgctgtacggcgacaagcgcgaagaggacgccgcccgcggcgttcgagaaggccgccaagctcaagccgcgcgatgcgatggaagcgttggacgcggcgttcgcccgcgaccagttggagtagcgccgcgctgcgcacgccagcgaactgaccgtatcccgatcgtatcgtag	MLLLLYGDKREEDAARGVREGRQAQAARCDGSVGRGVRPRPVGVAPRCARQRTDRIPIVS
gi|348021199|gb|AGHY01002778.1|	fig|487527.6.peg.143	peg	gi|348021199|gb|AGHY01002778.1|_14_403	14	403	+	diguanylate cyclase/phosphodiesterase (GGDEF & EAL domains) with PAS/PAC sensor(s)		FIG00024425	idu(4);Bacterial_hemoglobins	gtggcggcgctgttcgccctgcgctcgcgccggcgcctgcgcgagcagttgcaccggcacgcgcagctgcagcaacgcgaccagcacctgaaactggcgctgtgggcctcgggcgagcacttctgggattacgacctgcaacagcgcacgctgcggctgatgcgcgccgacgaggccacgccgcacgcacaggacatcggcctggtgatccgcgagaacgagccgctgcggatccatcccgaggacatggagcaggcgcggcaggtgctgcaggaacacctgcagggccgcaccgcgatctataccgccgagtaccgcgtggacctggccggggacggggtctggcactgggcgcggggttcggggccgcgtggtcgactacgacgctag	MAALFALRSRRRLREQLHRHAQLQQRDQHLKLALWASGEHFWDYDLQQRTLRLMRADEATPHAQDIGLVIRENEPLRIHPEDMEQARQVLQEHLQGRTAIYTAEYRVDLAGDGVWHWARGSGPRGRLRR
gi|348021201|gb|AGHY01002777.1|	fig|487527.6.peg.144	peg	gi|348021201|gb|AGHY01002777.1|_1_117	1	117	+	hypothetical protein				gtggtgccgggcgcgcgcgaccaggtgttcggccaggtcggcgacgcgctgggtgccattcccggcgtgaccatcgccagccgcgcccagttgctcggctcctacgacgtggcctaa	MVPGARDQVFGQVGDALGAIPGVTIASRAQLLGSYDVA
gi|348021211|gb|AGHY01002772.1|	fig|487527.6.peg.145	peg	gi|348021211|gb|AGHY01002772.1|_207_43	207	43	-	Cell division protein ZipA		FIG00001404	isu;Bacterial_Cytoskeleton	atgctgccgaccgtgcagcgcatgggcgaactgctcgacggcgtggtcctggacgacagccgcaacgccttgggccgccagcgcatcgcccacatccgcgacgacctgcgcgcctacgatcgccagcaccaggcaccgccgttgacgaaggcgccgcgctggtaa	MLPTVQRMGELLDGVVLDDSRNALGRQRIAHIRDDLRAYDRQHQAPPLTKAPRW
gi|348021215|gb|AGHY01002770.1|	fig|487527.6.peg.146	peg	gi|348021215|gb|AGHY01002770.1|_483_238	483	238	-	FIG01211368: hypothetical protein		FIG01211366	ff	gtgggcttgcgctcggcgcgcggcagcctcggccgcgccgtgggaaagcccggagcagcgcagcgccgaggtcgataccgcgttgcaggcgcaggtgctgcgcgagtggcgcgagggctcgacgcgcagtcgcgcatcgccggcatcgcgctgtggtgctggtacaccgacccggacgccggcggcgcgcaggacagcgatttcaccgtgcagcacaagccggcgcaggcggtgctgaagcggtga	MGLRSARGSLGRAVGKPGAAQRRGRYRVAGAGAARVARGLDAQSRIAGIALWCWYTDPDAGGAQDSDFTVQHKPAQAVLKR
gi|348021219|gb|AGHY01002768.1|	fig|487527.6.peg.147	peg	gi|348021219|gb|AGHY01002768.1|_39_365	39	365	+	hypothetical protein				ttgatcgcggacaacccgttcgccaccctggtcaccgtcgccgacggcctgccctgcgccacgccgttgccggtgctgtaccggcgcgacggcgcgcgcatcctggtcgaaggccattggtcgcgggccaacccgcaggcgcgggcacgtcgggccggccttgctgatcgtgcacggcccgcatgcctacggtctcgccgggctggtacccggacaaggaggcgatggcgcgggtgccgacctggaactacgccaccgcgcacctgcacgggcagttgcacgccagcgacgacgcagcacagctggccgatgtggtggcgcggctga	MIADNPFATLVTVADGLPCATPLPVLYRRDGARILVEGHWSRANPQARARRAGLADRARPACLRSRRAGTRTRRRWRGCRPGTTPPRTCTGSCTPATTQHSWPMWWRG
gi|348021229|gb|AGHY01002763.1|	fig|487527.6.peg.148	peg	gi|348021229|gb|AGHY01002763.1|_500_330	500	330	-	hypothetical protein				gtggagacggcgctgacccgcctgggccaccgactacctcgacctgttccagctgcacggcttcgacgcgcgcacgccggtggaggaaaccctgtccaccctcgacgacctggtgcgtgccggcaagatccgctacctgggcgtgtccacacttctccggctggcaactga	METALTRLGHRLPRPVPAARLRRAHAGGGNPVHPRRPGACRQDPLPGRVHTSPAGN
gi|348021231|gb|AGHY01002762.1|	fig|487527.6.peg.149	peg	gi|348021231|gb|AGHY01002762.1|_148_426	148	426	+	FIG01210852: hypothetical protein		FIG01210851	ff	gtggaagctcgcccgctgcaggcgccggggctgcccccctttttcctggtcggtgacgacccgcggtccagagcctggctgcagcagcgcgtcggcacgctgcgccagttgcgcgccgccggcctcgtggtgaatgtcgcgtcgccgctggcgttgcaggagctgcgcgccctggcgccgggtctggtgctctcgccggcctcgggggacgatctggcccgcaggctggggcttcgccactacccggccctgttgaccgccacaggcatcgagcagtga	MEARPLQAPGLPPFFLVGDDPRSRAWLQQRVGTLRQLRAAGLVVNVASPLALQELRALAPGLVLSPASGDDLARRLGLRHYPALLTATGIEQ
gi|348021245|gb|AGHY01002755.1|	fig|487527.6.peg.150	peg	gi|348021245|gb|AGHY01002755.1|_594_325	594	325	-	hypothetical protein				ttgccggacaagcgctggggcgcgggagaccacgccgctgaagatcggcgacagcctgtatctgtgcagcgcacgcaaccaactgatcgcgctggatgcgcgcagcggccgcgaacgctggcgctacgaccccaaggtggcggacaaggcgatcccgtacaccgctgcctgccgcggcgttcagctactacgcggtgcccgatgacaaggcgacggcgtcggccgcgtgccgccatcgcatcatcgaaggcaccctggacgggcgcctga	MPDKRWGAGDHAAEDRRQPVSVQRTQPTDRAGCAQRPRTLALRPQGGGQGDPVHRCLPRRSATTRCPMTRRRRRPRAAIASSKAPWTGA
gi|348021251|gb|AGHY01002752.1|	fig|487527.6.peg.151	peg	gi|348021251|gb|AGHY01002752.1|_34_309	34	309	+	hypothetical protein				ttgctgctgaccgtgttcgccgcgttcaagctgtccgcgctgatcccggcaggcgcggcgctggcgttgagcatcgccctggtggcgggcatgtgcgtgctggcggtggcacaggattcgcgcacgctggcgggtgctgggcacgctggccggcttcctggcgccgctgtggctgtccaccggcagcggcaacccacgtcgcgctgttctcctactacgcgctgctcaacgcggcggtgttcgcgatcgcctggtaccggccctggcgggtgctga	MLLTVFAAFKLSALIPAGAALALSIALVAGMCVLAVAQDSRTLAGAGHAGRLPGAAVAVHRQRQPTSRCSPTTRCSTRRCSRSPGTGPGGC
gi|348021255|gb|AGHY01002750.1|	fig|487527.6.peg.152	peg	gi|348021255|gb|AGHY01002750.1|_751_104	751	104	-	FIG00537880: hypothetical protein		FIG00537879	ff	gtgaccaactgcacggcgccggcgtgttcgtgcgcagctcgtccaactccgaggaccctgcccggcttcagcggtgcgggtttgtacaccaccgtgcccaacgtcacccgcgccgatgcattggccaaggccgtgcagacggtgtgggcgtcggtgtacaacttcgaagcctacgaagcgcgcgctgccgccggcttgccgcaggacgcggtggccatggcggtgctggtgcaactggccgcgccgtccgacagctccggggtgatgatcacccgcgacccgttcgatgccgcgcgccgccacgtcacctacatctcggccaagcgcggcctgggcattcgcgtggtggagggcaagcgccaggccgaacaggtgatgtattcgagctggtccaaggcg…	MTNCTAPACSCAARPTPRTLPGFSGAGLYTTVPNVTRADALAKAVQTVWASVYNFEAYEARAAAGLPQDAVAMAVLVQLAAPSDSSGVMITRDPFDAARRHVTYISAKRGLGIRVVEGKRQAEQVMYSSWSKAVQVLSRSAEDTRLVANAAGGVREVPITGPRQVLTDALIARLAKVGAMTKQALGGADQDIEWAVVGDEVVILQARPYVDGHAR
gi|348021259|gb|AGHY01002748.1|	fig|487527.6.peg.153	peg	gi|348021259|gb|AGHY01002748.1|_61_408	61	408	+	hypothetical protein				atgcccctggataccacgttgcgtctgctggccaaggccagcggcatgagcgccgcggacatcgccgcggccattccgcgcgccggcgcggccacggtcaaagcctggatggccggcgaaaaactgcccggacgcgcccagctcaccgccttggcgcgcacctttcggcgtccccgccggcgcgctgctcggcgaactggccagccaactggacccggcgcgcacccgcggcgaacacgacctgctgcaggcctaccgcgccctcgatgcccgccagcagggccgcgctgctggaagtggcgcgcagcatggccggcaccggcacccgcaagcgggagcagcaaatga	MPLDTTLRLLAKASGMSAADIAAAIPRAGAATVKAWMAGEKLPGRAQLTALARTFRRPRRRAARRTGQPTGPGAHPRRTRPAAGLPRPRCPPAGPRCWKWRAAWPAPAPASGSSK
gi|348021263|gb|AGHY01002746.1|	fig|487527.6.peg.154	peg	gi|348021263|gb|AGHY01002746.1|_422_282	422	282	-	hypothetical protein				ttgcgtggcggacggcggcacgcgccgccgtccgcaatggatcaccagccgaaaccggcaccgatgccgatggagctgtcgtcgctgctgaaggcaccgccgatggtcaccgtggcgcggtcgctgaaggcgcgctggtag	MRGGRRHAPPSAMDHQPKPAPMPMELSSLLKAPPMVTVARSLKARW
gi|348021291|gb|AGHY01002732.1|	fig|487527.6.peg.155	peg	gi|348021291|gb|AGHY01002732.1|_356_475	356	475	+	ATP-dependent DNA ligase (EC 6.5.1.1) LigC		FIG00111848	icw(1);DNA_Repair_Base_Excision	gtggcgctgtggtcgcgcggcgaggaacgcctggacggacgcttcccggaaatcgaggcggccgcggcgaccgctgccgcgcgatgcggtgatcgacggcgaactgctggcgtggcgtga	MALWSRGEERLDGRFPEIEAAAATAAARCGDRRRTAGVA
gi|348021291|gb|AGHY01002732.1|	fig|487527.6.peg.156	peg	gi|348021291|gb|AGHY01002732.1|_472_1218	472	1218	+	ATP-dependent DNA ligase (EC 6.5.1.1) LigC		FIG00111848	icw(1);DNA_Repair_Base_Excision	gtgagggcgaggacgcgccactaccgttcaccgccctgcagacccgcatccagcgccgccaagcccggcgccaagaccctggccgacacgccggcgcgcgtgctcgcctacgacctgctggaactggacggccacgacctgcgcgagcagccgctgcagcaacggcgcgcgcaactgcaggccttgctggaagcgcacgccgacccgcgcctgacgctgtcgccacaggtgcaggcggcaacgtgggagcaggcggcgacgctgcgcgaggcgtcgcgcacgcgcggcgtggaaggcttgatgctcaagcgtgcggggtcgccttaccagtccggccgccgccgtggcgactggtggaaatggaaggtggcgccgctgaccatcgacgcggtgctgctg…	MRARTRHYRSPPCRPASSAAKPGAKTLADTPARVLAYDLLELDGHDLREQPLQQRRAQLQALLEAHADPRLTLSPQVQAATWEQAATLREASRTRGVEGLMLKRAGSPYQSGRRRGDWWKWKVAPLTIDAVLLYAQAGHGRAQHAVHRYTFGLWDGEQLVPVAKAYSGLDDSEILALDRWIRAHTTERFGPVRAVTPYHVFELGFEAVNRSSRHKSGIAVRFPRILRWRHDKPFAEADRLSTLQALAR
gi|348021297|gb|AGHY01002729.1|	fig|487527.6.peg.157	peg	gi|348021297|gb|AGHY01002729.1|_41_160	41	160	+	Methionine aminopeptidase (EC 3.4.11.18)			idu(1);CBSS-312309.3.peg.1965 idu(1);Translation_termination_factors_bacterial	gtgcacacgcgcgacggcaagctatcggcacagttcgagcacaccgtggcggtgaccgccagcggcgtacgggtgctgaccttgcggccgggcgaagtgccggtgtgccgggtggggtga	MHTRDGKLSAQFEHTVAVTASGVRVLTLRPGEVPVCRVG
gi|348021299|gb|AGHY01002728.1|	fig|487527.6.peg.158	peg	gi|348021299|gb|AGHY01002728.1|_670_44	670	44	-	FAD linked oxidase-like				atgccgctgaccccgccggtctcgctggtcaacaagctctcgctgcggccgttcaacgcgctgtactactggcgtcagcccgcgcgcagcaagcgccgggctgagccacgtgctgccgttcttctatccgctggacggcatccgccactggaaccgcatgtacggcccacgcggcttcctgcagtaccagtgcgtgctgccgccggccaccgcgcgcgacggcgtggacgcgctgctggcggaaatcgcccgcagcggcagcggctccttcctggcggtactgaaaggaattcggcgaccttcctgcgcgcggcatgctgtccttcccgcgcccgggcaccacgctggcgctggacttccccaacgacggcgccgacgtgctgcgcctgctggaacggc…	MPLTPPVSLVNKLSLRPFNALYYWRQPARSKRRAEPRAAVLLSAGRHPPLEPHVRPTRLPAVPVRAAAGHRARRRGRAAGGNRPQRQRLLPGGTERNSATFLRAACCPSRARAPRWRWTSPTTAPTCCACWNGWTASSTPPTGALYPAKDARMSAASFQRAYARWQDFSRYLDPRFSSGFWRRVTGVNMQRVLIIGATSAIAEATARR
gi|348021299|gb|AGHY01002728.1|	fig|487527.6.peg.159	peg	gi|348021299|gb|AGHY01002728.1|_1258_800	1258	800	-	oxidoreductase				gtgcgcgcgcggcctggaccggcttcatcggcttcgacccggcctccggccgcctgcgctgcgaggcgggggtcaccctgggccgagatcatcgatctggcgctgccgcaaggctggttcctgccggtgacgccgggcacccgctacgtcaccgtggccggcgccatcgccaacgacgtgcacggcaagaaccatcaccgcaccggcaatttcggccaccacgtgctcgccttcgaactgctgcgcagcgacggcagccgccgcctgtgcacgctgcacgacgatgccgagggctggttcgcggccaccgtcggtggactcggcctgaccgggctgatcacttgggcggagatccagtttgcgccgcgtgccgggcccggcgctggagacggagaacat…	MRARPGPASSASTRPPAACAARRGSPWAEIIDLALPQGWFLPVTPGTRYVTVAGAIANDVHGKNHHRTGNFGHHVLAFELLRSDGSRRLCTLHDDAEGWFAATVGGLGLTGLITWAEIQFAPRAGPGAGDGEHPLRLARRILRAVRRLGRQP
gi|348021303|gb|AGHY01002726.1|	fig|487527.6.peg.160	peg	gi|348021303|gb|AGHY01002726.1|_22_540	22	540	+	porin, putative				gtgcacaccgccttcgacctggacgcgcgcggcaccaccggctcgctgttcccggtcgaactcacctggacgccgggcgccggcggcgcctatccgggcacctacaaggtcggcggttactacgactcctcgcgggtgccgcgcaagggcctggatccgcgcgccaccaccggccgcaacggcgcctacctgctggtagagcagaagctgtattcccctggcggcgaacgcggccgcggcctcaccggcttcgcccagtacatggtctccgaccgcgccaccgcgcagatcacccgctggtacgcactgggcggcgtgtaccagggcatcggccggcgcagccaggaccgcatcgccctgggctacgtcggcgccgacatcaaccatcgcctgctcgac…	MHTAFDLDARGTTGSLFPVELTWTPGAGGAYPGTYKVGGYYDSSRVPRKGLDPRATTGRNGAYLLVEQKLYSPGGERGRGLTGFAQYMVSDRATAQITRWYALGGVYQGIGRRSQDRIALGYVGADINHRLLDARRAALLDAGVPAGRAGVRARYRRGTLRTVLQRASSRRG
gi|348021305|gb|AGHY01002725.1|	fig|487527.6.peg.161	peg	gi|348021305|gb|AGHY01002725.1|_70_186	70	186	+	hypothetical protein				gtggttacgtgccgtcacgttgctgcgctggcgccatcgaacgacatcagcgacgatcctgggctacgtgcaggcgttgcaggcgctctttcgctgaggctggggcgcctgtcgtag	MVTCRHVAALAPSNDISDDPGLRAGVAGALSLRLGRLS
gi|348021315|gb|AGHY01002720.1|	fig|487527.6.peg.162	peg	gi|348021315|gb|AGHY01002720.1|_330_64	330	64	-	Probable protease htpX homolog (EC 3.4.24.-)				atgatcgcgatgtggttctcgcgctaccgtgagttccgcgccgacgccggcggcgccagccttggccggccgcggcaagatgatcgccgcgctgcagcggctggagctcaaccacggccagaagcacgctgccgtcgcaggtgcaggcgttcgggcatcgccggcggcctggggcagggcctgcgcaagttgttcatgagccacccgccgttggccgagcgcatcgccaccctgcgcgccgcgcaggtcaacgcaactgtgagctga	MIAMWFSRYREFRADAGGASLGRPRQDDRRAAAAGAQPRPEARCRRRCRRSGIAGGLGQGLRKLFMSHPPLAERIATLRAAQVNATVS
gi|348021323|gb|AGHY01002716.1|	fig|487527.6.peg.163	peg	gi|348021323|gb|AGHY01002716.1|_232_714	232	714	+	Phosphogluconate dehydratase (EC 4.2.1.12)		FIG00001026	ff	atggagctgtcgctgttctcgcgcgacgtgatcgcccaggccaccgcgatcggcctcagccacgacatgttcgacaccagcctgtacctgggcgtgtgcgacaagatcgtgcccggcctggctgatcggtgcgctggccttcggccacctgccggcggtgttcgtgccggccgggccgatgaccccgggcatccccaacaagcagaaggccgaggtgcgcgagcgctacgccgccggccaggccagccgcgaggaactgctggccgccgaatcggcgtcctaccacgctcccggtacctgcaccttctacggcaccgccaattccaaccaagtgctgctggaagcgatgggcgtgcagttgcccggcgcctccttcgtcaaccccggcaccccgctacg…	MELSLFSRDVIAQATAIGLSHDMFDTSLYLGVCDKIVPGLADRCAGLRPPAGGVRAGRADDPGHPQQAEGRGARALRRRPGQPRGTAGRRIGVLPRSRYLHLLRHRQFQPSAAGSDGRAVARRLLRQPRHPATRGADPAGDRAPRCASPRWATTSARWAG
gi|348021331|gb|AGHY01002712.1|	fig|487527.6.peg.164	peg	gi|348021331|gb|AGHY01002712.1|_407_532	407	532	+	hypothetical protein				atgtcgcagcggtcgatccagcggagacggacgtggggcgtgctgctcgccacggccgccgcctcggcgatcgcggcagccgggcggcttcgacatcccgggccgggccattggcaccggcgctga	MSQRSIQRRRTWGVLLATAAASAIAAAGRLRHPGPGHWHRR
gi|348021335|gb|AGHY01002710.1|	fig|487527.6.peg.165	peg	gi|348021335|gb|AGHY01002710.1|_776_102	776	102	-	Sodium - Bile acid symporter		FIG00042768	isu;CBSS-349102.4.peg.3442	gtgctgttcctgtgcgcgctgccgtccacggtgcagtcgtcgatcgccttcacctcgatggccggcggcaacgtgccggcggcggtgtgcagcgcctcgctgtcgagcctgctcggggtgttcctgacgccgctgctgatgggcctgctggccggcgcgcagagcgccatggccaacccgctggaggcgatgggcaagatcatgctgcaactgctggtgccgttcgtcgccggccacctgctgcagcgctggatcggcggctgggtcgagcgccgccgtgcggtgctgcgctacaccgaccagagcaccatcctgctggtggtgtacaccgcgttcagcgccgcggtggtcgaaggcctgtggcgcaagacgccgctgccggcactgctcggcgtcgcc…	MLFLCALPSTVQSSIAFTSMAGGNVPAAVCSASLSSLLGVFLTPLLMGLLAGAQSAMANPLEAMGKIMLQLLVPFVAGHLLQRWIGGWVERRRAVLRYTDQSTILLVVYTAFSAAVVEGLWRKTPLPALLGVALVGALLLALAMTLITFGARRLGFSREDEIPIVFCGSKKSLATGVPMAKVLFASGSLGAIVLPVMIYHQIQLIVCAVIAQRYARAAKAEARP
gi|348021337|gb|AGHY01002709.1|	fig|487527.6.peg.166	peg	gi|348021337|gb|AGHY01002709.1|_28_168	28	168	+	methyl parathion hydrolase				atgctggcgcaggcggcggaccacggctggtgggtggccggcgcgcacctgccgttcccgggcctgggtcacgtccgtcgcgagggcgaggcgttcgcctgggtgccgaccgagttctcgccgttgccggccgcgcgttga	MLAQAADHGWWVAGAHLPFPGLGHVRREGEAFAWVPTEFSPLPAAR
gi|348021353|gb|AGHY01002701.1|	fig|487527.6.peg.167	peg	gi|348021353|gb|AGHY01002701.1|_131_418	131	418	+	DNA polymerase III subunits gamma and tau (EC 2.7.7.7)		FIG00000414	icw(1);DNA_processing_cluster	gtgctgcggctgtcgctgtcgccgggcttcgaatacctgcagtccgagcgctcgcttggcgaactggccgcggccctggctgatgcgctgggccagcgcccgaagatcgtcatcgaaagcggcatcgcggtcgatgccgaaaccctgcatgagcgctcgcaccggcaacgcggcgagcgccagaacgcggccgagaccgcgttcatgaacgacccggcggtgcaggcgctgatccagcagcaaggcgcgcgggtcgttcccgattccatccgtccctacgatgagtga	MLRLSLSPGFEYLQSERSLGELAAALADALGQRPKIVIESGIAVDAETLHERSHRQRGERQNAAETAFMNDPAVQALIQQQGARVVPDSIRPYDE
gi|348021353|gb|AGHY01002701.1|	fig|487527.6.peg.168	peg	gi|348021353|gb|AGHY01002701.1|_425_745	425	745	+	FIG000557: hypothetical protein co-occurring with RecR		FIG00000557	isu;DNA_processing_cluster	atgcgcggcaatatcgcccaactgatgcaacaggcgcagaagatgcaggaaaacctgcagcgcgcccaggaagaactggccaagctggaagtcaccggcagcgccggcggcggcatggtcaacgtgaccctgaccggcgccaaggagtgccgcaaggtgcggatcgatccgagcatcctggccgaccaggaaatggccgaggatctgatcgccgccgccttcaacgacgcctccaacaagatcgacgccgaatccaaggcgcgcatgggcgcggccacggccggcatgccgatcccgccgggcatgaagctgccgttctga	MRGNIAQLMQQAQKMQENLQRAQEELAKLEVTGSAGGGMVNVTLTGAKECRKVRIDPSILADQEMAEDLIAAAFNDASNKIDAESKARMGAATAGMPIPPGMKLPF
gi|348021355|gb|AGHY01002700.1|	fig|487527.6.peg.169	peg	gi|348021355|gb|AGHY01002700.1|_768_109	768	109	-	Dehydrogenases with different specificities (related to short-chain alcohol dehydrogenases)		FIG01217887	ff	gtggcgcgcgacctcgatgcactcgagaccgcgcgcgacgaactgcgcgacgccttccccgagcgcgagatcctggcactggccgccgacgtcgccgacgacgaggaccgccgcgagatcctggattgggtcgaggaccatgccgacggcctgcacctgctgatcaacaacgccggcggcaacgtcagcaaggccgcggtggactacaccgaggacgaatggcgcggcatcttcgagaccaacctgttctccgcgtttgaactgtcgcgctacgcgcatccgctgctggcgcggcatgcggcctcggcgatcgtcaacgtcggcagcgtgtccgggctgacccacgtgcgcagcggcgcgccctacggcatgaccaaggcggcgctgcaccagctcacc…	MARDLDALETARDELRDAFPEREILALAADVADDEDRREILDWVEDHADGLHLLINNAGGNVSKAAVDYTEDEWRGIFETNLFSAFELSRYAHPLLARHAASAIVNVGSVSGLTHVRSGAPYGMTKAALHQLTRNLAAEWAEDGIRVNAVAPWYIRTRRTSGPLSDPDYYEQVIERTPMRRIGEPEEVAAAVGFLCLPAASYVTGECIAVDGGFLRYGF
gi|348021359|gb|AGHY01002698.1|	fig|487527.6.peg.170	peg	gi|348021359|gb|AGHY01002698.1|_452_883	452	883	+	Sulfite reductase [NADPH] flavoprotein alpha-component (EC 1.8.1.2)		FIG00001318	isu;Cysteine_Biosynthesis	gtggcgccgttccgcggcttcgtgcaggaacgcgccgaaagcggcgccagcggccgcaactggctgttcttcggcgcccgccacttcaaccgcgacttcctctaccaggccgaatggcaacaggcactgcgcagcggcgaactgcaccggctggacctggcgttctcgcgcgacgtgcagccgctgcgcggcggcaccgctccttccaaggtgtacgtgcagcagcgcctgcgcgaacacggccgcgccgtctacgactggctgcagcacggcgcgcacctgtacgtgtgcggcgccatcgccatgggcaaggacgtgcacgccaccctgctggacatcgtcgccgaacacggcgcccgcagccccgaagacgccgccgcctacctcagccagctacag…	MAPFRGFVQERAESGASGRNWLFFGARHFNRDFLYQAEWQQALRSGELHRLDLAFSRDVQPLRGGTAPSKVYVQQRLREHGRAVYDWLQHGAHLYVCGAIAMGKDVHATLLDIVAEHGARSPEDAAAYLSQLQQEGRYARDVY
gi|348021361|gb|AGHY01002697.1|	fig|487527.6.peg.171	peg	gi|348021361|gb|AGHY01002697.1|_34_309	34	309	+	hypothetical protein				atgtacgcatccaggagcgcctgccgctgcgcaccgtcgacctcggcaacgcaactcctgccgcgcgacggcaagcccggcttgcgtccctacccgagcaacggcgcgctgatgcgccatctgctgctggcacgcggccggcgggctgtgcagccgcagcctgcggctgatgcacctgcaacgacctggccctgctcgccccgcacatgcgcgccagcgactggcaactcgtggccggtgccgacgcctggtgggcgtggccgccgctgcggctga	MYASRSACRCAPSTSATQLLPRDGKPGLRPYPSNGALMRHLLLARGRRAVQPQPAADAPATTWPCSPRTCAPATGNSWPVPTPGGRGRRCG
gi|348021363|gb|AGHY01002696.1|	fig|487527.6.peg.172	peg	gi|348021363|gb|AGHY01002696.1|_93_329	93	329	+	Ureidoglycolate/malate/sulfolactate dehydrogenase family (EC 1.1.1.-)		FIG00132977	idu(1);Proline,_4-hydroxyproline_uptake_and_utilization	gtgccggcgcagcgccctaccacggcgaatttgattttggcgttggatccggcgcgcttcctcggcgtcgaccgcgccgcgcacctggcccgtgcggaagcgttctttgccgcctacgaggccaccggggcacgcctgccttcgcaacgccgctaccaggcgcgggaacgtagtcgcagtgaaggcgtgcggattccgcaggccctgtatcaggacctggtggccttgctcgattga	MPAQRPTTANLILALDPARFLGVDRAAHLARAEAFFAAYEATGARLPSQRRYQARERSRSEGVRIPQALYQDLVALLD
gi|348021365|gb|AGHY01002695.1|	fig|487527.6.peg.173	peg	gi|348021365|gb|AGHY01002695.1|_274_119	274	119	-	hypothetical protein				atggccgaggagcggatcggcgactacgccgcgatgttcgccacgcaactgcagcaggtccgagcgggagctggcgcaggtggtcgatgcgttcgtggccgcactacgggctggccctggagcgccgcccgcagccgcggcgcctggatgcgctga	MAEERIGDYAAMFATQLQQVRAGAGAGGRCVRGRTTGWPWSAARSRGAWMR
gi|348021367|gb|AGHY01002694.1|	fig|487527.6.peg.174	peg	gi|348021367|gb|AGHY01002694.1|_356_108	356	108	-	hypothetical protein				gtggtctacgtgccgcgctacgaccccgacgtggtctacggcgctccggtcaacgtctaccgcgaataccgctaccgtccgccgcgcccctactacgacaccggcgacctggttcaccgccggcatcatctccttcggcgtgggcgtgctggtcggcgacgcgctcgaacaccaccaccacagcgtgttcggctggctggaaccggcgccgccatggcacacgctggggctggaacaactggggggtga	MVYVPRYDPDVVYGAPVNVYREYRYRPPRPYYDTGDLVHRRHHLLRRGRAGRRRARTPPPQRVRLAGTGAAMAHAGAGTTGG
gi|348021375|gb|AGHY01002690.1|	fig|487527.6.peg.175	peg	gi|348021375|gb|AGHY01002690.1|_543_1	543	1	-	Beta-mannosidase (EC 3.2.1.25)		FIG00138182	ff	atggcctggacaccttcgccgaggtctatctcaaccggcaggaagctgctcgccgccgacaacatgttccggcagtggcgggtcgacgccaaaccgttgctcaagcgcggcgacaacgtgctggaagtgcgcatcgcctcgccgatcaagaagatccagccgtggctgtccaagcagccgtatgcgctgcccggcgcctacgactcggcgttcggcgacgaggccggtggcgcggcacagctccacctacgtgcgcaaggcgccgtacaacttcggctgggactggggcccgcgcatcgtcaccgccggcatctggcagggcgtgcgcctggaggcctgggacgacctgcgccgtggacggcctgcgcatcgcgcagcagcgcgtggacgccgacgcgg…	MAWTPSPRSISTGRKLLAADNMFRQWRVDAKPLLKRGDNVLEVRIASPIKKIQPWLSKQPYALPGAYDSAFGDEAGGAAQLHLRAQGAVQLRLGLGPAHRHRRHLAGRAPGGLGRPAPWTACASRSSAWTPTRRSCWRNCRWQAGRSGEVQLDLDVLGPDGPARRPVQPARGRSTRAPTP
gi|348021379|gb|AGHY01002688.1|	fig|487527.6.peg.176	peg	gi|348021379|gb|AGHY01002688.1|_996_259	996	259	-	FIG007317: hypothetical protein		FIG00007317	ff	atgcgccgcctgcaggtgcacaactggggcaccttcaacggcctgaccgacgtaccgatcgccgagaagggcttcctgttcgtcggccgctccggctcgggcaagtcgaccctggctcgatgcgatgtcggcgctgctgacgccgccgagcatcgtcgacttcaacgcccgccgcgcgcgaggccgagcgcagcgggccgcgaccgcagcctggtgtcctacgtgcgcggcgcctgggccgaccagcaggacagcgcctccggcgagatcgccacccagtacctgcgcaagggcgcgacctggtcggcgctggcgctggaataccgcaaacgcgcagggccaggcggtgagcctggtgcggctgttctggatcgccggcagcgggcaccgccgcggccg…	MRRLQVHNWGTFNGLTDVPIAEKGFLFVGRSGSGKSTLARCDVGAADAAEHRRLQRPPRARPSAAGRDRSLVSYVRGAWADQQDSASGEIATQYLRKGATWSALALEYRKRAGPGGEPGAAVLDRRQRAPPRPTCASTTWWCRAASTWPPNWTASTWTCAGSSCAWARTCTTSTASPGYAERFRHLLGIGNEMALRLLHKTQSAKNLGDLNAFLRVHARRAAHLRGGRPPGRGLRRTRWRPPRGG
gi|348021391|gb|AGHY01002682.1|	fig|487527.6.peg.177	peg	gi|348021391|gb|AGHY01002682.1|_364_167	364	167	-	PTS system, fructose-specific IIB component (EC 2.7.1.69) / PTS system, fructose-specific IIC component (EC 2.7.1.69)		FIG00001383	ff	gtggccgcgctgaaccgcgcgatcaagctgccgcgcaccctggagggcctgaagccggtgctgatcctgccggtgctgggcaccttgctggtcggcctggccatgctctacgtggtcggccagccggtggccgaactgctggccctggctcaccgagtggttgcgcggcatgcagggcagcaagcgcggggctgctag	MAALNRAIKLPRTLEGLKPVLILPVLGTLLVGLAMLYVVGQPVAELLALAHRVVARHAGQQARGC
gi|348021393|gb|AGHY01002681.1|	fig|487527.6.peg.178	peg	gi|348021393|gb|AGHY01002681.1|_143_709	143	709	+	Translation elongation factor P		FIG00000177	isu;Translation_elongation_factor_P_lysylation	atggccagctacggcatgaacgacgtcaagaacgggatgaagatcctggtcaacagcgagcctgcgatcatcaccgataccgaatacgtcaagcccggcaagggccaggcgttcacccgcgtcaagtaccgtttcatcaagtccgggcgcgtggtcgaaatgaccatgaaggcgaccgacagcgtggaagcggccgacgtggtcgacaccgacatgcagtacctgtacagcgacggcgagtactggcacttcatgcagcaggaaaccttcgagcaggtgcaggccgacaaggccggcgtcggcgacgccgccaagtggatcaagggcgaggaagattgcgtggtcacgctgtggaacggcacgccgatccaggtcaccccgccgaacttcgtcgaactg…	MASYGMNDVKNGMKILVNSEPAIITDTEYVKPGKGQAFTRVKYRFIKSGRVVEMTMKATDSVEAADVVDTDMQYLYSDGEYWHFMQQETFEQVQADKAGVGDAAKWIKGEEDCVVTLWNGTPIQVTPPNFVELKIVETDPGVRGDTSGGGGKPATLETGAVVRVPLFVGQEEVIRVDTRSGEYVSRVK
gi|348021399|gb|AGHY01002678.1|	fig|487527.6.peg.179	peg	gi|348021399|gb|AGHY01002678.1|_22_204	22	204	+	FIG01210211: hypothetical protein		FIG01210208	ff	gtgcagcacctggacctgcgccgcggcccgctggaacgcgccctgcgcctggccaccctggtggtgcacaccgccggcacccgccataccgcggtcgccgtgcccggcctggatcaggccgatgccgagcgcttacgcgagcgcctggcgcaccagctcgaccacgacgacgacgcgctgtga	MQHLDLRRGPLERALRLATLVVHTAGTRHTAVAVPGLDQADAERLRERLAHQLDHDDDAL
gi|348021399|gb|AGHY01002678.1|	fig|487527.6.peg.180	peg	gi|348021399|gb|AGHY01002678.1|_367_972	367	972	+	Possibly related to ydbT		FIG00031801	ff	gtgatgctggcggtgtgcagcgggctggtggcggtgtcgctgctgcgctatctaacctaccaataccgcatcggccgcgacagcctgagcatccgcagcggctggctggaacgcagcctgcgcgagatcccgttcgcgcgcatccacaacgtggtggtgcaccagtcgctgctgcaccggctgttcggcgtggccgaggtgcgcctggagtcggccggcggcacccaagcccgaggcgcagatgcgcgtgctgcggctggaccaggcgctggcgctggaacagcagatccgccaccgcgcgcccgccgccgacagtgccgccgtcgccgatgccagcgccgtccccgctgccgcgccggacagcgaactgctgctggccctgcctaccgccgaggtgct…	MMLAVCSGLVAVSLLRYLTYQYRIGRDSLSIRSGWLERSLREIPFARIHNVVVHQSLLHRLFGVAEVRLESAGGTQARGADARAAAGPGAGAGTADPPPRARRRQCRRRRCQRRPRCRAGQRTAAGPAYRRGAAPGADLQPRHGGAAHCVRRHLPPVSRAHDLQRDRALRAATVRLRHAPAVGLDGRHGHLRADAGERCCC
gi|348021407|gb|AGHY01002674.1|	fig|487527.6.peg.181	peg	gi|348021407|gb|AGHY01002674.1|_594_1055	594	1055	+	hypothetical protein				ttgatcgccgtcctcctggccctgagcgcgtgcgccagcgtcgcgccgtccacgccgaccgcgccgagcaaggtcagcgcgaccatgcagggcgatgcagcgcggccggcgcaggccagcggctgggtgcgcagcgagttgtacttcggcgtgggggaggagagcggcccggccgaccgcccgcaggccgagccgatcagcgaggcgcgctggcgcgcgttcctggacaaggaggtcacgccgcgctttcccgatggcctgaccgtgttcgatgcctacggccagtggctgttccgtggcgccaaggagccgaaccggctcaacaccaaggtgctggtgatcctgcacgaggacaccccgcagcgccgcgccgacatcgaggcgatccggctggcgtgg…	MIAVLLALSACASVAPSTPTAPSKVSATMQGDAARPAQASGWVRSELYFGVGEESGPADRPQAEPISEARWRAFLDKEVTPRFPDGLTVFDAYGQWLFRGAKEPNRLNTKVLVILHEDTPQRRADIEAIRLAWKQATGHQSVLWARQAVDVSF
gi|348021411|gb|AGHY01002672.1|	fig|487527.6.peg.182	peg	gi|348021411|gb|AGHY01002672.1|_262_53	262	53	-	hypothetical protein				gtgttcacccgccgcacctcgatgcccttgcgccgcgcgttctcctcgatctcctgcaggcgcggattcttgctgcccgcctccaccagcacctcgcgcacgttgtccgcgtcgttctcgatcgacgaggccacggcgttgacgccgacgatccactggttctgcttgctcatgaggcgggactacgcgaaaggaaagcgggcatggtag	MFTRRTSMPLRRAFSSISCRRGFLLPASTSTSRTLSASFSIDEATALTPTIHWFCLLMRRDYAKGKRAW
gi|348021419|gb|AGHY01002668.1|	fig|487527.6.peg.183	peg	gi|348021419|gb|AGHY01002668.1|_174_1	174	1	-	hypothetical protein				atgaagctgcgcgcggcggtgtcgccggtggtgttcgcgttgtgcatccccgtgggcatggtcgcgccctggctgggccgcgtcggcttcctggcgatcttcctgctgcagtggggggcgatgcgcgtgtaccagcggcgcatccgccaggcccaggcggcaccggcaccgtga	MKLRAAVSPVVFALCIPVGMVAPWLGRVGFLAIFLLQWGAMRVYQRRIRQAQAAPAP
gi|348021425|gb|AGHY01002665.1|	fig|487527.6.peg.184	peg	gi|348021425|gb|AGHY01002665.1|_38_352	38	352	+	quinone oxidoreductase				gtggcgcagatcgccaggctgcgtggggcgaaggtgatcgccatcgccgggggcgcggagaaatgccgctacctgcgcgaggaactgggcgtggacgtggccctggaccaccgcgccaaggacttcgccgagcagatgcggcgccgccgcgagcgacggcatcgacgtgtacttcgagaacgtcggcggccacgtgttcgatgccgtgctgccactgctcaacgacttcgcgcgggtgccggtgtgcggcaccatcgccacctacaacgccaacggcgccccgccgccggggccggagccggctgccggcgctga	MAQIARLRGAKVIAIAGGAEKCRYLREELGVDVALDHRAKDFAEQMRRRRERRHRRVLRERRRPRVRCRAATAQRLRAGAGVRHHRHLQRQRRPAAGAGAGCRR
gi|348021427|gb|AGHY01002664.1|	fig|487527.6.peg.185	peg	gi|348021427|gb|AGHY01002664.1|_26_847	26	847	+	DNA recombination protein RmuC		FIG00000595	isu;DNA_repair,_bacterial	atgcagcagctggccaccggcgtcggcgacctcaagcgcgtgctgagcaacgtcaagaaccgcggcggctggggcgaggtgcagctggagaacatccttgagcagaccctgacccaggagcagtacgcgcgcggcgtgcgggtgcgcccggagcgcaacgagatggtcgatttcgccgtgcgcctgcccggccgcggccacgaggacacgccggtgtggctgccgatcgacgccaagttcccgcgcgaggactacgagcgcctgctcgatgcgcaggagcagggcgacccggagctggtgcaggcgacgggggcgcagctggagcgcgcgatccgggtccaggccaagtcgatctgcgacaagtacatcgccccgccgcacaccaccgacttcgcggtg…	MQQLATGVGDLKRVLSNVKNRGGWGEVQLENILEQTLTQEQYARGVRVRPERNEMVDFAVRLPGRGHEDTPVWLPIDAKFPREDYERLLDAQEQGDPELVQATGAQLERAIRVQAKSICDKYIAPPHTTDFAVMFLPTEGLYAETLRRPGLADLLQREHRIVVAGPTTITALLNSLQMGFRTLAIEKRSSEVWGVLAAVKSEFGKFAGILEKAEKQISTVGKSLGEASRKTRTIERRLRGVETLADAQAAPLLELSLPLDEAEADEPAGDDGQ
gi|348021433|gb|AGHY01002661.1|	fig|487527.6.peg.186	peg	gi|348021433|gb|AGHY01002661.1|_66_1190	66	1190	+	Glutathione reductase (EC 1.8.1.7)		FIG00000841	isu;Glutathione:_Redox_cycle	gtgcgccgtgagcgggccgatccgcgattacgacctgctggtgctgggcggcgggttccggtggcctggccactgcgttccgcgccgccagccatggccgcgcgggtggcgatcctggagccgagcgcgctcggtggcacctgcgtcaatgtcggctgcgtgccgaagaaagcgatgtggctggcggcggacctggtcgagcgcatcgacctggcgcgtgcggtcggtttcgccattcccgaggccacgctgtcgtgggcggaactggtggcgcatcgccagggctacatcggcaacatccacgccagctaccggcggcgcctggatgccgatggcgtggtgctgatcccgcggcgcggccggctggtcgatgcgcacaccgtcgaatgcgacgacggc…	MRRERADPRLRPAGAGRRVPVAWPLRSAPPAMAARVAILEPSALGGTCVNVGCVPKKAMWLAADLVERIDLARAVGFAIPEATLSWAELVAHRQGYIGNIHASYRRRLDADGVVLIPRRGRLVDAHTVECDDGVRVSANHVVIATGAHPLRPQIEGADLGLVSDDFFNLCEAPPRVAIVGGGYIAVELAGLLQALGSRGGAVRAGRAPAGAVRRGTGATARRQPSPPGRAPAFRLSRQRPAPQRRGPVRGRRAGTAGRQRRQGVLRHRAPPQYPRPGPGSAGRAPGRQARDRGGRLPEHRRAGAVRDRRRCRQGRPDPGGDRRRAQADGPRVRRPAAGATGLRERAQRGVFAFRRWARWGWARSRRASAMAPTR
gi|348021439|gb|AGHY01002658.1|	fig|487527.6.peg.187	peg	gi|348021439|gb|AGHY01002658.1|_208_510	208	510	+	hypothetical protein				gtgccggccgatgcgatcctgatcgagacggtgtcgcgcaccacccggcagaacctgatcgaggcgcggcggctgatgcgcgaacacggcctgcaccgggccatcgtggtcagcgatccgctgcacatggcgcgggcgctgcggctgtgccaggaactgcagatcgacgcgctggcctcgtcgaccccgagcagccgcttccgcagcttccagacccgctggcgcttcctgctgcaggagctgtacttcttccatcgcgacctgctggagcggggcgtcgagcacggcggcgagaccgtatga	MPADAILIETVSRTTRQNLIEARRLMREHGLHRAIVVSDPLHMARALRLCQELQIDALASSTPSSRFRSFQTRWRFLLQELYFFHRDLLERGVEHGGETV
gi|348021439|gb|AGHY01002658.1|	fig|487527.6.peg.188	peg	gi|348021439|gb|AGHY01002658.1|_542_970	542	970	+	Isopropylmalate/homocitrate/citramalate synthases		FIG01031554	ff	atgagcaaccacggagttcctgggcaggaccagtccatcgccctggtccaggcctattacgccgcgttcaaccgcggcgactgggacggcatgctgggcatgctcagcgacgacgtcgcccacgatctcaaccagggcgcgcgcgagaccggcaaggacgcgttcgccgccttcctgcagcgcatgaacgccagctaccgcgagcagttgcacgacatcgtggtgctggccgcgcaggacggccgccgcgccgccgccgagtacgtggtgcatggcgaataccaccacaccgataccggcctgccggaggcgcgcggccagcgctacgtgctgccgggcggggcgttcttcgatatccgcgacggcaagatcgcccgcgtcagcaactactacaacctc…	MSNHGVPGQDQSIALVQAYYAAFNRGDWDGMLGMLSDDVAHDLNQGARETGKDAFAAFLQRMNASYREQLHDIVVLAAQDGRRAAAEYVVHGEYHHTDTGLPEARGQRYVLPGGAFFDIRDGKIARVSNYYNLEDWIAQVSA
gi|348021439|gb|AGHY01002658.1|	fig|487527.6.peg.189	peg	gi|348021439|gb|AGHY01002658.1|_1123_1293	1123	1293	+	hypothetical protein				gtggcgctgctggcctgcacgctcgcgctggccctgctgggtgcccgcgggatctgggacgccgacgaaggccgttacaccaatgtcgcgctgaacatgctgcacagcggtcgactggctcacgccacggcgcagccgaggacgtggcgcactggaccaagccgccgctga	MALLACTLALALLGARGIWDADEGRYTNVALNMLHSGRLAHATAQPRTWRTGPSRR
gi|348021443|gb|AGHY01002656.1|	fig|487527.6.peg.190	peg	gi|348021443|gb|AGHY01002656.1|_833_615	833	615	-	hypothetical protein				gtggtgtatctgttcgcgccggcgctatggctgctgatcggcgcagtggcgtcggcggcgcaggccgatccgcacggtgcggcgcagtggcagcgcgacatggccgagcaggcgcggcacagcgccgcggcgctggcgcaggcagcgcgaggtgttcggccacggcagttacgtccaggccacccgcgcaacgtgcgcgcgacctggtcgaatcgctga	MVYLFAPALWLLIGAVASAAQADPHGAAQWQRDMAEQARHSAAALAQAARGVRPRQLRPGHPRNVRATWSNR
gi|348021445|gb|AGHY01002655.1|	fig|487527.6.peg.191	peg	gi|348021445|gb|AGHY01002655.1|_665_222	665	222	-	Mn-dependent transcriptional regulator MntR			ff	atggcgccgacggcggtgctgctcgacgccgaggtgcaggtcgaaagcttccgccaggtgcgtgaagcgcaccgcctggagctgatcgaggactacgtggagttgatttccgacctgctcgccgatggcggcgaagcgcggcaggtggatatcgccgcgcgcctgggcgtggcccagccgaccgtggccaagatgctcaagcgcctggtcaagggtggctgggtggtgcagcgtccgtatcgtggcgtgttcctgaccgccgagggcgaggcgttggccgccgccagccggcagcgccaccagaccgtggagcagttcctgctggccctggggatcgatcccgacaccgcgcgccgcgacgccgagggcatcgagcaccatgtcagcgaagcgacgctg…	MAPTAVLLDAEVQVESFRQVREAHRLELIEDYVELISDLLADGGEARQVDIAARLGVAQPTVAKMLKRLVKGGWVVQRPYRGVFLTAEGEALAAASRQRHQTVEQFLLALGIDPDTARRDAEGIEHHVSEATLAVFAEFVRKHSAPR
gi|348021455|gb|AGHY01002650.1|	fig|487527.6.peg.192	peg	gi|348021455|gb|AGHY01002650.1|_234_566	234	566	+	hypothetical protein				atgacctctcccgctttccccaccgcctccggcgcgctgacgctgcaaggccccgccggcccgatcgaggccgcggtcgatctgcccgacgccgacgtcgccgcgctgccggtcaccgccatcgtctgccatccgctgtccaccgagggcggcagcatgcacaacaaggtggtgaccatggtcgcgcgcgcgttgcgcgaactggggcgtgcacgtggtgcgcttcaatttccgcagcgtcggcgcctccgccggcagcttcgaccacggcgatggcgagcagcaggatctggccgcggtggccgcctgggtgcgcgcgcaacgtccgcatga	MTSPAFPTASGALTLQGPAGPIEAAVDLPDADVAALPVTAIVCHPLSTEGGSMHNKVVTMVARALRELGRARGALQFPQRRRLRRQLRPRRWRAAGSGRGGRLGARATSA
gi|348021461|gb|AGHY01002647.1|	fig|487527.6.peg.193	peg	gi|348021461|gb|AGHY01002647.1|_1688_327	1688	327	-	LigA				atgctcggctatgcccggcgacgccccggccgacggcctgaacgcgctgctgccgctggtccacggcgacgaccaggagcgcctgcgccaggcgatccgcacgcatttcgagggccgcaccgaaacctacatgtgcgagttccgcctgcgccggcaggacgggcagtggcactggatcctggaccgcggccgcatcgtcgcgcgcaccgccgacggcagcccgctgcgcatgatcggcacgcacaccgacatccacgagcagaagctgctcgagcagcgcctgcgcgaccagcagaccctgctgcgcgaggcgcagcgcatgacccgcatgggcagctggtcctgggacccgctgggcgaccgggtatggtgctcgcgcgagttcctgcgcgtcaccgg…	MLGYARRRPGRRPERAAAAGPRRRPGAPAPGDPHAFRGPHRNLHVRVPPAPAGRAVALDPGPRPHRRAHRRRQPAAHDRHAHRHPRAEAARAAPARPADPAARGAAHDPHGQLVLGPAGRPGMVLARVPARHRPGRTTGAEQPWLAAPAQPRFAGAAGLDLAAHGARGQAGQFRGRAGAWQRVAAAPAGVGAAAGGGRWPHPARARPGAEHHRAAPDRRADPLAHRTAQPRFGAGQDRWLRDRGRYPAHAMDRGVLPHPWPAQGGHRPGPRAGAVHPGLARCVRVGAGAHRRGRPAGAVGPVLPPPVRAAHLGAGTDRTGRARRPAAALRGAVPRHHPRARGQRAHRVAGPLRPADRPAEPATAARAGREGDARCGGARHHAGDAVRRPGRLQEHQRFL…
gi|348021461|gb|AGHY01002647.1|	fig|487527.6.peg.194	peg	gi|348021461|gb|AGHY01002647.1|_1854_1648	1854	1648	-	hypothetical protein				gtgacgacagcggcggcctgctgggcctacaccctcagcgtgcccgaaccggtcggcagcgacggcgccacccgctgggagatcgccctggacagcgccgagcacggcctggtgggactgggacatccccagcgacaccattttccgctccgagcgctggaaacgcatgctcggctatgcccggcgacgccccggccgacggcctga	MTTAAACWAYTLSVPEPVGSDGATRWEIALDSAEHGLVGLGHPQRHHFPLRALETHARLCPATPRPTA
gi|348021469|gb|AGHY01002643.1|	fig|487527.6.peg.195	peg	gi|348021469|gb|AGHY01002643.1|_404_24	404	24	-	Outer membrane component of tripartite multidrug resistance system		FIG00004305	isu;Multidrug_Resistance,_Tripartite_Systems_Found_in_Gram_Negative_Bacteria	atgcgcagtacgacctggcggtggccaactacaaccaggaccctggtggcggcgttgcgcgaggtggccgaccaggtcaacgcggcgcgttcgctggccgagcaggcgcagcagcaggcgcaggcgctggagaccgcgcaggccgccttcgacctgtcgcagcagcgctaccgcgccggcatcggcaactacctggacgtgctcagcgcgcagcagcagttgctcgacgcgcagcagcgcctggctgccctgcaatccaatcagatcctagtctcggtgcgcctgaatcaggcgctgggcgggcggctacgacgccacctccgccgccgacgcgccgagctcttcttccgcaccttcgcattcctgagatcgctgcaatga	MRSTTWRWPTTTRTLVAALREVADQVNAARSLAEQAQQQAQALETAQAAFDLSQQRYRAGIGNYLDVLSAQQQLLDAQQRLAALQSNQILVSVRLNQALGGRLRRHLRRRRAELFFRTFAFLRSLQ
gi|348021475|gb|AGHY01002640.1|	fig|487527.6.peg.196	peg	gi|348021475|gb|AGHY01002640.1|_18_308	18	308	+	putative sugar transporter component				atgcacgacgccgacgcgttcgtggtgcagatcctgctcgcggccaccgccacggtgatgttcgcgttcggatcgcgcatctccgcggcctgccggcacatgcgcgacgacgggcgcatgcgcgagcaggcgctggccttcgcgcaggccgggtacctgtcggccgaacgcacgctgcgccggcgggtggtcgactacaccgacctcagcacccagatcaaacaagctgcgccgcgacgtggtggaagacctgcgcgcgcgcgggccattacgccgccgccatgcagatga	MHDADAFVVQILLAATATVMFAFGSRISAACRHMRDDGRMREQALAFAQAGYLSAERTLRRRVVDYTDLSTQIKQAAPRRGGRPARARAITPPPCR
gi|348021485|gb|AGHY01002635.1|	fig|487527.6.peg.197	peg	gi|348021485|gb|AGHY01002635.1|_348_190	348	190	-	Free methionine-(R)-sulfoxide reductase, contains GAF domain		FIG01304169	isu;Methionine_sulfoxide_reductases isu;CBSS-393130.3.peg.794	atgccgcctcgcgttcggaactggtggtgccgctgctgcgcgacagcgcgctggtcgggcgtattcgacctggacagtcccgacctggcccgcttcgacgccgacgaccagcgcgggctggaagcgatcgcccaggtcttcgtcgacagcctgcgatga	MPPRVRNWWCRCCATARWSGVFDLDSPDLARFDADDQRGLEAIAQVFVDSLR
gi|348021487|gb|AGHY01002634.1|	fig|487527.6.peg.198	peg	gi|348021487|gb|AGHY01002634.1|_99_323	99	323	+	hypothetical protein				ttgctgttctcgcgcgaccaggcgcacaagcgctacgtgcaggacgggctgcgcgaggccgccgacacgctgcgcgcctgggtggcgcgtggcgccaccgtgtatgtgtgcggcagcctgcagggcatggcgcgcggcgtggataatgcgttgcgcgagatccttggcgaggacgcgctggatgcgctcagcgccgaagggcgctaccgacgcgatgtgtattga	MLFSRDQAHKRYVQDGLREAADTLRAWVARGATVYVCGSLQGMARGVDNALREILGEDALDALSAEGRYRRDVY
gi|348021491|gb|AGHY01002632.1|	fig|487527.6.peg.199	peg	gi|348021491|gb|AGHY01002632.1|_387_55	387	55	-	Sulfur carrier protein adenylyltransferase ThiF		FIG00001002	ff	gtgttcgacgccggccgccggcgtgggcaggcaccgtgctaccgctgcctgttcccggagccgccgccgccggagttcgcaccgaactgcgccgatgcgggcgtcctcggcgtgctgcccggcatcgtcggtctgctgcaggccaatgaggtcttgaagctgctgctggacatcggcgaaccgctgcgcggccgcctgctgcatttcgacgcgctggcgatgcgcttccgcgaaacccgcctgtccgccgatcctcagtgcccgctgtgcgcgccggaccggccgtttccaggctatatcgactatgcacagttctgtggcgctgagccttag	MFDAGRRRGQAPCYRCLFPEPPPPEFAPNCADAGVLGVLPGIVGLLQANEVLKLLLDIGEPLRGRLLHFDALAMRFRETRLSADPQCPLCAPDRPFPGYIDYAQFCGAEP
gi|348021503|gb|AGHY01002626.1|	fig|487527.6.peg.200	peg	gi|348021503|gb|AGHY01002626.1|_587_339	587	339	-	hypothetical protein				gtgccgaccggcctggccgcggccacgcgcgccagcaacgccatcaccctgagctggaatgcccgccgccgacaatgccggcggcagcggcctggccggctacgacatcctccgcaacggcaaccgcgtgggcacctccaccaccaccgcctacaccgattcggcgctggaccgccgacaccgcgtacgcctacgcggtccgcgcccgcgacaacgccggcaacgtctccgccagcagcgccacgctaa	MPTGLAAATRASNAITLSWNARRRQCRRQRPGRLRHPPQRQPRGHLHHHRLHRFGAGPPTPRTPTRSAPATTPATSPPAAPR
gi|348021511|gb|AGHY01002622.1|	fig|487527.6.peg.201	peg	gi|348021511|gb|AGHY01002622.1|_842_93	842	93	-	Phosphoglycerate mutase (EC 5.4.2.1)		FIG00005840	isu;Phosphoglycerate_mutase_protein_family	gtgacccgcaaactcgtactgttgcgccatggccagagccagtggaacctggataaccgcttcaccggctgggtcgacgtggacctgaccgagcagggccgccaggaagccgtggccgccggccggctgatgcgcgaggagggcctgcagttcgacgtcgcccatacctccgtgctcaagcgcgccattcacaccctgcagggcgcgctgaaggaactggaccaggattggctgccggtgcacaagagctggcgcctcaacgagcgtcactacggcggcctgcagggcctggacaaggccgagaccgcggccaagcacggcgaggaccaggtcaagatctggcgccgctcctacgacatcccgccgccgccgatggacgccgaggatccgggccatccg…	MTRKLVLLRHGQSQWNLDNRFTGWVDVDLTEQGRQEAVAAGRLMREEGLQFDVAHTSVLKRAIHTLQGALKELDQDWLPVHKSWRLNERHYGGLQGLDKAETAAKHGEDQVKIWRRSYDIPPPPMDAEDPGHPLHDRRYATLDRNALPATESLATTLERVLPYWHDAIAPQLKAGQTVLVTAHGNSLRALYKYLNDVSREEILELNIPTGIPLLFELDDTLQVQSYRYLGDPEAAKKAAEAVANQGKAK
gi|348021515|gb|AGHY01002620.1|	fig|487527.6.peg.202	peg	gi|348021515|gb|AGHY01002620.1|_705_58	705	58	-	Predicted sucrose-specific TonB-dependent receptor		FIG00137261	idu(1);Sucrose_utilization	gtgctggagttcggcgacatcgccttcggcaacgccgacatcttcctgcgcgccgactacagcctggagcgcatcgaggccatccgcggcggctctgcctccaccttcgccagcaactcgccgggcggcatcatcaacttcatcagcaagaccggcgacaccgccggcggcagcgtcggcctcacccgcgggctgggcggctacgacaacacccgcctggacttcgactacggcgcgccgttcgccgaacactggcagttcaacgtcggcggcttctaccggcgtggcgacggcgtgcgcgacgccggctacaccaccgacaagggcggccagctcaaggccaacctgacccggctgttcgacaacggctacgtgcgcgtctacgccaagtacctcaac…	MLEFGDIAFGNADIFLRADYSLERIEAIRGGSASTFASNSPGGIINFISKTGDTAGGSVGLTRGLGGYDNTRLDFDYGAPFAEHWQFNVGGFYRRGDGVRDAGYTTDKGGQLKANLTRLFDNGYVRVYAKYLNDRAAGYLPVPTRVSGRDGSPALRQHRRFRPRHRHAVQPVLPQQRHPRRRQQTLARGTRRRHASAVARVSAPRRSSMSAAAGP
gi|348021523|gb|AGHY01002616.1|	fig|487527.6.peg.203	peg	gi|348021523|gb|AGHY01002616.1|_205_77	205	77	-	hypothetical protein				gtgctgctggcgctggtgcaggacctggcggacgccaaactggaagcactgcgcactttggcagatcggggcctggatgcgactggccgcttcgttggtaggcaggcagcctgggaggcggtgccgtag	MLLALVQDLADAKLEALRTLADRGLDATGRFVGRQAAWEAVP
gi|348021523|gb|AGHY01002616.1|	fig|487527.6.peg.204	peg	gi|348021523|gb|AGHY01002616.1|_825_403	825	403	-	Methyl-directed repair DNA adenine methylase (EC 2.1.1.72)		FIG00001562	icw(1);DNA_repair,_bacterial	gtgacctcacagacgttcggtacggccgcgcgatcgcccaaaaccatcaacctgctgcgcctggaggaagatctaagcgcagcgcatttgcggctgcaccgggtcgtggtggagcaactcgggtgggaggcttgcctgtccaagtacgacacgcccgagactctgttctttttggacccgccgtactggcaaacggagggctacggtggcgccttcgcgctcgatgagtacgaccgcctggccgaggcgatgtccggcctacaggggcgcgcgatcctgacaatcaacgaccatcccgacatgcgcgctcgcttcgacaaattccacggcaaaacggtgagaatcgactacaccatcggccgccagtcagcagccaggaaggagcggatttacaccaca…	MTSQTFGTAARSPKTINLLRLEEDLSAAHLRLHRVVVEQLGWEACLSKYDTPETLFFLDPPYWQTEGYGGAFALDEYDRLAEAMSGLQGRAILTINDHPDMRARFDKFHGKTVRIDYTIGRQSAARKERIYTTWRASRRR
gi|348021523|gb|AGHY01002616.1|	fig|487527.6.peg.205	peg	gi|348021523|gb|AGHY01002616.1|_1139_822	1139	822	-	Methyl-directed repair DNA adenine methylase (EC 2.1.1.72)		FIG00001562	icw(1);DNA_repair,_bacterial	ttgctgcagcacctgctgccgctgctctctgaaaacccgcatcaaacctacgttgaagcgttcgccggcggcgccgccctgctgttcgcccgcgagccggcgaacgtcgaagtgatcaacgacgtgcacggcgagctggtgcgcctctatcgcgttgtggccaaccacctggacgagttcatgcgccagttccgttgggcgctgacgagccgcgaaatgttcaagtgggcgcagctccagcaccctgacacgctcacggacatccagcgtgcggctcggtttttctacctgcagcgcttgtcctttggcgggaggtga	MLQHLLPLLSENPHQTYVEAFAGGAALLFAREPANVEVINDVHGELVRLYRVVANHLDEFMRQFRWALTSREMFKWAQLQHPDTLTDIQRAARFFYLQRLSFGGR
gi|348021523|gb|AGHY01002616.1|	fig|487527.6.peg.206	peg	gi|348021523|gb|AGHY01002616.1|_1517_1326	1517	1326	-	hypothetical protein				atggattgggacaaactggtgtacgcgctttccgcaagcgcacgcgtcgccgcgctcctgcgttgggacgacgcggcggagcttcatcgcacggccgtttatggcactgcggccgccgcggcgatcacccaccgagcaggcccaatgttcaacaccgagcagtggacattcgaggagatccctccgatctaa	MDWDKLVYALSASARVAALLRWDDAAELHRTAVYGTAAAAAITHRAGPMFNTEQWTFEEIPPI
gi|348021523|gb|AGHY01002616.1|	fig|487527.6.peg.207	peg	gi|348021523|gb|AGHY01002616.1|_4090_1550	4090	1550	-	hypothetical protein				atggcgcgccagtacgcacgctgggccacgagtccgatcggcctgggcctgctggtcgaggatggtggcttgacgctggccaccgccggcagcacgacgttgaaccccccgcgccgcagcacgatcgcgcacgctgaaggtacccacggcgtcgagttcttcctgtggggcgatggaaccgtgcaggcgacgattggcgtcgtgtcgcccgcagcaccgctttcagccgaggtcggctacgcgaacggcataggctggcgcctgtatgacggcgtcatcgtgcgcaatggcacggtcgtggcgagtggcctggcgatgccatcccgaggcgaagccctgggcgtccgcgtcgtcctcggtgcgccatcggtcgtggagttctaccgtggcggcatcaag…	MARQYARWATSPIGLGLLVEDGGLTLATAGSTTLNPPRRSTIAHAEGTHGVEFFLWGDGTVQATIGVVSPAAPLSAEVGYANGIGWRLYDGVIVRNGTVVASGLAMPSRGEALGVRVVLGAPSVVEFYRGGIKVASQEITLAGGVHFAASLATDDAAGLRCAINAGQWQGLSAAVGAGWYGTDAAADALHLSSEDYMTGSADVPASTPYLGLLASDGISTVASVSFWPWDTTSRSGAAQMRVLDAGGALDAAALGALRNQPVRVRQVDQGAPLSTATAVARYVLDRIDIEDDGTKALVLRDAHDDLDDPLSRAVFLPPQGASNAWQSQPVIIGAVRSAPGISVNSDGSQQWLCEAPLGSVGAVLDRGASLAAGTAYSLAGDGQQIVLTSPPVGPLVADV…
gi|348021531|gb|AGHY01002612.1|	fig|487527.6.peg.208	peg	gi|348021531|gb|AGHY01002612.1|_780_418	780	418	-	Glycosyltransferase (EC 2.4.1.-)		FIG00675740	ff	gtgcacgtgccgcggcggccgtatgtgcgcgcgctgcccggcatccccacgatccgcgtgttcgaggcgctggcctgtggcatcccgctggtgtgtgcgccgtgggacgacgtcgagcagttgtttacgcccgggcgcgattacctggtggcgcgcgacggcgtgcagatgcagcgccacctgcacgacgtgctgcacgacgccgaactggccgcggcgctgcgcatgcatggcctgcataccatccgcacccgccacagctgcgcgcaccgcgtcgacgaactgctggcggtgctcgccgaactcgacgcgcccagcccgcgcgccacgcttcccgacgaacggagcctccgtcatgcctag	MHVPRRPYVRALPGIPTIRVFEALACGIPLVCAPWDDVEQLFTPGRDYLVARDGVQMQRHLHDVLHDAELAAALRMHGLHTIRTRHSCAHRVDELLAVLAELDAPSPRATLPDERSLRHA
gi|348021537|gb|AGHY01002609.1|	fig|487527.6.peg.209	peg	gi|348021537|gb|AGHY01002609.1|_593_108	593	108	-	Single-stranded-DNA-specific exonuclease RecJ (EC 3.1.-.-)		FIG00060517	isu;DNA_Repair_Base_Excision isu;DNA_repair,_bacterial_RecFOR_pathway	ttgcgcggctcggcgcgttcgattcccgggttccacatccgcgatgcgatggcggcggtggaggcgcagcggccggggctgatggagaagttcggcggccatgccatggccgcgggcctgagcctgccccaggacgcactggccgagttcgaacaggtgttccgcgcgcacgcgctggccagcctggacgcggaactgctgcaggccgagttgctcagcgacggtgcgctggatccgcacgaactcgaccatcgccatgccgaggcgttgcgccagggcggggccgtgggggcagggctttccggagccgctgttcgacggcgaattcgaggtagtgcagtggcgcgtgctgaaggaacgccacctcaagctgagcctgcgctgccccggccgcgccga…	MRGSARSIPGFHIRDAMAAVEAQRPGLMEKFGGHAMAAGLSLPQDALAEFEQVFRAHALASLDAELLQAELLSDGALDPHELDHRHAEALRQGGAVGAGLSGAAVRRRIRGSAVARAEGTPPQAEPALPRPRRALERDPLQRLARPRTRSSRAYRLSPCCG
gi|348021543|gb|AGHY01002606.1|	fig|487527.6.peg.210	peg	gi|348021543|gb|AGHY01002606.1|_445_38	445	38	-	FIG01212390: hypothetical protein		FIG01212388	ff	atgaccaccgcgatcgtgctcaaaccggatttcggcggcaccctcagcttcggcgcgctgcgcgtggccggcaccttcgccgggctgctgctggccaccgtgctggcgcacttcgtgatggacggggcggtggtgcggctgctgttgctgaccgtgttctgcctgggcttccgcctgctgacccaaggtcaactacgggctcggcgtggcctgcctgaccggcatgctggtgctgctgctgtcgttcgagggcatggccccgggcgaggcgatcggcgagcgcatccaggccaccgtgctcggcagcgcgctggcgctggcggcctatgcgctgtggccgacctgggaacgcaagccacatccgcgccatcctcgcgcagttgctgctcgcctatcgcg…	MTTAIVLKPDFGGTLSFGALRVAGTFAGLLLATVLAHFVMDGAVVRLLLLTVFCLGFRLLTQGQLRARRGLPDRHAGAAAVVRGHGPGRGDRRAHPGHRARQRAGAGGLCAVADLGTQATSAPSSRSCCSPIATI
gi|348021545|gb|AGHY01002605.1|	fig|487527.6.peg.211	peg	gi|348021545|gb|AGHY01002605.1|_318_13	318	13	-	Twin-arginine translocation protein TatB		FIG00000670	icw(1);Twin-arginine_translocation_system	gtgttcgatatcggattcagcgaactgctggtgatcgcggtggtggccctggtggtgctcggccccgagcgcctgcccaaggcggcgcgctttgccgggttgtgggtgcgtcgcgcccgcgcgcagtgggactcggtgaagcaggaactggaacgcgaactggaagccgaggaactcaagcgcagcctgcacgaccgtgcagagttcgctgcgccaggccgagacccagtttcgcgacggcagcgaggaacctgcaccggcagaccgaggcactgcgccgcgagatcgatccgaacccgccggtag	MFDIGFSELLVIAVVALVVLGPERLPKAARFAGLWVRRARAQWDSVKQELERELEAEELKRSLHDRAEFAAPGRDPVSRRQRGTCTGRPRHCAARSIRTRR
gi|348021545|gb|AGHY01002605.1|	fig|487527.6.peg.212	peg	gi|348021545|gb|AGHY01002605.1|_534_334	534	334	-	Twin-arginine translocation protein TatA		FIG00138313	isu;Cluster-based_Subsystem_Grouping_Hypotheticals_-_perhaps_Proteosome_Related isu;Twin-arginine_translocation_system	gtggtgctggtgatcgtgctgctggtgttcggcaccaagcggctgacgagcggcgccaaggatctgggcaacgcggtcaaggaattcaagaaaggcatgcgcgacgaggacaagccggccggccagctcggcgacgagacgcgcagcagcagcgagccgtcccgccagacccaggccgagcgcgaccgcgacgcgcactga	MVLVIVLLVFGTKRLTSGAKDLGNAVKEFKKGMRDEDKPAGQLGDETRSSSEPSRQTQAERDRDAH
gi|348021549|gb|AGHY01002603.1|	fig|487527.6.peg.213	peg	gi|348021549|gb|AGHY01002603.1|_276_614	276	614	+	3-demethylubiquinone-9 3-methyltransferase (EC 2.1.1.64)		FIG00030029	ff	atggagatgctcgagcacgtgcccgatccggcggcgatcgtgcgcgcttgcgcgaccctgctcaagccgggcggacagctgttcctgtccaccctcaaccgcaccccggccgcgttcgccctggccatcgtcggtgccgagtacgtggcgcggctgttgcccaccggcacccaccgctaccaggatttcatcaagccggcggaactggccgcctggttgcgccaggccgagctgcagctgcgcgacgtcagcggcctggcctacgagccgtggcgcaaccgcgcacggctgtcctcgcggaccgaggtcaattacctggcatgtgcggggaagccgtga	MEMLEHVPDPAAIVRACATLLKPGGQLFLSTLNRTPAAFALAIVGAEYVARLLPTGTHRYQDFIKPAELAAWLRQAELQLRDVSGLAYEPWRNRARLSSRTEVNYLACAGKP
gi|348021551|gb|AGHY01002602.1|	fig|487527.6.peg.214	peg	gi|348021551|gb|AGHY01002602.1|_278_69	278	69	-	Histidyl-tRNA synthetase (EC 6.1.1.21)		FIG00000087	isu;tRNA_aminoacylation,_His	gtgcagatggagccgaagaagatcggcaagcagttccagtacgcggcccgcgccggcatccgcttcgtggtgctggccggcgacgacgaactggcgcgcggtgtggtcgcggtcaaggacctgctgcgcgagcagcagttcgaggtcgcccgcgacgaactggccagcacgctgcaggtggaactggagcaggccaaggtgatggcctga	MQMEPKKIGKQFQYAARAGIRFVVLAGDDELARGVVAVKDLLREQQFEVARDELASTLQVELEQAKVMA
gi|348021557|gb|AGHY01002599.1|	fig|487527.6.peg.215	peg	gi|348021557|gb|AGHY01002599.1|_256_80	256	80	-	Beta-glucosidase (EC 3.2.1.21)		FIG01290319	idu(5);Fructooligosaccharides(FOS)_and_Raffinose_Utilization idu(5);Beta-Glucoside_Metabolism	gtgcggctggcggcgggcgagggcatggaggtcagcttcaccctcgaccgccacgcgctggccttcaccggccgcgacggacagtgcacggccgagccgggcatgttcgacctgtgggtgtgcgcgtcctcggccagtggcgagcccgtggccttcgagctgctgccgcagggctga	MRLAAGEGMEVSFTLDRHALAFTGRDGQCTAEPGMFDLWVCASSASGEPVAFELLPQG
gi|348021559|gb|AGHY01002598.1|	fig|487527.6.peg.216	peg	gi|348021559|gb|AGHY01002598.1|_1002_475	1002	475	-	PnuC protein				gtggctgaccgcgcggcgagtgcgctggtgctggccggtcaacgtggtcgcggtgctgctgtacgcgtgggctgttctatcagtggaagctgtactcggacatgctgctgcagggcctgtacgtggtcctgcagggctacggctggtggcgctggagcaaagggctcggcgacgacggcaaggtccaggtcgggccgctgccctggggccgaaggcctgcgctcggtgctggccggcgccgccggcgcggtgctgctgggctggtggatgcaccggcacaccgatgcggcgctgccgtggctggatgccgcgctgtcggcattcagcgtggtcgccagcgtctgggccgcgcgcaagcgcatcgccaactggggcctgtggatcgtgctggactgcgtc…	MADRAASALVLAGQRGRGAAVRVGCSISGSCTRTCCCRACTWSCRATAGGAGAKGSATTARSRSGRCPGAEGLRSVLAGAAGAVLLGWWMHRHTDAALPWLDAALSAFSVVASVWAARKRIANWGLWIVLDCVYVGVFLYKGLYPTAALYAGFVVWRCTDCACGRRISRRARAIS
gi|348021569|gb|AGHY01002593.1|	fig|487527.6.peg.217	peg	gi|348021569|gb|AGHY01002593.1|_536_294	536	294	-	hypothetical protein				atgcgcggccgcgccctggcggtgatcggcttcgccacgccggacagtgccaaccgcctgtacccgaccatcgccagcaacgaccgcgccgacgtggtcgccgcgtacctggtgcaacgcggcgtcgcggtggagcgcgtgcgcggcctcggcgcagtgcgtccgctgcttggcggcgaagacgccgcagccaaggcccgcaacgagcgcgtcgagctttggctgctggatcgggcgcggtag	MRGRALAVIGFATPDSANRLYPTIASNDRADVVAAYLVQRGVAVERVRGLGAVRPLLGGEDAAAKARNERVELWLLDRAR
gi|348021583|gb|AGHY01002586.1|	fig|487527.6.peg.218	peg	gi|348021583|gb|AGHY01002586.1|_30_179	30	179	+	hypothetical protein				gtgttgccggtcgagcgcgacggcgtgcaggtgttgccgttgcagccgcggctgcagcgtcgcttcgcgctggtcggccgcggcgcacccggcaccggctgcgctgcaattgcgcgggttcttggacgaggccatcagcgcagctactga	MLPVERDGVQVLPLQPRLQRRFALVGRGAPGTGCAAIARVLGRGHQRSY
gi|348021583|gb|AGHY01002586.1|	fig|487527.6.peg.219	peg	gi|348021583|gb|AGHY01002586.1|_269_739	269	739	+	Glutathione S-transferase (EC 2.5.1.18)		FIG00004065	idu(3);At3g50560 idu(3);Glutathione:_Non-redox_reactions	atgcatctctatgccgctcctggcgcttgttccctggcgccgcacatcgtgctgcgcgaactgcagttgccgttccggctggtgcacgtggacaaccgcagcaagcgcaccgccgagggcgaggacttccgcgcgatcaatcccaagggctatgtcgccgcgctgcaactggacgatggccaggtgctgaccgaggggccggcgatcctgctgtatctggccgaccgctgtccgcaggcggcgctggcgccgcccgcaaccgcagacgccttgccgcgctatcgcctgtacgagtggctggccttcatcaacagcgaactgcacgccggcagcgtgccgctgttcgatgcgggactggcgccggacgcggcgcgccgcggtcgccgcccgcctgctgca…	MHLYAAPGACSLAPHIVLRELQLPFRLVHVDNRSKRTAEGEDFRAINPKGYVAALQLDDGQVLTEGPAILLYLADRCPQAALAPPATADALPRYRLYEWLAFINSELHAGSVPLFDAGLAPDAARRGRRPPAAALCPCRERAACAAISARRPLQRG
gi|348021589|gb|AGHY01002583.1|	fig|487527.6.peg.220	peg	gi|348021589|gb|AGHY01002583.1|_326_1084	326	1084	+	NAD(P)H oxidoreductase YRKL (EC 1.6.99.-) @ Putative NADPH-quinone reductase (modulator of drug activity B) @ Flavodoxin 2		FIG00024510	isu;Flavodoxin isu;Flavodoxin	gtgcagcgcctgcaggacgccggccaccatgtccaggtctcggatctgtacgccatggactggaagaccacggtcgacgcgcaggacggcctggacggcgccgcggacgcgcgcttcgatccctcgcgcgactcgcagcgcgccttcgccagcggccgccagcgcgcggacatcgccgctgagcaggacaagctgcgctgggccgatgcgctgctgctgcagttcccgctgtggtggttctcgatgccagccatcctcaagggctgggtggatcgcgtgtatgcctgcggcttcgcctacggggtcggcgaacattccgacacgcactggggcgatcgctatggcgaaggcgcgctggccggcaagcgcgcgatgctgatcgtcaccgccggcggctgg…	MQRLQDAGHHVQVSDLYAMDWKTTVDAQDGLDGAADARFDPSRDSQRAFASGRQRADIAAEQDKLRWADALLLQFPLWWFSMPAILKGWVDRVYACGFAYGVGEHSDTHWGDRYGEGALAGKRAMLIVTAGGWESHYAPRGINGPIDDLLFPIQHGILHYPGFDVLPPFVVYRSGRMEAARFAQTSAALGERLDTLFSAAPIAFRKQNGGDYTIPALTLRDDLAPGRSGVGIHVADAHAAATSERTAATPAP
gi|348021597|gb|AGHY01002579.1|	fig|487527.6.peg.221	peg	gi|348021597|gb|AGHY01002579.1|_88_336	88	336	+	IS1595 transposase				atgctgacgcccgaacaggtcgccgccgccaacgccgccgatcttgcccgcgcctcgcgcccgccccgccgcccacgcccgccacagcagtgcaccgtcggctgcggccactccgccaacggtaagcgcacgcccgcactacgcttgggcggccgctggatggaagaactgggcttcaccatcggcagtacgctgcgcgtgcaggtacgcgacggcgaactggtggtaagcatggccagcaaaagctga	MLTPEQVAAANAADLARASRPPRRPRPPQQCTVGCGHSANGKRTPALRLGGRWMEELGFTIGSTLRVQVRDGELVVSMASKS
gi|348021599|gb|AGHY01002578.1|	fig|487527.6.peg.222	peg	gi|348021599|gb|AGHY01002578.1|_54_206	54	206	+	hypothetical protein				atgtccaactccctttcgctgtcctccaagctgtggaccggttcggccatcgccgtcgcgctgccattggccgccgccgcatgcgggttcgccctcggcctgcccgccggggcagaccctggcgctgagcatcggcgccacggtgatcgctag	MSNSLSLSSKLWTGSAIAVALPLAAAACGFALGLPAGADPGAEHRRHGDR
gi|348021605|gb|AGHY01002575.1|	fig|487527.6.peg.223	peg	gi|348021605|gb|AGHY01002575.1|_92_313	92	313	+	cytochrome B561				ttgctgctcggcgtggtcggcctgaccatgggcgagttgccgaagacacccaagtacttctgggtctacaccgggcacaagtcgctgggcctgaccgtgctggcgctggtgatcgtgcgggctgggctggcgcctgtacgccggcgcgccgaagccggttgccgggcacgcccggctggcaggagcgcatcgccggcgccacccacgtgctgctgtacgtga	MLLGVVGLTMGELPKTPKYFWVYTGHKSLGLTVLALVIVRAGLAPVRRRAEAGCRARPAGRSASPAPPTCCCT
gi|348021607|gb|AGHY01002574.1|	fig|487527.6.peg.224	peg	gi|348021607|gb|AGHY01002574.1|_613_119	613	119	-	Ribosome-associated heat shock protein implicated in the recycling of the 50S subunit (S4 paralog)		FIG00001497	isu;Heat_shock_dnaK_gene_cluster_extended isu;Cell_division-ribosomal_stress_proteins_cluster	atgcctttggtcggcgcgatggcttccgagccgcatctgccctctggctgcctgcaaccccaacgcaagtggatgtcgagcaacgcaatgaacgaatctgtcgtgcaagccgccgcggtgcgcctggatgtctggctgtgggccgcgcgcttcttcaagacccgcagcctgtccaagcaggcggtggaaaccggcaaggtggacgtggccgggcagcggcccaagtcctcgcgcgcggtgcgcgtgggcgaacagttgcgcgtgcagcgcggcgacgaggtgttcgagatccaggtgttgggcctgagcgacacccgcggcccggccagcgtggcgcaggcgctgtaccaggagagcgaggcctcgcgcgaacgccgcgcgcaactgcgcgcgcagcgc…	MPLVGAMASEPHLPSGCLQPQRKWMSSNAMNESVVQAAAVRLDVWLWAARFFKTRSLSKQAVETGKVDVAGQRPKSSRAVRVGEQLRVQRGDEVFEIQVLGLSDTRGPASVAQALYQESEASRERRAQLRAQRSAERNGYQAPDGKPDKRARRLIRALGDLDAL
gi|348021613|gb|AGHY01002571.1|	fig|487527.6.peg.225	peg	gi|348021613|gb|AGHY01002571.1|_83_916	83	916	+	5-Enolpyruvylshikimate-3-phosphate synthase (EC 2.5.1.19)		FIG00075970	idu(1);Common_Pathway_For_Synthesis_of_Aromatic_Compounds_(DAHP_synthase_to_chorismate)	atgccgagggcgtcacttcggtgcaggaaccgcatcccacccgcgactataccgagcgcatgctgtccgcgttcggcgtggatatcacgttcgcgcccggccaggcgcggctgcgcggcggccagcgcctgcgacgctaccgatatcgcggtgccggcggacttctcctcggcggcgttcttcatcgtcgccgccagcatcattcccggctccgccatcaccctcaaggcggtcgggctcaatccacgccgcaccggcctgctcgccgcgttgcggctgatgggcgcagacatcgtcgagcacaaccacagcgagcacggcggcgagccggtggcgcgatctgcgggtgcgctacgcgccgctgcgcggtgcgcggattccggaggacgtggtgccgga…	MPRASLRCRNRIPPATIPSACCPRSAWISRSRPARRGCAAASACDATDIAVPADFSSAAFFIVAASIIPGSAITLKAVGLNPRRTGLLAALRLMGADIVEHNHSEHGGEPVARSAGALRAAARCADSGGRGAGHDRRVPGVVRGRGRGRRPDRGQRRGGTAGQGIGPPGGDGHRAAKPGHRRRRTPDGATHSRRHAGRRDHREPRRPSHRHGLRHRRATGAGRGADRGRGERGHLVPGVWTHWRVVLDSGCAQRKRVHYTGRVWTRPVQASRPDVRA
gi|348021613|gb|AGHY01002571.1|	fig|487527.6.peg.226	peg	gi|348021613|gb|AGHY01002571.1|_1057_893	1057	893	-	hypothetical protein				atgatcgtgatcgccctcgccctggcgatcgccggctggtggctgggccatggaccgcgccgacgacaccagcagctacagctatcgcgccgacgcgccctcgacgccgacgaacgatccgccgcgtccgcagccgtcgcactaagcgcgcacatccgggcgtga	MIVIALALAIAGWWLGHGPRRRHQQLQLSRRRALDADERSAASAAVALSAHIRA
gi|348021615|gb|AGHY01002570.1|	fig|487527.6.peg.227	peg	gi|348021615|gb|AGHY01002570.1|_454_326	454	326	-	hypothetical protein				atgacccgcaaggacgagtacccgtccgacaccctggtgtgggacgccaagggcacgccgctgaagcagcgcacggtgccggcgttcgaacccaagcccggtgccaccgtgctgtaccaggtgcgctga	MTRKDEYPSDTLVWDAKGTPLKQRTVPAFEPKPGATVLYQVR
gi|348021621|gb|AGHY01002567.1|	fig|487527.6.peg.228	peg	gi|348021621|gb|AGHY01002567.1|_1106_513	1106	513	-	Lipopolysaccharide ABC transporter, ATP-binding protein LptB		FIG00002720	ff	gtgttctacatgatcggtggcctggtcgacgccgatgccgggcgcatcgtgctcgacggcaacgacatcaccgcgctgccgatgtacaagcgcgccaagctcggcgtcggctacctgccgcaggaaccatcggtgttccgcaagctcagcgtcgccgacaacatccgcctggtgctggaactgcgcgaggatctggacaacgccggacaggaacgcgaactggtggcgctgctggacgaactgcagatcagccacgtcgccgaccagctcggcgccagcctctccggcggcgagcgccgccgctgcgaaatcgcccgcgcgctggcggccaagccgcggctgatgctgctcgacgaacctttcgccggcgtcgacccgatctcggtcggcgaaatccag…	MFYMIGGLVDADAGRIVLDGNDITALPMYKRAKLGVGYLPQEPSVFRKLSVADNIRLVLELREDLDNAGQERELVALLDELQISHVADQLGASLSGGERRRCEIARALAAKPRLMLLDEPFAGVDPISVGEIQRIVTHLKQRGIGVLITDHNVRETLGICDRAYILNEGSVLAQGAPEALLANSDVRRVYLGETFRL
gi|348021625|gb|AGHY01002565.1|	fig|487527.6.peg.229	peg	gi|348021625|gb|AGHY01002565.1|_303_115	303	115	-	TonB-dependent receptor		FIG00004179	idu(60);Ton_and_Tol_transport_systems	gtggtcgatgccagcgtgcgctaccagctcacctcgcgcagcagcctcggcctgcaggtcaagaacctcaccgacgcccgctatgcctacgtgtggtacgacaactttttctggggcggcaacgaccagccgatgttctcgccggcgcccggacgctcggcctacctgagcgtcgaagtgcggctgtag	MVDASVRYQLTSRSSLGLQVKNLTDARYAYVWYDNFFWGGNDQPMFSPAPGRSAYLSVEVRL
gi|348021631|gb|AGHY01002562.1|	fig|487527.6.rna.1	rna	gi|348021631|gb|AGHY01002562.1|_359_278	359	278	-	tRNA-Leu-TAG				gcgaaagtggcggaattggtagacgccctggttttaggtaccagtgccgcaaggcgtaggggttcgagtcccctctttcgca
gi|348021635|gb|AGHY01002560.1|	fig|487527.6.peg.230	peg	gi|348021635|gb|AGHY01002560.1|_408_31	408	31	-	Membrane-bound lytic murein transglycosylase B precursor (EC 3.2.1.-)			isu;Murein_Hydrolases	gtgcagggcctggacggcctggactacctcgacaagttcgagaactacgccacgccgcatcgccagcacggcgactggagcctgcaggacccacgcgatcccggccgcagcgaccgcaatctacaccggcgccggcggccgctacaccctgctgggatccgggcctgcagcgccgcatcgagatcgccaccaccggcagccgcaccctggtggcctggaacccgggcgaggccggcgcgcagaagatggccgacgtcggcccgcactggcgccaggttcgtgtgcctggaagcggccaacgccgggcccgaggtgatcgacctggcgccgggcgcccagcacgtgctgcagcagacgatttccgtcatggcgttgtga	MQGLDGLDYLDKFENYATPHRQHGDWSLQDPRDPGRSDRNLHRRRRPLHPAGIRACSAASRSPPPAAAPWWPGTRARPARRRWPTSARTGARFVCLEAANAGPEVIDLAPGAQHVLQQTISVMAL
gi|348021645|gb|AGHY01002555.1|	fig|487527.6.peg.231	peg	gi|348021645|gb|AGHY01002555.1|_43_486	43	486	+	Histone acetyltransferase HPA2 and related acetyltransferases		FIG00001650	ff	atgcacgcactgcgcatcagcaccgacaagcaggaactggatctgccgttgatccatcgctttctcagcgagcaggcctattggtgcctgggcatcccgctggacacggtgcagcgggcgatcgccgggtccctgtgcttcggcggctatctcgatggcgtggggcaggtggcgttcgcccgggcgatcaccgacggcgcgacgttcggctatctcgccgacgtgttcgtgctcgacgcctaccgcggccgcggctacggcaagcagttggtggcggcggtgatggcccccccgcagctgcaaggcctgcgccgcttcatgctggccacctccgatgcgcatgcgctgtatgcccagcacggcttcgccgcgccggcacgcccgcagtcgctgatggaa…	MHALRISTDKQELDLPLIHRFLSEQAYWCLGIPLDTVQRAIAGSLCFGGYLDGVGQVAFARAITDGATFGYLADVFVLDAYRGRGYGKQLVAAVMAPPQLQGLRRFMLATSDAHALYAQHGFAAPARPQSLMEIAYPDLYRTSTTAA
gi|348021659|gb|AGHY01002548.1|	fig|487527.6.peg.232	peg	gi|348021659|gb|AGHY01002548.1|_303_40	303	40	-	Peptidyl-prolyl cis-trans isomerase (EC 5.2.1.8)			isu;Queuosine-Archaeosine_Biosynthesis	gtgcgccacgaccgcggcgtgctgtccatggccaatgccggccccagcaccaacggcagccagttcttcatcacccacgtcgccaccccgtggctggacggcaagcacaccgtgttcggcaaggtgctcgagggcctggacgtggtcgacagcgtcgcccagggcgacgtgatcaacaagatcaccatcgaaggcgacgccgaggcggtgctggcggccaaggccgaccgcgtcgccgagtggaaccgcacgctcgacgcctga	MRHDRGVLSMANAGPSTNGSQFFITHVATPWLDGKHTVFGKVLEGLDVVDSVAQGDVINKITIEGDAEAVLAAKADRVAEWNRTLDA
gi|348021661|gb|AGHY01002547.1|	fig|487527.6.rna.2	rna	gi|348021661|gb|AGHY01002547.1|_178_251	178	251	+	tRNA-Arg-CCG			isu;tRNAs	gcgcccgtagctcagccggatagagtagtggcttccgaagccattggtcgggggttcgaatccctccgggcgcg
gi|348021665|gb|AGHY01002545.1|	fig|487527.6.peg.233	peg	gi|348021665|gb|AGHY01002545.1|_115_294	115	294	+	Lipoprotein releasing system ATP-binding protein LolD		FIG00000771	idu(1);Lipoprotein_sorting_system	gtgatggaactgctggaggagatcaacgcgcagggctcgaccatcgtcatggtcacccacgatccggaactggccgcgcgcgcccagcgcaacgtgcacatcgtcgacggccaggccaccgacctgcagcgcgaaccggtgctggcgcacggcggcagcgacgccgcggccgtgcgctga	MMELLEEINAQGSTIVMVTHDPELAARAQRNVHIVDGQATDLQREPVLAHGGSDAAAVR
gi|348021667|gb|AGHY01002544.1|	fig|487527.6.peg.234	peg	gi|348021667|gb|AGHY01002544.1|_84_248	84	248	+	Arabinose 5-phosphate isomerase (EC 5.3.1.13)		FIG00000743	ff	gtgatgacccggcagccgcgcaccatcggcgccgaccagctcgccgccgaggccgcacggctgatggagacccatcagatcaacggcctgatcgtggtcgacgcggccgaccgcgcggtcggcgcgctcaacattcacgacctgttgcgcgccagagtggtttaa	MMTRQPRTIGADQLAAEAARLMETHQINGLIVVDAADRAVGALNIHDLLRARVV
gi|348021672|gb|AGHY01002541.1|	fig|487527.6.peg.235	peg	gi|348021672|gb|AGHY01002541.1|_514_47	514	47	-	Coproporphyrinogen III oxidase, oxygen-independent (EC 1.3.99.22)		FIG00007556	isu;Heme_and_Siroheme_Biosynthesis	gtgccgttctgccgcagtccctgcttctactgcggctgccaccgggtgatcacccgcgacccggagcgcggccgcgcctacgtgcagcggctgctgcgcgaggcggcgatgatggcggcctgtttcgagggcgagcgcgaggtggtgcaactgcacctgggcggcggcacccccaacttcctcgccccagcgttgctcggcgagctggtgcagggcctgcgcggcctggttccgcttcagccaggcgccggaccgcgagatgtccatcgaactggacccgcgcacggtgacgccgcaggacatcgccgcgctggccgaactgggcttcaaccgcgccagccctcggcatccaggatttcgacccgctggtgcagcaggcgatcaaccgccgccagggcg…	MPFCRSPCFYCGCHRVITRDPERGRAYVQRLLREAAMMAACFEGEREVVQLHLGGGTPNFLAPALLGELVQGLRGLVPLQPGAGPRDVHRTGPAHGDAAGHRRAGRTGLQPRQPSASRISTRWCSRRSTAARACTRPWTSCVPAACTACARSTST
gi|348021696|gb|AGHY01002529.1|	fig|487527.6.peg.236	peg	gi|348021696|gb|AGHY01002529.1|_20_493	20	493	+	Putative deoxyribonuclease YjjV		FIG00038461	isu;YcfH isu;Deoxyribose_and_Deoxynucleoside_Catabolism	gtgcatgcgcggcgtgcggtggacgcggtgatcctggcgatccgcaaggtcggcggcgtgcgtggcgtggtgcacagtttcgccggcagcgccgaacaggccgcgcagttgcgttcgctggatttcctgatcggcctcggcgggccggtcacctacgaacgggcgcagcgcctgcgccgggctcgccgccacggcgcccctggagcaactgctgctggagaccgatgcgccggaccagcccgatgcggcgatccgcgggcagcgcaacgaaccggcgcggctgcgcacggtgctggacaccatcgccgcgctgcgcgacgcacctgccgcggccattgccgcgcagaccacggccaacgcacgacgcctgttcggcctgcccgatacgcgcgccgcgac…	MHARRAVDAVILAIRKVGGVRGVVHSFAGSAEQAAQLRSLDFLIGLGGPVTYERAQRLRRARRHGAPGATAAGDRCAGPARCGDPRAAQRTGAAAHGAGHHRRAARRTCRGHCRADHGQRTTPVRPARYARRDACHHLTRRVPAHRNSDTARRLLTH
gi|348021710|gb|AGHY01002522.1|	fig|487527.6.peg.237	peg	gi|348021710|gb|AGHY01002522.1|_208_963	208	963	+	Cysteinyl-tRNA synthetase (EC 6.1.1.16)		FIG00000086	idu(1);tRNA_aminoacylation,_Cys idu(1);Conserved_gene_cluster_possibly_involved_in_RNA_metabolism idu(1);At2g23840	gtggacgacaagatcaacgccgccgcgcaggcgcagggcgtgccgatctcggccatcaccgaccgcttcgccgccatctaccgccaggacatggccgcgctgggcgtgaccccgccggacatcgagccggcggccaccgcgcacatcccgcacatcgtggcgatgatcgagcggctgatcgccagcggccacgcctacgccgccgaggggccacgtgctgttcgcggtggccagcttcgccgactacggcaagctgttcgcggcgctacccggaggagatgctggccggcgcccgcgtcgaggttggccccgtacaagcgcgacccgggcgacttcgtgttgtggaagccctccagcgacgatctccccggctgggattcgccgtggggccgcggccgc…	MDDKINAAAQAQGVPISAITDRFAAIYRQDMAALGVTPPDIEPAATAHIPHIVAMIERLIASGHAYAAEGPRAVRGGQLRRLRQAVRGATRRRCWPAPASRLAPYKRDPGDFVLWKPSSDDLPGWDSPWGRGRPGWHIECSAMAAAHLGETIDIHAGGVDLQFPHHENEIAQSECAHGGAPFARVWLHNGMLTFSGAKMSKSLGNIETVHDLIERHRPEALRCALLSAHYRQPLDWSDALIQAQVARLDGL
gi|348021714|gb|AGHY01002520.1|	fig|487527.6.peg.238	peg	gi|348021714|gb|AGHY01002520.1|_2329_149	2329	149	-	Large exoproteins involved in heme utilization or adhesion		FIG01304224	icw(1);CBSS-316057.3.peg.3521 icw(1);At5g04520_AT1G06240	gtgaccaacctgaccagcttcggcagcggcaaccgctacagccacaccagctacggcaatctcggcaactgggcgctgctcgccggcagcagcaatgtctatgtcgccagcgacggcaacggcaacccgacctggatcatgatcgaggggcagacgcgcccgttcctggccagcgagtacagcaccaccatcggcaacgcgcaccagttgcagttgatggcgtacaacctggcggccagctacagcctgtccgccgacatcgacgccagccagaccgccggcagcaatgccagcggcatgtggagcagcgccggcttcagcccggtcggcgacagcaccggcgccttcacgggcagcctcaacggcgcaaaccacacgatcgccgggctgaccatcgca…	MTNLTSFGSGNRYSHTSYGNLGNWALLAGSSNVYVASDGNGNPTWIMIEGQTRPFLASEYSTTIGNAHQLQLMAYNLAASYSLSADIDASQTAGSNASGMWSSAGFSPVGDSTGAFTGSLNGANHTIAGLTIARGGASYVGLFGNTGLASQIGNLALTGATVVGTAYVGGVAGFNAGTLSGISVNGTMSGTGNFVGGLTGYNNAGTIAGVQTSGTVVGSGGPYSGNYVGGLIGSNANGTISASSSSSTVSGGSSVGGLVGNDYQGSYTNAFATGNVSSTSTTTGNNVGGLIGNAIQSTLQNVHATGNVTATTSSAGGLVGMAGAGSIQNAYASGNVSGTRSVGGLVGRSSATIDTAYATGAVNGAANGTSSELGGLVGTLDHGSLASTHATGNVSGGSF…
gi|348021714|gb|AGHY01002520.1|	fig|487527.6.peg.239	peg	gi|348021714|gb|AGHY01002520.1|_2916_2326	2916	2326	-	Large exoproteins involved in heme utilization or adhesion		FIG01304224	icw(1);CBSS-316057.3.peg.3521 icw(1);At5g04520_AT1G06240	ttgatcgacaacggcgcgttcaccggcaacgtcaacgggcaaagcgcggtcggcggcctggcgggcaacaacgtcagcggcacgatccgcaattcccacagcaccggcagcgtgaccggcagctccagcaacacgggcggcctggtcggctacaacgacggcggcagcctcaccaatacgtattccaccagcaccgtgagcggcaccaactctgtcggcggcctggtcggaacgaaccagaatgccggcacgatccagaacagctatgccagcggcagcgtgatcggcaccagctacggcgtcggcgggctggtcggcatgaactaccagagcgccatcgccaacacctacgccaccggcagcgtcactgcgccgacctcggtgggcgggctggtgggc…	MIDNGAFTGNVNGQSAVGGLAGNNVSGTIRNSHSTGSVTGSSSNTGGLVGYNDGGSLTNTYSTSTVSGTNSVGGLVGTNQNAGTIQNSYASGSVIGTSYGVGGLVGMNYQSAIANTYATGSVTAPTSVGGLVGINNPGSAAVTSSSVSNSYATVRSTAPTTSAGWSAPIRAASATRPGTSAAPARPMPSATAAAAA
gi|348021714|gb|AGHY01002520.1|	fig|487527.6.peg.240	peg	gi|348021714|gb|AGHY01002520.1|_3653_2913	3653	2913	-	filamentous haemagglutinin family outer membrane protein				gtggacagcgcggcggccagcaccatcagcggcgcgttgaatggcggcaccaacgtcaccctgctcgccaccctcaccaacgccagcggtccgggcaacgtgagcagcggcgccggcgacatcaacgtcaatgcggcgatcggctggagcggcaactccacgctgaccctggacgcgtaccacagcatccacctcaatgccgccgtcaccgcgaccggcgacacggccggcctggtgctgaattacgccggctataccgaaaacggcagcgtcggcggcacgggcgactactacgtcaacgcgccggtctcgctcggcggcgcgcatgccagcctgagcatcaacggacaggcgtaccggctgatccactcgctggccgacgcggccacctatttcaac…	MDSAAASTISGALNGGTNVTLLATLTNASGPGNVSSGAGDINVNAAIGWSGNSTLTLDAYHSIHLNAAVTATGDTAGLVLNYAGYTENGSVGGTGDYYVNAPVSLGGAHASLSINGQAYRLIHSLADAATYFNTPGSYALAQDIDLSGVTRSSALVSSFQSKLAGLGHSINNLTISGASGYVGLFGTTSSNSVIRDLHLGNVSVSGGYYVGGLVGYGQGAIKNVTVDGSVTGTSGGVGGLTATTWA
gi|348021716|gb|AGHY01002519.1|	fig|487527.6.peg.241	peg	gi|348021716|gb|AGHY01002519.1|_546_67	546	67	-	TRAP-type C4-dicarboxylate transport system, large permease component		FIG00006463	isu;TRAP_Transporter_collection	gtgacgcatgccgcacgcaccaccggggtgatcctgttcgtgatcgccaccgcggcggtgttcggctggctgctggcctacctgcaggtgccggcggcagcggtgcacttcctgcagtccatcgcccacagccagcacaccgtgctgctgatgatcgtggtgatgctgctgttgctgggcatgttcatggacctggcgccgaagatcctgatctgcacgccgatcttcctgccggtggccaaggcctacggcatcgacccgatccatttcggcctggtgatggtgctggccggcggtatcggcctgatcaccccgccggtgggctcggtgctgttcatcggcacctcgatcgggcagatcaccgtggcccagagcatgcgcaccatctggccgttctgg…	MTHAARTTGVILFVIATAAVFGWLLAYLQVPAAAVHFLQSIAHSQHTVLLMIVVMLLLLGMFMDLAPKILICTPIFLPVAKAYGIDPIHFGLVMVLAGGIGLITPPVGSVLFIGTSIGQITVAQSMRTIWPFWLAALCVLLIVAFFPELSLWLPRALRA
gi|348021716|gb|AGHY01002519.1|	fig|487527.6.peg.242	peg	gi|348021716|gb|AGHY01002519.1|_941_543	941	543	-	hypothetical protein				gtgagcatgaccgcggcgctggtggcgcctgctggtgccgccctcgcacaacctgatcctgttctcggccgcggccggcggcgggctgtcgatcgccgacctgttcgcggccggcatcgtcccggcgctgctgatgaccgcggcgatgatgctcaccggctatgcggtggcgcgcgcgcgcggctacggcaccgaagcgttcccgggctggcgcgcggtggcgctgcgcctggtcggcgcgctgccgggcctgggcctggtcgcgctgatcttcgtcggcatccgcgccggcatcttcaccgcggtggagagtgcggcgatcgcggtggtgtacgcgctgctggtcaccgcgctgctgtaccggcagctgcgctggggccgagttcttcgccgcggtga	MSMTAALVAPAGAALAQPDPVLGRGRRRAVDRRPVRGRHRPGAADDRGDDAHRLCGGARARLRHRSVPGLARGGAAPGRRAAGPGPGRADLRRHPRRHLHRGGECGDRGGVRAAGHRAAVPAAALGPSSSPR
gi|348021718|gb|AGHY01002518.1|	fig|487527.6.peg.243	peg	gi|348021718|gb|AGHY01002518.1|_89_454	89	454	+	Transport ATP-binding protein CydC			isu;Terminal_cytochrome_d_ubiquinol_oxidases isu;Cytochrome_c_oxidases_d@O_copy isu;Terminal_cytochrome_oxidases	atgcgcgtctgcagcgggtgctggccgacgtgcgcctggacgcctggctgcacgaagtcggtggcctcgacgcctggctcggcgaaaacggcgccaccatgtccgccggccaggcccggcgcctggccctgggcccgtgcactgctgcgcgaagcaccgctgctggtgctggacgaacccaccgaaggcctggacgtggacacggcgcaggcgctgctgcgcgacctggcgcaggcgctgggccagcgcagcctgctgctgatcagccacgacgtgctgcccgagggcgtggtgcatgtgcgctatcgcttgcaggagggccggctcgtgcgcaacaccgaggcgtcaagcgccgacatcgtgtga	MRVCSGCWPTCAWTPGCTKSVASTPGSAKTAPPCPPARPGAWPWARALLREAPLLVLDEPTEGLDVDTAQALLRDLAQALGQRSLLLISHDVLPEGVVHVRYRLQEGRLVRNTEASSADIV
gi|348021722|gb|AGHY01002516.1|	fig|487527.6.peg.244	peg	gi|348021722|gb|AGHY01002516.1|_329_192	329	192	-	hypothetical protein				gtggtggtgttggcgtcctgcaagaaacaggatcagcagcaggccatgcccgccgccggaggtgggcgtgctgcaggcgcagccgcagaccgtgccgctgcagcgcgaactggtcggccgcctgtccgcgttccgtag	MVVLASCKKQDQQQAMPAAGGGRAAGAAADRAAAARTGRPPVRVP
gi|348021722|gb|AGHY01002516.1|	fig|487527.6.peg.245	peg	gi|348021722|gb|AGHY01002516.1|_931_368	931	368	-	Transcriptional regulator, TetR (AcrR) family [USSDB4A]		FIG01112288	ff	atgggcctgagcatggacacggtggcggcacgcgccggctgctccaagcagaccctgtacagccgctaccgcagcaagcaagccttgctgcggcgggcgctgcaggaccacctggacctggccaccgcgcacctggagccggcgcaggacgacctgcgcggcagcctgctgcgcttcgcctgcgaatacctggaacagttgttcgagccgagcgttctgcagagttcccagctgatcgccgccgaatctcggcacttccccgaagaagcccgctccttgttccgcgacagcgccggagcgctgatgcagcgcctgagcgagcacctgcgcgatgccatggcccggggccagctccggcatgacgatccgcacttcatggccgaactgctgttgagcatg…	MGLSMDTVAARAGCSKQTLYSRYRSKQALLRRALQDHLDLATAHLEPAQDDLRGSLLRFACEYLEQLFEPSVLQSSQLIAAESRHFPEEARSLFRDSAGALMQRLSEHLRDAMARGQLRHDDPHFMAELLLSMIVGMDFERRRFHSAHRDAPAAQRAWAEFAVDGFLRAFTPAPSLPSTKPDRSTTR
gi|348021726|gb|AGHY01002514.1|	fig|487527.6.peg.246	peg	gi|348021726|gb|AGHY01002514.1|_52_783	52	783	+	O-acetylhomoserine sulfhydrylase (EC 2.5.1.49) / O-succinylhomoserine sulfhydrylase (EC 2.5.1.48)		FIG00000417	icw(1);Methionine_Biosynthesis icw(1);Methionine_Biosynthesis	atgtcgacgccgcggcattgcgcacctggctgttcgccgagggcgcgctcggcgacgcctgaggccggcatgcggccgcggcgccgccgaagcgctgacaaccccgcggcatggcttcataaccgcaggtttgcattcgccgccgcgcgcggcgctatcgtctgcgctccccgttgccgagagccgcccatgtccgacccgaactggaagctggaaaccatcgccgtgcacggcggctaccgtcccgatccgaccacccgcgcggtggcggtgccgatctaccagaccgtggcctacgccttcgacgacacccagcacggcgccgacctgttcgacctgaaggtgcagggcaacatctacagccgcatcatgaaccccaccaccgatgtgctggagcag…	MSTPRHCAPGCSPRARSATPEAGMRPRRRRSADNPAAWLHNRRFAFAAARGAIVCAPRCREPPMSDPNWKLETIAVHGGYRPDPTTRAVAVPIYQTVAYAFDDTQHGADLFDLKVQGNIYSRIMNPTTDVLEQRIAALEGGIGALAVASGQAAVTYAIQTIAEAGDNIVSSSALYGGTYNLFAHTLPLSGIQTRFADYRDPGAFAGLIDARTKAIFVESIGNPRGNVTDLEAVAAIPTPTACR
gi|348021726|gb|AGHY01002514.1|	fig|487527.6.peg.247	peg	gi|348021726|gb|AGHY01002514.1|_774_1526	774	1526	+	O-acetylhomoserine sulfhydrylase (EC 2.5.1.49) / O-succinylhomoserine sulfhydrylase (EC 2.5.1.48)		FIG00000417	icw(1);Methionine_Biosynthesis icw(1);Methionine_Biosynthesis	gtgccgctgatcgtcgacaacaccgtgcccacaccgtacctgctgcggccattcgacttcggcgccgacatcgtggtgcattcgctgaccaagtacctgggcggccacggcaccagcctgggcggggcgatcgtcgattccgggcgctttccgtgggcggcgcacgcgcagcgcttccgccgcctcaacgagccggacgtgagctaccacggcgtggtctacaccgaggcgctgggcgaggccgcctacatcggccgtgcgcgggtggtgccgctgcgcaacacgggtgcggcactgtcgccgttcaacgcgttccagatcctgcagggcatcgagacgctgccgctgcgcatggaccggatcaaccagaacaccctggcgctggcgcggcacctgcag…	MPLIVDNTVPTPYLLRPFDFGADIVVHSLTKYLGGHGTSLGGAIVDSGRFPWAAHAQRFRRLNEPDVSYHGVVYTEALGEAAYIGRARVVPLRNTGAALSPFNAFQILQGIETLPLRMDRINQNTLALARHLQGEAKVEWVNYAGLPDHPEHALAQKYLRGHGSGVLTFGLRGGRAAGARFLDALQLFTRLVNIGDAKSLATHPASTTHRQLSPEELQRSGVSEDTVRLSVGIEHIDDLLADLRQALAQA
gi|348021732|gb|AGHY01002511.1|	fig|487527.6.peg.248	peg	gi|348021732|gb|AGHY01002511.1|_31_402	31	402	+	hypothetical protein				atgagcaccgacgcccgccgctcgccgcgccgccaggtcccggagatggtgccggtcctggacctgatggaagacgccgtggtcggccgcctcggcaacgtgtccgaacacggcatgctgctgctggctttcggcgccgctgcacgaggacgccctgtaccagttgcgcttcgcgatgccgcacgccgaccgcgaggtgcagatcgacgtcggcgcgcacctgctgtggagcgaaccttctcacgcaccgggccaggcctgggccggcttccgcttcctgaccatttctcccgcgcaccgcgacctgttgcggcagtggatcaacgccgcatccggcggctaacgccgccgatctcgcaggagcggctttag	MSTDARRSPRRQVPEMVPVLDLMEDAVVGRLGNVSEHGMLLLAFGAAARGRPVPVALRDAARRPRGADRRRRAPAVERTFSRTGPGLGRLPLPDHFSRAPRPVAAVDQRRIRRLTPPISQERL
gi|348021734|gb|AGHY01002510.1|	fig|487527.6.peg.249	peg	gi|348021734|gb|AGHY01002510.1|_67_207	67	207	+	hypothetical protein				atgaagccctgcgcaacgcgctgccgctgggatgcggccgggcagtcgctcgggcaggcgttcggtacgccgggccggcgcgcgcacctgcagctgtcccagtcgcccggggcagggcgccgacctgcagttgggcgatga	MKPCATRCRWDAAGQSLGQAFGTPGRRAHLQLSQSPGAGRRPAVGR
gi|348021738|gb|AGHY01002508.1|	fig|487527.6.peg.250	peg	gi|348021738|gb|AGHY01002508.1|_497_760	497	760	+	P-hydroxybenzoate hydroxylase (EC 1.14.13.2)		FIG00139160	idu(1);p-Hydroxybenzoate_degradation	atgcgtacccaggtcgccatcgtcggcgccggcccggccgggctgctgctcggacagttgctgcacggccacggcatcgacaccgtcatcgtcgagcggcagacgcccgagcacgtgctgtcgcggatccgcgccggcgtgctggaacagggcaccgccgacctgctgtgcgccgccggtgccggcgcgcgcatgcagcgcgaaggcatcgtccaccatggcttcgagctggcgctggagcagcgccgcgaacgatcgaactga	MRTQVAIVGAGPAGLLLGQLLHGHGIDTVIVERQTPEHVLSRIRAGVLEQGTADLLCAAGAGARMQREGIVHHGFELALEQRRERSN
gi|348021740|gb|AGHY01002507.1|	fig|487527.6.peg.251	peg	gi|348021740|gb|AGHY01002507.1|_512_15	512	15	-	FIG01210281: hypothetical protein		FIG01210279	ff	gtggccgatccgaaccagccggtggcctcgggcaataccccggcggccgccgacatcgccgcggccaaggcgctgggcgcgcagttcgacccgcagcgcaacccggccgacgacctggagaccgccatggtcgaggccaagcgcggcggcaagcgcatcctgctcgacgtgggcaacgaggcgtgcgactggtgccacaccctggacaccttcatcgagggcgatgcggaactgcgcagccttccgcgatgggaacttcgtctgggtcaaggtcaacgtcagcgacgccaacaagaacgaggcgttcatggcgcagtacccgaagatcgtcgacttcccgcacctgctggtgctcgacgccgacggcaagctgctgcattcgcaggtggtcggcgacct…	MADPNQPVASGNTPAAADIAAAKALGAQFDPQRNPADDLETAMVEAKRGGKRILLDVGNEACDWCHTLDTFIEGDAELRSLPRWELRLGQGQRQRRQQERGVHGAVPEDRRLPAPAGARRRRQAAAFAGGRRPAEGQGLRSQEVLGLPQAVGAAQALSRGAWFFS
gi|348021746|gb|AGHY01002504.1|	fig|487527.6.peg.252	peg	gi|348021746|gb|AGHY01002504.1|_73_507	73	507	+	hypothetical protein				gtgccggcgccaacgccgcggtcggcaacttacgccatcaccgcgtccggtgccaccggcgcggggctgtccaactacgccatcacctacgtcgacggcctgttgaacgtggtccccggcagtggcgatggcggtggtgccggtacccagctgaccaccacggccgtgcaggcgatcaacacctcggtcgccgtcgcaacgaccagcgatgccgtcggcgcggcaccgacgcgtcagcaaaaggccgacgaagccgccaaggaactggctgcggcgacacaggccagcggcggtggcaccgtcacggccgccacccgactcgatcctgatcgtcgatggcggcatccgcgccccgagcgtcgcctgcaccccgagcggcacgtccaacgcatccgcgga…	MPAPTPRSATYAITASGATGAGLSNYAITYVDGLLNVVPGSGDGGGAGTQLTTTAVQAINTSVAVATTSDAVGAAPTRQQKADEAAKELAAATQASGGGTVTAATRLDPDRRWRHPRPERRLHPERHVQRIRGQLHHPTVTGMA
gi|348021750|gb|AGHY01002502.1|	fig|487527.6.peg.253	peg	gi|348021750|gb|AGHY01002502.1|_137_289	137	289	+	hypothetical protein				gtggcggcgttgttgctgctggtcgccgccggcgcgcgcctgggtgcgtcgctgatccccactctcgtctgctggagcctgccatgccgtcgtccgatccttccgccacacttcccctcgacaccgtggtgttcgatctcggcggcgtcctga	MAALLLLVAAGARLGASLIPTLVCWSLPCRRPILPPHFPSTPWCSISAAS
gi|348021752|gb|AGHY01002501.1|	fig|487527.6.peg.254	peg	gi|348021752|gb|AGHY01002501.1|_342_145	342	145	-	hypothetical protein				atggcgatcgatggagtaccagcggccaccctgcatcggcgtatgaccgtcggcgtcgggtgtgccggcgctgcagccatcgcagacctcggcgacgccgtgctcgaacggccaggcgaagtcgtggaccggcgcgatgacctcgcgcagttgccggtcgtagaagccgatgcggccgtggacgatgccgccgggtga	MAIDGVPAATLHRRMTVGVGCAGAAAIADLGDAVLERPGEVVDRRDDLAQLPVVEADAAVDDAAG
gi|348021758|gb|AGHY01002498.1|	fig|487527.6.peg.255	peg	gi|348021758|gb|AGHY01002498.1|_181_8	181	8	-	Multimodular transpeptidase-transglycosylase (EC 2.4.1.129) (EC 3.4.-.-)		FIG00000011	ff	gtggcgctgaaggaccagccgatcgcccgcaacgacccgccggccggcatggtccaggtcaccctcaacggcgccaccgaatgggtcaagaccgaggacatggaccgaatccagcagttcgacgaaagcctgcaggaccagaagaccgacgacgcggcattcgacatcttctga	MALKDQPIARNDPPAGMVQVTLNGATEWVKTEDMDRIQQFDESLQDQKTDDAAFDIF
gi|348021758|gb|AGHY01002498.1|	fig|487527.6.peg.256	peg	gi|348021758|gb|AGHY01002498.1|_414_172	414	172	-	Multimodular transpeptidase-transglycosylase (EC 2.4.1.129) (EC 3.4.-.-)		FIG00000011	ff	atgatgcgcgacgtggtccagcgcggcaccggcactcccgccaaggtgctcggccgcgaggacgtcggcggcaagaccggctccaccaacgaccaccgcgacgcctggttctccggcttcggcggcccgtacgtgaccacggtctgggtcggccggcgacgactaccgctcgctcggctaccgcgagtacggcggcaaggcggcgctgccgatctggatcgactacatgccgggtggcgctga	MMRDVVQRGTGTPAKVLGREDVGGKTGSTNDHRDAWFSGFGGPYVTTVWVGRRRLPLARLPRVRRQGGAADLDRLHAGWR
gi|348021758|gb|AGHY01002498.1|	fig|487527.6.peg.257	peg	gi|348021758|gb|AGHY01002498.1|_782_411	782	411	-	Multimodular transpeptidase-transglycosylase (EC 2.4.1.129) (EC 3.4.-.-)		FIG00000011	ff	atgtcgctgggcaccgcctcgctgacgccgctgtcggtggcgcgcggctacaccgtgttcgccaacggcggctcgctggtcaacacctggatcatcgacaaggtcaccgaccgcgatggcaaggtgctgttccaggagcatccgctgaccgcgtgccgcagttgcggcagcgtcggcggcaatgccgcgccggtcagccaggtggtggacggcttcaacttcggcgcggccacgcccgccgccggcggccaagccgtccgcgaccgccgccacgccgggccgcggacgaaaagaccccggccatcgatccggaggccaaggtcgcaccgcgcgccatcgacgagcgcaccgcttatcaattggtgtcgatga	MSLGTASLTPLSVARGYTVFANGGSLVNTWIIDKVTDRDGKVLFQEHPLTACRSCGSVGGNAAPVSQVVDGFNFGAATPAAGGQAVRDRRHAGPRTKRPRPSIRRPRSHRAPSTSAPLINWCR
gi|348021760|gb|AGHY01002497.1|	fig|487527.6.peg.258	peg	gi|348021760|gb|AGHY01002497.1|_180_344	180	344	+	hypothetical protein				gtgctggacggacaggtgcagatgcgctggcgcgtgcacggcgtcgagcagacggcattgctgcaggccggcgacgtgttccatgcgcccgagggtaccgagcacgtggcgcacccgcagggcgcggcgcgggtgctggtggtggagcgcgacggcagtccgtga	MLDGQVQMRWRVHGVEQTALLQAGDVFHAPEGTEHVAHPQGAARVLVVERDGSP
gi|348021762|gb|AGHY01002496.1|	fig|487527.6.peg.259	peg	gi|348021762|gb|AGHY01002496.1|_412_119	412	119	-	hypothetical protein				gtgcgggtgctcgacaacctgtgcgcgcaggtgcacggcgccaatgccacgcggcccgattatctgtccgcgcaggtggaactgatcgtcggcgacgtctgcgatccggcgacggtgcgcgatgcgctgcaggacgtgggacggcgtgttccatctcgccgccgcggtcggcgtgggccagagcatgtaccagatcgcccactacacccacaccaacaacctcggcaccgcggtgctgctggaagccttggtggagcggccggtgcacgcggctggtggtggcgtcgagcatga	MRVLDNLCAQVHGANATRPDYLSAQVELIVGDVCDPATVRDALQDVGRRVPSRRRGRRGPEHVPDRPLHPHQQPRHRGAAGSLGGAAGARGWWWRRA
gi|348021762|gb|AGHY01002496.1|	fig|487527.6.peg.260	peg	gi|348021762|gb|AGHY01002496.1|_832_527	832	527	-	dTDP-glucose 4,6-dehydratase (EC 4.2.1.46)		FIG00030688	idu(3);dTDP-rhamnose_synthesis idu(3);Rhamnose_containing_glycans idu(3);CBSS-296591.1.peg.2330	gtgcaactgatgcgcggcccgcgtggcttcaccggcccggtcaacctcggcaatccgcacgagatcaccgtggccgagctggcgcagcggatcctggcgctgaccggctcgtcctcgcgcatcgtgcgccggccgatgcccaaggacgacccgacccggcgctgcccggacatcggcctggcgcggcgcgaactcggctgggagccacgggtggcgctggacgacggcctgcgccgcaccatcgcctggttccaggcgcatctgcacgacatcccggaactggaggtgcaacgtgactgtgcatga	MQLMRGPRGFTGPVNLGNPHEITVAELAQRILALTGSSSRIVRRPMPKDDPTRRCPDIGLARRELGWEPRVALDDGLRRTIAWFQAHLHDIPELEVQRDCA
gi|348021764|gb|AGHY01002495.1|	fig|487527.6.peg.261	peg	gi|348021764|gb|AGHY01002495.1|_301_5	301	5	-	FIG01209899: hypothetical protein		FIG01209898	ff	gtggttagcgccgccggcaacaacgccgcccgcaccatgctgctgcgcgacgtgcacaacctgcgcgattgcctggggcgcttcgcccccgagctcaacgccacccattacggcgaggagatgtgggcgctgtacgagaagggcacgctgcgcccggacagcgcgctcaccggccgcttcgccttcgatacccgccgtgccgagcgtgcgcgcggtgcgcgcctcgatcgaggacgcgcgggcaggaggccatcatccgccagcagggccgccgaggccgccgcgcaggacgactag	MVSAAGNNAARTMLLRDVHNLRDCLGRFAPELNATHYGEEMWALYEKGTLRPDSALTGRFAFDTRRAERARGARLDRGRAGRRPSSASRAAEAAAQDD
gi|348021764|gb|AGHY01002495.1|	fig|487527.6.peg.262	peg	gi|348021764|gb|AGHY01002495.1|_866_294	866	294	-	FIG01209899: hypothetical protein		FIG01209898	ff	atgaagattcctccgagcctgcagccgttgatcgacgatggcgtcatcgacggcgtgctgcgcccgctcaagagcggcaaggaggccgcggtctacgtggtccaggccggcgacgacgtgctctgcgccaaggtctacaaggacatggcgcagcgcagcttccaggcgcgcgtgcagtaccaggaagggcgcaaggtgcgcggcagccgccaggcgcgggcgatcgggaaggccagcaagttcggccgccgcgagcaggaagcggcgtggaaggacaccgaggccaacaccctgtaccagttggtggatgccggcgtgcacgtgccgcagccgcgcggctatttccacggcgtgctgctgatggacctggtcaccgacgccgacgggcagagcgcgccg…	MKIPPSLQPLIDDGVIDGVLRPLKSGKEAAVYVVQAGDDVLCAKVYKDMAQRSFQARVQYQEGRKVRGSRQARAIGKASKFGRREQEAAWKDTEANTLYQLVDAGVHVPQPRGYFHGVLLMDLVTDADGQSAPRLSEVELEPGAGAGLPRTAGRRRGQDAVPGPGPRRPVRIQRAGRCRRPGGDRFPAGG
gi|348021764|gb|AGHY01002495.1|	fig|487527.6.peg.263	peg	gi|348021764|gb|AGHY01002495.1|_921_1178	921	1178	+	hypothetical protein				gtgcccggcgcatcggtgcggcgtcgcgggtgtcgcgaacgcgccgaagctgcgtccggtgcggcctgcggcctgtgcgacgcacgagatgcggcgcgcaagcgtccggcatttgtctacgacgtccgccgaggcgtgccgctgcgttcagcgatcgagacggtggcgcggctgtcgtgctgtgtgccgcgagggcgcgcgcgcgttgcctgggtcgatggttggagaggcgctcgacggctatcgcgtcgggactga	MPGASVRRRGCRERAEAASGAACGLCDARDAARKRPAFVYDVRRGVPLRSAIETVARLSCCVPRGRARVAWVDGWRGARRLSRRD
gi|348021766|gb|AGHY01002494.1|	fig|487527.6.peg.264	peg	gi|348021766|gb|AGHY01002494.1|_537_85	537	85	-	Beta-lactamase (EC 3.5.2.6)		FIG00000747	idu(2);Beta-lactamase idu(2);Tn552	gtgactcgcttcctgcgtgcgctgggcgacgcgcagacccgcctggaccgcaacgagccaagcatgaacgacgtcgtcgccggcgatctgcgcgacaccaccacgccggcggcgatggccgcgacgatgcgcactctgctgctcggcgaggcgctgcagcccgcgtcgcggcagcgcctgatcggctggatgcgcgacaaccgcaccggcaacgactgcttgcgtgccggcctgccggcggattggcggatcggcgacaagaccggcagcaacggcaccgatacccgcaacgacatcgccatcgtgtgggcgccggggcgggccacgccgctgttgctcaccgcgtatctcaacggcgcgaccgtcgacagcgccgcgcgcgatgcggcgctgaaagcg…	MTRFLRALGDAQTRLDRNEPSMNDVVAGDLRDTTTPAAMAATMRTLLLGEALQPASRQRLIGWMRDNRTGNDCLRAGLPADWRIGDKTGSNGTDTRNDIAIVWAPGRATPLLLTAYLNGATVDSAARDAALKAVAQAVVASLPAQTLRTG
gi|348021768|gb|AGHY01002493.1|	fig|487527.6.peg.265	peg	gi|348021768|gb|AGHY01002493.1|_518_81	518	81	-	FIG006611: nucleotidyltransferase		FIG00006611	ff	atgcgaccgctgaccgcgcacacgcccaagccgctgctggcggtgggcggcacgccactgatcgtctggcacctgcgcaagcttgccgcgctcggcgtgcgcgaggtggtgatcaacacctcctggctggccgaacagttcccgcagacgcttggcgacggcagcgcgttcgggctgcgcatcgcctattcctacgaaggcgccacgccgctgcgaaaccggtggcggcatgcttcacgcgctgccgctgctcggcgaggcgccgttcctgctggtcaacggcgacatctggaccgacttcgatttcggcccggctggcgccggagccgcccggcctggcgcaactggtgctggtggacccaccggcctatgccgcgcacggcgatttcgccctgcagg…	MRPLTAHTPKPLLAVGGTPLIVWHLRKLAALGVREVVINTSWLAEQFPQTLGDGSAFGLRIAYSYEGATPLRNRWRHASRAAAARRGAVPAGQRRHLDRLRFRPGWRRSRPAWRNWCWWTHRPMPRTAISPCRTTGASATPATCC
gi|348021772|gb|AGHY01002491.1|	fig|487527.6.peg.266	peg	gi|348021772|gb|AGHY01002491.1|_68_355	68	355	+	S-adenosylmethionine:tRNA ribosyltransferase-isomerase (EC 5.-.-.-)		FIG00000334	isu;Queuosine-Archaeosine_Biosynthesis isu;CBSS-211586.1.peg.2832	gtgaaaaagtccgatttccactacgacctgcccgaagacctgatcgcgcaagcgccgctggccgagcgctcggccagtcgccctgctgctggtgccaccggcaccggcgcccttcgccgaccgccacgtgcgcgacctgccggagttgctgcgtgccggcgatctgctgatcttcaacgacacgcgggtgattccggcgcggttgttcgggcagaagagcaccggcgggcgggtcgagatcctgatcgagcggctgctcggcggccaggcgcgcgcgggcgcagttag	MKKSDFHYDLPEDLIAQAPLAERSASRPAAGATGTGALRRPPRARPAGVAACRRSADLQRHAGDSGAVVRAEEHRRAGRDPDRAAARRPGARGRS
gi|348021780|gb|AGHY01002487.1|	fig|487527.6.peg.267	peg	gi|348021780|gb|AGHY01002487.1|_244_74	244	74	-	hypothetical protein				ttggcacgactacggcaaggagccgcgcgagggccgcaaggtcggccacgccaccctgccgcgaggacacgccggaggcgctggcgcaggctctgcagaccggtgggcgcgcaactgcagcgcgacgcccaggtgaccccggtgatcgccgccctgcgcggccagcgctga	MARLRQGAARGPQGRPRHPAARTRRRRWRRLCRPVGAQLQRDAQVTPVIAALRGQR
gi|348021782|gb|AGHY01002486.1|	fig|487527.6.peg.268	peg	gi|348021782|gb|AGHY01002486.1|_624_70	624	70	-	Putative OMR family iron-siderophore receptor precursor		FIG00006288	idu(1);Ton_and_Tol_transport_systems	gtgttcgaggccaagcaggacaactacgcggtgcgcgacatgacccagccggaagcctcgctgcccgacggcagctcggcctacatcggcgtcgacggcaccaagagccgcggctgggaagtggaatacaacggcgaactgcgtccgggctggacgctcaatgccggctacacccacgccaaggtcacccgcgcgcccaccgacgcgatctacgccaacctgccggaggactatctgcagctgtccacccaggtgcgcctgcccggcgcctggcagcgcctgagcctgggcggcggcgtgagctggcagagcgcggtgcgcggctacaacatccagcgcccggtcggcgacggcagtgccgccacgcgcccggtcaccgtggtgcaggacccgtacgcg…	MFEAKQDNYAVRDMTQPEASLPDGSSAYIGVDGTKSRGWEVEYNGELRPGWTLNAGYTHAKVTRAPTDAIYANLPEDYLQLSTQVRLPGAWQRLSLGGGVSWQSAVRGYNIQRPVGDGSAATRPVTVVQDPYALVHFNANYQLSTQWTATLAVTNALNKKYWANLDYQNYGEPRFVSFTLRWRY
gi|348021784|gb|AGHY01002485.1|	fig|487527.6.peg.269	peg	gi|348021784|gb|AGHY01002485.1|_40_273	40	273	+	hypothetical protein				atgcgccggctcggcgcgatctccaacatggcgtgcgcggccggcttgctggcggcgatcctgcacatctaccgcaacgacgtgaacgcgcgcatttcgctggagcgggagttggcgcgtgcggtcggcaacagcgagatcgaggtgttgtaccagccgcaggtcaacgcgcacggccatatgctcggggccgaggcgctggtgcgctggcggcaccccagcggaagctgctga	MRRLGAISNMACAAGLLAAILHIYRNDVNARISLERELARAVGNSEIEVLYQPQVNAHGHMLGAEALVRWRHPSGSC
gi|348021786|gb|AGHY01002484.1|	fig|487527.6.rna.3	rna	gi|348021786|gb|AGHY01002484.1|_156_228	156	228	+	tRNA-Thr-TGT				gccgctttagctcagtcggtagagcaactgtcttgtaaacagtaggtcatccgttcgattcggataagcggca
gi|348021790|gb|AGHY01002482.1|	fig|487527.6.peg.270	peg	gi|348021790|gb|AGHY01002482.1|_306_103	306	103	-	Amino acid permease in 4-hydroxyproline catabolic gene cluster		FIG00006898	isu;Proline,_4-hydroxyproline_uptake_and_utilization	gtgcgcggcgtgctgtggctgatcgtgttcttcgcgctggtgctggtggtgtcgcggctgggcaccttcggtggcagcggctggatcgcgcatccctgggacacgctgtgcgtggcggcgatcgcgctgggctgctatcactggggcgcgcgcagcggcctgcgcccggaggaactggcgctggaagaggacgacggggaatag	MRGVLWLIVFFALVLVVSRLGTFGGSGWIAHPWDTLCVAAIALGCYHWGARSGLRPEELALEEDDGE
gi|348021794|gb|AGHY01002480.1|	fig|487527.6.peg.271	peg	gi|348021794|gb|AGHY01002480.1|_400_86	400	86	-	Molybdenum cofactor biosynthesis protein MoaE		FIG00018405	ff	gtgcggtcgacggcctgcactacgaggcctacgccgcgctggccgaggctgaaggccagcgcatcgtcgacgaggcgctggcccgcttcggccatcctcgagctgcgctgcgtgcaccgcgtcggcgaactggcgatcggcgacctggcggtctgggtcggcgtggtcgctgcgcaccgtggcgccgcgttcgatgcctgccgctacgtcatcgacgaggtcaaggcgcgcgtgccgatctggaagcgcgaacgctatcgcgacggcgacgcgggatggctgcatccggagacgcaggcggcgcaaccggattag	MRSTACTTRPTPRWPRLKASASSTRRWPASAILELRCVHRVGELAIGDLAVWVGVVAAHRGAAFDACRYVIDEVKARVPIWKRERYRDGDAGWLHPETQAAQPD
gi|348021798|gb|AGHY01002478.1|	fig|487527.6.peg.272	peg	gi|348021798|gb|AGHY01002478.1|_33_239	33	239	+	Rhodanese domain protein UPF0176, Betaproteobacterial subgroup		FIG00453885	isu;Single-Rhodanese-domain_proteins	gtggtcagcttctgcacaggcggcatccgctgcgaaaaggccgcgctgtggatgcgcgccgatggcatggacaacgtgctgcaactggacggcggcatcctcggctacttcgaggaggtgggcggcgacggctacgagggctgctgcttcgtcttcgacgaacgcgtggcgctggatccgcagttgcggccgctggtgggcggctga	MVSFCTGGIRCEKAALWMRADGMDNVLQLDGGILGYFEEVGGDGYEGCCFVFDERVALDPQLRPLVGG
gi|348021800|gb|AGHY01002477.1|	fig|487527.6.peg.273	peg	gi|348021800|gb|AGHY01002477.1|_372_28	372	28	-	Probable low-affinity inorganic phosphate transporter		FIG00009601	idu(1);Phosphate_metabolism	gtgctgacctgcgcggtggtgatggccgccggcaccgcctccggcggctggaagatcatcaagaccctgggccacaagatggtcaagctgcatccgatccatggcttcgccgcggagaccagctcggccacgatcctgaccctggccgcgcacttcggcatgccggtgtccaccacccacagcatctccaccgcgatcatgggcgtgggctttgccaagaacccgcgctcgctgcgcttcggcgtcatcgaacgcatcgtctgggcctggatcctgaccatccccgccgccgccggcgtggcgtatctgattttccgcggattcgcgctggctgggtgggtgtga	MLTCAVVMAAGTASGGWKIIKTLGHKMVKLHPIHGFAAETSSATILTLAAHFGMPVSTTHSISTAIMGVGFAKNPRSLRFGVIERIVWAWILTIPAAAGVAYLIFRGFALAGWV
gi|348021808|gb|AGHY01002473.1|	fig|487527.6.peg.274	peg	gi|348021808|gb|AGHY01002473.1|_588_127	588	127	-	C-type cytochrome biogenesis protein				atgagcactcccatcgcacggacgcgccggcgtacgccgtggtggcggctgctggtgctgctgtggctgctgggcggtgcagtgccggggctggcccaggcggtggacccgctgccgttcaaggaccgcgcgcaggagcagcgcttccagcacctgaccgcgcaactgcgctgcctggtctgccagaacgagaacctggccgattccgaccgcgaccctggcgcgcgacctgcgccaccaggtattcgcgcgaactccaggccgggcgcagcgatgcgcagatcaagcagtacatggtcgatcgctactcggcctttcgtgctgtacgccccgccgctggcgccgggtacctggctgctgtggttcgggccggcgctgttgctgctgggtggcgccggc…	MSTPIARTRRRTPWWRLLVLLWLLGGAVPGLAQAVDPLPFKDRAQEQRFQHLTAQLRCLVCQNENLADSDRDPGARPAPPGIRANSRPGAAMRRSSSTWSIATRPFVLYAPPLAPGTWLLWFGPALLLLGGAGMVVATAAPAPSRHRHRGSGA
gi|348021820|gb|AGHY01002467.1|	fig|487527.6.peg.275	peg	gi|348021820|gb|AGHY01002467.1|_901_68	901	68	-	TonB-dependent receptor		FIG00004179	icw(1);Ton_and_Tol_transport_systems	gtgttcctgaactaccgcccgggcaacggcaatgcggtgtaccgcgcctcggtgtggaccagctacacccggccggcgctggtgcagctcggcggcggcgccaactacgacgtctccagcgacggcaccacggtcatcaccgagggcaacccggacctgaagccgatcaagtcgctcaacgtggacctgtccggcgagtgggacaacggccatggcggccacgcgatgctggccggctactacaagcgcctgaccgactacatctacgagagcggctcggatccagccaatgccggcagcagcaccggcgccggcaacgtgcgctacgtgcgtccgcagaacggcggcgacggcaaggtgctcggcgtcgaagccgcggtgcggcagaccctgcagggc…	MFLNYRPGNGNAVYRASVWTSYTRPALVQLGGGANYDVSSDGTTVITEGNPDLKPIKSLNVDLSGEWDNGHGGHAMLAGYYKRLTDYIYESGSDPANAGSSTGAGNVRYVRPQNGGDGKVLGVEAAVRQTLQGMPAPLDGFGIGANVTRQTTRVDLGMDGFHDERIQNAPDLMANAEVFYEKGPLSVNLAYHYSGEYVSVYDYYNRGATWDDLWVKPITRVDLHVGYTFNEHLRADLSVANLTNRLSYWAHVGRNSTAISDIVDAGRTALLNVKYTF
gi|348021820|gb|AGHY01002467.1|	fig|487527.6.peg.276	peg	gi|348021820|gb|AGHY01002467.1|_1602_892	1602	892	-	TonB-dependent receptor		FIG00004179	icw(1);Ton_and_Tol_transport_systems	gtggaccagtacgcctccacccagttcccgtacggcggcgccagcaccttctccggctacgacagcgacggcttccccaagccgctgctgaccccggcgatccaggcccaggccagcgacatcggcagcctgtatgcgcgccgctacggccagctgaccaagtcctacagcggccagaccaagggcggcgccaagttcgacgtgcgctacgacttcgaccagggcgcgctgagcaacatccagttcggcgtgaagtacgtcgacagctcccgcgacttcacctcgcgcgactggaccaacagcaagttcaccgacggcaccctgctgcgcgacaccggcctggtggtcggccagtacgactcggtgtacccgggcaagtacgcgtggccgacggtcaag…	MDQYASTQFPYGGASTFSGYDSDGFPKPLLTPAIQAQASDIGSLYARRYGQLTKSYSGQTKGGAKFDVRYDFDQGALSNIQFGVKYVDSSRDFTSRDWTNSKFTDGTLLRDTGLVVGQYDSVYPGKYAWPTVKLSNGGLKAMIAQHLTAASFDTCGSLAINNQNCATMRGDEAVTSAYAMATFRSGDLEVIRACASSTPASATRSGPCPKTPTATNCPASSAATVPATMCRCRACS
gi|348021826|gb|AGHY01002464.1|	fig|487527.6.peg.277	peg	gi|348021826|gb|AGHY01002464.1|_1296_91	1296	91	-	3-ketoacyl-CoA thiolase (EC 2.3.1.16) @ Acetyl-CoA acetyltransferase (EC 2.3.1.9)		FIG00000004	idu(2);CBSS-246196.1.peg.364 idu(2);n-Phenylalkanoic_acid_degradation idu(2);Ethylmalonyl-CoA_pathway_of_C2_assimilation,_GJO idu(2);Archaeal_lipids idu(2);Polyhydroxybutyrate_metabolism idu(2);Polyhydroxybutyrate_metabolism idu(2);Isoleucine_degradation idu(2);Fatty_acid_metabolism_cluster idu(2);Lysine_fermentation idu(2);Butanol_Biosynthesis idu(2);Acetyl-CoA_fermentation_to_Butyrate idu(2);Bu…	atgagcaaacagatccaggaagcctacatcgtcgccgccacccgtaccccggtcggcaaggcgcccaagggcatgttccgcaatacccgtcccgacgacatgctggcgcacgtgctgcgcgcggtagtcgcgcaggcgccgggcatcgatacctcgcgcatcgacgacgcgatcatcggctgtgcgatgcccgagggcgagcaaggcatgaacgtggcgcgcatcggcgtgctgctggccggcctgccgaactcggtggccgggcagaccatcaaccgcttctgctcctcgggcatccaggcggtggcgctggctgccgaccagatccgcctgggcaacgccgacctgatgctggccggcggcaccgaatcgatgtcgatggtgccgatgatgggcaac…	MSKQIQEAYIVAATRTPVGKAPKGMFRNTRPDDMLAHVLRAVVAQAPGIDTSRIDDAIIGCAMPEGEQGMNVARIGVLLAGLPNSVAGQTINRFCSSGIQAVALAADQIRLGNADLMLAGGTESMSMVPMMGNKVALSPSVFADDHVAIAYGMGITAEKVAEEWKVSREDQDAFALASHQKAIAAIAAGEFRDEISPYEIVSHQPDLAGNVIALRKKLVDTDEGPRPDSSIEGLAKLRPVFRNGQFGGSVTAGNSSQMSDGAGAVLLASEQAIKDYGLTPLARFVSFSVAGVRPEVMGIGPIEAIPKALKQAGLRKDQLDWIELNEAFAAQSLAVIRDSGLDPSKVNPLGGAIALGHPLGATGAIRTATLVHGLRRHKQKYGMVTMCIGTGMGAAGIIE…
gi|348021836|gb|AGHY01002459.1|	fig|487527.6.peg.278	peg	gi|348021836|gb|AGHY01002459.1|_160_426	160	426	+	3-oxoacyl-[ACP] reductase (EC 1.1.1.100)		FIG00028416	ff	gtggcgttcgacgtggccgaccccgaggccagcgcgcaggcgctggcgacgttgctggaggccggcccgatccaggtgctggtcaacaacgccggcatccacgacgacgcgccgatggcgggcatgagcgcggcgcagtggcacaaggtcatcgacgtctcgctgcacggcttcttccacgtcacccagccgctgcttgctgccgatggcgcgcacgcgctgggggcgcatcgtcagcgtgtcctcggtggcggcggtgctgggtaa	MAFDVADPEASAQALATLLEAGPIQVLVNNAGIHDDAPMAGMSAAQWHKVIDVSLHGFFHVTQPLLAADGAHALGAHRQRVLGGGGAG
gi|348021838|gb|AGHY01002458.1|	fig|487527.6.peg.279	peg	gi|348021838|gb|AGHY01002458.1|_13_213	13	213	+	Pirin-like				gtggcccaacacggtccgttcgtgatgaacacccaggccgagatcgcccaggccatggccgactatcgccgcacccagttcggcggctggccatggcaggacgaggcgccggtgcacggcagcgacccggcccgcttcgcgcgacatccggatgggcgcgaggagcggccggcgccgcacgcggtcgccgccaacggctag	MAQHGPFVMNTQAEIAQAMADYRRTQFGGWPWQDEAPVHGSDPARFARHPDGREERPAPHAVAANG
gi|348021840|gb|AGHY01002457.1|	fig|487527.6.peg.280	peg	gi|348021840|gb|AGHY01002457.1|_1113_64	1113	64	-	5-methyltetrahydropteroyltriglutamate--homocysteine methyltransferase (EC 2.1.1.14)		FIG00000683	idu(1);Methionine_Biosynthesis	atgcgcagcgccgccaggcgcaggcaggcggcgctgcggctgccgctgtatccgaccaccaccatcggctcgttcccgcagaccgagcaggtgcggcaggcgcgtgcgcagcacaaggccggcaagctcgacgatgccgcctacgacgcgttcctggccgccgaaaccgagcgctgcgtgcgtgcgcaggagcagctgggcctggacgtgctggtgcacggcgagttcgagcgcaacgacatggtcgagtacttcggcgagcagctcgacggtttcgccttcacccggcacggctgggtgcagagctacggctcgcgctgcgtcaagccgccgatcatctacggcgacgtgcagcgcccggcgccgatgacgctgcgctggacccagtacgcgcagtcg…	MRSAARRRQAALRLPLYPTTTIGSFPQTEQVRQARAQHKAGKLDDAAYDAFLAAETERCVRAQEQLGLDVLVHGEFERNDMVEYFGEQLDGFAFTRHGWVQSYGSRCVKPPIIYGDVQRPAPMTLRWTQYAQSLTERPMKGMLTGPVTVLQWSFVRDDQERAQTCRQIALALRDEVRDLEAAGIGVIQIDEPAIREGLPLRRADWQAYLDWAVQCFRIAAAGVRDATQIHTHMCYSEFNDIIEAVAAMDADVISIETSRSRMELLDAFVRFRYPNAIGPGVYDIHSPRVPSTQEMVELLEKARAVLDPQQLWVNPDCGLKTRGWAETRNALQAMVAAAQQLRNQHAQAA
gi|348021842|gb|AGHY01002456.1|	fig|487527.6.peg.281	peg	gi|348021842|gb|AGHY01002456.1|_45_272	45	272	+	predicted N-acetylglucosamine kinase, glucokinase-like (EC 2.7.1.59)		FIG00010890	isu;Chitin_and_N-acetylglucosamine_utilization	gtggtcggcgacatggcgctgctgtacggcgtgcagggcggcatctacctggccggcggcttcctgccgcagatcggggcgttcctgtccgcgagcagtttcgtcgagcgctacttgaacaagggcgcgatgcgtccggcgctggagcagatcccggtgaagctggtcgagcacggccagctcggggtgatcggcgcggcgaactggttcctgcagcagcgcgactga	MVGDMALLYGVQGGIYLAGGFLPQIGAFLSASSFVERYLNKGAMRPALEQIPVKLVEHGQLGVIGAANWFLQQRD
gi|348021846|gb|AGHY01002454.1|	fig|487527.6.peg.282	peg	gi|348021846|gb|AGHY01002454.1|_482_24	482	24	-	D-alanine--D-alanine ligase (EC 6.3.2.4)		FIG00000350	ff	gtgttccgcgtgctggccgaggcagacctggcgccggtgcgcgccttcgccgccgactaccacggcgaactgctgatggagcagatggtgcagggcgaggaatacaccgtcggcatcctcggcgacatcgcgctgccgtcgatccgcatcgtccccgccggcgactggtacgactaccacgccaagtacatcgccgaggacacccagtacctgtgcccgggcatggatggcgaggacgaggtccagatccgccagcttgccctgcaggcgttcgccgctgccggctgcagcggctggggccgcgtcgacgtgatgcgcgaccgcgtgcgcggcctgcagctgatcgaggtcaacaccgccccgggcatgaccagccactcgctggtgcccaaggccgca…	MFRVLAEADLAPVRAFAADYHGELLMEQMVQGEEYTVGILGDIALPSIRIVPAGDWYDYHAKYIAEDTQYLCPGMDGEDEVQIRQLALQAFAAAGCSGWGRVDVMRDRVRGLQLIEVNTAPGMTSHSLVPKAAAQLGVDFAGLCWRILEQTL
gi|348021848|gb|AGHY01002453.1|	fig|487527.6.peg.283	peg	gi|348021848|gb|AGHY01002453.1|_12_650	12	650	+	Acid phosphatase (EC 3.1.3.2)				gtgccggaggagcgcggcaacgccgccaccgggttgaagccggcggtggtgatggacgtggacgaaacggtgctggacaactcgccctaccaggcgcggctgatccgcaacggcaaggaatacgacgaggtcacctgggaccagtgggtggccgagaagaaagccaagccgatccccggcgtggtcgatttcaccaaggccgccaccgccaagggcatcaccgtgctgtacgtgaccaaccgcgccgtgcacctgaccgacgcgaccctggccaacctgcgcagcgccggcctgccggtggccgacaacagcgtgttgctgggcctgggcacggtggtcaaggattgcgagcagaacggctcggagaagaactgccggcgcaagctggtcggccagcaa…	MPEERGNAATGLKPAVVMDVDETVLDNSPYQARLIRNGKEYDEVTWDQWVAEKKAKPIPGVVDFTKAATAKGITVLYVTNRAVHLTDATLANLRSAGLPVADNSVLLGLGTVVKDCEQNGSEKNCRRKLVGQQYRVLMQFGDQLGDFAQVVANTPEGRAQLLQQYHDWFGERWWMLPNPSYGSWEPALFNNDFTQSRAARHQAKVQALELAQ
gi|348021850|gb|AGHY01002452.1|	fig|487527.6.peg.284	peg	gi|348021850|gb|AGHY01002452.1|_221_370	221	370	+	hypothetical protein				gtgttcccgacgtggatcggcgtgatgtcgctggccttcgtgttccgcagcggcgcacgcgcgtggctgtggctgggcggtgcgaccgtgctgtgctacgtggcgctgttcctgctcaaggccagccatctcgtgcaggtgacctcatga	MFPTWIGVMSLAFVFRSGARAWLWLGGATVLCYVALFLLKASHLVQVTS
gi|348021852|gb|AGHY01002451.1|	fig|487527.6.peg.285	peg	gi|348021852|gb|AGHY01002451.1|_6_335	6	335	+	Inosine-uridine preferring nucleoside hydrolase (EC 3.2.2.1)		FIG00000527	idu(1);Purine_conversions idu(1);Queuosine-Archaeosine_Biosynthesis	gtgaccctggaggagccggagcgggtggcgctgttcgcccatggcgagccgctgaccgacgcgctggcgcagctctactaccagtggcgcgacaccgaccagccctgggccagtgccaccccgaccctgttcgacgtggtgccggtggcgcagttgctcgacccgggcctgtgccccaccgtgccgctgcgcatcgtggtcgacgacaagggctacacccgcgaggcaccggtggcggacgcgccgggagctgcggccaacgcgcaggtgtgcctggcgctggatcggccgcggctgatcgcgttgtacatgcagcggttactgcgctga	MTLEEPERVALFAHGEPLTDALAQLYYQWRDTDQPWASATPTLFDVVPVAQLLDPGLCPTVPLRIVVDDKGYTREAPVADAPGAAANAQVCLALDRPRLIALYMQRLLR
gi|348021854|gb|AGHY01002450.1|	fig|487527.6.peg.286	peg	gi|348021854|gb|AGHY01002450.1|_195_10	195	10	-	hypothetical protein				gtgcctgcgcatccatatgggcgtgcgcctgcaactgcgggcgcaggacacgatgtcatcccgaccgtggccgacgtggctgggcttcgacacccggtcgggcggcaccggcatcggcctgaagaaccttcgtgcgcaggaggcattcccgcggagctgccggatgacgtcatgcgtcgcggctga	MPAHPYGRAPATAGAGHDVIPTVADVAGLRHPVGRHRHRPEEPSCAGGIPAELPDDVMRRG
gi|348021858|gb|AGHY01002448.1|	fig|487527.6.peg.287	peg	gi|348021858|gb|AGHY01002448.1|_690_457	690	457	-	Phosphoribosylformylglycinamidine synthase, synthetase subunit (EC 6.3.5.3) / Phosphoribosylformylglycinamidine synthase, glutamine amidotransferase subunit (EC 6.3.5.3)		FIG00000820	ff	atgctggacggcccgctcggcggcgctgcgttcaacaacgaattcggccggcccaacctgctcggctatttccgcagcttcgagctgccggagacgcagggacctgacccgcgcctacgacaagccgatcatgctggccggcggcctgggtgcgatcgaccgcgtgcaggtggagaagatcccgctgcagcccggcgatgcggtgatcgtgctcggccggcccggcgatgctga	MLDGPLGGAAFNNEFGRPNLLGYFRSFELPETQGPDPRLRQADHAGRRPGCDRPRAGGEDPAAARRCGDRARPARRC
gi|348021862|gb|AGHY01002446.1|	fig|487527.6.peg.288	peg	gi|348021862|gb|AGHY01002446.1|_257_658	257	658	+	Phospholipase/lecithinase/hemolysin				gtggccgcggcgatctggcagaaggtgaagctcgacggctacaccgagagcaaccccaactccagcgcgctgggctacagcgaccgcgacgtcgagtcgatggtcggccgcatcggctggaaggccagcatcgacgccggcacggtgaagccgtacctgcaggccacctacgaccacgagttcaagaagaaccaggaagccaccgcgtggctgcagaccatgtccgacctgggcgagtacgcggtgccgggcatcgacttcgaccgcaactacgcgtcggtggtgctgggcgcgcggaccaagctgtggggctttgagagcaacgtcggcatcgccaccaccaccggccagtcgcgcgcgcacgacacctcgctgttcgtgaacttcggcggcagcttc…	MAAAIWQKVKLDGYTESNPNSSALGYSDRDVESMVGRIGWKASIDAGTVKPYLQATYDHEFKKNQEATAWLQTMSDLGEYAVPGIDFDRNYASVVLGARTKLWGFESNVGIATTTGQSRAHDTSLFVNFGGSF
gi|348021864|gb|AGHY01002445.1|	fig|487527.6.peg.289	peg	gi|348021864|gb|AGHY01002445.1|_748_176	748	176	-	DNA mismatch repair protein MutS		FIG00000356	idu(1);DNA_repair_system_including_RecA,_MutS_and_a_hypothetical_protein idu(1);DNA_repair,_bacterial_MutL-MutS_system	atgacctccgagaaagtccccgaacacaccccgctgatgaagcagttcttcgccgccaagtccgagtatccggacctattgctgttcttccgcatgggcgatttctacgaactgttctacgacgacgcgcgcaaggccgcgcggctgctggacatcaccctgacccagcgtggcagttccggcggagcaccgattccgatggccggggtgccggtgcatgcctacgagggctatctggcgcggctggtggcgctgggcgagtcggtggcgatctgcgagcagatcggcgatccggccctggccaagggcctggtcgagcgcaaggtggtgcggatcgtcacccccggcacggtgaccgacgaggccttgctggacgagcgccgcgaccccttgctgatg…	MTSEKVPEHTPLMKQFFAAKSEYPDLLLFFRMGDFYELFYDDARKAARLLDITLTQRGSSGGAPIPMAGVPVHAYEGYLARLVALGESVAICEQIGDPALAKGLVERKVVRIVTPGTVTDEALLDERRDPLLMAIARTKQGYGLAWADLAGGRFLVNEVDSEDALEAELARLEAGRAAGARRGPVAGIPA
gi|348021872|gb|AGHY01002441.1|	fig|487527.6.peg.290	peg	gi|348021872|gb|AGHY01002441.1|_24_191	24	191	+	hypothetical protein				gtggcggtcgatggcgatgccgccgatgtcgtgttcctggaactggaagtcgtggccatggcgcggcggccacggcgcgcagcaccgcgaccgcggcggcggcgacttccggaccgatgccgtcgccgggcaggacgacgatgtcagcgtgcatgggtggcctcgtag	MAVDGDAADVVFLELEVVAMARRPRRAAPRPRRRRLPDRCRRRAGRRCQRAWVAS
gi|348021872|gb|AGHY01002441.1|	fig|487527.6.peg.291	peg	gi|348021872|gb|AGHY01002441.1|_751_167	751	167	-	3-isopropylmalate dehydratase small subunit (EC 4.2.1.33)		FIG00000282	ff	gtgatggccgggcttcgccaccctcacctcgcgcagcgtggtgctgcgccagaccaacatcgataccgaccagatcatcccggcacggttcctgtccaccaccgaacgcgccggcctcggccgccacgccttcaacgactggcgctggcaggccgacggcacgccgaacccggagttcgccttcaaccaggcgcacaacgccggccggccagatcctgctggccgggcgcaacttcggctggcggctcctcgcgcgagcatgcgccgtgggcgctgaccgacctgggcctgcgcgccatcgtcagcagcgagatcgccgacatcttccgcaacaacagcctcaagaacggcctgctgccgatcgtgctggccgaggacgacgtgcagacgctgatgcag…	MMAGLRHPHLAQRGAAPDQHRYRPDHPGTVPVHHRTRRPRPPRLQRLALAGRRHAEPGVRLQPGAQRRPARSCWPGATSAGGSSREHAPWALTDLGLRAIVSSEIADIFRNNSLKNGLLPIVLAEDDVQTLMQRPDDELTIDVAARELRTPDGRVYAFPLDAFSQTCLLEGVDEMGYLLLRQPDIERYEATHAR
gi|348021874|gb|AGHY01002440.1|	fig|487527.6.peg.292	peg	gi|348021874|gb|AGHY01002440.1|_65_202	65	202	+	hypothetical protein				gtgctgcgcccgcaggagtacctgggccgcgcgcgtccggacagcgccaccctggcgccgggacagagcgcacagatcgcgttccaggtgcgcgaaccggcggccgagactgcggcattcagtttcgatttccactga	MLRPQEYLGRARPDSATLAPGQSAQIAFQVREPAAETAAFSFDFH
gi|348021874|gb|AGHY01002440.1|	fig|487527.6.peg.293	peg	gi|348021874|gb|AGHY01002440.1|_319_591	319	591	+	DNA-binding protein Fis		FIG00001634	isu;DNA_structural_proteins,_bacterial	ttgaacgccgccaccactcgtcctgactccagtcgcggcgcgccgaagccgccgctgcgcgaacacgtggcgcaatcggtccgccgctacctgcgcgacctcgacggctgcgacgccgacgacgtgtacgagatcgtgctgcgcgagatggagatcccgttgttcgtggaagtgctcaaccattgcgaaggcaaccagagccgcgccgcggcgctgctgggcatccaccgcgccaccctgcgcaagaagctcaaggaatatgggctggcctga	MNAATTRPDSSRGAPKPPLREHVAQSVRRYLRDLDGCDADDVYEIVLREMEIPLFVEVLNHCEGNQSRAAALLGIHRATLRKKLKEYGLA
gi|348021884|gb|AGHY01002435.1|	fig|487527.6.peg.294	peg	gi|348021884|gb|AGHY01002435.1|_250_414	250	414	+	hypothetical protein				gtgttcggcgaaccgatcgcggtggacgccgccgccatcggcgaactgcgcaaccaataccaattcaccgaccagcacctgcgcctgctggagcgcttcgaaagtctgagtccgcgccagcgcgccggcctgctggacctgctcgacacccgcaagtcgcgctga	MFGEPIAVDAAAIGELRNQYQFTDQHLRLLERFESLSPRQRAGLLDLLDTRKSR
gi|348021886|gb|AGHY01002434.1|	fig|487527.6.peg.295	peg	gi|348021886|gb|AGHY01002434.1|_93_599	93	599	+	Potassium-transporting ATPase B chain (EC 3.6.3.12) (TC 3.A.3.7.1)		FIG00046742	isu;Potassium_homeostasis	gtggcgatggtcggcgacggcaccaacgacgcgccggcgctggcccaggccgacgtcggcctggcgatgaactccggcacccaggcggccaaggaggccggcaacatggtcgacctggattcggatccggccaagctgctggcggtggtggaagtgggcaagcagcagctgatcacccgcggcgcgctgaccaccttctcgctggccaacgacgtgtccaagtatttcgcgatcctgccggcactgttcgccgcctcgatcccgcagatggccgcgctgaacgtgatgcacctgtccagcccgaccaacgcggtgctggcggcgctgatcttcaatgcgctggtgatcccggcgctgatcccgctggcgctgcgcggcgtgcgcttcaccccgtcctcg…	MAMVGDGTNDAPALAQADVGLAMNSGTQAAKEAGNMVDLDSDPAKLLAVVEVGKQQLITRGALTTFSLANDVSKYFAILPALFAASIPQMAALNVMHLSSPTNAVLAALIFNALVIPALIPLALRGVRFTPSSATSLLRRNMLIYGVGGVLLPFVGIKAIDLLLVALG
gi|348021888|gb|AGHY01002433.1|	fig|487527.6.peg.296	peg	gi|348021888|gb|AGHY01002433.1|_76_690	76	690	+	DNA topoisomerase III (EC 5.99.1.2) in PFGI-1-like cluster		FIG00229490	ff	atggcctgccaggtcaggtcgctcgatttgaagtcgctgcacaccaaggctccgtccccctacacccagggcgagctcgtcaaggcgatgaagaccgtcgccaagctcgtcaccgatccgcgcctgaagcaaacgctcagggacaccaccggcatcggaactgaggcgacgcgcgcaaacatcatcagtgggctgcttgcacgcgggttcctgctccgaaagggccgcgtggtacgcgcatccgataccgcgatgacactcatcgacgctgttcccgcagcgatcgcggaccccggcacgacggcgatctgggaacaggcgctgcacatgatcgaggcgcgcacgatggacctcgacacgttcgtctcgaagcaggccgcatgggtttcgcagctggtc…	MACQVRSLDLKSLHTKAPSPYTQGELVKAMKTVAKLVTDPRLKQTLRDTTGIGTEATRANIISGLLARGFLLRKGRVVRASDTAMTLIDAVPAAIADPGTTAIWEQALHMIEARTMDLDTFVSKQAAWVSQLVEQHREATLAIRVPAGPPCPLCGAATRKRTGKTGAFWSCSRYPDCKGTVAIDSAEAGRRNGPRKPRAARKLH
gi|348021894|gb|AGHY01002430.1|	fig|487527.6.peg.297	peg	gi|348021894|gb|AGHY01002430.1|_169_50	169	50	-	hypothetical protein				gtgccaccgcctggaacaccgccggtggcgccgctgatccagccggcctggatccacagccagcacatcgtcgccaccagcagcgcgctgcgcagcgcggtcagtgcggcggcggcgtag	MPPPGTPPVAPLIQPAWIHSQHIVATSSALRSAVSAAAA
gi|348021904|gb|AGHY01002425.1|	fig|487527.6.peg.298	peg	gi|348021904|gb|AGHY01002425.1|_557_387	557	387	-	hypothetical protein				gtggtgctgcggcaccagcaggacgacgcgtcgcgctccgcgcagccggatgcgcagcgcggcgcgcagtaccaggcgcactaccaggccttccagcggcatctgcaggcccatcggcccgctgtacgccgcgtgatttcctttcccccgcaacgcaccaggacttcgtga	MVLRHQQDDASRSAQPDAQRGAQYQAHYQAFQRHLQAHRPAVRRVISFPPQRTRTS
gi|348021906|gb|AGHY01002424.1|	fig|487527.6.peg.299	peg	gi|348021906|gb|AGHY01002424.1|_161_304	161	304	+	hypothetical protein				atgccgactacagttcgctgcgcaacgggcactacgcagaacgtgcagatggcgttgccggccacgggcagctacttcttccgcctggtcggcggcaacggcggctacgccaacgtgacgctatcggtgagctactcggagtga	MPTTVRCATGTTQNVQMALPATGSYFFRLVGGNGGYANVTLSVSYSE
gi|348021908|gb|AGHY01002423.1|	fig|487527.6.peg.300	peg	gi|348021908|gb|AGHY01002423.1|_16_276	16	276	+	hypothetical protein				gtgccgaccgagaccaaggccgcgccgccactgaccctgctgcggcaggcgatcgaggaagcctccgacgaccagggctgggccggactcggcagcgtcggcagctacctgaacaaggtgcggccggatttcgatccgcgccctgtacgggcacaagaagctcagcgacctgctgcgccggctgtcgtcgcacttcgaactggaggagcgcggcaacgaaggcgggcggcaagcgcatcttcgtgcgctcgcgcgggatga	MPTETKAAPPLTLLRQAIEEASDDQGWAGLGSVGSYLNKVRPDFDPRPVRAQEAQRPAAPAVVALRTGGARQRRRAASASSCARAG
gi|348021908|gb|AGHY01002423.1|	fig|487527.6.peg.301	peg	gi|348021908|gb|AGHY01002423.1|_305_952	305	952	+	SAM-dependent methyltransferases		FIG01212429	ff	gtgtggcgccgcggcattgcccggcgcatccaggtgcacgacacgatgagcgatcgaccctacgccccgtcctgcgaccgcaaccgcgatccgatcctgcaggtgctgcagcgccagttcgccgaccgccgccgcgtgctggagatcggcagcggcaccggccagcacgcggtgtatttcgccgcggcgctgccgcagctgacctggcaatgcagtgagcgtgccgagcacctgcccggcatcgcgcagtggctggaggcggcggcgctgccgaacacgccgccggcgctggcgctggacgtgcgcgaagggctgtggccgtgcgatggctacgatgcggtgttcaccgcgaacaccttgcacatcatgggctgggacgcggtgcaggcgttcttcgcc…	MWRRGIARRIQVHDTMSDRPYAPSCDRNRDPILQVLQRQFADRRRVLEIGSGTGQHAVYFAAALPQLTWQCSERAEHLPGIAQWLEAAALPNTPPALALDVREGLWPCDGYDAVFTANTLHIMGWDAVQAFFAGVGPLLANSADGVLAVYGPFNDGGAFTSDSNRDFDAWLKARDPASGIRDAEAVDALAQAQGLVLQEDVAMPANNRCLVWRRG
gi|348021910|gb|AGHY01002422.1|	fig|487527.6.peg.302	peg	gi|348021910|gb|AGHY01002422.1|_709_236	709	236	-	hypothetical protein				gtgtgctggtacaccctggtgctgaccgtgccgaccatgaccctgctgtcggtgcggcacctgggcgccgctgcgcctgtggcagcacaccatcgcggtggcggtgctggtggccgccctgtccgcctgggccgtctggaacgccaccggcgcccccggcctgcgcgccagcgaggtgctgggcccgttcggcgcgaccgtggcgctggcgatgttcgtgctgctgccgtggctgcaatgccggctgcagcacgggcgctggcaggcgccgtaccgcgacctgttcgagcatgcctggcagaacgcgctgaccctggcgctggcgctgctgttcgtcggcatctgctggctggtgctgtggctgtggggcgcgctgttcgcgctggtcaagctgaccct…	MCWYTLVLTVPTMTLLSVRHLGAAAPVAAHHRGGGAGGRPVRLGRLERHRRPRPARQRGAGPVRRDRGAGDVRAAAVAAMPAAARALAGAVPRPVRACLAERADPGAGAAVRRHLLAGAVAVGRAVRAGQADPVPRPVPADRLSSTWPPAPCSAWAC
gi|348021926|gb|AGHY01002414.1|	fig|487527.6.peg.303	peg	gi|348021926|gb|AGHY01002414.1|_327_112	327	112	-	mRNA 3-end processing factor		FIG00149005	ff	atgcggctgcgcggcaaccgccgccggcgcaactacgaccgcggcttcgtggtctccgaccatgccgactggcccgacctgctgcgcaccatcgacgaaaccggcgcgcgccgcgtgattgcgacgcacggcaacaccgacgcgatcatccgcgcgctcaacgaacgcggcgtcgccgccgaagcattccgcaccgactacggtggcgaggaatga	MRLRGNRRRRNYDRGFVVSDHADWPDLLRTIDETGARRVIATHGNTDAIIRALNERGVAAEAFRTDYGGEE
gi|348021928|gb|AGHY01002413.1|	fig|487527.6.peg.304	peg	gi|348021928|gb|AGHY01002413.1|_271_591	271	591	+	putative sec-independent protein translocase protein TatC				gtgttcgccgcgcacatcgaggactgggacgcgcacgagcagcagttgtgcgatttctggtcggcgatgctgcgcggaacccgccgcttccacggtgcgccgatgccccggcatatggccatgcgcgaactcagcgccctgctgttccagcgctggctgggcctgttccgcgccaccaccgccgagctgaccaaccagccgatgcgcctgctggccgacgatatcgcccagcgcatcgccgagaccttctggcgccgccaccagatgagctggcgtccgttcgagccggtgtcgccgctgccggccgcgtgcgcggattga	MFAAHIEDWDAHEQQLCDFWSAMLRGTRRFHGAPMPRHMAMRELSALLFQRWLGLFRATTAELTNQPMRLLADDIAQRIAETFWRRHQMSWRPFEPVSPLPAACAD
gi|348021932|gb|AGHY01002411.1|	fig|487527.6.peg.305	peg	gi|348021932|gb|AGHY01002411.1|_7_528	7	528	+	Uridylate kinase (EC 2.7.4.-)		FIG00001819	isu;CBSS-176299.4.peg.1996B isu;CBSS-312309.3.peg.1965	atggaccgggtcaccggcgaccacatgggcatgctcgccaccgtcatcaacgcgctggcgatgcaggacgcgctggagaagctcggcgccaaggtgcgggtgatgagcgcgatcaagatcaacgacgtgtgcgaggacttcatccgccgccgcgcgatccgccatctggaaaagggccgcatcgcgatcttcgccgccggcaccggcaatcccttcttcaccaccgactccggcgcggcgctgcgcgcgatcgagatcggcgccgacctgctgctgaaggcgaccaaggtcgacggcgtctacgacaaggacccgaagaagcaccccgacgcggtgcgcttcgacagcctgacctacgacgaggtcatcgcccgcaacctcgaggtgatggacaccgcc…	MDRVTGDHMGMLATVINALAMQDALEKLGAKVRVMSAIKINDVCEDFIRRRAIRHLEKGRIAIFAAGTGNPFFTTDSGAALRAIEIGADLLLKATKVDGVYDKDPKKHPDAVRFDSLTYDEVIARNLEVMDTAAFALARDSDLPLRIFNMGQPGELLKILRGAEIGTLVKGRG
gi|348021936|gb|AGHY01002409.1|	fig|487527.6.peg.306	peg	gi|348021936|gb|AGHY01002409.1|_12_152	12	152	+	FIG01211220: hypothetical protein		FIG01211219	ff	ttgtgctccaccggcgcgcgctacgccgatgccctgggcaacaccttctggcagtcgcagcccgaccaggccacgctgaccctggcgggcctgggcgagacgctcaaatgcgtccgccacgacagcggcatgaccggctga	MCSTGARYADALGNTFWQSQPDQATLTLAGLGETLKCVRHDSGMTG
gi|348021936|gb|AGHY01002409.1|	fig|487527.6.peg.307	peg	gi|348021936|gb|AGHY01002409.1|_267_1121	267	1121	+	Flagellar motor rotation protein MotA		FIG00000438	ff	atgctcatcatcgttggcttcatcgtcgtcatcatcagcgtggtcggcggctacgtgctgtcgcacggcaaacttggcgcactgtggcagccctacgagctgatgatcatcggtggcgcggccctgggcgcgttcctggtcagcaccccgggcaagatcgtcaaggccaccatcggcggcgtgctgggcgtgttcaagggcccgcagtacaaggccgacgactaccgcagcaccctgaccctgatctacgaactgctgaacaaggcgcgccgcgacggcttcatggccctggaagaccacgtcgagcggccggccgacagcgcgatcttcggcaactaccccaaggtactggccgaccaccacctgctcgacttcattaccgactgcctgcgcctgatg…	MLIIVGFIVVIISVVGGYVLSHGKLGALWQPYELMIIGGAALGAFLVSTPGKIVKATIGGVLGVFKGPQYKADDYRSTLTLIYELLNKARRDGFMALEDHVERPADSAIFGNYPKVLADHHLLDFITDCLRLMIGSNIEPHELEPLLELELEKHHHEAMAPAHALSKVSDGLPGFGIVAAVLGIVITMGSIGGPIEEIGHHVGAALVGTFLGILLAYGFVAPLSAAMEARAEQDRRIFESVKTALLACLRGYNPKIALEFARKTLPTDVRPSFADFETHLKTIK
gi|348021938|gb|AGHY01002408.1|	fig|487527.6.peg.308	peg	gi|348021938|gb|AGHY01002408.1|_61_918	61	918	+	Octaprenyl-diphosphate synthase (EC 2.5.1.-) / Dimethylallyltransferase (EC 2.5.1.1) / Geranyltranstransferase (farnesyldiphosphate synthase) (EC 2.5.1.10) / Geranylgeranyl pyrophosphate synthetase (EC 2.5.1.29)		FIG00000019	isu;Polyprenyl_Diphosphate_Biosynthesis isu;Polyprenyl_Diphosphate_Biosynthesis isu;Polyprenyl_Diphosphate_Biosynthesis isu;Archaeal_lipids isu;Archaeal_lipids isu;Archaeal_lipids isu;Proteorhodopsin isu;Carotenoids isu;Carotenoids isu;Isoprenoid_Biosynthesis:_Interconversions	atgctggtggtgctggccggccgcgcctgcggcgccggcgggccgatgcagcaccagttggcggcgatcatcgaattcatccacacctcgaccctgctgcacgacgacgtggtggacgaatcggacctgcgccgcggccgcagcaccgccaacgccctgtggggcaacgcgcccagcgtcctggtcggcgacttcctgtattcgcgcagcttccagctgatggtggagctggacagcatggcggtgatgcgcctgctggccgacaccaccaaccgcatcgccgagggcgaggtgctgcagctgttgcacgtgcacaacccggacaccgacgaggccgcctacctgcgcgtgatcgagcgcaagaccgcggtgctgttcgccgccggcacccgcctgggc…	MLVVLAGRACGAGGPMQHQLAAIIEFIHTSTLLHDDVVDESDLRRGRSTANALWGNAPSVLVGDFLYSRSFQLMVELDSMAVMRLLADTTNRIAEGEVLQLLHVHNPDTDEAAYLRVIERKTAVLFAAGTRLGALASGASEDVQERLYDYGMQLGYAFQIADDVLDYTADAADLGKNLGDDLAEGKATLPLIHAMAHADDATRARLRQIVEQGDASAMPEVLAAIEASGSIDYSRRRAADYATAAERALDGLPENEAVAALRGLAAVRGVAEALIAGALRAPDWD
gi|348021940|gb|AGHY01002407.1|	fig|487527.6.peg.309	peg	gi|348021940|gb|AGHY01002407.1|_16_387	16	387	+	Beta-glucosidase (EC 3.2.1.21)		FIG01290319	icw(1);Fructooligosaccharides(FOS)_and_Raffinose_Utilization icw(1);Beta-Glucoside_Metabolism	gtgctgaggtcaaccccgtccgggcgcctgccggtgacctggctgcgcgacgtgtcgcaactgccgcggccgtcgattcccggcctgggcttcaagccggcgcaaccgccgggcagcagcgtcgactacaccatcgaaggcgccaacgtcggctaccgctggttcgccgcgcgcggcctggagccggtgtatccgttcggctatggcctgtcctacaccacgttcgcctacgccaacttcaaggtgcaggccgacggtagccgcgtcgtcgccagcttcgacgttgcgcgacaccggcgatcgccgaaggtgccgacgtgccgcagctgtacctgcgcctgccacagggccaccacaccccgatccgcttag	MLRSTPSGRLPVTWLRDVSQLPRPSIPGLGFKPAQPPGSSVDYTIEGANVGYRWFAARGLEPVYPFGYGLSYTTFAYANFKVQADGSRVVASFDVARHRRSPKVPTCRSCTCACHRATTPRSA
gi|348021940|gb|AGHY01002407.1|	fig|487527.6.peg.310	peg	gi|348021940|gb|AGHY01002407.1|_402_593	402	593	+	Beta-glucosidase (EC 3.2.1.21)		FIG01290319	icw(1);Fructooligosaccharides(FOS)_and_Raffinose_Utilization icw(1);Beta-Glucoside_Metabolism	gtgatgctcaagccgggcgagagccgccacgtcagcatcgtcgccgagcccaagaccctggccgacttcgatccgaagaagcgccactggcatatcgccgccggcgactacgagctgctgctgggtcgttcggcgacgcaggtggaggcgcgcgcgccgctgcatctgcagggcggcgtgctgcagcactga	MMLKPGESRHVSIVAEPKTLADFDPKKRHWHIAAGDYELLLGRSATQVEARAPLHLQGGVLQH
gi|348021946|gb|AGHY01002404.1|	fig|487527.6.peg.311	peg	gi|348021946|gb|AGHY01002404.1|_707_123	707	123	-	PE-PGRS family protein				atggcgcaggtcgacgtgaccgtgctggtcagcgcggtcgaacgcgaaccagttgcagcgcgaggcgccgcaggtgcgcacggtgctgatctcgaacctgcacgaggtcgccggtcccggcctgccgtgggcgcagcgccgcgacctggtgttcgtcggcggcttccgccatgcgcccaacgtggatgcggtgcgctggttcctgcaggaggtgttcccggcggtgcgcctgcgcttgccggaggtgcgcttccactgcatcggtgcggacatgccggaggacatccgccgcctcggcgaggccaccgccggcgtcgaactgctcggccacgtccccgacatcgccgcctacatggacggcatgcgcatcgcggtggcgccgctgcgcttcggcgcggg…	MAQVDVTVLVSAVEREPVAARGAAGAHGADLEPARGRRSRPAVGAAPRPGVRRRLPPCAQRGCGALVPAGGVPGGAPALAGGALPLHRCGHAGGHPPPRRGHRRRRTARPRPRHRRLHGRHAHRGGAAALRRGGQGQGQPEHGPWPAGGGHRLRGGRHAPARWRGRADRRRGGGVCRRHRAALRRSGAVAAAGR
gi|348021948|gb|AGHY01002403.1|	fig|487527.6.peg.312	peg	gi|348021948|gb|AGHY01002403.1|_165_368	165	368	+	sensor histidine kinase				atgggcgaccgcgacggcccgagcctgttcgcgcagctgtgcgcacgctggcaggccgagccacgggtgatcctgatcaccgccgaagccgatccggcgttgcgcgccctggcgcaggaacgcggctggggcttcctggccaagccagtccgggccccggccctgcgcgcgctgatgacgcagatgctgctgcggcgtgggtga	MGDRDGPSLFAQLCARWQAEPRVILITAEADPALRALAQERGWGFLAKPVRAPALRALMTQMLLRRG
gi|348021950|gb|AGHY01002402.1|	fig|487527.6.peg.313	peg	gi|348021950|gb|AGHY01002402.1|_12_710	12	710	+	Chromosome partition protein smc		FIG00026918	idu(1);DNA_structural_proteins,_bacterial idu(1);COG1399	gtgatcaacggcctgcccgaacacgccgacccggccgagtgggagcaggcggtgcagcagatcgatgcgcgcatgcgccggctggagccggtcaacctggcggcgatcagcgagtatggcgaggccgcgcagcgcgccgagtacctggaagcgcaggacgtcgacctgaacaccgcgctggagaccctggaagacgccatccgcaagatcgaccgcgagacccgcggccgcttcaaggacactttcgaccgggtcaactccggcgtgcaggcgttgtatccgcgcctgttcggcggcggccacgcctacctggaactgaccggcgaggacctgctggacaccggcgtggcgatcatggcgcggccgccgggcaagcgcgtgtcgagcatctcgctgctg…	MINGLPEHADPAEWEQAVQQIDARMRRLEPVNLAAISEYGEAAQRAEYLEAQDVDLNTALETLEDAIRKIDRETRGRFKDTFDRVNSGVQALYPRLFGGGHAYLELTGEDLLDTGVAIMARPPGKRVSSISLLSGGEKAMTAVALVFAIFQLNPAPFCLLDEVDAPLDEANVGRLAAMVKEMSEKVQFLFVSHNKATMEAAHQLSGVTMREPGVSRLVSVDLEEAARLAGAA
gi|348021952|gb|AGHY01002401.1|	fig|487527.6.peg.314	peg	gi|348021952|gb|AGHY01002401.1|_78_266	78	266	+	hypothetical protein				ttgccgcgcgaaggccaggcgctgtcatgcacgctgagcgtcggcgtggcgcaatggcagcgcggcgagagcgtcgcgacgctgttgcagcgggccgatgccgcgctgtacgccagcaaggccgccggccgcaaccgcgttagcgtgtccaccccccaccgcgccacccaccaggagcctcagccatga	MPREGQALSCTLSVGVAQWQRGESVATLLQRADAALYASKAAGRNRVSVSTPHRATHQEPQP
gi|348021958|gb|AGHY01002398.1|	fig|487527.6.peg.315	peg	gi|348021958|gb|AGHY01002398.1|_9_197	9	197	+	YrbA protein		FIG00002146	isu;Broadly_distributed_proteins_not_in_subsystems	gtgcaggtgcagggcgacgacggcgtgcacttcgaggccaccgtggtcagcgacgccttcgccggcaagctgccgctggcgcgccaccgcatggtctacgccaccctgggcgatctgatgggcggcgcgatccacgcgctggccctgaacaccctgacccccgagcaggccgagcgcgccgacggctga	MQVQGDDGVHFEATVVSDAFAGKLPLARHRMVYATLGDLMGGAIHALALNTLTPEQAERADG
gi|348021964|gb|AGHY01002395.1|	fig|487527.6.peg.316	peg	gi|348021964|gb|AGHY01002395.1|_410_30	410	30	-	Coenzyme PQQ synthesis protein C		FIG00061267	ff	gtgcagggctacctgcacttcgtgcgcgagaagagtctgctcgaggccatcgcctcgtcgctgaccgagctgttcgcgccgggcatcatcagccaccgcgtggccggcatgctgcagcactacgacttcgtctcgcgcgaggcgctggcgtatttcgagcatcgcctgcacgaggcgccgcgcgattcgggacttcgccctggattacgtcaagcgaccacgccgacaccgtggagaagcagcacctggtgcaaaaacgcgctgcgcttcaagtgcggcgtgttgtggtcgcaactggacgcgttgcacttcgcctacgtgcagccgggcgtggcctggccggacgcgttcgcccccgacgccgcgcaggccgcggcatga	MQGYLHFVREKSLLEAIASSLTELFAPGIISHRVAGMLQHYDFVSREALAYFEHRLHEAPRDSGLRPGLRQATTPTPWRSSTWCKNALRFKCGVLWSQLDALHFAYVQPGVAWPDAFAPDAAQAAA
gi|348021966|gb|AGHY01002394.1|	fig|487527.6.peg.317	peg	gi|348021966|gb|AGHY01002394.1|_511_362	511	362	-	hypothetical protein				atgatgctgttgtcggaaaccgcacgtgccgaaggcctgttcgactgggtggcgatgcatgcggtgaatctggccaagggctcgctcccagcgcctgttcgcgctggtgttcggcgtcggcatcgtggtcaccgcgttcctgtccaatga	MMLLSETARAEGLFDWVAMHAVNLAKGSLPAPVRAGVRRRHRGHRVPVQ
gi|348021968|gb|AGHY01002393.1|	fig|487527.6.peg.318	peg	gi|348021968|gb|AGHY01002393.1|_311_132	311	132	-	sal operon transcriptional repressor				gtgtggccggaactcaccaccatccatcaaccgatcgcctcgatggccgatgccgccatcgacatcctgctgcgcagcatccgccacaagcgcgacgacgcgcgcgtgtccagcgaccacgtggtccagcaccggctggtgctgcgcggttcggtcgccagtccgcccaaggggcgctag	MWPELTTIHQPIASMADAAIDILLRSIRHKRDDARVSSDHVVQHRLVLRGSVASPPKGR
gi|348021970|gb|AGHY01002392.1|	fig|487527.6.peg.319	peg	gi|348021970|gb|AGHY01002392.1|_195_58	195	58	-	hypothetical protein				atgacctacctgatcgcgcccgatggcaaggtcgccaagcagttcctggggccggtcaccgcccacgacatcgaaaccgcgatcgccgccgccggcggtccggcgccggggcagggcaaggcgaaggcggcgggctga	MTYLIAPDGKVAKQFLGPVTAHDIETAIAAAGGPAPGQGKAKAAG
gi|348021974|gb|AGHY01002390.1|	fig|487527.6.peg.320	peg	gi|348021974|gb|AGHY01002390.1|_60_392	60	392	+	hypothetical protein				atgagccgccacctgctgttcgtgtgcagccgcaaccggctgcgcagccctaccgccgagcaggtgttcgccacctggcccggcgtggaaaccgcctcggccggcgtcgaccacgacgcggataccccggtcaccccggaattgctggagtgggcggacatcgtcttcgtcatggaaccggcgcatcgcgccaagctgtcgcgccggttcaagcgccacctcggccgcgcacgcatcgtctgcctcgacatccccgacgactacggctacatggatccggcgctggtgcaggtgctgaccgcgaaggtgtcgcggcacctgccggtgcgctga	MSRHLLFVCSRNRLRSPTAEQVFATWPGVETASAGVDHDADTPVTPELLEWADIVFVMEPAHRAKLSRRFKRHLGRARIVCLDIPDDYGYMDPALVQVLTAKVSRHLPVR
gi|348021982|gb|AGHY01002386.1|	fig|487527.6.peg.321	peg	gi|348021982|gb|AGHY01002386.1|_134_388	134	388	+	BatD				atggtgttggccgcgctgctgctggcgctgccggcgggcgccgccacgcgcgcgtggctggatcgtaacaacgtcggcgccggcgagggcgtgactctcaacatcgagaccgaccaggcgacggcgaccccggactacacgccgctgcgcgcggatttcgcggctcagcaacgaggtcaagagccggcagatgcagatcgtcaacggcgcggtctcggcgaagtccctgttcggcgtgatcctgaccccgcgtag	MVLAALLLALPAGAATRAWLDRNNVGAGEGVTLNIETDQATATPDYTPLRADFAAQQRGQEPADADRQRRGLGEVPVRRDPDPA
gi|348021982|gb|AGHY01002386.1|	fig|487527.6.peg.322	peg	gi|348021982|gb|AGHY01002386.1|_369_818	369	818	+	BatD		FIG00009446	ff	gtgatcctgaccccgcgtagcaccggcacgctggagatcccgtcgctgcaggtcggcaacgagcgcaccgcgccattgcggttggaggtgggcgcggccagcgccgcggcgcccgccaccgccaccgccgatgtgccggcgcaagtgggcaacgccgatgtgttcgtgcagaccgtcgtcgacgacgcgcagccctatgtgcagcagagcgtgggcgtggtggtgcggctgtatctcggcgtgccgctgagttccggcgaactggacctggacgcaccggcgggcggcgtcgttgcagcgcgtcggcgacgatatccagaaccgccgccagatcgacggacgcatgtacaccgtggtcgagcggcattacctgctggtccccgaacgcagcggaccgct…	MILTPRSTGTLEIPSLQVGNERTAPLRLEVGAASAAAPATATADVPAQVGNADVFVQTVVDDAQPYVQQSVGVVVRLYLGVPLSSGELDLDAPAGGVVAARRRRYPEPPPDRRTHVHRGRAALPAGPRTQRTAAVAGRAFQRSWPHRFL
gi|348021984|gb|AGHY01002385.1|	fig|487527.6.peg.323	peg	gi|348021984|gb|AGHY01002385.1|_5_547	5	547	+	Adenosylhomocysteinase (EC 3.3.1.1)		FIG00000858	idu(1);Methionine_Biosynthesis	ttgcaggcccatgcccggcactgcccggatcaggccgaggtcgccgcgcagttcctggccttgctggacgatgccgccgatccgttcgtgcgcgcacgcctggagggccatttcaccggctcggcctggctggtcagcgccgacggtatgcgcaccttgctgacccatcaccgcaagctgcagcgctggctgcaactgggcgggcacgccgacggcgaccgcgatctggcgcgggtggcgctgaaagaggccgaggaggagtcgggcctgcctggcctggtgctggaggatggcgcgctcttcgacctggaccggcactggattccggagcggggcgacgtgcctgggcactggcattacgacgcacgctacgtggtccgtgccggcgccgacgaggcc…	MQAHARHCPDQAEVAAQFLALLDDAADPFVRARLEGHFTGSAWLVSADGMRTLLTHHRKLQRWLQLGGHADGDRDLARVALKEAEEESGLPGLVLEDGALFDLDRHWIPERGDVPGHWHYDARYVVRAGADEAFAVSAESLALAWRPIAELLDEADLDPSLQRMARKWLQRQAPLPPGEG
gi|348021986|gb|AGHY01002384.1|	fig|487527.6.peg.324	peg	gi|348021986|gb|AGHY01002384.1|_26_469	26	469	+	hypothetical protein				gtgtccgccgccccgcgcgcggacctccccctgaagaccaccgaccgagtaactgcccgtgacccaggactacaaagccaccctccatctgccggcgaccgagttcccgatgcgcggcgacctgcccaagcgcgagccggacatcctggcgcgctgggagaacgagggcctgtacacgaagctgcgcgacaacgcccagggccggccgctgttcgtgctgcacgacggcccgccctacgccaatggcgcgatccacctcggccatgcggtcaacaagatcctcaaggacatcattgtcaagtccaagtacctgtccggcttcgatgcgccgtacatcccgggctgggattgccatggcctgccgatcgagatcgcgatcgagaagaagttcggcaaggt…	MSAAPRADLPLKTTDRVTARDPGLQSHPPSAGDRVPDARRPAQARAGHPGALGERGPVHEAARQRPGPAAVRAARRPALRQWRDPPRPCGQQDPQGHHCQVQVPVRLRCAVHPGLGLPWPADRDRDREEVRQGRGQAGCGAVPAEVP
gi|348021990|gb|AGHY01002382.1|	fig|487527.6.peg.325	peg	gi|348021990|gb|AGHY01002382.1|_525_298	525	298	-	FIG01211262: hypothetical protein		FIG01211261	ff	atgaagccatcgctgttccgtctgggcctgaacctgtggccgccgttcctgttcgccggcatccatgtgaccgcgctgagcgccgactaccgccacgcgcgggtcgaactgcgcatgcgcccgtggaaccgcaactacgtcgggacgcatttcggcggcagcctgttcgccatgaccgacccgttctggatgctgctgaccatgcagaacctgggacgcgactactag	MKPSLFRLGLNLWPPFLFAGIHVTALSADYRHARVELRMRPWNRNYVGTHFGGSLFAMTDPFWMLLTMQNLGRDY
gi|348021990|gb|AGHY01002382.1|	fig|487527.6.peg.326	peg	gi|348021990|gb|AGHY01002382.1|_707_522	707	522	-	hypothetical protein				gtgcacagcgccacggcgacagcgttcacgtccgagcgcgcctttttcgaatctgccgacgccgcgctgtaccgggtcaagcgcggcggacgcgacggctacgcgctcagcgacgcgccgccagagcaccatacgcatgcgtctggtaccctgccgcgctccgatccacccacggccgcgcaatga	MHSATATAFTSERAFFESADAALYRVKRGGRDGYALSDAPPEHHTHASGTLPRSDPPTAAQ
gi|348021994|gb|AGHY01002380.1|	fig|487527.6.peg.327	peg	gi|348021994|gb|AGHY01002380.1|_486_70	486	70	-	FIG01210302: hypothetical protein		FIG01210301	ff	atgccccgaacgcgccggtgttcggcccgcccggctcggccgatctgggtgctgaccttccgcaacgtgcacaactggcgcatggccggccaggccgagggcatgttcaagggcttctaccaagtgctcaagcccggcggcgtgctcggcgtggtcgagcaccgcgccaaggccgacgtgccggcggacgacaagagcggttatgtcggccaggggcaggtgatcgccatggccgaggcggccggcttcaagctggccggcaagagcgaggtcaacgccaatccacgcgacagcaaggactatcctggcggcgtgtggacgctgccgccgagcaaccagcacgaggccgccgacgacgccaagtaccaggcgatcggcgagagcgaccggatgaccctg…	MPRTRRCSARPARPIWVLTFRNVHNWRMAGQAEGMFKGFYQVLKPGGVLGVVEHRAKADVPADDKSGYVGQGQVIAMAEAAGFKLAGKSEVNANPRDSKDYPGGVWTLPPSNQHEAADDAKYQAIGESDRMTLKFVKR
gi|348022000|gb|AGHY01002377.1|	fig|487527.6.peg.328	peg	gi|348022000|gb|AGHY01002377.1|_669_73	669	73	-	integral membrane protein		FIG00963084	ff	ttgaccgtcgccggactggcgctgtcgctggcctgcaacctgcagttcactctggtgctgctggcctattacgtgatgacgctggcctattcgctgcggctcaagcgcatcgtgatgatcgacgtggtgctgctggcggcgctgtacaccgtgcgcatcatcggcggcgcggtggccatcgacctggagctgtcgttctggctgctcgcgttctcgatgttcattttcctctcgctggcgctgctcaagcgctacaccgagttgcacgcaatgctgggcagtggcaagaaaaaggccagcggacgcgcctattcggtggaagaccttgtgctgctgcaatcgatgggcgcggcggccgggtacatcgcggtcatggtcatggcgctgtacatcaacagc…	MTVAGLALSLACNLQFTLVLLAYYVMTLAYSLRLKRIVMIDVVLLAALYTVRIIGGAVAIDLELSFWLLAFSMFIFLSLALLKRYTELHAMLGSGKKKASGRAYSVEDLVLLQSMGAAAGYIAVMVMALYINSPASVELYRHPKLLWLICPVLLYWVSRVWIVAHRGDMHDDPIVFAATDRVSQVVVVLCGLFALSAI
gi|348022004|gb|AGHY01002375.1|	fig|487527.6.peg.329	peg	gi|348022004|gb|AGHY01002375.1|_332_114	332	114	-	hypothetical protein				atggcgcagcacgcggcaccgccgctgttgcatccgctgttccaggatcacgccgtgctgcagcgcgaccggccgatgccggtctgggggcacgccgcgccgggtgccacggtgtcggtgaccttcgcccggcagtcggtcagccgcacgcgccgatgccgacggccgctggcgtgccacgctcaagcccatcgccgcccggtgggccttacgacatga	MAQHAAPPLLHPLFQDHAVLQRDRPMPVWGHAAPGATVSVTFARQSVSRTRRCRRPLACHAQAHRRPVGLTT
gi|348022006|gb|AGHY01002374.1|	fig|487527.6.peg.330	peg	gi|348022006|gb|AGHY01002374.1|_238_813	238	813	+	coagulation factor 5/8 type domain protein				gtgttcgtgcgcttcggcgatgcctactacctgttccagaccctggccgacggctactggcgctccagcaacctgctcgactggcagttcgtcacgcccagccgttggccattcgagagcatcgtcgcgccggcggtggtcgccgacggcgaccgtctggtgatcatgcagtcggccttcgaaccgcgcccgctgctgcagacccgcgacccggccagcggcacgctcgacttcctgacccggctgctgccgaagctgccgcgcgccccagccgatcggcaccgagatgaagggccgcccgctcagcgacgtgccgcccggcccctgggacccggatctgttcatcgacgacgacggccagtggtacctgtactggggctcgtcggaccgctacccgct…	MFVRFGDAYYLFQTLADGYWRSSNLLDWQFVTPSRWPFESIVAPAVVADGDRLVIMQSAFEPRPLLQTRDPASGTLDFLTRLLPKLPRAPADRHRDEGPPAQRRAARPLGPGSVHRRRRPVVPVLGLVGPLPAVRHRHGPQRAGLRLPRARRRRCSRWNRRSTAGSASDPTTAAPASPTAARSAAIWKARG
gi|348022014|gb|AGHY01002370.1|	fig|487527.6.peg.331	peg	gi|348022014|gb|AGHY01002370.1|_160_795	160	795	+	FIG01212518: hypothetical protein		FIG01212516	ff	gtgctggccttggccctggccggcccggcgttcgcgagcgagggcatcagcaaggtcaacggcagcatcaccgccgacgccggaaagcagtacggggatctggaaaccgtcaacggcagcatcaacgtccagtccggcgcccaggtgggcagcgtggaaacggtcaacggcagcgtcaaggtcgccgacggcgcgcagaccaagggtctgtccacggtcaacggcggcatcaccctcggcgagcgcgcgcaggtcgccggttccatcgaaaccgtcaacggcggcatcttcgtcgaccgcggcggccgcgtcgacggcggcatcgagagcgtcaacggcagcatcggcctggtcgccacgcaactggacaagggcatcgagacggtcaacggcgacatc…	MLALALAGPAFASEGISKVNGSITADAGKQYGDLETVNGSINVQSGAQVGSVETVNGSVKVADGAQTKGLSTVNGGITLGERAQVAGSIETVNGGIFVDRGGRVDGGIESVNGSIGLVATQLDKGIETVNGDITVGHDSHVGGGISINKPSFSMSFKPARKPRVIVGPRAVIDGPLRFEREVTLYVHRSAKTGPITGATALPFDGDTAPNN
gi|348022016|gb|AGHY01002369.1|	fig|487527.6.peg.332	peg	gi|348022016|gb|AGHY01002369.1|_15_374	15	374	+	Histone-like protein		FIG01271298	ff	gtgaagaaggtagcgaccaaggccgccgccaaaccggccgctcccaagccgatcaaggacgtgctgagcaagtccgcgctcgtggcgcacatcgccgagaccagcggcgtcatcgccaaggacgtgcgcgccgtgatggcctcgctggagcatgccgtggccggttcggtcagcaagaagggcgccggctcgttcaccctgccgggcctgctgaagatcaccgccgtcagcgtgccggccaagccgaagcgcaagggcatcaacccgttcaccaaggaagagcagtggttcgccgccaagccggccaccaccaagctcaaggtgcgcccgctgaagaagctcaaggacgccgcgctctga	MKKVATKAAAKPAAPKPIKDVLSKSALVAHIAETSGVIAKDVRAVMASLEHAVAGSVSKKGAGSFTLPGLLKITAVSVPAKPKRKGINPFTKEEQWFAAKPATTKLKVRPLKKLKDAAL
gi|348022018|gb|AGHY01002368.1|	fig|487527.6.peg.333	peg	gi|348022018|gb|AGHY01002368.1|_447_866	447	866	+	Na+-driven multidrug efflux pump		FIG01210269	ff	atgcaaaagcccgccacgctgaccgaaggcccgattggccgccagttgttgctgttctcgctgccgatcctggccggcaacatcgcgcagtcgctcaacggctcggtcaatgccgtctggatcggccgctacctgggcgaagcggcactcaccgcggcggccaacgccaacagcatcatgttcttcctgatcggttcggtgttcggcatcggcatggccgccaccatcctgatcggccaggcgatggggccgcggcgacgtggcccaggcgcgacgggtgatgggcaccagcgccaccttcttcatcggcatctcggtgctgatcgccgccggcggctggtggctggcgcggcacctgctggcggcgatgggcacgccggcggcgtcgctgccgctggc…	MQKPATLTEGPIGRQLLLFSLPILAGNIAQSLNGSVNAVWIGRYLGEAALTAAANANSIMFFLIGSVFGIGMAATILIGQAMGPRRRGPGATGDGHQRHLLHRHLGADRRRRLVAGAAPAGGDGHAGGVAAAGRRPTCG
gi|348022020|gb|AGHY01002367.1|	fig|487527.6.peg.334	peg	gi|348022020|gb|AGHY01002367.1|_988_560	988	560	-	hypothetical protein				ttgcgctggatggcggcggcggcgcgccagatcgaggccggcaactacgcggtggagcgccgcgacagcggccgccacgacgaggtcagcgaattgctgcgcgcgttcgggcgcatgagcgaggcgatcgcccggcacgaccgcgacggtacggcacatggcctataccgatgcgttgaccgggctgaccaaccggctcgcgttccgcgaggcgctggaccaccgcatgctgtcggcgcgcgcctcgcacacgccggctggcgctgctgttcgccgacatcgacgatttcaagcggatcaacgacaccctgggccacgaggccggcgacgaagcgctgctgcagttcgcgcggcgcatccagctggcggtggagcaactgggcggcgacgacgcgctgc…	MRWMAAAARQIEAGNYAVERRDSGRHDEVSELLRAFGRMSEAIARHDRDGTAHGLYRCVDRADQPARVPRGAGPPHAVGARLAHAGWRCCSPTSTISSGSTTPWATRPATKRCCSSRGASSWRWSNWAATTRCWRASAATSS
gi|348022022|gb|AGHY01002366.1|	fig|487527.6.peg.335	peg	gi|348022022|gb|AGHY01002366.1|_591_163	591	163	-	Malonate decarboxylase gamma subunit		FIG00002503	ff	gtgatcggcggcagcgccagcaccgcgctgggcgaggtcagcgtgatcggcagcgccgacaagctggaagtgggcgtggagcacgcgctggcgctggccgccgcggtgttggacagcacccggtcgcacccgcagcggccgatcgtgatgctggtcgataccgccggccagcggccggtcgcgcaaggacgaactgctcggcatcaacggctatttcggccatctggcgcaatgcctggacctggcgcggcggcgcggcgcgcggctgctgacgctggtctacggcgaatcggtcagcggcggcttcctcgccttcgggctgatggccgatgcgatctatgcgttgcccgaggcgcaggtgagggtgatggacctgcgcgcgatggcgcgggtcaccaa…	MIGGSASTALGEVSVIGSADKLEVGVEHALALAAAVLDSTRSHPQRPIVMLVDTAGQRPVAQGRTARHQRLFRPSGAMPGPGAAARRAAADAGLRRIGQRRLPRLRADGRCDLCVARGAGEGDGPARDGAGHQTATGRSCRR
gi|348022026|gb|AGHY01002364.1|	fig|487527.6.peg.336	peg	gi|348022026|gb|AGHY01002364.1|_35_538	35	538	+	hypothetical protein				gtgccctacgaagtccgcgacggcgcggagctgctggccggcacgctggtgtacgacttcggccacgttgtccacacccaatacctggcctgttcggaacagggccgccgcgccgatgcgctgagcctgctgctggccgagctgatcgagcaggctctacgcgcagcgcgacgtcctcagccctgggcatctccaccgagcagcagggccaggtgctcaacgccggcctggtcgagcagaaggaacggttcggggcgcgcgccgtggtgcacgatttctaccgctgggagttgcaatgagcctgccgccggccagcgtgccgttcctcgacctgcgcgccagcaacgcgcgctacgccgacgagctgaaggccgcggcggcgcgggtgatcgattccgg…	MPYEVRDGAELLAGTLVYDFGHVVHTQYLACSEQGRRADALSLLLAELIEQALRAARRPQPWASPPSSRARCSTPAWSSRRNGSGRAPWCTISTAGSCNEPAAGQRAVPRPARQQRALRRRAEGRGGAGDRFRLVRAGRGTGGLRARVRRLLRHRPRHRRRQRAWTR
gi|348022028|gb|AGHY01002363.1|	fig|487527.6.peg.337	peg	gi|348022028|gb|AGHY01002363.1|_651_43	651	43	-	Ubiquinone biosynthesis monooxygenase UbiB		FIG00000320	idu(2);Ubiquinone_Biosynthesis	gtgcattggcagtggacctgcgagacgctgaacgtgcaggacttcgtcgccggcatcggcggtcgcgacctggccggggtcgaagccgccggcctggaccggcgcccgctggcgcgcaccggtgccgacatcgtgctgaagatggtgctggaggacggctgtttccacgccgatccgcatccgggcaacatcttctacctgcccggcgagcgcatcgcggtgatcgacttcggcatggtcgggcgcatttccgagcagcgccgctaccaggtggtgcaactgctgcacgggctggtcacccaggacgccgaagcggtggccgacatcctgctggagtggaccgacggcgaggtcgaggtcgacgaggcgcgcctgcagttggagatcgccgcgttcgtc…	MHWQWTCETLNVQDFVAGIGGRDLAGVEAAGLDRRPLARTGADIVLKMVLEDGCFHADPHPGNIFYLPGERIAVIDFGMVGRISEQRRYQVVQLLHGLVTQDAEAVADILLEWTDGEVEVDEARLQLEIAAFVDQYPRRAAEGPAGGRHARRRHRVAAPARAGAAGRPGTDDQDLPAPGRGGAPARSGLRHGRRRPPRTWSG
gi|348022034|gb|AGHY01002360.1|	fig|487527.6.peg.338	peg	gi|348022034|gb|AGHY01002360.1|_829_299	829	299	-	Ribonucleotide reductase transcriptional regulator NrdR		FIG00000382	isu;Ribonucleotide_reduction	atgcactgccccttctgccagcacaccgatacccgggtgatcgattcgcgcgtgtccgaggacggcgcgacgatccgccgtcgtcgcgagtgcgaggcttgcggcgagcgtttcagcacgctggagacgatcgaactcaagctgccgacggtgatcaagagcgacggcggccgcgaggcgttcgatgcgcgcaagctgcgcaccagcttcgaccgcgcgctgcagaagcggccggtggccgaagagcagatcgaggcggcggtgcgtgcggtggtgcaccagctgcgcatgtccggcgagcgcgaactgccctcgatccgggtcggcgagtacgtgatggccgagctgcgcaagctcgaccacgtcggctacgtgcgcttcgcctcggtgtaccgcagc…	MHCPFCQHTDTRVIDSRVSEDGATIRRRRECEACGERFSTLETIELKLPTVIKSDGGREAFDARKLRTSFDRALQKRPVAEEQIEAAVRAVVHQLRMSGERELPSIRVGEYVMAELRKLDHVGYVRFASVYRSFQDVADFREEIEKLERELPVGSEQLPLLDLVRAAKPGDKTGKR
gi|348022036|gb|AGHY01002359.1|	fig|487527.6.peg.339	peg	gi|348022036|gb|AGHY01002359.1|_109_489	109	489	+	Aspartate 1-decarboxylase (EC 4.1.1.11)		FIG00008304	isu;Coenzyme_A_Biosynthesis	atgcaactgagcctgttgaagaccaagatccaccgcgccaccgtcacccattccgagttgaactacgaaggctcgatcgccatcgacgggctgctgctggacgcgaccggcatccgcgagttcgagcaggtgcacatctgggacgtgaccaacggcgcgcggttcagcacctatgcgatccgcgccgacgagggtagcggcatcatctcgctcaacggcggcgccgcgcgccacgtgcaggtcggcgacctgatcatcatcgccgcctttgccggcatgagcgaagaggaagccgcgcgcttccagccgaccctggtctacgtggacggcaacaacaagatcacccacaccaaccacagcatcccaaagcaggccgcatga	MQLSLLKTKIHRATVTHSELNYEGSIAIDGLLLDATGIREFEQVHIWDVTNGARFSTYAIRADEGSGIISLNGGAARHVQVGDLIIIAAFAGMSEEEAARFQPTLVYVDGNNKITHTNHSIPKQAA
gi|348022040|gb|AGHY01002357.1|	fig|487527.6.peg.340	peg	gi|348022040|gb|AGHY01002357.1|_535_182	535	182	-	FIG01210654: hypothetical protein		FIG01210652	ff	atgctcaccgcgaccgggcgcctgcgtggcctgctgcgcgatgccctgatcccgctctcgccggacatggcgcggctggccgaggtcgatgcggtcatggaactgactctcagcccgcgcgaacagaccttgctggcgacggtgcccaacctgctggaggcgcatttccagcgcctgcgcgcgactgcggcggcacccactcccgatccaacgctcaccgacgctctcccggcgccgtccggcgcggcctggctggacctgttccgccaggacctgcacagcgtcctgcgcgccgaactggacgtccgcttccatcccatcgaggcgctgctcgccgcgcttcgcagccgttga	MLTATGRLRGLLRDALIPLSPDMARLAEVDAVMELTLSPREQTLLATVPNLLEAHFQRLRATAAAPTPDPTLTDALPAPSGAAWLDLFRQDLHSVLRAELDVRFHPIEALLAALRSR
gi|348022046|gb|AGHY01002354.1|	fig|487527.6.peg.341	peg	gi|348022046|gb|AGHY01002354.1|_230_844	230	844	+	Conserved domain protein		FIG01210352	ff	gtggaagacgcggcgctgcgcctgggcttcaacaccttgcgcaccctggtgctggcctcctcggtgaccggcgccttccatgcgccggcgcatttcgacctgcgcgcgttctggctgcacagcttcgaagtggccggcgtgtgccggttgctggcgcggcagaagggcctggacgcggagaccgcgttcacctgcggcatgatgcacaacatcggcgaactgctgatccagaccggcgcgcccgactacgccgcgcaactgcacccggacgcctcgtccagcggccgcgccgccgacgagaccgtgcaactgggcttcggctacccggaagtgggcgccgagctggcgcggcgctggcacctgccgcaggtgatccagaccgccatcgccttccaggcg…	MEDAALRLGFNTLRTLVLASSVTGAFHAPAHFDLRAFWLHSFEVAGVCRLLARQKGLDAETAFTCGMMHNIGELLIQTGAPDYAAQLHPDASSSGRAADETVQLGFGYPEVGAELARRWHLPQVIQTAIAFQARPLQAPEGEPMPKVVAQAALVADALERHGGANEQARQAVTGPLMDDVDLDALFAALPDVIEADRAFTEMLK
gi|348022048|gb|AGHY01002353.1|	fig|487527.6.peg.342	peg	gi|348022048|gb|AGHY01002353.1|_138_440	138	440	+	FIG002649: ydiI hotdog fold superfamily			ff	atgccggtggacgcgcgcacgcggcagccgtacgggctgctgcacgggggtgcgtcggtggtgctggccgaaagcctgggcagcaccgccggcaacctgtgcgtggagccggggcgcatctgcgtgggcctggagatcaacgccaaccatctgcgcgccgcgcgcagtggcgtggtcaccggcaccgcgcggccgctgcacgtgggccgcagcacccaggtgtgggaaatccacatcgaggacgccgcgggcaagccggtgtgcgtgtcgcggttgaccctggcggtggtcgaccgcggctga	MPVDARTRQPYGLLHGGASVVLAESLGSTAGNLCVEPGRICVGLEINANHLRAARSGVVTGTARPLHVGRSTQVWEIHIEDAAGKPVCVSRLTLAVVDRG
gi|348022054|gb|AGHY01002350.1|	fig|487527.6.peg.343	peg	gi|348022054|gb|AGHY01002350.1|_236_36	236	36	-	FIG01212834: hypothetical protein		FIG01212832	ff	atgctggtgcggccgccgcgcggcttcccggccgacttcgagtgcatcgacgacctcaagcacaagaactgggtgttctggcgccaggtcgacgatgcggcgatgaccggcccgcggctgcgctcgcagatcgccgccgacctgcagacgctcggtccgttcgtggactatctgtgcgcggcgctggacctggaattctag	MLVRPPRGFPADFECIDDLKHKNWVFWRQVDDAAMTGPRLRSQIAADLQTLGPFVDYLCAALDLEF
gi|348022054|gb|AGHY01002350.1|	fig|487527.6.peg.344	peg	gi|348022054|gb|AGHY01002350.1|_1445_720	1445	720	-	Exodeoxyribonuclease I (EC 3.1.11.1)		FIG00001503	isu;DNA_Repair_Base_Excision	gtgctgccgctggcacggcatccacgcatcgacagccgggtgctggtgttcgacctggaaggcgacatcgagccgctgctgcgctatacgccggaacagatcgccgaccgcctgtacaccccgcaggccgacctgcccgagggcgaacagcgcatcccgctcaaggaagtgcatctgaacaaggcgccggcgctggtcgcctgggcgcacctgcgcggaggcggacttcgcccggctgcggctggacccggcgcagctgttggccaaggccgcgcgcctgcgcgaggccggcccgcgcgctggccgagaaggtgcggcgggtgttcgccaacgagcgtgccgcggtgccggccgatgtcgacgcctcgttgtacgacggcttcctggccggatggcgac…	MLPLARHPRIDSRVLVFDLEGDIEPLLRYTPEQIADRLYTPQADLPEGEQRIPLKEVHLNKAPALVAWAHLRGGGLRPAAAGPGAAVGQGRAPARGRPARWPRRCGGCSPTSVPRCRPMSTPRCTTASWPDGDKRAMAQVRASPPAQLAALEGQFRDPRLPELLFRYRARNWPQSLSIAEQARWDEYRRQRLQQDSGLSELSFDAFYAELADLRLAHSQDATKQALLDQLAAWAHDLQRSL
gi|348022062|gb|AGHY01002346.1|	fig|487527.6.peg.345	peg	gi|348022062|gb|AGHY01002346.1|_257_135	257	135	-	3-ketoacyl-(acyl-carrier-protein) reductase( EC:1.1.1.100 )				atggtccccgccgggcgcccgggcaagccggaggaagtggccgcgctggtcgccttcctgtgctcggacgcggccgcctacatcaacggccaggtcatcggcatcaacggcggcatgggctga	MVPAGRPGKPEEVAALVAFLCSDAAAYINGQVIGINGGMG
gi|348022070|gb|AGHY01002342.1|	fig|487527.6.peg.346	peg	gi|348022070|gb|AGHY01002342.1|_2998_194	2998	194	-	TonB-dependent receptor		FIG00004179	idu(60);Ton_and_Tol_transport_systems	gtgccgctgctcccgtgttcctggcgtgccgcgccgcaacccggtccactggctgcggccatctgcaccgcgctggccctgctcgcgccagcggtgcaggcgcaggatgcacagacgcaggacacccaggcgaccacgctggaacgggtcagcgtcaccggcagccatctgcgccgggtcgatgccgagaccgccagcccggtcatcaccatcgaccgccagcgcatcgaggacagcggccagaacacgctcggccagttgctgcagcagctgccggcgatggccggcaacatgcccaacgtggcgctcaattccggcttcagccacggccgtgcgctggtctcgctgcgcaatctcggccccgagcgcaccctggtgctggtcaacggccaccgcatg…	MPLLPCSWRAAPQPGPLAAAICTALALLAPAVQAQDAQTQDTQATTLERVSVTGSHLRRVDAETASPVITIDRQRIEDSGQNTLGQLLQQLPAMAGNMPNVALNSGFSHGRALVSLRNLGPERTLVLVNGHRMAGPASSVAAAPGVDVNAIPAAMVERIEVLTDGASSVYGSDAIAGVVNIILKDKYDGFAATADYGLSTHGDGNRRSLGLEWGKTWDRGGLILGVSRSSMNALYDSDRDYARTAQSYLNGDVVERRGNGTRAFLGNGSVLTPNANLAPGQVTAGDFHTYSQAVEGYDAYTGQYLITPVQRTNASAHASFDFTPNVQGYLDMFWTRSETTSQLTAYGLELPNAAQNYYNPFGAQLSRYLLRSVPANTRVYTSTMYQTNIVAGLRGKFGD…
gi|348022072|gb|AGHY01002341.1|	fig|487527.6.peg.347	peg	gi|348022072|gb|AGHY01002341.1|_497_285	497	285	-	TonB-dependent receptor		FIG00004179	idu(60);Ton_and_Tol_transport_systems	gtggagcgcagcaacaccctgggccgctatggtggctatgcgctggccaatctcggcgcgacctggcgctggcgcgcgcagcgcgaggtctcgctgcaactgaagaacctggccgatcggcactacgtctacgcctggtacgacagcgggtcctccggctactcgcccggcgatggccgcgcgctgtacgccacgctgagctggggctggtga	MERSNTLGRYGGYALANLGATWRWRAQREVSLQLKNLADRHYVYAWYDSGSSGYSPGDGRALYATLSWGW
gi|348022078|gb|AGHY01002338.1|	fig|487527.6.peg.348	peg	gi|348022078|gb|AGHY01002338.1|_119_268	119	268	+	Ribosomal RNA small subunit methyltransferase B (EC 2.1.1.-)		FIG00138175	isu;RNA_methylation	gtgcaggccttgctggcgcggcagcaaggcgcggcgctggaggatccgggcgcggcctgcgggcatgcctccggtggcgggcgccagcgcttccccggcgaacaggattgcgacggcttctactacgcacggttccgcaagacggcgtga	MQALLARQQGAALEDPGAACGHASGGGRQRFPGEQDCDGFYYARFRKTA
gi|348022084|gb|AGHY01002335.1|	fig|487527.6.peg.349	peg	gi|348022084|gb|AGHY01002335.1|_2_529	2	529	+	ATP-dependent helicase HrpB		FIG01045463	ff	gtggtcaccgagggcatcctgacccgcatgctgcaggacgacccgatgcttgagggcgtcggcgcgctgctgttcgacgaattccacgagcgccacctggccgcggacctgggcctggcgctggccctggacgtgcaggcgcaggtacgcgaggacctgcggcatcgtggtgatgtcggccacgctggacggcgagcgcctggcgcagttcctcgacgcgccgcggctgtccagcgccgggcgcagtttcccggtggagatcgcgcacttcccggcgcgacgcgaggaatccctggaagcgcaggcccggcgcgcggtggagcatgcgctgcagcagcatccgggcgacgtgctggtgttcctgcccggcgagcgcgagatccgggatgcgcaccatgc…	MVTEGILTRMLQDDPMLEGVGALLFDEFHERHLAADLGLALALDVQAQVREDLRHRGDVGHAGRRAPGAVPRRAAAVQRRAQFPGGDRALPGATRGIPGSAGPARGGACAAAASGRRAGVPARRARDPGCAPCAGTAQVPRDRGAAALRAALQRRPGPGIQSRPAAAPGAGHQRR
gi|348022090|gb|AGHY01002332.1|	fig|487527.6.peg.350	peg	gi|348022090|gb|AGHY01002332.1|_598_197	598	197	-	ABC-type anion transport system, duplicated permease component			ff	atgatcctcggcacccagtggtacatcctgttcaacgtgatcgccggcgccagcgcgttccccaccgacctgcgcgaggccgccaccatctaccacctgcgctcgtggacctggtggcggcgggtgatcctgcccggcatcttcccgtactacatcaccggcgcgctgaccgcgtcgggcggttcctggaacgccagcatcgtcgccgaactggccagctggggccacacccaggtgcaggcctacggcctcggcgcctacatcgcccgtgccacggccgccggcgatggcccgcgggtgttgctcggggtggcggtgatgtcgctgttcgtgaccctcttcaaccgcgcggtctggcgacgcctgtacgtcttcgccgaacgccgcctgcgtttcgac…	MILGTQWYILFNVIAGASAFPTDLREAATIYHLRSWTWWRRVILPGIFPYYITGALTASGGSWNASIVAELASWGHTQVQAYGLGAYIARATAAGDGPRVLLGVAVMSLFVTLFNRAVWRRLYVFAERRLRFD
gi|348022096|gb|AGHY01002329.1|	fig|487527.6.peg.351	peg	gi|348022096|gb|AGHY01002329.1|_596_48	596	48	-	DNA-binding response regulator KdpE				gtgctggacatcggcctgcccgaccaggacggacacagcgtgctgcgcgaactgcggcaatggtcgtcggtgccggtgatcatgctgaccgtgcgcgccggcgaggccgagaaggtgcaggcgctggacgccggcgccaacgactacgtgaccaagcccttcggcgtgcaggaattgatggcgcgcatccgcgtgctgctgcgcatgcagccggtggccggcgaggccgagccggtgttcgacgacggccacctgcacatccacctgggcctgcgcgaggtgcgcctggacggcgaggcactgccgctcagccgcaaggagtacgcgctgctcgccctgctgctgcgccacagcggccgcgtggtgacgcagccgcaactgctgcgcgaactgtggggg…	MLDIGLPDQDGHSVLRELRQWSSVPVIMLTVRAGEAEKVQALDAGANDYVTKPFGVQELMARIRVLLRMQPVAGEAEPVFDDGHLHIHLGLREVRLDGEALPLSRKEYALLALLLRHSGRVVTQPQLLRELWGPTHQDDTHYLRILVGKLRQKLGDSAVAPRYIATEPGVGLRFIGAQCPSA
gi|348022098|gb|AGHY01002328.1|	fig|487527.6.peg.352	peg	gi|348022098|gb|AGHY01002328.1|_5_1249	5	1249	+	Predicted sucrose-specific TonB-dependent receptor		FIG00137261	idu(1);Sucrose_utilization	gtgcatctcaacgacctgggcaacgtggtcaacgacctcagcctggcgcgcgacttcggcagcggcgacggcggcaacctcaacctcaaggccggctggtacacctcgcggcagaccatcgacgtggactggacctggaattcctacgtgcagtcgctggcgcaccggccgcggctgctggacgtggtcgccgccgacggcagcctgcgctcgcaggacggactgtacgcctacggtgtgccgtactggggcctggacgtcacccgtcattacgacgtgcgctacgacatcaacgcaccgtacctggcgctgagctgggaccagggtccgctgagcctggacggcagcctgcgctacgacgtgggccgcgcgcgcggcaacaccgccggcggcctgctg…	MHLNDLGNVVNDLSLARDFGSGDGGNLNLKAGWYTSRQTIDVDWTWNSYVQSLAHRPRLLDVVAADGSLRSQDGLYAYGVPYWGLDVTRHYDVRYDINAPYLALSWDQGPLSLDGSLRYDVGRARGNTAGGLLASNVDVNGDGVIEAPEQSVATIDYGNRKPVRYDWNYLSYSFGGNYMLNDDLAAFARYSRGARANADRLLFGVVRDDGSVSSNEAVNVVKQLEGGLKWRSGGLSLFATAFAARTQEQNYEATTQRFFDRTYKAHGLELEAAYRAGGFNLNGGLTWTDATIDKDQITPANAGNTPRRQARFVWQLTPSYRGERYQVGVNAIGTSPAYTQDSNQLKMPGYTQVNLFGDYRITDALTVSLNVNNLFNTFGLTEAEEASIADASSGVIRAR…
gi|348022102|gb|AGHY01002326.1|	fig|487527.6.peg.353	peg	gi|348022102|gb|AGHY01002326.1|_217_14	217	14	-	Para-aminobenzoate synthase, aminase component (EC 2.6.1.85)		FIG00341164	isu;Chorismate:_Intermediate_for_synthesis_of_Tryptophan,_PAPA_antibiotics,_PABA,_3-hydroxyanthranilate_and_more.	gtggcgcctacaccggcgcgttcggctgggctcaaccgcgacggcgacatggacctgaacatcctgattcgtaccgccgaggtggacggcgcgcgcgtgcatttccgtaccggcgccggcatcgtgttcgattcggacccggcgcgcgaactcgacgagacccgggccaaggcgcgcggcctgctgcgcgcgctggagccgtga	MAPTPARSAGLNRDGDMDLNILIRTAEVDGARVHFRTGAGIVFDSDPARELDETRAKARGLLRALEP
gi|348022108|gb|AGHY01002323.1|	fig|487527.6.peg.354	peg	gi|348022108|gb|AGHY01002323.1|_149_6	149	6	-	hypothetical protein				atgcgatgcgctgcaggacggccgcggctgcagggacatccgcggcattgctgcggcgacgtgtttgcagggctgctgtgcgagggtttcggtgccgacagcaacgagggccggcgacgtgccgactccgttcgtcgcggctga	MRCAAGRPRLQGHPRHCCGDVFAGLLCEGFGADSNEGRRRADSVRRG
gi|348022108|gb|AGHY01002323.1|	fig|487527.6.peg.355	peg	gi|348022108|gb|AGHY01002323.1|_1287_223	1287	223	-	Nucleoside-diphosphate-sugar epimerases		FIG00002924	isu;COG0451 isu;CBSS-296591.1.peg.2330	atgcgcaagggcatcgcactgatcgtcggagtcaccggcatctccggctacaacctcgccaacgtgctggtcgccgacggctgggcggtctacgggctggcacgccgcccggtgccgcaggaaggcgtgatcccggtagcggccgatctgctcgaccgcgaggccaccgtggccgcactgcgtgggctgccgatcacccacgtgttcttctgcacctggacccgacgcgacaccgagaaagaaaacgtcgccgccaacggcgcgatgctgcggcatctgtgcgaaggcctggacggtgcagcgctgcagcacatggcgctggtcaccggcaccaagcattacctcggctcgttcgagcactacggcagcggcaaggcggagacgccgttccgcgagagc…	MRKGIALIVGVTGISGYNLANVLVADGWAVYGLARRPVPQEGVIPVAADLLDREATVAALRGLPITHVFFCTWTRRDTEKENVAANGAMLRHLCEGLDGAALQHMALVTGTKHYLGSFEHYGSGKAETPFRESEPRQPGENFYYTLEDLLFDAAARHGFGWSVHRSHTMIGQANGSNAMNMGVTLAVYATLCKHTGQPFVFPGSRAQWDSLTDLTDAGLLGRQLAWAATNPAARNQAFNTVNGDVFRWRWMWGEIAAFFGLPPAPYPEAPMPLQARLQDTAPALWREIAERHGLVQADVNQLASWWHTDADLGREIECVNDMTKSRDLGFLGYYDSRASFLELFTRLRAQRVIP
gi|348022114|gb|AGHY01002320.1|	fig|487527.6.peg.356	peg	gi|348022114|gb|AGHY01002320.1|_1047_130	1047	130	-	RarD protein, chloamphenicol sensitive		FIG01211022	ff	atgaccacggcctccgcgcaggacgcgcggcgcgggctgtggatcaccgcggcgaccttcgccctgtggggcgtggtgccggtgtactggcacctgctgcaggcggtgccgtcgccgcacatcatcgcccaccggatcgtgtggagcacgctgttggtggtgccttggctggtgtacagcgcgcgcctgcagtggtggcggcgcatcgccgcgcagccgcgcgcgctggccacgctggcgctgagcagcctggcgatcgccttcaactgggggctgtacatctgggcggtcaatgccggccacgtgatcgagaccagcctgggctacttcatcaatccgctggtcaacgtgctgctcggggtgctggtgctgcacgagcggctgcgcccgttgcagtgg…	MTTASAQDARRGLWITAATFALWGVVPVYWHLLQAVPSPHIIAHRIVWSTLLVVPWLVYSARLQWWRRIAAQPRALATLALSSLAIAFNWGLYIWAVNAGHVIETSLGYFINPLVNVLLGVLVLHERLRPLQWLAVACAALGVAWLTVDAGTLPWIALGLAGSFGLYGLLRKLVQVDAVAGLGVESLYLFLPALGFVLWGEAGHGGGFTGGWGWRNDLLLVFGGVVTAVPLIGFAYGVRRIPLSLVGLLQYIAPSLQLLLGVWFFREPFDAGKAIGFAAIWVGLLLFAGESLWRSGVWRRAGIKD
gi|348022114|gb|AGHY01002320.1|	fig|487527.6.peg.357	peg	gi|348022114|gb|AGHY01002320.1|_1274_1044	1274	1044	-	Permease of the drug/metabolite transporter (DMT) superfamily		FIG00002576	idu(2);Queuosine-Archaeosine_Biosynthesis	gtggcctacctgtgcgtgttcggctcgatcgtcgccttcaccgcctacgtgtggctgctgcagaacgtgcgcccggccctggccggcagctatgcctacgtcaatccggtgatcgcggtggcgctgggcagctggctcggccaggagcgcttcagcgccagcgacgtcggcgcgatggcggtgatcctggccggggtggtggtgatcaccgtggcgaggacccggcgatga	MAYLCVFGSIVAFTAYVWLLQNVRPALAGSYAYVNPVIAVALGSWLGQERFSASDVGAMAVILAGVVVITVARTRR
gi|348022116|gb|AGHY01002319.1|	fig|487527.6.peg.358	peg	gi|348022116|gb|AGHY01002319.1|_1076_69	1076	69	-	Glycerophosphoryl diester phosphodiesterase (EC 3.1.4.46)		FIG00002239	idu(1);Glycerol_and_Glycerol-3-phosphate_Uptake_and_Utilization idu(1);CBSS-176299.4.peg.1996A	gtgatcggccaccgcggcgccagtgcgctgcgccccgagcacaccctggcctcctacgccaaggccatcgccgacggtgccgacttcatcgagccggacctggtctcgaccaaggatggcgtactggtggcgcgccacgagaacgagatcggcggcaccaccgacgtggccgcgcacccggagttcgccgcgcgcaagaccgtcaagcagatcgacgggcagcgcgtggaaggctggttcaccgaagacttcaccctggccgagctgaagaccctgcgcgcgcgcgaacgcctgccgcaactgcgcggcactgccttcgacgggcagttccaggtgccgaccctggacgagatcatcgacttcaccgcggccgagtcggccacgcgcgggcgcccgatc…	MIGHRGASALRPEHTLASYAKAIADGADFIEPDLVSTKDGVLVARHENEIGGTTDVAAHPEFAARKTVKQIDGQRVEGWFTEDFTLAELKTLRARERLPQLRGTAFDGQFQVPTLDEIIDFTAAESATRGRPIGLIPEIKHGTYFRGLGLAMEDKLVASLDAHAYTRKAPVVIQSFEIGKLEYLHGKLGATHPNVRLVQLLGDPKERPGDQLRDGPTYAQMGSAQGLRAIAKYAQLVSPNLRAIVPVSADGALAAPTSFVADAHAAGLQVIPYTFRPENYFLPKQLQDARGPAAVNAAGSMKEMRALLDAGIDGFFTDDPAVGRAAVDGTPPPVR
gi|348022118|gb|AGHY01002318.1|	fig|487527.6.peg.359	peg	gi|348022118|gb|AGHY01002318.1|_241_20	241	20	-	conserved hypothetical protein				atgcagaccatcgatctccagctagaaagcgactacgtggaactcaagcacctgttgaaactgaccggcctgtgcgacagcggcggcgcggccaaggccgtgatcagcgaaggccaggtgcgcgtggacggcgaggtcgagctgcgcaaggcctgcaaggtgcgcgcgggccaggtggtgcagttgggcgacgtgcaggtgcaggtgctcggcaaggcatga	MQTIDLQLESDYVELKHLLKLTGLCDSGGAAKAVISEGQVRVDGEVELRKACKVRAGQVVQLGDVQVQVLGKA
gi|348022120|gb|AGHY01002317.1|	fig|487527.6.peg.360	peg	gi|348022120|gb|AGHY01002317.1|_646_185	646	185	-	Malate synthase (EC 2.3.3.9)		FIG00001217	idu(1);Glyoxylate_bypass idu(1);Glyoxylate_bypass_cluster	gtgctgatcgtgcgcccgcgcggctggcacctggacgagaagcacgtgctggtcgacgggcagccgctggccggcggcctgttcgacgcggcgctgttcgccttccacaacggccgcgcgctgcaggccaaggaccgcggcccgtacctgtacctgcccaagctgcagtcgatggaggaggcggcgctgtgggaaaccgcgctggcccacatcgaggacatgctcggcctgccgcagggccagatcaaggtcaccgtgctgatcgagacgctgccggcggtgttcgagatggacgagatcctgcacgcgctgcgcgggcgcatcgtcggcctgaactgcggccgctgggactacatcttttcctacctgaagaccttccgccggcatccggaccgggtg…	MLIVRPRGWHLDEKHVLVDGQPLAGGLFDAALFAFHNGRALQAKDRGPYLYLPKLQSMEEAALWETALAHIEDMLGLPQGQIKVTVLIETLPAVFEMDEILHALRGRIVGLNCGRWDYIFSYLKTFRRHPDRVLPERGQVTMTQPFLKATRNC
gi|348022122|gb|AGHY01002316.1|	fig|487527.6.peg.361	peg	gi|348022122|gb|AGHY01002316.1|_497_718	497	718	+	truncated cellulase S				gtgtacaccttcattccgcacaacaccgccggccagccgaccctgccgagcaacggcaatctcaacatcgacatcaagccattcctgacctggctgcacaatcaccgcgcgcaggacggacgcttcagcaacgcgatgtacctgcacgtggtcgaggcgggcttcgaggtggtgcgcggcaacggctgggcctggatccaggccaacatcggcgccaactga	MYTFIPHNTAGQPTLPSNGNLNIDIKPFLTWLHNHRAQDGRFSNAMYLHVVEAGFEVVRGNGWAWIQANIGAN
gi|348022124|gb|AGHY01002315.1|	fig|487527.6.peg.362	peg	gi|348022124|gb|AGHY01002315.1|_45_419	45	419	+	Beta-propeller domains of methanol dehydrogenase type				gtggacaccaccggcacgctgacgccgaaccagcgcctggagctggaccggcaggcggggcagctgcagcagcgcaagggcagccagttgcaggtgctggtggtgcccagcaccgccccggaaagcatcgagcaatacacccagcgcgtgttcgaccagtggaagctcggccgcaagggcgtggacgacggcgtactgctggtggtggccaaggacgaccggcgcgtggcgcatccagcccggctacggcctgggagggcgcgattcccgacgccaccgccaaccgcatcatccaggagtacctggtgccgcgcttccgcgccggcgactacagcggcgggattgccgaagcgaccgcgatgctggtcaagctga	MDTTGTLTPNQRLELDRQAGQLQQRKGSQLQVLVVPSTAPESIEQYTQRVFDQWKLGRKGVDDGVLLVVAKDDRRVAHPARLRPGRARFPTPPPTASSRSTWCRASAPATTAAGLPKRPRCWSS
gi|348022126|gb|AGHY01002314.1|	fig|487527.6.peg.363	peg	gi|348022126|gb|AGHY01002314.1|_102_437	102	437	+	Two-component system regulatory protein		FIG01209847	ff	gtgggcgacctgcaactggacctgtccacgctggaggtgacccgcggcgggcgcaccctgcacctttacccggcttgccgcaagctgctggaggtgctgatgcaggccagcccggccgcggtcacccgcgaccgcctggagcaggcgctgtggggcgacgagccgccggacggcgacatgctgcgctcgcacatctacgacctgcgccgcagcgtcgacggcccgttcgcggccaagctgatccacacccctgccgcgcatcggctaccgcctggcggtggtcggcccccacgagggcgagcatgccgactagggccgggctgcggcagcggctga	MGDLQLDLSTLEVTRGGRTLHLYPACRKLLEVLMQASPAAVTRDRLEQALWGDEPPDGDMLRSHIYDLRRSVDGPFAAKLIHTPAAHRLPPGGGRPPRGRACRLGPGCGSG
gi|348022128|gb|AGHY01002313.1|	fig|487527.6.peg.364	peg	gi|348022128|gb|AGHY01002313.1|_715_38	715	38	-	Chorismate synthase (EC 4.2.3.5)		FIG00000212	isu;Common_Pathway_For_Synthesis_of_Aromatic_Compounds_(DAHP_synthase_to_chorismate)	atgcgcgtggccgccggcgtcatcgccaagaagtggctggcgcagcgctacggcgtgcgcgtgcgcggctacctgtcccagctcgggccgctgctgccgcagggtttcgcctgggacgcggtggaagacaacgcgttcttctggccgcatgcgccgcaggtgccggagctggaggcgtacatggatgcgctgcgcaagtccggcgattcgatcggcgcgcgcgtgaccgtggtcgccgacgggcgtgcccgcgggctggggcgagccgatctacggcaagctcgacggcgagttggccgcggcgatgatgagcatcaatgcggtcaagggcgtggagatcggcgacggcttcgccgcggtgacccagaagggcaccgaccatcgcgacctgatcgcgcc…	MRVAAGVIAKKWLAQRYGVRVRGYLSQLGPLLPQGFAWDAVEDNAFFWPHAPQVPELEAYMDALRKSGDSIGARVTVVADGRARGLGRADLRQARRRVGRGDDEHQCGQGRGDRRRLRRGDPEGHRPSRPDRAGRVPVQPRRRRARRHRHRPAGRRLGCVQAHLQPAPARRHGGRGRAGGGRDHHRPPRSLRRHPRHPDRRGDDGAGADGPGAAPPARNAATSAR
gi|348022134|gb|AGHY01002310.1|	fig|487527.6.peg.365	peg	gi|348022134|gb|AGHY01002310.1|_416_177	416	177	-	hypothetical protein				atggccgccctgaactacaaccacctgcgctacttctgggccgtggcccacgacggcaatctgacccgcaccgccgaacggctccaccctcacccaatcggccctgtcggtgcagatccgcaagctcgaggagcgcctcggccatgcgctgttcgagcggcgcgggcggcaactgcacctgaccgaggccgggcagatcgtgctcgaccatgccgacgcgatcttcgccaccggcgatga	MAALNYNHLRYFWAVAHDGNLTRTAERLHPHPIGPVGADPQARGAPRPCAVRAARAATAPDRGRADRARPCRRDLRHRR
gi|348022138|gb|AGHY01002308.1|	fig|487527.6.peg.366	peg	gi|348022138|gb|AGHY01002308.1|_256_110	256	110	-	Protein of unknown function UPF0060			ff	atgaagacgctgctgctgttcgtgctgaccgccgtcgcggaaatcgtcggctgctaccttcctttatctctggctgcgcgaacagcgcagcgcctggctgctggtgccggctgcaggccagcctggcggccttcgtctggctgctga	MKTLLLFVLTAVAEIVGCYLPLSLAARTAQRLAAGAGCRPAWRPSSGC
gi|348022138|gb|AGHY01002308.1|	fig|487527.6.peg.367	peg	gi|348022138|gb|AGHY01002308.1|_549_253	549	253	-	Nucleoside triphosphate pyrophosphohydrolase MazG		FIG00002974	isu;Nucleoside_triphosphate_pyrophosphohydrolase_MazG	gtgcaggaagaactggaagaagtgcgcgcggagctggcgcatggcgccgcggccgatccggcacggctgcaggacgagatcggcgacctgctgttcgtctgcgccaacctggcgcggcatgccaaggtcgacgtcggcgccgcgctgcgccatgccaacctcaagttcgaacgtcgcttccgcgcgatggagcgcttggcgcaacaggacggcggcgcgctgcacggcctggccctagcccagcaggaggcgtactggcagcgcgccaaggacgaagagcgcgccgcggccggatga	MQEELEEVRAELAHGAAADPARLQDEIGDLLFVCANLARHAKVDVGAALRHANLKFERRFRAMERLAQQDGGALHGLALAQQEAYWQRAKDEERAAAG
gi|348022142|gb|AGHY01002306.1|	fig|487527.6.peg.368	peg	gi|348022142|gb|AGHY01002306.1|_332_111	332	111	-	FIG01212791: hypothetical protein		FIG01212787	ff	gtggagctggacgtggtggagatgccggacgaggcaccgcgcctgctgctgcaggtgttgccgcgacggccacggcggccgggccaccgcctgcaggtgctgttccgcggcacccacatcccggtcggcgaagtgctgttcgacgggcaactgctgaagctgtggcacctgtccgaaccggccgcgccgcaggaccccgcccaggagaccgcacatgcgtag	MELDVVEMPDEAPRLLLQVLPRRPRRPGHRLQVLFRGTHIPVGEVLFDGQLLKLWHLSEPAAPQDPAQETAHA
gi|348022146|gb|AGHY01002304.1|	fig|487527.6.peg.369	peg	gi|348022146|gb|AGHY01002304.1|_21_236	21	236	+	Flagellar basal-body rod protein FlgF		FIG00000767	ff	atgcgcaacgtcagcgacgatccggccaaggccttcgcgccggcgaccggcaattcgctgcgcaccggcgtgctcgagggcagcaacgtcgatgccgccggcgcgctggtgcagatgatccagttgcagcgccagttcgaaatgcaggtgaaggtcatcaagaacggcgacgagaacgcgcagtcggccaacaccctgctgcgtctgaacggctaa	MRNVSDDPAKAFAPATGNSLRTGVLEGSNVDAAGALVQMIQLQRQFEMQVKVIKNGDENAQSANTLLRLNG
gi|348022152|gb|AGHY01002301.1|	fig|487527.6.peg.370	peg	gi|348022152|gb|AGHY01002301.1|_273_88	273	88	-	Choline dehydrogenase (EC 1.1.99.1)		FIG00057416	ff	atgggcagcgacgcgcaggcggtggtcgacccgcagctgcgcctgcgtggcctcgacggcctgcgcgtggtcgatgcctcggtgatgccgcgcctggtcagcggcaataccaacggcccgacgatgatgatcgccgagcgcgctgccgacctgatccgcgggcgcatggtcctgcgggaggggtga	MGSDAQAVVDPQLRLRGLDGLRVVDASVMPRLVSGNTNGPTMMIAERAADLIRGRMVLREG
gi|348022154|gb|AGHY01002300.1|	fig|487527.6.peg.371	peg	gi|348022154|gb|AGHY01002300.1|_203_51	203	51	-	Predicted Zn-dependent peptidases				atgctcgacccgaacagcctgacctgggtggtggtgggcgacctgaagcagatcgaggcgccggtgcgcgcgctgaagctgggcgaggtcacggtgatcgatgccgacggggtgccgcagggcggtgcggcggcggccccggcgccgcgctga	MLDPNSLTWVVVGDLKQIEAPVRALKLGEVTVIDADGVPQGGAAAAPAPR
gi|348022156|gb|AGHY01002299.1|	fig|487527.6.peg.372	peg	gi|348022156|gb|AGHY01002299.1|_137_1240	137	1240	+	Phosphoserine aminotransferase (EC 2.6.1.52)		FIG00000445	isu;Glycine_and_Serine_Utilization isu;Serine_Biosynthesis isu;Pyridoxin_(Vitamin_B6)_Biosynthesis	atgacgcgcgcgttcaatttcagtgccggccccgctgccttgccggaatcggtcctgcgccaggcgcaggcggagatgttggagtggaacggcgtgggcgcctcgatcgtggagctgagccaccgcggcgccgagttcatggaggtggcggcacaggccgacgccgacctgcgccggctgatcggcattcccgacgactacgcggtgctgttcctggccggtggcgccactacccagcaggcgctgctggcgctgaacttcgccgcgcccgggcagaccgtggactacgtggtgaccgggcactggggcaagaccgcgatcaagcaggtcgggccctacgtcgacgtgcacgtggccgccagcagcgaggccggcggcttccgcgacatcccgccgcgc…	MTRAFNFSAGPAALPESVLRQAQAEMLEWNGVGASIVELSHRGAEFMEVAAQADADLRRLIGIPDDYAVLFLAGGATTQQALLALNFAAPGQTVDYVVTGHWGKTAIKQVGPYVDVHVAASSEAGGFRDIPPRADWQLREDAAYVHITANETIHGVEFRDTPDVGTVPLFADFSSSIASEPIDVSKYALIYAGAQKNLGPVGVTVVIIRRDLLERAGQPRADIFDYPLARGARLHAQHPADLELVPGRAGVQVDAGRGRGGGVRRAQSGQVGAGVRGDRRLRRLLPQRGRRVGALADEHSVLPAGRDADHAFRRRIQGGRPAGAEGPQGGRRHPRVAVQRHAPGRRAGTGRVHARLPAAPRLSRRFL
gi|348022158|gb|AGHY01002298.1|	fig|487527.6.peg.373	peg	gi|348022158|gb|AGHY01002298.1|_95_253	95	253	+	Cell division protein FtsN		FIG00015744	isu;Bacterial_Cytoskeleton	atgctgggcctgtcggcgcgcgtggaatcggcgcagatcagcggcaagaccgtctaccgcgtgcgcatggggccctacggcaccgccagcgaactggccgaggccaagcagaagttgaacggcagcgggctatcggcgatcgcgatcaaggcgcagtga	MLGLSARVESAQISGKTVYRVRMGPYGTASELAEAKQKLNGSGLSAIAIKAQ
gi|348022162|gb|AGHY01002296.1|	fig|487527.6.peg.374	peg	gi|348022162|gb|AGHY01002296.1|_217_68	217	68	-	hypothetical protein				gtgctgccgatgggcagcgacgtggcgcgcgtctcgctgacggcggcgccactggtgccgggccgcgtggtctatcggacgtcggaagtcgtggtgcggctgcgcagccatgccagcggcgacgcatgggagatcacgccggcagagtga	MLPMGSDVARVSLTAAPLVPGRVVYRTSEVVVRLRSHASGDAWEITPAE
gi|348022164|gb|AGHY01002295.1|	fig|487527.6.peg.375	peg	gi|348022164|gb|AGHY01002295.1|_88_606	88	606	+	FIG01209938: hypothetical protein		FIG01209934	ff	gtggggccgttcctgctcagcggcccggccgacaccgtgcaggcggtggccgaggccctggaggaggtgctgctggcgcagggcatggcccaggccgataccgcgttgctggcgcagcagggcttcggcgcgcagatcgagcacgcccgctatctgaccggcaacgacctggcggcgatgatgtcgatgcagtacgacaaccagggcctggcgccgctgtggccgctgatcgagaccgcgctgctggcaccggaccaggaagagtggctgcaggccccgccggagccgttgctgcgctaccgcggcggcgaagtgcgcatggccctgttcgacccggccagctggtgcgcgcactacgcctacgaacgccaggactgcgagcgcctgcagcgggtctac…	MGPFLLSGPADTVQAVAEALEEVLLAQGMAQADTALLAQQGFGAQIEHARYLTGNDLAAMMSMQYDNQGLAPLWPLIETALLAPDQEEWLQAPPEPLLRYRGGEVRMALFDPASWCAHYAYERQDCERLQRVYEQYLARQRQLAAVLEAHGLPVLYVHCESGQDAKQALLAA
gi|348022170|gb|AGHY01002292.1|	fig|487527.6.peg.376	peg	gi|348022170|gb|AGHY01002292.1|_256_489	256	489	+	FIG01212439: hypothetical protein		FIG01212438	ff	atggccgagacgcccatgaacgactcgctgaagaccttgctgatcgtcgcgttcctgctgctcatcctgtggaacctgggcgccggcctgtattacctgttggtggaccgcggccagagcaagcgcacggtgaacgcattgacctggcgcatcggcctatcggtgtgcctgatcctgctggtgatcctgggcatctataccggcacgatcaagccccatggactcgggcggtag	MAETPMNDSLKTLLIVAFLLLILWNLGAGLYYLLVDRGQSKRTVNALTWRIGLSVCLILLVILGIYTGTIKPHGLGR
gi|348022176|gb|AGHY01002289.1|	fig|487527.6.peg.377	peg	gi|348022176|gb|AGHY01002289.1|_406_792	406	792	+	4-diphosphocytidyl-2-C-methyl-D-erythritol kinase (EC 2.7.1.148)		FIG00000377	ff	gtggccggcgtcgccgaggccgacgacctgctggtgcgtgccgcgcgattgctgcaaaaagcggcgaatgtcgcacacggtgtggatatccgcgtcgaaaagcgcattcctgcgggcggtggcttcggtggcggctcgtccgatgcggccaccgcgctggtggcgctgaatgcgttgtggggcgccgggctggacgaggatgccctggccggcctcggcctgtcgctgggcgcggacgtgccggtgttcgtgcgcgggcgcgatgcctgggccgaagggtgtgggcgagcgactgaccccgcttcgggttgccgccggcctggtatgtgctggccgatccgggcgtgcacgtgcccaccgcggcgctgttccagtccccggatttga	MAGVAEADDLLVRAARLLQKAANVAHGVDIRVEKRIPAGGGFGGGSSDAATALVALNALWGAGLDEDALAGLGLSLGADVPVFVRGRDAWAEGCGRATDPASGCRRPGMCWPIRACTCPPRRCSSPRI
gi|348022182|gb|AGHY01002286.1|	fig|487527.6.peg.378	peg	gi|348022182|gb|AGHY01002286.1|_230_30	230	30	-	FIG01211085: hypothetical protein		FIG01211083	ff	gtgccggccgacatcctgatggccgaggacgacccggtgatcccgctggacgacttccgcaactggcgcctgcccgaggtggcccggctggagatcgcgcactggggcggccattgcggcttcatcgagaatgcgcgcggcgatggcttcgccgaacgctgggtggccgaacggctgaccgaggggctggtggaagcctag	MPADILMAEDDPVIPLDDFRNWRLPEVARLEIAHWGGHCGFIENARGDGFAERWVAERLTEGLVEA
gi|348022184|gb|AGHY01002285.1|	fig|487527.6.peg.379	peg	gi|348022184|gb|AGHY01002285.1|_337_83	337	83	-	Formiminoglutamic iminohydrolase (EC 3.5.3.13)		FIG00016334	isu;Experimental_-_Histidine_Degradation	gtgcctggtccacgccacccatgtcgacggccgccgaagtgcagggcatcgccgccagcggcgcccgtggtcgggctgtgcccgatcaccgaggccaacctcggcgacggcctgttcccgatgcccgcgttcgtgcgcgccggcggccggttcggcgtggggtcggactccaacgtgctgatcgatgcggccgaggaactgcgccctgctcgaatatggtcagcgcctgagcctgcgcgggcgcaaacgtgctga	MPGPRHPCRRPPKCRASPPAAPVVGLCPITEANLGDGLFPMPAFVRAGGRFGVGSDSNVLIDAAEELRPARIWSAPEPARAQTC
gi|348022188|gb|AGHY01002283.1|	fig|487527.6.peg.380	peg	gi|348022188|gb|AGHY01002283.1|_1012_311	1012	311	-	Osmosensitive K+ channel histidine kinase KdpD (EC 2.7.3.-)		FIG00000846	isu;Potassium_homeostasis	gtgcagcgcccgggcctggagcagcagcgcctggccgaagcgatggtcgaggacatcggccaggccgcactgcgcacgcgcctggtcgccgacctggagagcgcgcgagtcagcggcgagaccgagcggctgcgctcggcactgctgtcctcggtctcgcacgacctgcgctcgccgctggcggcgatgatcggcgcggccagcagcctgtccagctacggccaggcgatggacgcggacgatcgccgcagcctgctcgacaccatccaactggaaggcgagcgcctggaccgctatatccagaacctgctggacatgacccggctcggccacaccgggctgaccttgaaccgcgactggatcggcgtggacgaactgatcggctcggccggcgcggcg…	MQRPGLEQQRLAEAMVEDIGQAALRTRLVADLESARVSGETERLRSALLSSVSHDLRSPLAAMIGAASSLSSYGQAMDADDRRSLLDTIQLEGERLDRYIQNLLDMTRLGHTGLTLNRDWIGVDELIGSAGAAPAALPAAGPPGHRPGRGPADAVGAPGAGRTGDLQRAGECRPSSPRRTRRSASPPAWSRAACASTSATAARAFPRTSARASSTCSTASSAAIAAATAPAWA
gi|348022190|gb|AGHY01002282.1|	fig|487527.6.peg.381	peg	gi|348022190|gb|AGHY01002282.1|_816_325	816	325	-	hypothetical protein				gtgatcgccaccgcctcgcgcccgcagacccgcgactggtgcctgcaactcggcgcgcaccacgtgatcgaccatcgccagccgctggcgccgcagctgcaggcgctgggcatcgaccaggtggacgcggcgctgaacctggccgacaccgaccgctactggcaggcgctgggcgaactgctggcgccgcagggccacgtcggcctgatcgtcgaaccgagcggcccgctgcacatcggcgacccgtacaaggccaagtgcatcggcatccactgggaaatgatgttcgcgcgcgcccgtttccgcaccggggacatgatcgaacagcaccgcatcctggcgcgcaccgccagcctggtggacgcaggcgaactgcgcaccaccctgaccgagacactg…	MIATASRPQTRDWCLQLGAHHVIDHRQPLAPQLQALGIDQVDAALNLADTDRYWQALGELLAPQGHVGLIVEPSGPLHIGDPYKAKCIGIHWEMMFARARFRTGDMIEQHRILARTASLVDAGELRTTLTETLSPINAATLREAHRRLESGSTIGKLALVGWG
gi|348022190|gb|AGHY01002282.1|	fig|487527.6.peg.382	peg	gi|348022190|gb|AGHY01002282.1|_1349_813	1349	813	-	Bifunctional protein: zinc-containing alcohol dehydrogenase; quinone oxidoreductase ( NADPH:quinone reductase) (EC 1.1.1.-); Similar to arginate lyase		FIG00633958	ff	atgaaagcggtcgccaccctccatcccctgccgatcgacgatccccggtcgctgcacgacctcgaccggccgacgccgcccgcgcccggcggccacgacctgctggtgcgggtggaggcggtctcggtcaacccggtggacaccaaggtccgcgccaagggcgcgcccgacggccagcccaaggtgctgggctatgacgccgccggcgtggtcgaggcggtcggtcccgacgtcgacggcttcgaaccgggcgacgaggtctactacgccggcgacatcacccgcgccggcagcaacgcgcagtaccaattggtggatgcgcgcatcgtcgcgcgcaagccctccacgctggacttcgcccaggccgcggcgctgccgctgaccaccctcaccgcctgg…	MKAVATLHPLPIDDPRSLHDLDRPTPPAPGGHDLLVRVEAVSVNPVDTKVRAKGAPDGQPKVLGYDAAGVVEAVGPDVDGFEPGDEVYYAGDITRAGSNAQYQLVDARIVARKPSTLDFAQAAALPLTTLTAWELLFQRMPFDFDDEPQPRPPPAGDRRCRRGRLDRDPAGAGMPASR
gi|348022190|gb|AGHY01002282.1|	fig|487527.6.peg.383	peg	gi|348022190|gb|AGHY01002282.1|_1562_1392	1562	1392	-	Oxidoreductase		FIG00986126	ff	gtgatcatcggcgcacggaccgaggagcagttgcggcagaatctgggagcggtcggctggacgctcgatgccgcccacgtgcaacagctggatgcggccagcgcagcggtaccggcgtatccgtactggcaccagcgcggcttcgccgagcgcaatccgcggccggtctga	MIIGARTEEQLRQNLGAVGWTLDAAHVQQLDAASAAVPAYPYWHQRGFAERNPRPV
gi|348022192|gb|AGHY01002281.1|	fig|487527.6.peg.384	peg	gi|348022192|gb|AGHY01002281.1|_425_198	425	198	-	FIG022199: FAD-binding protein		FIG00022199	ff	gtgcaggcgcgcagcgccgatggcgtacgccactaccgaccgcgctacctgatcgacgccagcggccgcgacaccttcctcggcaacaagctcaagctcaagcgcgccaacccgcggacaccagtcggcggcgctgttcagccatttccggcggcgggcgcgggcgcccgggcgaggacgccggcaacatcagcatctaccgtcacgcgcacggctggatgtggctga	MQARSADGVRHYRPRYLIDASGRDTFLGNKLKLKRANPRTPVGGAVQPFPAAGAGARARTPATSASTVTRTAGCG
gi|348022194|gb|AGHY01002280.1|	fig|487527.6.peg.385	peg	gi|348022194|gb|AGHY01002280.1|_24_227	24	227	+	hypothetical protein				gtgaacgccctgccgcgctggatctggctgcagacccgcggccgcggcccgcgccggcatcgacggcgccgaaccgcggcaaggtgcgggtggtgccgggtgcggtctacccgcgccctgctcggcctgaccgcgctgttgcccaatgccctgctgctgcgcctgatgggacgcggctcgcatcggatcaggtcggtggaatag	MNALPRWIWLQTRGRGPRRHRRRRTAARCGWCRVRSTRALLGLTALLPNALLLRLMGRGSHRIRSVE
gi|348022196|gb|AGHY01002279.1|	fig|487527.6.peg.386	peg	gi|348022196|gb|AGHY01002279.1|_111_305	111	305	+	Carbamoyl-phosphate synthase large chain (EC 6.3.5.5)		FIG00000111	ff	gtgtatatcgtcaacaccaccgagggccgggcggcgatctccgactcgttctcgatccgtcgcgaagccctgcagcatcgcgtcacctattcgaccacggtcgccggcgcgcgtgcgctggtgcattcactggaattccgcggcaccggtccggtctgggcgctgcaggaactgcacaaggagctggaagcgtga	MYIVNTTEGRAAISDSFSIRREALQHRVTYSTTVAGARALVHSLEFRGTGPVWALQELHKELEA
gi|348022196|gb|AGHY01002279.1|	fig|487527.6.peg.387	peg	gi|348022196|gb|AGHY01002279.1|_320_778	320	778	+	Transcription elongation factor GreA		FIG00000288	isu;Transcription_factors_bacterial	atgcaaggcgcgcagcggctgcgcgaggaactggatcacctgaagtcggtcaagcgtcccgaggtcatcaccgcgatcgccgaggcgcgtgcgcacggcgatctcaaggaaaacgccgagtaccacgccgcgcgcgagcagcagggcttcatcgaaggccgcatcaagcagctggagagcgagctgtcgcacgccgaggtcatcgacgtcagcaagctggcggtcggcagcaaggtggtgttcggcgccaccgtgaccctggccgacgtggagaccgacgaggagaagcgttaccagttggtcggcgacctggaggcggacatcaagcagggcctgatcgcgatttcctcgccgttggcgcgtgcactgatcggcaagatggaaggcgacagcgtcagc…	MQGAQRLREELDHLKSVKRPEVITAIAEARAHGDLKENAEYHAAREQQGFIEGRIKQLESELSHAEVIDVSKLAVGSKVVFGATVTLADVETDEEKRYQLVGDLEADIKQGLIAISSPLARALIGKMEGDSVSIDAPAGRREYEIVSVAYVG
gi|348022198|gb|AGHY01002278.1|	fig|487527.6.peg.388	peg	gi|348022198|gb|AGHY01002278.1|_186_902	186	902	+	transcriptional regulator, AraC family		FIG01215087	ff	gtgaccgaccgcctggccgccttgttgacccacttctcggtcagcgccgaggtcttccacgccggcacgctgtgcggcctgcaccggctcgacgatggcgaccgcggccagttgcatctgctgcgccagggcagcgtggtcgtccacaacggcgatggcagcgtgctgcggatcgaccggcccagcctgctgctgtacccgcaggccatgccgcaccgcttcgagaccgatgcgcagcgcggcgcggatttcgcctgcgcgcatttgcgcttcagcggcggcgcggccaatccgctggtgcgcgccttgccggcctgcatctgcctgccgctggacacgctgcgccagggtgagacgctgctgcacctgctgttcgaggaagcgttcgcccagcattgc…	MTDRLAALLTHFSVSAEVFHAGTLCGLHRLDDGDRGQLHLLRQGSVVVHNGDGSVLRIDRPSLLLYPQAMPHRFETDAQRGADFACAHLRFSGGAANPLVRALPACICLPLDTLRQGETLLHLLFEEAFAQHCGRQAVLNRLFEVVLVHVIRELMEQGLTDGGMLAGMADARLAAGVDQHPRRPGAAVDAGEPGRPCRHVAQCIRAQFSRDPRLHAGPVPAGLAHCPGAARPARRTAA
gi|348022198|gb|AGHY01002278.1|	fig|487527.6.peg.389	peg	gi|348022198|gb|AGHY01002278.1|_860_1006	860	1006	+	hypothetical protein				ttgccctggtgcagcgcggcctgcgcgaaggacggccgcctgaagcagcttgccgacgaggtgggttacggcagcgaggccgcggtgtcgcgcgtgttcaaggcgcaggtcgggcagagcccgcgcgcgtggaggcaggcacgctga	MPWCSAACAKDGRLKQLADEVGYGSEAAVSRVFKAQVGQSPRAWRQAR
gi|348022200|gb|AGHY01002277.1|	fig|487527.6.peg.390	peg	gi|348022200|gb|AGHY01002277.1|_22_441	22	441	+	Lipid A biosynthesis lauroyl acyltransferase (EC 2.3.1.-)		FIG00000545	ff	gtgcgcgccgagggcccggcggtgcggcagttgttcaagacgctcaaggacggcggcgcggtcggcatcctgcccgaccagcagcccaaggccggcgacggcgtgttcgcgccgttcttcggcgtaccggcactgaccatgaccctggtcaaccgcctggccgagcgcaccggcgccaccgtgctgttcgcctggtgcgagcgtgtcggcaacgacctggagttcgccttgcacgtgcagccggcgccgccggacatcgccgatgccgacccgctgcgcgcggccaccgcgctcaacgaaggcgtggagcgggtggcgcggcgcgacccggcgcagtaccagtggacctacaagcgctacaccctgcgcccggacccggccgagcccaatccctacgcc…	MRAEGPAVRQLFKTLKDGGAVGILPDQQPKAGDGVFAPFFGVPALTMTLVNRLAERTGATVLFAWCERVGNDLEFALHVQPAPPDIADADPLRAATALNEGVERVARRDPAQYQWTYKRYTLRPDPAEPNPYATERHPH
gi|348022200|gb|AGHY01002277.1|	fig|487527.6.peg.391	peg	gi|348022200|gb|AGHY01002277.1|_646_467	646	467	-	Phosphinothricin N-acetyltransferase (EC 2.3.1.-)			ff	gtgcacgtgctggtcggcggcatcgacgccagcaatgccggcagcatcgccctgcacgagcaactgggcttcgtgcatgcgggcaccgtgcgcgaggccggcttcaagttcgggcgctggctggacctggcgttctaccagcgcatcctcgccggtccggcgcagccgcacgacgattag	MHVLVGGIDASNAGSIALHEQLGFVHAGTVREAGFKFGRWLDLAFYQRILAGPAQPHDD
gi|348022208|gb|AGHY01002273.1|	fig|487527.6.peg.392	peg	gi|348022208|gb|AGHY01002273.1|_85_303	85	303	+	hypothetical protein				atgggctacgacgtcaatctctcgcagatgctgtacgactgggggcgcgtgtcgagccgggtggcgaatgcacgcgcgcagcagcgcgggcaggacgcggcgggtggaggtggccgccgacgacgccgcgctgcagatcgtggaggtgtatctggacgtgttggcggcgcatgcagcggctgcaggcggtgcaagcgcatctgcaacgcctgcaggtga	MGYDVNLSQMLYDWGRVSSRVANARAQQRGQDAAGGGGRRRRRAADRGGVSGRVGGACSGCRRCKRICNACR
gi|348022210|gb|AGHY01002272.1|	fig|487527.6.peg.393	peg	gi|348022210|gb|AGHY01002272.1|_626_210	626	210	-	RND multidrug efflux transporter; Acriflavin resistance protein		FIG00132942	icw(1);Multidrug_Resistance_Efflux_Pumps	gtgaccgacgttgagaacgcgctggcccgcgagaacgtggaactgccggccggccgcctggaatcggccgatcgcgacttcaccctgcgcgtggagcgcggctaccgcacgccggcggacttcgccgcgatcccgctgggcaagggccgcgacggctacgtggtgcggctgggcgacgtggccaaggtggaactggcctcggccgagcgccgcgcctacttccgcagcaacggcgtgcccaacgtcggcctgggcatcgtcaagacctccaccgccaacagcctggacgtggcccgcgccgcgcgcgcggcggcgcagcagatccagcagaccctgcccaagggcacgcagatcttcgtcgccttcgattccacgggttcatcgatgcctcggtggaac…	MTDVENALARENVELPAGRLESADRDFTLRVERGYRTPADFAAIPLGKGRDGYVVRLGDVAKVELASAERRAYFRSNGVPNVGLGIVKTSTANSLDVARAARAAAQQIQQTLPKGTQIFVAFDSTGSSMPRWNASTTL
gi|348022210|gb|AGHY01002272.1|	fig|487527.6.peg.394	peg	gi|348022210|gb|AGHY01002272.1|_969_613	969	613	-	RND multidrug efflux transporter; Acriflavin resistance protein		FIG00132942	icw(1);Multidrug_Resistance_Efflux_Pumps	atggcgtggccgacatcagcatcgagttcccgcgccacccgcgacatcgaggccgctgccaacgacgtgcgcgacgcggtcagccgcgtgctcgaccgcctgcccgacgaggccgacgcgccggagatcgccaaggtcgaggccgatgccgatgccatcctgtggctcaacatgagctccagcacgatggacgcgctgcagttgtccgactacgccgaacgctacgtggtggaccggctctccagcatcgacggcgtcgcccaggtgcgcctgggcgggcgccagcgctatgcgatgcggatctggctggaccgcgacccagttggccgcgcgcgcgctcaccgtgaccgacgttga	MAWPTSASSSRATRDIEAAANDVRDAVSRVLDRLPDEADAPEIAKVEADADAILWLNMSSSTMDALQLSDYAERYVVDRLSSIDGVAQVRLGGRQRYAMRIWLDRDPVGRARAHRDRR
gi|348022214|gb|AGHY01002270.1|	fig|487527.6.peg.395	peg	gi|348022214|gb|AGHY01002270.1|_16_639	16	639	+	Beta-glucosidase (EC 3.2.1.21)		FIG01290319	idu(5);Fructooligosaccharides(FOS)_and_Raffinose_Utilization idu(5);Beta-Glucoside_Metabolism	gtgcgcggcttccaggggccggacctgcgtgccgacgacgcactgctggccacgcccaagcacttcgccgcctacggcgcggtcgccgccggcatggagtacgccagcgtcgatatcgccccgcagaccctgcgcgacgtgcacctgccgccgttccaggccgccttcggcgccggcgcgctaagcgtgatgacctccttcaacgacatcaatggcgtgccggccagcgccaaccacgaactgctgacagagatcctgcgcggcgaatggaagttccccggcgtggtgatctccgactacaccgccgacatggagctgatcgcgcacggctatgcggccgacgagcgcgacgcgaccaagaaggcgttcctggccggcatggacatgagcatgcaaagc…	MRGFQGPDLRADDALLATPKHFAAYGAVAAGMEYASVDIAPQTLRDVHLPPFQAAFGAGALSVMTSFNDINGVPASANHELLTEILRGEWKFPGVVISDYTADMELIAHGYAADERDATKKAFLAGMDMSMQSRLLRRAPAVAGGGRRGADGAAGCVGAPRAGTEGSDRPARRSVPLAGPGARGRPVAHHRARCAGARRGGGARSCC
gi|348022220|gb|AGHY01002267.1|	fig|487527.6.peg.396	peg	gi|348022220|gb|AGHY01002267.1|_528_355	528	355	-	Acetolactate synthase small subunit (EC 2.2.1.6), Xanthomonadales type		FIG00017269	isu;Acetoin,_butanediol_metabolism	gtggcttcgcgccgatctccatcagcggcgcgccggtggccgaggacgccggccgctggcacctgcaactggtggtggacgggcaaccgccccggcgagaccctgcgcctgcagatggagaaggtctacgactgcgaatcggtgcgcgtgaccgcgctggatggggtggtatga	MASRRSPSAARRWPRTPAAGTCNWWWTGNRPGETLRLQMEKVYDCESVRVTALDGVV
gi|348022220|gb|AGHY01002267.1|	fig|487527.6.peg.397	peg	gi|348022220|gb|AGHY01002267.1|_741_589	741	589	-	Acetolactate synthase large subunit (EC 2.2.1.6)		FIG00136692	icw(1);Acetoin,_butanediol_metabolism	ttggcgcagccgggcccggcgctgctgcacgtggccatcgacgcgcgcgccaacgtgtggccgctggtgccgccgaacaccaccaacagcaccatgctggaaagcaatcccgccgcccagcgccaggagacgacacatgcgttaccagcttga	MAQPGPALLHVAIDARANVWPLVPPNTTNSTMLESNPAAQRQETTHALPA
gi|348022222|gb|AGHY01002266.1|	fig|487527.6.peg.398	peg	gi|348022222|gb|AGHY01002266.1|_689_114	689	114	-	Indolepyruvate ferredoxin oxidoreductase, alpha and beta subunits		FIG00016213	isu;Aromatic_amino_acid_interconversions_with_aryl_acids	gtggagcgcgtgcgcgccgccgagcagcgcgtggcccctgcctcgactgcgctgaccgaagcggtggcgcgttatgcgttcaagctgatggcctacaaggacgagtacgaagtggcgcggctgtacaccagcggcgcgttcgcgcagcaggtgcaggcgcagttcgagggcgactaccggctgcgcttccacctggcgccgccgctgttggcgaagaaggacgcgcagggccggctgcgcaagcgcgaatacggcccgtggatgttcaccgcgttcaagtggctggccaagctgcgccgcctgcgcggcggtgccttcgacgtgttcggctacagtgccgagcggcgcggcgaacggcagttgatcgccgactacgtcgccaccgtggacgaactgctg…	MERVRAAEQRVAPASTALTEAVARYAFKLMAYKDEYEVARLYTSGAFAQQVQAQFEGDYRLRFHLAPPLLAKKDAQGRLRKREYGPWMFTAFKWLAKLRRLRGGAFDVFGYSAERRGERQLIADYVATVDELLQRLQADNLGLAVQIASIPEHIRGYGHVKEAHLHDAKQREARLLATWRNPKALHIVQAA
gi|348022224|gb|AGHY01002265.1|	fig|487527.6.peg.399	peg	gi|348022224|gb|AGHY01002265.1|_1445_120	1445	120	-	D-2-hydroxyglutarate dehydrogenase		FIG00005482	isu;COG0277	atgaccgatccgcgcctggatgccctggccctcgccgttcccggcctgcgcctgaagaccgatcctgccgacttggagcactacggccgcgactggacccggcgctggaccccggcgccgctggcgatcgcgctgccggcggacggtggaggaggtgcaggcggtgctgcgctgggccaacgccccacgcggtggcggtggtgccctccggcggtcgccaccggcctgtccggcggcgccgtggccgcgcacggcgagctgggtgctgagcctggagcggatgaacaaggcgctggcgttcgacccggtcgaccgcaccctcaccgtgcaggccggcatgccgctggaagcggtgcacaacgccgcgcgcgagcacggcctgctgtacccggtggactt…	MTDPRLDALALAVPGLRLKTDPADLEHYGRDWTRRWTPAPLAIALPADGGGGAGGAALGQRPTRWRWCPPAVATGLSGGAVAAHGELGAEPGADEQGAGVRPGRPHPHRAGRHAAGSGAQRRARARPAVPGGLRRAWVVLDRRQHRHQRRWHPRDPLRQHPRVDRRAEGGHRQRRAARAQPRLDQEFKRLRLPPVADRLRRHPGHRGRGHPAAHRPAATEQRDAAGAALVRGADAGVRRVPQPPAAGGVRVLHRPRSAARARAWCAGAVRYRLSVLRGHRIRQRQRGAGGGGAGRVRGLHGAGLGAGRRDQPERGAGRAVVAPARRHHRGGGALHAVQERRVGADLGDAGVPGAHPGAARRGLSAVRGGVVRPYRRRQPAHQRAQARRHRAGRVHRRLR…
gi|348022226|gb|AGHY01002264.1|	fig|487527.6.peg.400	peg	gi|348022226|gb|AGHY01002264.1|_640_131	640	131	-	FIG007317: hypothetical protein		FIG00007317	ff	atgcaggccctgcgcgcgcggctgtgcgccgagaccggcctgtccgaagctgcgctgccgttcgtcggcgagctggtgcaggtggaggccgaccaggccgcctggcgtggcgcgatcgagcgcgtgctgcacggcttcgcgcagtcgctgctggtcgacgaacgccactacgccagcgtcgccgactgggtcaacaagacccagctcggcactcgcctggtgtacttccgcgtgcgccacaacgcgccgctgcagcagcgcgagcccgacgcgaagtcgctgctgcgcaagctggagttgcgcgaccacgcttatgcgccgtggctgcgccaggagctggcgcggcgcttcgactacgcctgcgtggacaccgtgtcgcagctgcgcggacgccgagcg…	MQALRARLCAETGLSEAALPFVGELVQVEADQAAWRGAIERVLHGFAQSLLVDERHYASVADWVNKTQLGTRLVYFRVRHNAPLQQREPDAKSLLRKLELRDHAYAPWLRQELARRFDYACVDTVSQLRGRRACDHPRGPGQAPGRPLREGRPPRRRRPQALAARLRQP
gi|348022234|gb|AGHY01002260.1|	fig|487527.6.peg.401	peg	gi|348022234|gb|AGHY01002260.1|_10_258	10	258	+	hypothetical protein				gtggagatcgcacccgggctgcacctgatcgaggcgttcctgccgcagccggtcccccaccggcgcgctgtcgctggcctttcgcccggcgcgaggacgcggtggagcccaccgacctggctgttcttcgataccgagaccaccggccttggcaggcggtaccggcacgcgcgccttcatgatcggcgcggccgactggaccgtgcatcccggccgatggcccgggcctgcgcatccgccagttgctga	MEIAPGLHLIEAFLPQPVPHRRAVAGLSPGARTRWSPPTWLFFDTETTGLGRRYRHARLHDRRGRLDRASRPMARACASASC
gi|348022238|gb|AGHY01002258.1|	fig|487527.6.peg.402	peg	gi|348022238|gb|AGHY01002258.1|_514_113	514	113	-	Type I secretion outer membrane protein, TolC precursor		FIG00028132	idu(1);Ton_and_Tol_transport_systems idu(1);Multidrug_Resistance_Efflux_Pumps	gtgcgccaggccctggcgcagcgcgacatcgcccaggacacctacgagctgcagaagcgcgcgctcgaccgcaacacccgcaacgcctaccagacggtggtggccgggatcagcgagatcgaggcgcggcgcctggcggtggtgtcggcgcaggccgcgttcgacgcctcgcaggtcggcctggaagtgggcacccgcaccgtgctcgacgtggtgcagaaccagcgcaccctgtaccaggcgcagctggcgtacgcgcaggcccgctacaacttcctgcagaaccgcctgctgctgagccaggcgctcggctcgctggacgtggccgaggtgcagtcgatcaacgcgctgctgacccagagcgccgagtccaagctcaactccgcgagcagcacgcag…	MRQALAQRDIAQDTYELQKRALDRNTRNAYQTVVAGISEIEARRLAVVSAQAAFDASQVGLEVGTRTVLDVVQNQRTLYQAQLAYAQARYNFLQNRLLLSQALGSLDVAEVQSINALLTQSAESKLNSASSTQ
gi|348022240|gb|AGHY01002257.1|	fig|487527.6.peg.403	peg	gi|348022240|gb|AGHY01002257.1|_394_5	394	5	-	hypothetical protein				atgccgatccgcacgatgccgaccgcggcgccgcgccacgtgcgcgcctacaccgcgctgatcgacgcgcactaccgcgagcactggccgctggcgcgctatgccgaccggctcgggctgagccgcagccatctcaaacacgctgtgccggcgcctggccggtgcctcggcgctggaactgctgcagcgccggatcatgctcgaggcgcggcgcagcctggtctacaccacgttgaccgtgcagcagctcgccacggtgctgggctatgcggacgcggcgtatttcagccgctgcttccgccggcatgccgggtgttcgccgatccagttccggcagcgggcgcaggggtgagcgcgtggggttcgtcgagatggcccggtcgcggctga	MPIRTMPTAAPRHVRAYTALIDAHYREHWPLARYADRLGLSRSHLKHAVPAPGRCLGAGTAAAPDHARGAAQPGLHHVDRAAARHGAGLCGRGVFQPLLPPACRVFADPVPAAGAGVSAWGSSRWPGRG
gi|348022244|gb|AGHY01002255.1|	fig|487527.6.peg.404	peg	gi|348022244|gb|AGHY01002255.1|_60_260	60	260	+	hypothetical protein				ttgcttcgcccgccggccgcctggtcgctgcgcgaccagctcgcgctgctgctgcgcgagatccgttacgaggtgctgcgctggctgcgcagcgccgtcgttcgccttgccgacgttgctgttcccgccgctgttctacctgctgttcggcgtgctgctcaatcatgggcgccacgacgcagcggtgtacctgatggctag	MLRPPAAWSLRDQLALLLREIRYEVLRWLRSAVVRLADVAVPAAVLPAVRRAAQSWAPRRSGVPDG
gi|348022246|gb|AGHY01002254.1|	fig|487527.6.peg.405	peg	gi|348022246|gb|AGHY01002254.1|_638_252	638	252	-	transcriptional regulator		FIG01210230	ff	ttgcgcgaggagagcggcgagcaaccggtgcgcatcagcgaggacgccctgcacaagctgctcagctatgcctggcccggcaacctgcggcagctgcgcaacgtgctgcgcaccgccgccgtgctgtgcgccgacggcgtcatccgcatccccaacctgccgcaggagatcgtcgacgccgacagcgggccgtgcctgctcggcgacgatgcgcacgccgccgacggcgtgcccggccgcgtcgccctggacagcgccgagcgcagcgtgctgcagcagcaactcgagcgccaccgctggaacgtcagccgcaccgccgatgcgctgggcatcagccgcaacaccctgtatcgcaagttgcgcaagcatgggttggcgacggtgtga	MREESGEQPVRISEDALHKLLSYAWPGNLRQLRNVLRTAAVLCADGVIRIPNLPQEIVDADSGPCLLGDDAHAADGVPGRVALDSAERSVLQQQLERHRWNVSRTADALGISRNTLYRKLRKHGLATV
gi|348022258|gb|AGHY01002248.1|	fig|487527.6.peg.406	peg	gi|348022258|gb|AGHY01002248.1|_96_617	96	617	+	FIG01211032: hypothetical protein		FIG01211031	ff	gtgctggagcgcaagcgcctgtccttcgactaccgcgcccgctccaccgacgaatcgaccaagcgcacggtgtcgccgcagcgcatcacccactaccgcgacaactggtacctggacgcctgggaccatggccgcgacgcggtgcgcagcttcgcggtggaccgcatcaaccatgcgcgcctgctcgaccagccggcgcaggacgtggccgacgccgagctggattcgcagctggcggccagctacggcatcttctccggcgcgcccaagggctgggccaccatcgtgttcagccccaaggcggcgcgctgggtcgccgacgagcactggcattccaagcagcagggccgcttcctggccgacggccgctacgaactgaaggtgccctacagcgtctcg…	MLERKRLSFDYRARSTDESTKRTVSPQRITHYRDNWYLDAWDHGRDAVRSFAVDRINHARLLDQPAQDVADAELDSQLAASYGIFSGAPKGWATIVFSPKAARWVADEHWHSKQQGRFLADGRYELKVPYSVSRELLMDVLHYGSDAEIVEPRSLREQAKALLSLALSNYSDD
gi|348022260|gb|AGHY01002247.1|	fig|487527.6.peg.407	peg	gi|348022260|gb|AGHY01002247.1|_41_1297	41	1297	+	Phosphoribosylamine--glycine ligase (EC 6.3.4.13)		FIG00000235	ff	gtgctgcgccccgagggccagggcttcgccgtcgccgccgagcgcaccggcggcacctacggcagcaacgggcagccgggcgaggtcggcatcgtccgcgccggcagcgacttctacgggttccgcgtggaggacggctggttcggccagggctatgcgctgcaatcgcaaacgctgatcctgcccggccccaagggcctggtcgatgccggcagcctgcgcagccacatcgacaacggcgctgccgccgactgcgacgccgccgacgcggcagcggactgcaaggccggtcagttcgacctcgacttcgccctgcgcttcgacgaccgcgaccacgccgcccgcgtgtggccgctgctgatcgaggaaaccggcgtggattgcggccagcgtcaggtc…	MLRPEGQGFAVAAERTGGTYGSNGQPGEVGIVRAGSDFYGFRVEDGWFGQGYALQSQTLILPGPKGLVDAGSLRSHIDNGAAADCDAADAAADCKAGQFDLDFALRFDDRDHAARVWPLLIEETGVDCGQRQVQREHRFVLDTRPGPTISPKRCSAKAAHEARAPGAADPLSPAIWNSAMKLLVIGSGGREHALAWKLAQSPRVDEVLVAPGNAGTASEAKCRNVPVKVNDLDGLLALAQDEGVALTVVGPEVPLVLGVVDRFRAAGLRIFGPTAAAAQLEGSKAYAKDFLQRHGIPTAFYAVHTEVEAALAYVRDKGAPIVIKADGLAAGKGVIVAMSLAEAEAAVRDMLSGNAFGDAGARVVIEEFLEGEEASFISMVDGHTALPMATSQDHKRVGE…
gi|348022262|gb|AGHY01002246.1|	fig|487527.6.peg.408	peg	gi|348022262|gb|AGHY01002246.1|_414_88	414	88	-	Rod shape-determining protein MreC		FIG00000460	isu;CBSS-354.1.peg.2917 isu;Bacterial_Cytoskeleton	gtgcacgtcggccaggcggtgatcgacgccggcggcctgatgggccaggtgatcgcggtgaccccgctgcattccaccgtgctgctgctgaccgatcccgaccatgcggtgccggtgacggtggcgcgcaacggcgtgcgcctgattcgtctatggccgcggcggcagcctggagctgcgcgacatcccgctcagcgcccggggtcgaggtgggcgacgagatcgtcacctccggcctgggcggccgcttcccggccggcttcccggtcggcaccatctccgccttgcgcccggacgacacccatgccttcctggtcggcgaactga	MHVGQAVIDAGGLMGQVIAVTPLHSTVLLLTDPDHAVPVTVARNGVRLIRLWPRRQPGAARHPAQRPGSRWATRSSPPAWAAASRPASRSAPSPPCARTTPMPSWSAN
gi|348022264|gb|AGHY01002245.1|	fig|487527.6.peg.409	peg	gi|348022264|gb|AGHY01002245.1|_407_562	407	562	+	hypothetical protein				gtgcaggtgctggtggtgaaggagtcggcgcaggggcgaacgccgcgtggcggccacgccggagacggtcaagaaactggtcgcgctggggcgcgcaggttcggtcgagccgcaaagcgggggtgtcggcagggttcgtcgatgacgcctacctag	MQVLVVKESAQGRTPRGGHAGDGQETGRAGARRFGRAAKRGCRQGSSMTPT
gi|348022268|gb|AGHY01002243.1|	fig|487527.6.peg.410	peg	gi|348022268|gb|AGHY01002243.1|_26_253	26	253	+	Sensor histidine kinase		FIG01111726	ff	atggtcaccgacatcggcatgccgggcatggacggctatggcctgatccgcaccgtgcgcgagaacatgggtctgggcgcggacgaactgccggcggtggcggtgaccgcgctggcgcgtgccgatgatcgccagcgcgcgctgcagtccggcttccaggagcacctggccaagccctacagcgtggcgcaactggtctcggcggtacgcttcgcgcggcagcgctag	MVTDIGMPGMDGYGLIRTVRENMGLGADELPAVAVTALARADDRQRALQSGFQEHLAKPYSVAQLVSAVRFARQR
gi|348022268|gb|AGHY01002243.1|	fig|487527.6.peg.411	peg	gi|348022268|gb|AGHY01002243.1|_327_647	327	647	+	hypothetical protein				atgaccaagtatgccaagcgtgtccacaccgaccaggcgcagatccaggcactggaagaactggccaagcaactgccggagcagtccaacgtgcgcatcgaactcgaggacggcagcaccttcctcggtacggtgacgatccgtcccagcatccagctgttccgcgatgccaacgagcaggaaggcagcaatgcgcaggtgcgcatcgacgggctggacgatcccgccgagcaccgctacctgtggctggacgaaatccgcagcgtgcgccagctgccggcgcggccctgggacatcgatccgcgcggcgacgcctcttga	MTKYAKRVHTDQAQIQALEELAKQLPEQSNVRIELEDGSTFLGTVTIRPSIQLFRDANEQEGSNAQVRIDGLDDPAEHRYLWLDEIRSVRQLPARPWDIDPRGDAS
gi|348022268|gb|AGHY01002243.1|	fig|487527.6.peg.412	peg	gi|348022268|gb|AGHY01002243.1|_755_964	755	964	+	L-sorbosone dehydrogenase				gtgttgtgtgcgctcagcgccgccctgctcgccgcctgcggcgacaccgccaagcaccccatcgaggacggcatgggaccggatccggtgctgcccgatccggtcaagcgcatgatccccacggtcaagatcgccgaggtcaagcgctgggccgatggcgccgcgtccggtgcccgccgccgacctggcggtgcaggccttcgcccgtga	MLCALSAALLAACGDTAKHPIEDGMGPDPVLPDPVKRMIPTVKIAEVKRWADGAASGARRRPGGAGLRP
gi|348022268|gb|AGHY01002243.1|	fig|487527.6.peg.413	peg	gi|348022268|gb|AGHY01002243.1|_924_2057	924	2057	+	L-sorbosone dehydrogenase			ff	gtgcccgccgccgacctggcggtgcaggccttcgcccgtgatctcgaccatccgcgctggctgtacgtgctgcccaacggcgacgtgctggtcgccgagaccgccgagccgccggcgccggaaaaggagagcagcggcctgcgcgacaagatccagggcgcgatgatgtccaaggccggcgccaccgtgcccagcgccaaccgcatcaccctgctgcgcgatgccgacggcgacggcgtcgccgaggtgcgcacccagttcctcaagggcctgtactcgccgttcggcatggccctggtcggcgaccgcctgtacgtggccaacgccgatgccctggtcagtttcccgtacaaggatggcgatacgcagatcaccgccgcgcccagcttcgtcgccaat…	MPAADLAVQAFARDLDHPRWLYVLPNGDVLVAETAEPPAPEKESSGLRDKIQGAMMSKAGATVPSANRITLLRDADGDGVAEVRTQFLKGLYSPFGMALVGDRLYVANADALVSFPYKDGDTQITAAPSFVANLPGGINHHWTKSLLASRDGKKLYVGVGSNSNVAENGMEQELNRAAILEVDAASGATRVFASGLRNPVGLAWQPGTDTLWTVVNERDELGSDLVPDYLTSVREGGFYGWPYSYYGQHVDERVQPQNAEMVASAIKPDYALGAHTASLGLAFYEGALLPPTYRGGAFIGQHGSWNRDPPSGYKVIYVPFANGKPSGKPQDVLTGFLDAEGRAQGRPVGVAVDKPGALLVADDVGNVVWRVTPKSGK
gi|348022272|gb|AGHY01002241.1|	fig|487527.6.peg.414	peg	gi|348022272|gb|AGHY01002241.1|_746_180	746	180	-	1,2-dihydroxy-3-keto-5-methylthiopentene dioxygenase (EC 1.13.11.54)		FIG00002107	isu;Methionine_Salvage	atgagccgactccgcatcttcgccgacaccactcccgacgcgccgctgttcgacagccgcgatggcgacgcgatcgccgccgaactgcgcaagatcggcgtcaccttcgagcgctggcaggccaaccagccgatcgaggccggcgcgtcgccggaggcggtcatggccgcctacaagaccgacatcgaccgcctggtcgccgccaacggcttcaagaccgtggacgtggtcagcatcgcaccggacaacccgcagcgcgaggaaatgcgcaagaagttcctcgacgagcacttccacaaggaagacgaggtgcgcttcttcgtcgccggctccggcctgttcaccctgcacgtggacggcaaggtctacgagatcgagtgcgtgcagaacgacctgatc…	MSRLRIFADTTPDAPLFDSRDGDAIAAELRKIGVTFERWQANQPIEAGASPEAVMAAYKTDIDRLVAANGFKTVDVVSIAPDNPQREEMRKKFLDEHFHKEDEVRFFVAGSGLFTLHVDGKVYEIECVQNDLIAVPDGTHHWFDMGPEPRFVAIRFFTEPDGWVGHFTGTDIAQRFPRYEATLRGEAH
gi|348022276|gb|AGHY01002239.1|	fig|487527.6.peg.415	peg	gi|348022276|gb|AGHY01002239.1|_334_1338	334	1338	+	FIG01111779: hypothetical protein		FIG01111776	ff	atgaaatcttctttgcgtctggcggcgctggccgccgctgtgtccgttttcatgaccgcctgcggcggcaagccctcggccacgccgaccgattccgatgccagtgccgatgccagccatgcctccgccgataccgctggcagcgaaacggatcaggccctgaccagcaagctcaacgcctacatcgaatgcttcaacaaggtcgatgggcgcatccacgaaggcgcgcagcagtacatccgctggatggccgaccccaaggccggcccgaccggcaaggaaaccagcgtgtatgggccggccccgatcgacgagtacgcgatgaagctgtgcgatgcgccgatgacgcaggcgatcgcggccaagccggcgctgccggcgctggatgcggcggcgaag…	MKSSLRLAALAAAVSVFMTACGGKPSATPTDSDASADASHASADTAGSETDQALTSKLNAYIECFNKVDGRIHEGAQQYIRWMADPKAGPTGKETSVYGPAPIDEYAMKLCDAPMTQAIAAKPALPALDAAAKRYLAALKTLQPLANQARDYYDREDYQDDQFAKGKQLHAPLMAALSEFHEASEAFSHELEAQNDAAQREQLKAMEKAEGRTREFYRLSMMLEAKEIAGLMQDDDFDTAKATALVAGFNRLSDEAHAKVANQEPGKSDWAGFESAAENFRKESKARIKRVADKIPYSAFEQRSLDNPIVAPEGSPARLLKSYNDLVFQSNRQQ
gi|348022288|gb|AGHY01002233.1|	fig|487527.6.peg.416	peg	gi|348022288|gb|AGHY01002233.1|_13_177	13	177	+	hypothetical protein				gtgctgcacgtctacgaccggctacgacctggccgcactcccgcgccgctacacggtgggcgccggcgcgacgctggacggcacctggaccacctacgacggcgactacgatctgtggctgctcggccccaacggcttcccctcgccactaccgcggtgacctga	MLHVYDRLRPGRTPAPLHGGRRRDAGRHLDHLRRRLRSVAARPQRLPLATTAVT
gi|348022292|gb|AGHY01002231.1|	fig|487527.6.peg.417	peg	gi|348022292|gb|AGHY01002231.1|_27_347	27	347	+	TonB-dependent receptor		FIG00004179	idu(60);Ton_and_Tol_transport_systems	gtggtcaacttcatcctgcgcaagaacttcgaaggcggcgaagtctccgccaactacggccagaccagccgcggcgacggcgcgcgccagggcggcagcttcaccttcggcaagacctgggaccgcggcaacgtcgtggtcggcctggactacaacaagcagaaggacgtctccaccgccaaccgcgcgttctccaagtacgcgatgtacctgtccagcggcagtgtttacaagggcggttccgcgcgtcgccgagcggctactacaagctgccggcggcgacgctggcgctcaacggccgcaagcccgatggcgcgctga	MVNFILRKNFEGGEVSANYGQTSRGDGARQGGSFTFGKTWDRGNVVVGLDYNKQKDVSTANRAFSKYAMYLSSGSVYKGGSARRRAATTSCRRRRWRSTAASPMAR
gi|348022296|gb|AGHY01002229.1|	fig|487527.6.peg.418	peg	gi|348022296|gb|AGHY01002229.1|_59_202	59	202	+	Adenosylmethionine-8-amino-7-oxononanoate aminotransferase (EC 2.6.1.62)		FIG00012547	isu;YhgI,_YhgH isu;Biotin_biosynthesis_Experimental	ttgcgccgtggcctgatcctacgcgccaccaacgacgcgatgctgctgtcgccgccgctgatcctcagctgcgcccaggtcgacgaactgttcgacaaggcctggctggcgctggaggacacggcgcaggccctgggcaaatag	MRRGLILRATNDAMLLSPPLILSCAQVDELFDKAWLALEDTAQALGK
gi|348022296|gb|AGHY01002229.1|	fig|487527.6.peg.419	peg	gi|348022296|gb|AGHY01002229.1|_274_837	274	837	+	Putrescine ABC transporter putrescine-binding protein PotF (TC 3.A.1.11.2)		FIG00771520	icw(1);Polyamine_Metabolism	atggacctgcggagacctgccatgaccttgcgactgctcactctatccctggccacggcgctgctcgccggctgcggcggttccggcagcgacgcggacaaggcggggcagggcgaggcgaaggtgctcaacgtgtacaactactcggactacatcgccgagaacacgattcccgagttcgagaagcagaccggcatcaaggtcacctatgacgtcttcgacagcgacgagatggtggagaccaagctgctggccggcggcagcggctacgacgtggtggtgccgacgctgaacttcttcggccggcagatccaggcgggcgtgttcctgccactggacaagagcaagatcccgaacctggccaatctcgatccgcagatcatgcagcgcatcgcgcag…	MDLRRPAMTLRLLTLSLATALLAGCGGSGSDADKAGQGEAKVLNVYNYSDYIAENTIPEFEKQTGIKVTYDVFDSDEMVETKLLAGGSGYDVVVPTLNFFGRQIQAGVFLPLDKSKIPNLANLDPQIMQRIAQQDPGNKYGVPYMVGTTGIGYNVDKVKAAFGSTTSPTAGTWCSSRRTWPSSRTAA
gi|348022296|gb|AGHY01002229.1|	fig|487527.6.peg.420	peg	gi|348022296|gb|AGHY01002229.1|_792_1415	792	1415	+	Putrescine ABC transporter putrescine-binding protein PotF (TC 3.A.1.11.2)		FIG00771520	icw(1);Polyamine_Metabolism	gtgttcaagccggagaacctggccaagctcaaggactgcggcgtgaccctgctggacacgccctcggacctgatcccgatcgcgctgcattacctgggcgaggatccgcacaccacagaccaggccaagatcgagcaggccgcggcgctgatcaagcgcatccgcccgtacgtgcagaacttccactcctcgcaatacgtgacctcgctggccaacggcagcacctgcctggcggtgggctggtcgggcgacatcatccaggcgcgcgatcgcgccgaggaagccaagaacggcgtgcatgtggcctattcgattcccaaggaaggcgcgccgcagtggttcgacatgctggccatccccaaggacgccaagcatccggacaacgcctacgcgttcatc…	MFKPENLAKLKDCGVTLLDTPSDLIPIALHYLGEDPHTTDQAKIEQAAALIKRIRPYVQNFHSSQYVTSLANGSTCLAVGWSGDIIQARDRAEEAKNGVHVAYSIPKEGAPQWFDMLAIPKDAKHPDNAYAFINYLLTPKVAAANTDFIHYANPVPQATPLVDAAIRNDPTIYPPPEVAAKMFTYSINPPEVDKLYTRLWTEIKTGR
gi|348022298|gb|AGHY01002228.1|	fig|487527.6.peg.421	peg	gi|348022298|gb|AGHY01002228.1|_1124_93	1124	93	-	Sulfate adenylyltransferase subunit 1 (EC 2.7.7.4) / Adenylylsulfate kinase (EC 2.7.1.25)		FIG00133521	isu;Cysteine_Biosynthesis isu;Cysteine_Biosynthesis isu;O-Methyl_Phosphoramidate_Capsule_Modification_in_Campylobacter	gtgctggtcggtgccgaaccggtaccgagcgcggtggccgggcaggcggtgacgctgaccctgaccgaggagatcgatgtcagccgtggcgatgtgatcgccgccgccgacgatccgccggaggtggccgaccagttcgccgcgcacgtgctgtggatggacgatgccgcactgctgcccggtcgcccgtactggctgaagatcggtgcgcgcaccgtggccgccagcgtcaccgagatcaagcaccgcatcgacgtcaacacgcaggagcggctggccgccaagcgactggaactcaacgaggtcggctactgcaacctggcgctggaccagccgatcgccttcgctccgtatgcgcaggatcgcacgctcggcggcttcatcctgatcgaccgccac…	MLVGAEPVPSAVAGQAVTLTLTEEIDVSRGDVIAAADDPPEVADQFAAHVLWMDDAALLPGRPYWLKIGARTVAASVTEIKHRIDVNTQERLAAKRLELNEVGYCNLALDQPIAFAPYAQDRTLGGFILIDRHSNATVAAGTLDFALRRAGNVHWQHLDVDKAARARIKGQTPKVLWFTGLSGAGKSTIANLVDKRLHALGYHTFILDGDNVRHGLNRDLGFTAEDRVENIRRVAEVARLMTDAGLIVLVSFISPFRAERQLARERFGEGEFLEVFVDVPLPVAEARDVKGLYAKARAGLIPNFTGIDSPYEAPERPELHLHADGDNVEALAAQVLAALGLQD
gi|348022306|gb|AGHY01002224.1|	fig|487527.6.peg.422	peg	gi|348022306|gb|AGHY01002224.1|_41_358	41	358	+	hypothetical protein				gtgcacgtcgggcacttccacaacgtgctggatccggatggctacgggccgctgctgcgggtggcgcgacgcagccggccggactggctggtcggcaacttcggcaaggagtactggccgctgctgctggccgggcgggcgctgggcatccccgtcacgctgttccgccacccgcaccccggcgatgagcgcgctgtccggctatgccatcccgcggctggcggcgcgcttcttcgcggtgtcgcactacgcgcgccaggccctacctggagcgcggcgtcccggaagcgctggtgcaggtgctgtacaacccggtga	MHVGHFHNVLDPDGYGPLLRVARRSRPDWLVGNFGKEYWPLLLAGRALGIPVTLFRHPHPGDERAVRLCHPAAGGALLRGVALRAPGPTWSAASRKRWCRCCTTR
gi|348022308|gb|AGHY01002223.1|	fig|487527.6.peg.423	peg	gi|348022308|gb|AGHY01002223.1|_418_828	418	828	+	Leucine-responsive regulatory protein, regulator for leucine (or lrp) regulon and high-affinity branched-chain amino acid transport system		FIG00003800	idu(1);Glutamine,_Glutamate,_Aspartate_and_Asparagine_Biosynthesis	atgggcgcatcgcactggcggcgctggggcggcgcatcgggctgtcgcagccggcgatgtccgagcgtgtgcgtgcggctcgaggaaaggggggtgatcaccggctacaccgccagggtcgacccgcgcgcgctgggcctggcgacctcggccatcgtccgcctgcgcaccacgcatgcgcagatcggcgcatgcctggaacagttcgcgcagatgccgcaggtgctggacgtgcatcgggtcaccggcgaggactgcttcgtgctgcgcgtgctggtgcctgcgccggcgcaactggagccggtgatcgatgccctggcgcgcttcggtgcggtgaccaccagcgtggtgctgcgcagcgagccgccgcgcccgatcggccgcgccttgctggcgttg…	MGASHWRRWGGASGCRSRRCPSVCVRLEERGVITGYTARVDPRALGLATSAIVRLRTTHAQIGACLEQFAQMPQVLDVHRVTGEDCFVLRVLVPAPAQLEPVIDALARFGAVTTSVVLRSEPPRPIGRALLALAAE
gi|348022308|gb|AGHY01002223.1|	fig|487527.6.peg.424	peg	gi|348022308|gb|AGHY01002223.1|_1326_838	1326	838	-	carbonic anhydrase, family 3		FIG01111974	ff	gtggaccccgcctgcaccctcatcggcgacgtggtgctggcggacgacgtgtcggtgtggccgggcacggtgatccgcggcgacgtcaactacgtgcgcatcggcgcgcgcagcaacatccaggacggcaccatcatccacgtcagccaccacagcccgttcaacgccgccggctacccgaccctgatcggcgcggacgtgaccgtcggccacggcaccatcatccacgcctgcaccatcgaggacctgtgcctgatcggcatgggcgcgtgcatcctggacggcgccacggtgaagaagtacggcttcgtcggcgccggtgcggtggtcggcccgggcaagaccgtcggcgagggcgaactgtggctgggcaatcccgcacgcaaggcgcgcatgctc…	MDPACTLIGDVVLADDVSVWPGTVIRGDVNYVRIGARSNIQDGTIIHVSHHSPFNAAGYPTLIGADVTVGHGTIIHACTIEDLCLIGMGACILDGATVKKYGFVGAGAVVGPGKTVGEGELWLGNPARKARMLSDKEIESLHYSAQHYVRLKDRYLAAAAPQ
gi|348022310|gb|AGHY01002222.1|	fig|487527.6.peg.425	peg	gi|348022310|gb|AGHY01002222.1|_210_91	210	91	-	hypothetical protein				gtgcagatcgatgccaacctggcgacgttgggcgaacgcctgcgcacgctcaatcgcgaggggggcgggctgcagttgcggtcaccctcggtgttgcaggagggtggcgggcagccgtag	MQIDANLATLGERLRTLNREGGGLQLRSPSVLQEGGGQP
gi|348022320|gb|AGHY01002217.1|	fig|487527.6.peg.426	peg	gi|348022320|gb|AGHY01002217.1|_270_109	270	109	-	hypothetical protein				atgaacctcggcgcctaccccgcatcgctcgccgccttcgagcgctcgctggcattgcacgagcgtgcggacgtgcgcgagagctacgagctggcccggcaactggcggccaaagccgaagaagcgcctgttcgggctgttctcatgatggccagcgcatga	MNLGAYPASLAAFERSLALHERADVRESYELARQLAAKAEEAPVRAVLMMASA
gi|348022322|gb|AGHY01002216.1|	fig|487527.6.peg.427	peg	gi|348022322|gb|AGHY01002216.1|_388_239	388	239	-	hypothetical protein				atgcgcgccagcgagaccgcgcagtcctcccccgaaagggtcgtcgtcactcctgcggagatatcgctcatgaagctgctgttctccatcaagcacctgctctcgtcgaagaagccgctgaagtcgtacgcctggtacatctggtactga	MRASETAQSSPERVVVTPAEISLMKLLFSIKHLLSSKKPLKSYAWYIWY
gi|348022322|gb|AGHY01002216.1|	fig|487527.6.peg.428	peg	gi|348022322|gb|AGHY01002216.1|_753_508	753	508	-	hypothetical tRNA/rRNA methyltransferase yfiF [EC:2.1.1.-]		FIG00004241	isu;RNA_methylation	gtggccggcggcgacgatctgttcgcaacggccttgccgcaacgcctggtctacgtgatgggcgccgagagcgacggcatggatcgcgacttcgcgcaggcctgcgatctgcgcctgtcgatcccgggcaggcggcgcggtggaaagcctcaatgtcgcggccgccaccgcgggtgttgctggggacctggcgcagccggcatccgcacggatccgctgcgcgctgagcacggcgtcacgcgttga	MAGGDDLFATALPQRLVYVMGAESDGMDRDFAQACDLRLSIPGRRRGGKPQCRGRHRGCCWGPGAAGIRTDPLRAEHGVTR
gi|348022324|gb|AGHY01002215.1|	fig|487527.6.peg.429	peg	gi|348022324|gb|AGHY01002215.1|_302_132	302	132	-	hypothetical protein				atggcgccggcgcacgaatgtggactggaagcggccttgcaacagatgagcaagtatttcgagcgcgcgcgcagccaggcgagcgaacgcgccgcgcagagcgcaacgccgcgcccgtcgtacaggcgcaacgtcttcgccggcgatgtggaactgtctctggtgaagtga	MAPAHECGLEAALQQMSKYFERARSQASERAAQSATPRPSYRRNVFAGDVELSLVK
gi|348022324|gb|AGHY01002215.1|	fig|487527.6.peg.430	peg	gi|348022324|gb|AGHY01002215.1|_684_520	684	520	-	luciferase-like				gtgctcggcgatcccggcacggtcgcgcagggcctggccgacttcgtcgcgcggcaccggccggacgagttgctgctgaccgcgaacatccacgatcacgccgcgcgcttgcgctcgttccaactggcggcagaagcgtggacgcaggtggctgcggcggcctga	MLGDPGTVAQGLADFVARHRPDELLLTANIHDHAARLRSFQLAAEAWTQVAAAA
gi|348022332|gb|AGHY01002211.1|	fig|487527.6.peg.431	peg	gi|348022332|gb|AGHY01002211.1|_1001_396	1001	396	-	Oxidoreductase		FIG01218021	ff	gtgcacatcgccgccttcgacatccgcgacaccgacgccctggacgcgatgctggcggcgctgcccgaggcgttccgcggcatcgacctgctggtcaacaacgccggcctggcccagggcaccgcgcccgcgcaggccgcgcaactggacgactggcgcacgatgatcgacaccaacatcaccgcgctggtgacgctgacccatcgcctgctgccgacgctgatccagcgccgtggcgcgatcatcaacatcagttcggtcgccgcgctgtatccctaccccggcggcaatacctacggcggcaccaaggccttcgtcagccagttctcgctgggcctgcgctcggacctgcacggcaccggcgtgcgcgtgaccgcgatcgaaccgggcatggccgag…	MHIAAFDIRDTDALDAMLAALPEAFRGIDLLVNNAGLAQGTAPAQAAQLDDWRTMIDTNITALVTLTHRLLPTLIQRRGAIINISSVAALYPYPGGNTYGGTKAFVSQFSLGLRSDLHGTGVRVTAIEPGMAETEFTLVRTHGDQKASDTLYQGAQPMTADDIAEQIFWVATLPPHLNINRLEIMPVTQSFAGFQVARQPA
gi|348022334|gb|AGHY01002210.1|	fig|487527.6.peg.432	peg	gi|348022334|gb|AGHY01002210.1|_482_243	482	243	-	2-dehydro-3-deoxyphosphogalactonate aldolase (EC 4.1.2.21)		FIG00065872	ff	gtgctgccggcgcaggtaccgctgttcgtggtcggcggcatcaacaccgagaccctgcacgactacctgggcgccggcgcggtcggcgccggcatcggcggcgagctgtaccgccccggccagccgctgacacagacccaggcgcatgccgccgcgcttccgcctcgcctatctggaccgcgcatgaagatcgttccgcctcaccacctaaccacgccgcgccgcgctggctgttcctga	MLPAQVPLFVVGGINTETLHDYLGAGAVGAGIGGELYRPGQPLTQTQAHAAALPPRLSGPRMKIVPPHHLTTPRRAGCS
gi|348022336|gb|AGHY01002209.1|	fig|487527.6.rna.4	rna	gi|348022336|gb|AGHY01002209.1|_625_490	625	490	-	tRNA-Gly-TCC				ggggtggtagctcagttggacagagcgggaatgttccatctctcttgtcgtggttgtcgtcggtcctgttgtgcgcgttgcctggcggatgcaggcggaactccatcggtcgcgggttcgaatcccgcccgccata
gi|348022338|gb|AGHY01002208.1|	fig|487527.6.peg.433	peg	gi|348022338|gb|AGHY01002208.1|_144_13	144	13	-	hypothetical protein				gtggcggccgtgcgtccgccgatgccgatgatgcgcgcgatggcgatgaaggccgaggccgacaccccggtggccgcgggcgaaagcagcgtctcggtcaacctggacgtggtgttcgaactgggcaagtaa	MAAVRPPMPMMRAMAMKAEADTPVAAGESSVSVNLDVVFELGK
gi|348022338|gb|AGHY01002208.1|	fig|487527.6.peg.434	peg	gi|348022338|gb|AGHY01002208.1|_690_229	690	229	-	Protein of unknown function DUF541		FIG00002956	isu;CBSS-316407.3.peg.2816	atgaccgcccatgcccaaaccgccgcgcccggctacgccgtgcccgccgacggcaccctgctcaacatcgccgcgcaggccgaggccaagcgcacgcccgacgtggcggcgatctcggccggcgtggtcacccaggccaccgacagcgccgcggcgatgcgccagaacgccgagcagatgaccaaggtgctggccgcgatccgcaccgccggcatcgccgacaaggatgtgcagaccagcggcgtcagcctcaacccgcagtacaagtacgccgagaaccaggccccgcagatcatcggctaccaggccagcaactcggcaacctcaaggtgcgggacatcgccaagctcggcaaggtgctcgacgcgctggccgcgcagggcgccaaccagatcaacg…	MTAHAQTAAPGYAVPADGTLLNIAAQAEAKRTPDVAAISAGVVTQATDSAAAMRQNAEQMTKVLAAIRTAGIADKDVQTSGVSLNPQYKYAENQAPQIIGYQASNSATSRCGTSPSSARCSTRWPRRAPTRSTAPPSRSTIRNRCTTRPGSMR
gi|348022342|gb|AGHY01002206.1|	fig|487527.6.peg.435	peg	gi|348022342|gb|AGHY01002206.1|_70_648	70	648	+	Transcriptional regulator, TetR family				atgccgcgcatggagatgcgagccgataccgcccaccgccgccgcctgttgctggacgccgccgacgaggtgttctgcgagcacggcgtgctggcgccgctggaattggtggtggagcgggccggactgggccgcgccaccctgtaccgccacttcgccgaccgcaccgcacttatcgcggcgctgctggatcgtggcctggacggcctggagggctgcgcgcgcgagatcggtgcgcggccggacgggctgttcctgctgatgtacgacgtcgccgagcacatcgcgatgtcggcgccgctggccgactattggcggtcgctcccgcgcgagcacccgatgatcgccgcggcgcatacacgggcggatggcgatcctgctgccgttcctgcagcgtgc…	MPRMEMRADTAHRRRLLLDAADEVFCEHGVLAPLELVVERAGLGRATLYRHFADRTALIAALLDRGLDGLEGCAREIGARPDGLFLLMYDVAEHIAMSAPLADYWRSLPREHPMIAAAHTRADGDPAAVPAACDRRRPGVVRTWASRTWPWRLDMLGACQRGSDEAERKALAQRGCRLLCHALATPAAAADL
gi|348022348|gb|AGHY01002203.1|	fig|487527.6.peg.436	peg	gi|348022348|gb|AGHY01002203.1|_1519_1355	1519	1355	-	23S rRNA (guanosine-2'-O-) -methyltransferase rlmB (EC 2.1.1.-)		FIG00001049	isu;RNA_methylation	gtggcgctggtgctgggcggcgagtccgacggcctgcgccggctgacccgcgaacactgcgacggcctggtccgcatcccgatgccgggcgagatcgagagcctcaacgtctcggtcgccgccggcgtgaccctgttcgaggcggtgcggcagcgcatgggctga	MALVLGGESDGLRRLTREHCDGLVRIPMPGEIESLNVSVAAGVTLFEAVRQRMG
gi|348022350|gb|AGHY01002202.1|	fig|487527.6.peg.437	peg	gi|348022350|gb|AGHY01002202.1|_130_17	130	17	-	FIG01211086: hypothetical protein		FIG01211085	ff	gtgctggagaccggctcggtgccgctgccggtgctggagcagcgtatcgatcggttcattgccgagggtgggaagtcgccttggggcgcaggagaggaagcagtagagcattga	MLETGSVPLPVLEQRIDRFIAEGGKSPWGAGEEAVEH
gi|348022352|gb|AGHY01002201.1|	fig|487527.6.peg.438	peg	gi|348022352|gb|AGHY01002201.1|_771_610	771	610	-	Flagellar basal-body P-ring formation protein FlgA		FIG00010671	ff	gtggcgctggtggcccgcagcggcggcctggaagtgcgcatgtccgggcgcgcactgggcgatgcgggcgaaaacgagcgggtgaccgtcgaaaacctgtcgtccaaacgcatcgttcagggaactgtgtcacaaaatggcgacgttttagtgacgcgatga	MALVARSGGLEVRMSGRALGDAGENERVTVENLSSKRIVQGTVSQNGDVLVTR
gi|348022354|gb|AGHY01002200.1|	fig|487527.6.peg.439	peg	gi|348022354|gb|AGHY01002200.1|_376_176	376	176	-	hypothetical protein				gtgcctatgcgggtggccacggccctgaaggaacagggcgaggcgctgcacgccgagccggagaaggtggatcacgtgtacgtactgatcggccggcgcggccgcttgcgctggatgcccgatggcgtggaaggcgatcgcgtcaccatgggcatcctgttcgatgcgcaggggcggccgcggggcatgcagcgccagtga	MPMRVATALKEQGEALHAEPEKVDHVYVLIGRRGRLRWMPDGVEGDRVTMGILFDAQGRPRGMQRQ
gi|348022364|gb|AGHY01002195.1|	fig|487527.6.peg.440	peg	gi|348022364|gb|AGHY01002195.1|_78_389	78	389	+	Transcriptional regulator, GntR family		FIG01210082	ff	gtgctgctggagaccaacgcgatcctcgccgcgtgggcaccgcgcctgctcgaccacgacctggccggctcgctgagcgcggtgctgacccagcgtctgggcttgcggcaggcgcgcagccggctgtcgatgtatccggccacgctcgacgccgagcaggccgcgctgctgcaatccaccgccggcacgccctgcttccgcctgcaacgcgtcagctacgatcccgatggacgcgccgtggagttcgacatcgaatcctggcgccacgacgtgctggaagtgtcggtggatgtatacgcgccgccgaagtaa	MLLETNAILAAWAPRLLDHDLAGSLSAVLTQRLGLRQARSRLSMYPATLDAEQAALLQSTAGTPCFRLQRVSYDPDGRAVEFDIESWRHDVLEVSVDVYAPPK
gi|348022370|gb|AGHY01002192.1|	fig|487527.6.peg.441	peg	gi|348022370|gb|AGHY01002192.1|_16_330	16	330	+	hypothetical protein				gtgctgcagcccggcgaagtcggccgccggcgacaggctggcgctgctggagcggccgcatccgcagtggtcgctggcacgcctggtcgggctgctgtaccgccgcgagatcgacccggcgcaactgcaggacgtgctggcgctgccgctggtgccgaactggcgcaccttgttcgagcggcgcctggcgcagcgcgcggtggaggattgggacaagcgcttgctggggtaggcgccggagtagggcagcaaggcgccaccgttcctgtgtctgtcgtcgtgtggcgtgattgggtggcaccgcgtcggggctga	MLQPGEVGRRRQAGAAGAAASAVVAGTPGRAAVPPRDRPGATAGRAGAAAGAELAHLVRAAPGAARGGGLGQALAGVGAGVGQQGATVPVSVVVWRDWVAPRRG
gi|348022382|gb|AGHY01002186.1|	fig|487527.6.peg.442	peg	gi|348022382|gb|AGHY01002186.1|_11_451	11	451	+	transcriptional regulator		FIG01211514	ff	gtggcgtccccggccttgccgcaactggcgacgctgcgccggcccgagcagatcgcgcagttgcccttgctcaccgacatgtcgccgcagggctggcgcgactggttccgcgccgccggcgtgcgcggcgtggccctgccgccgatgcacaccttcaacgacagcaccgatgcgatgcgcgcggcggtgtacggcgtgggcgcggtgctcgcgcgcaagcacatcgcccagccgtatctgcagcgctacgaactggtgcgcctgcccggcccggcgctgaccgcgcgctactcctactacatcgtgcatccgacccaccgtctgctcagcccggccgccagccacttcgtcgactggctcaagcgcgaggcgctggatgagcgcaccccgatgccggca…	MASPALPQLATLRRPEQIAQLPLLTDMSPQGWRDWFRAAGVRGVALPPMHTFNDSTDAMRAAVYGVGAVLARKHIAQPYLQRYELVRLPGPALTARYSYYIVHPTHRLLSPAASHFVDWLKREALDERTPMPALPAELLGLPPTAG
gi|348022388|gb|AGHY01002183.1|	fig|487527.6.peg.443	peg	gi|348022388|gb|AGHY01002183.1|_682_35	682	35	-	TldD protein, part of proposed TldE/TldD proteolytic complex (PMID 12029038)		FIG00002674	isu;CBSS-316057.3.peg.563 isu;CBSS-354.1.peg.2917 isu;Putative_TldE-TldD_proteolytic_complex	atggcctggagggcgatttcaaccgcaagggcaccagcgtctacgccggtcgcatcggccagcgcgtggcctcgcccggcgtcaccatcggtcgacgacggcaccctggacggtcgccgcggctcgctaaacgtcgacgacgagggcaccgcgaccaactgcaccaccctgatcgaggacggcgtgctggtcggctacatgcaggacacgctcaacgcgcggctgatgggcgtggcgccgaccggcaacggccgccgcgaatcgttcgcgcacctgccgatgccgcgcatgaccaacacctacatgcgcgccggccagcacgacccgcaggagatgatccgctcggtgaagaagggcctgtacgcggtcaacttcggcggcggccaggtcgacatcacc…	MAWRAISTARAPASTPVASASAWPRPASPSVDDGTLDGRRGSLNVDDEGTATNCTTLIEDGVLVGYMQDTLNARLMGVAPTGNGRRESFAHLPMPRMTNTYMRAGQHDPQEMIRSVKKGLYAVNFGGGQVDITSGKYVFSATEAYLIEDGKVTAPVKGATLIGNGPETMQKVRMIGHDLALDEGVGVCGKDGQSVPVGVGQPSLLIDGLTVGGTA
gi|348022392|gb|AGHY01002181.1|	fig|487527.6.peg.444	peg	gi|348022392|gb|AGHY01002181.1|_88_771	88	771	+	FIG01210460: hypothetical protein		FIG01210458	ff	gtggccgcgggcgcactggccggcaccgtattcgggccgctcggcaccttgatcggcgcagcggtgggcgtggttgccggcgcggccgcgggcaagggcgtggccgagcgcatcgaccccaccggcgaggacgcctactggcgcgaggaataccgcaaccgcgactacgccaaggccgattacgactacgaccgcgactacgccgcggcctacggcctggggcctgcaggcgcgcgagcagtatccctcgcgcacctgggacgaacacgagcgcgaactgtcgcacgactggggcaagcgccgcggcgactcgcgcctggagtgggacgaggcgcgactggccgcgcgcggactcctgggagcgcgccgatgccacctaccgcacctacgaggacagcg…	MAAGALAGTVFGPLGTLIGAAVGVVAGAAAGKGVAERIDPTGEDAYWREEYRNRDYAKADYDYDRDYAAAYGLGPAGARAVSLAHLGRTRARTVARLGQAPRRLAPGVGRGATGRARTPGSAPMPPTAPTRTATATTPSASTPWTTAAPTAATTTTARPTAMACRRAAATADRVWDDRLESDLESGWERVKDRSRLSWAQAKAAVREAFDSDRYDRPGRGNPPDPRV
gi|348022394|gb|AGHY01002180.1|	fig|487527.6.peg.445	peg	gi|348022394|gb|AGHY01002180.1|_542_279	542	279	-	hypothetical protein				gtgctgctgcccaataccggcgaggaagccgcgctcggggtaatgcgacgcatcctgtccgagatcgcgcagcggccgatggccgagaccaggcagggaccgctgcacatcagcttctccgcgggcgtggccacgcagggcggccgcgagcgcttcaacagcgcgcaggaactgctgcaggcggccgacgacatgctgtacagcgccaagcacggcggccgcaaccgcgtcaccgcgcgttcgtgcggcgaggcgcaacgctga	MLLPNTGEEAALGVMRRILSEIAQRPMAETRQGPLHISFSAGVATQGGRERFNSAQELLQAADDMLYSAKHGGRNRVTARSCGEAQR
gi|348022396|gb|AGHY01002179.1|	fig|487527.6.peg.446	peg	gi|348022396|gb|AGHY01002179.1|_598_389	598	389	-	hypothetical protein				atgaacgaactttcccaggccgacggcgacgacgcgctgttcgacggccagccgtaccgcatcgtcgaacgcgacggcgtccgctacaccctgctcgggcactgcgcacgtgtccctggccagcgttgccgccgtggaacgggcgatcggcagcggccgcttcgatgcggtggcggtggaacttggatccgcaacgcctgcaggcgctga	MNELSQADGDDALFDGQPYRIVERDGVRYTLLGHCARVPGQRCRRGTGDRQRPLRCGGGGTWIRNACRR
gi|348022398|gb|AGHY01002178.1|	fig|487527.6.peg.447	peg	gi|348022398|gb|AGHY01002178.1|_5_211	5	211	+	hypothetical protein				gtgcgtgcggccacgctggtgttgctgccggcctggatcgaacagcagccgcgcgggctgctgctggccatggcgctgggcaaaccggtgatcgccaccgccgcctgcggtctggctgcagacgatggcgcgtggcgctgcgtggaagccggtgacagcgccgcgctgcgcacgcaggtgctggaggcattgggcctggcgggttga	MRAATLVLLPAWIEQQPRGLLLAMALGKPVIATAACGLAADDGAWRCVEAGDSAALRTQVLEALGLAG
gi|348022402|gb|AGHY01002176.1|	fig|487527.6.peg.448	peg	gi|348022402|gb|AGHY01002176.1|_35_337	35	337	+	hypothetical protein				gtggaggcggtcgccgacgatcggcaggccacgctgcgcgcccagggtgcgccttcgatgatcttctattgctggcacgacgggcaggcgcggcagttgcgcttcagcctggtgtcggcggcgcacggccgcctgccgtttggcgtgccgatccagcagacgtcgttgccggcgctcattgcgcgcatcgtccagaccgactggttcaatccgcaatggggggcagcggacgtggacgacgacgcgatgccggcgtccgcagccctgccggtctacatgcgcacgttgcaccccggcgtctga	MEAVADDRQATLRAQGAPSMIFYCWHDGQARQLRFSLVSAAHGRLPFGVPIQQTSLPALIARIVQTDWFNPQWGAADVDDDAMPASAALPVYMRTLHPGV
gi|348022402|gb|AGHY01002176.1|	fig|487527.6.peg.449	peg	gi|348022402|gb|AGHY01002176.1|_378_1361	378	1361	+	2-C-methyl-D-erythritol 2,4-cyclodiphosphate synthase (EC 4.6.1.12)		FIG00084105	ff	atgtcacacggtacctctgctcctctttctttccgcatcggccagggctatgacgtccacgccttcggcgagggcgaccacatcatgctcggcggcgtgcgcgtggcgcacgagcgcggcgtgcttgcccacagcgatggcgacgtggtgatccacgcgctgtgcgacgccttgctcggcgcgttggcgctgggcgacatcggccagcatttcccgccatcggatccgcgctggaagggcgccgacagcgcgcagttcctcgatcactgcgtgggcctgctgcatgcgcgcggctggcgcctgggcaatgccgatgtcaccgtgatctgcgaacggcccaaggtcggcccgcacgcgcaggcgatgcggcgaacgcctggcggcgctgctgcaggtcga…	MSHGTSAPLSFRIGQGYDVHAFGEGDHIMLGGVRVAHERGVLAHSDGDVVIHALCDALLGALALGDIGQHFPPSDPRWKGADSAQFLDHCVGLLHARGWRLGNADVTVICERPKVGPHAQAMRRTPGGAAAGRTGLHQRQGHHQRKAGLHRPRRRHFGAGGGLAGGTVSELPRAFGAAPLQARMAQQRRGFPGRRAARVRAQRRGRASVADGAQARHEHRLRRAPPGAVGWRGGAGDRLCRHEGPPCGDHPTLFGASAPSAWRRPWTACRTRTCRCWSRTGTTASCRAARWPATRFVLVLREVRGERTAIEARLATDRRARDSQLVR
gi|348022410|gb|AGHY01002172.1|	fig|487527.6.peg.450	peg	gi|348022410|gb|AGHY01002172.1|_86_394	86	394	+	integral membrane protein		FIG01210609	ff	gtgctgctgctgggcgtgcaactgtggcgccacctgcgcggcaccgcgccgctggcctggcgcaacctcggcgccggtctgctgctgggcgcgctcaacttcggcaacatcctgttctacgtgcgcgcgcaccaggccctgccggacagcccggccagcgtgttcgcggcgatgaatctgggcgtgatcggcctgggcaccctgctcggcgtggccgtcttcggcgaacgcaccaaccgctggaaccgcctcggcctgctgctggcggtgccggcgatcgtgctgatcgcgctgggtgcgcgcggctag	MLLLGVQLWRHLRGTAPLAWRNLGAGLLLGALNFGNILFYVRAHQALPDSPASVFAAMNLGVIGLGTLLGVAVFGERTNRWNRLGLLLAVPAIVLIALGARG
gi|348022414|gb|AGHY01002170.1|	fig|487527.6.peg.451	peg	gi|348022414|gb|AGHY01002170.1|_123_311	123	311	+	Peptidyl-prolyl cis-trans isomerase ppiD (EC 5.2.1.8)		FIG01273262	isu;Peptidyl-prolyl_cis-trans_isomerase	gtgggcaagcgctatgcgctgttcgcggtcaccaaggtgacgccgggcgacctgagcaaggtaccggccgagcagcagaccatgttccagcagcagctggcgcagatcgacggcgcggccgatgccaaggcctacgtcgatgcgatgcgcaagcacttcaagatcagcgtgcaggagtcgcagctgtaa	MGKRYALFAVTKVTPGDLSKVPAEQQTMFQQQLAQIDGAADAKAYVDAMRKHFKISVQESQL
gi|348022414|gb|AGHY01002170.1|	fig|487527.6.peg.452	peg	gi|348022414|gb|AGHY01002170.1|_388_609	388	609	+	hypothetical protein				atgcgcgcgttgccgtgggaagtgcgcaacggtggcgcgcaagtgcgcagcgtgcgcctgccgatcgccggcaggcgcgagtggtggcgtgaatgggcggcagacggtacgaccgccgcctcgcctggcgcgagggcctgcgcgctaggcggtgatcgaggccgaacttgctcttcgcgggtcagtgcgcgcggttgccgtcggtgctggacccggtactaa	MRALPWEVRNGGAQVRSVRLPIAGRREWWREWAADGTTAASPGARACALGGDRGRTCSSRVSARGCRRCWTRY
gi|348022414|gb|AGHY01002170.1|	fig|487527.6.peg.453	peg	gi|348022414|gb|AGHY01002170.1|_881_750	881	750	-	hypothetical protein				gtgcgcgacggcgacaccgcctggaacatcgccaagcgctacggcatcaccgtgcaggcgctgttgatgaagaacggcctgtccgcgcgcagcgtgctgcgccccggcatggtgctgagctacgaggactga	MRDGDTAWNIAKRYGITVQALLMKNGLSARSVLRPGMVLSYED
gi|348022416|gb|AGHY01002169.1|	fig|487527.6.peg.454	peg	gi|348022416|gb|AGHY01002169.1|_35_1042	35	1042	+	ATPase		FIG01123639	ff	gtgaccgacgacatcgcggtgctgctgcaaccgcgcctgggcaaccgccacggcctggtcgccggcgccaccggcaccggcaagaccgtgaccctgatgaccctggccgaaggcttctcgcggatcggcgtgccggtgttcctggccgacgtgaagggcgacgtggccggcctggcgatgcccggcgacggcaacgagaaggtgctgcaacgcgccagggagatcggcgtgaccgactacgccccggccgccgacccggtggtgttctgggatctgtacggcaagctcggtcatccggtgcgcaccaccgtcagcgagatgggcccgaccctgctggcgcgcgtactggaactcaacgacacccaggccggcgtgctcgacatcgtgttcaagctggcc…	MTDDIAVLLQPRLGNRHGLVAGATGTGKTVTLMTLAEGFSRIGVPVFLADVKGDVAGLAMPGDGNEKVLQRAREIGVTDYAPAADPVVFWDLYGKLGHPVRTTVSEMGPTLLARVLELNDTQAGVLDIVFKLADDRGLLLLDLDDLRALLALVVEERKDISTEYGLISAQSVAAIQRALLRLAQDGGEGFFGEPALDLAELMRVDHDGRGVIGILAAAQLVLKPRLYSTFLLWLLSELFEQLPEVGDLDKPKLVFVVDEAHLLFDDAPPALVQRIEQVVRLIRSKGVGVYFCSQFPDDVPDSILGQLGNRVQHALRALHAARPEGGAHRRRHLRR
gi|348022422|gb|AGHY01002166.1|	fig|487527.6.peg.455	peg	gi|348022422|gb|AGHY01002166.1|_232_53	232	53	-	Quinone oxidoreductase (EC 1.6.5.5)		FIG00002982	isu;Quinone_oxidoreductase_family	atggagaaggcggcgatcgcgcgcgaactggaagaacgggtgtggccgctgctggcgcagggccgcatcaaaccgcaggtggaccgctgcttcccgctgcaggaagcggcgcaggcgcatgcgttgatggagtccagtgcgcacatcggcaagatcgtgctgacgacagcagcgcagtga	MEKAAIARELEERVWPLLAQGRIKPQVDRCFPLQEAAQAHALMESSAHIGKIVLTTAAQ
gi|348022424|gb|AGHY01002165.1|	fig|487527.6.peg.456	peg	gi|348022424|gb|AGHY01002165.1|_531_289	531	289	-	Aminoglycoside 3'-phosphotransferase (EC 2.7.1.95) (Kanamycin kinase, type VIII) (Neomycin-kanamycin phosphotransferase type VIII) (APH(3')VIII)				gtgctgtgccacggcgactattcgctggacaatatcctgctcgacgcggcggaccacgtcgtcggggtgatcgatctcggccgcgccggcatcgccgatccgtaccaggacctggcgatcctggccaattgcctggacgagttcggctcggcgctcgccgaccgcttcttcgccgcgtacggcatcgccacgccggaccgcaagcggctgcagttccaccaactgctcgacgagttcttctga	MLCHGDYSLDNILLDAADHVVGVIDLGRAGIADPYQDLAILANCLDEFGSALADRFFAAYGIATPDRKRLQFHQLLDEFF
gi|348022440|gb|AGHY01002157.1|	fig|487527.6.peg.457	peg	gi|348022440|gb|AGHY01002157.1|_608_225	608	225	-	hypothetical protein				atgcgcccccggcatgcgcgctggatcgtgatcccgctgctgcttgccttgccgtcgctggcggcctgcgcctcgccgaacacgccggacagcctgcgcgtgtccagcaccaatacctacgccgcaggcacgcccgagtggcgggcaggtgcgcgactggctggcgcagcaccgtacgcgcagcgacggcgtgcgcatgggcaatctcgaccagctcggtcccatcgtcctgagctacacgcgagcgctgccgcccgccagcgagcggcttcccgcgcccgtgccactgccggccaacggcgcgaccagcgacagcatcgccattaccagttgctcagacaacgtgcgccagtcgtggcgctacggcgtcgaggcacgccctga	MRPRHARWIVIPLLLALPSLAACASPNTPDSLRVSSTNTYAAGTPEWRAGARLAGAAPYAQRRRAHGQSRPARSHRPELHASAAARQRAASRARATAGQRRDQRQHRHYQLLRQRAPVVALRRRGTP
gi|348022446|gb|AGHY01002154.1|	fig|487527.6.peg.458	peg	gi|348022446|gb|AGHY01002154.1|_7_516	7	516	+	DNA gyrase subunit A (EC 5.99.1.3)		FIG00000080	idu(1);DNA_gyrase_subunits idu(1);DNA_topoisomerases,_Type_II,_ATP-dependent idu(1);Resistance_to_fluoroquinolones	gtggtcagcctgatcgtggccgagccggccgtgggccaggacgaggacgccgacgatgtcgacgccgcggccgacatcgaggtcgaggccgacgcgcgcaatggcgacgaggccgatgcctacatcctcaccgcgaccgagaacggctacggcaagcgcaccccgctgggcgagtatccgcgcaagggccgcggcacccagggcgtgatcggcatccagaccagcgagcgcaacggcaagctggtcggtgcggtgctgttgagcacgcgcgacgaagtgctgctgatctccgacggcggcaccctggtgcgcacccgcgcctcggaaatctcccgcgtcggccgcaacacccagggcgtgaccctgatccgcctgtccaagggcgagaagctgcaggcg…	MVSLIVAEPAVGQDEDADDVDAAADIEVEADARNGDEADAYILTATENGYGKRTPLGEYPRKGRGTQGVIGIQTSERNGKLVGAVLLSTRDEVLLISDGGTLVRTRASEISRVGRNTQGVTLIRLSKGEKLQAVERLDGSLVEEDALPGEDGVAESAGEAATAAGVIRA
gi|348022448|gb|AGHY01002153.1|	fig|487527.6.peg.459	peg	gi|348022448|gb|AGHY01002153.1|_1_993	1	993	+	LigA				gtggccgaggcgatcgccttcgccgtgcacgatgtcgctgcggttgcctgcgccggcgcaggcgctgggcacggtggtgtgcaatccgccctacgacgagcggcctggccgccgacgcggcgctgtatcggcgcctgggcgatgcgctcaagcgggcggtgccgcaatggcgcgccagtctgctgtgcggcagcgacgaactggcctatgccaccggcctgcgcgcggccaagaagtaccagatgttcaacggcgcgcttggagtgcccgttgatcgtctgcgacccgatcgcggtcggcgccgcgggccggcgccagcgaggaaccgcgcgcgctcagcgacggcgcgcagatggttgccaaccgcctgcgcaagaacctgcgcaagttcaagagctg…	MAEAIAFAVHDVAAVACAGAGAGHGGVQSALRRAAWPPTRRCIGAWAMRSSGRCRNGAPVCCAAATNWPMPPACARPRSTRCSTARLECPLIVCDPIAVGAAGRRQRGTARAQRRRADGCQPPAQEPAQVQELARARAGQLLPRLRRRPARIRGGDRRVPGRRRPGAHLPTRAGIRGAGQHSRCGRAPPPQRTAGGRARSIRGARRTSGAEDPRTRQGRQQVRPFRAARRVPGGARARGAAAGEPVRLPGYRAVPRPPPAARDDGAAGARQALPQPVLLHRRGQRAGGGGRRRFHHQRGSVQHLPAVVRRQPGVQRQGRRPAPAGCRPTR
gi|348022448|gb|AGHY01002153.1|	fig|487527.6.peg.460	peg	gi|348022448|gb|AGHY01002153.1|_975_1298	975	1298	+	23S rRNA (guanine-N-2-) -methyltransferase rlmL EC 2.1.1.-)		FIG00033473	isu;RNA_methylation	gtgcaggccgacgcgctgagctggctggaggcggagaagaaccgctacgacgtgatcttctgcgacccgccgaccttctccaattccgcgcgcgccgaggatttcgacatccagcgcgagcacgtgcggctgttgcgcgcggcggtggcgcggttgatgcccgacggcgtgctgtacttctccaacaatttccgccgcttcaagctggacgagaacgcgctggccgagttcgcggtctgcgaggagatcagcgcgcagaccatcgatccggatttcgagcgcaacccgcgtatccatcgcgcctggcgcttgcagcggcgctga	MQADALSWLEAEKNRYDVIFCDPPTFSNSARAEDFDIQREHVRLLRAAVARLMPDGVLYFSNNFRRFKLDENALAEFAVCEEISAQTIDPDFERNPRIHRAWRLQRR
gi|348022454|gb|AGHY01002150.1|	fig|487527.6.peg.461	peg	gi|348022454|gb|AGHY01002150.1|_531_908	531	908	+	hypothetical protein				atgattcccgccgccgcggcatctgccgcggcaaccggtgccagcgctccacagaccgcgccccccgtcggccgcgccttccccgagacgcagaccttcgcggtgcaagtcctgggcgacctgcgccagccatcgaccgacctgcaactgatcccgggtcagctctccgaaccgctggcgctcaagggcaacggcacctaccgggtgaagatcagccccaccgacatcaccacgcgtttcgggccgatctaccggctgaccctggccgatgcgcagggaacgcccctggaggaaatgaacatcggcagcgacaccaccgccaccttcagccgttatggcgtgcaggtctacgcgctgtcgatcgaacaggcgatgtag	MIPAAAASAAATGASAPQTAPPVGRAFPETQTFAVQVLGDLRQPSTDLQLIPGQLSEPLALKGNGTYRVKISPTDITTRFGPIYRLTLADAQGTPLEEMNIGSDTTATFSRYGVQVYALSIEQAM
gi|348022456|gb|AGHY01002149.1|	fig|487527.6.peg.462	peg	gi|348022456|gb|AGHY01002149.1|_42_485	42	485	+	Xanthan biosynthesis pyruvyltransferase GumL		FIG00030978	ff	gtgtacggcgacccgggcctgctgatgccgctgttcttcccgcgcgaggcgctggcgccggcgccggcgcggcggccgttcctggtggtgccgcatttcaacgaaccggtggagaaatacgccggctacaaggatcatctggtgctgccgaaccggcagcccgccaccttcgtgcggcaactgctcggcgccgacctgatcgtgtccagttccctgcacgggctgatcctggccgaagcctacggcgtgccctcggtgtacctggactggggcaacggtgaggaccgcttcaagtacgacgattactatcacggcaccggccgcagccgctggcatgccgggcacacggtggaggaatgcgtggccctgggcggcaacacggtgttcgacctggccgcg…	MYGDPGLLMPLFFPREALAPAPARRPFLVVPHFNEPVEKYAGYKDHLVLPNRQPATFVRQLLGADLIVSSSLHGLILAEAYGVPSVYLDWGNGEDRFKYDDYYHGTGRSRWHAGHTVEECVALGGNTVFDLAAVQRGLLESFPHDLW
gi|348022458|gb|AGHY01002148.1|	fig|487527.6.peg.463	peg	gi|348022458|gb|AGHY01002148.1|_420_647	420	647	+	hypothetical protein				atgtcctccatcgtcaacctggtcgccggcggaactgggcgtgtcggtggtcccggcctccaccgcggcaggtgcagttgcccggcgtgcgctacctggacatcgaaggccgcgtaccgatggcgccgcctggcgctggccgcgctgccggccaccgcgcaggcgatgccgatcgtgcgccacctgtggcagctggcgcaggggcatgcggcgggcgggcgtgggtag	MSSIVNLVAGGTGRVGGPGLHRGRCSCPACATWTSKAAYRWRRLALAALPATAQAMPIVRHLWQLAQGHAAGGRG
gi|348022468|gb|AGHY01002143.1|	fig|487527.6.peg.464	peg	gi|348022468|gb|AGHY01002143.1|_656_318	656	318	-	hypothetical protein				gtggaaccgcgtccgaacgaggaggtcgccctggtctatcacgatggcagcggcgagcgcgcctgcgtgctgccgcgggtgcaggcgcagtcgatcctgggcgaacagttcgtcccgctcgagcagggcatgctggttggcgtccatcaggccgattgcagccgctacttcgtcgtgcgcctggccgatgccgcgtgcatcgccacgctggaagcccccgccggtctgactctgggcgtgcgcgagcaaccggggcacctgctgctgcatggggcggacggccgcctgctggacgtcgacctggcgctgtcgctggcgcatccgctgacgctgcagtga	MEPRPNEEVALVYHDGSGERACVLPRVQAQSILGEQFVPLEQGMLVGVHQADCSRYFVVRLADAACIATLEAPAGLTLGVREQPGHLLLHGADGRLLDVDLALSLAHPLTLQ
gi|348022470|gb|AGHY01002142.1|	fig|487527.6.peg.465	peg	gi|348022470|gb|AGHY01002142.1|_1051_242	1051	242	-	Inner membrane component of tripartite multidrug resistance system		FIG00005204	isu;Multidrug_Resistance,_Tripartite_Systems_Found_in_Gram_Negative_Bacteria	gtgatcctgggcccggtgatcgggccgctgctgggcggctggctcaccgagaacgtgagctggcattacgcgttcttcctcaatgtgccggtctgcgccggcctggtggcgctgctgctgctcgggttgccgcacgagcgcatgtatctgcgcggcctgctcgacgccgactggctcggcatcttcggcctcaccgccgggctgggcgccttgaccgtggtgctggaggagggccagcgcgagcgctggttcgagtccaccgagatcgtgctgctgagcgtggtctcgctggtcggcttcatcgccctggtggcctcgcaattcctcagccggcagccggtgatccgcctgtcgatcctgctgcagcgcagtttcggcgcggtgttcgtgatggtgatg…	MILGPVIGPLLGGWLTENVSWHYAFFLNVPVCAGLVALLLLGLPHERMYLRGLLDADWLGIFGLTAGLGALTVVLEEGQRERWFESTEIVLLSVVSLVGFIALVASQFLSRQPVIRLSILLQRSFGAVFVMVMAVGMILFGVMYMIPQFLAVISGYNTEQSGYVVLLSGIPTVLLMPMMPKLLTTVDVRVLVLGGLSCFAAACFVNMHLTAESVGMHFVAGQLLQGCGLALAMMSLNQAAISSVPADLAGDASGLFNAARNMGGSSGWR
gi|348022472|gb|AGHY01002141.1|	fig|487527.6.peg.466	peg	gi|348022472|gb|AGHY01002141.1|_252_689	252	689	+	FIG037127: Two-component system sensor protein				gtgctggagctgatgcagcgcgcggccgaggccaagggcctgcgcatggcgctgcaactggacccggcggtgcgcctgccggtgcgcggcgatccggtgcgcctgcgccaggtgctgagcaacctgctcggcaacgcggtcaagttcaccgcgcgcggcggcatcgacctgggcgtgcgccggctcggcgagaccccggcgcagcacctgctgcgcttcgaggtccgcgacaccggcatcggcatcagcgccgagcgccaggagcaacctgttccaggccttcacccaggccgatgcctccaccacccgcctgtacggcggcaccgggctgggcctgaccatctgcaagcgcatcgtcgaactgatgggcggacgcatcggcgtggcgtcgccggctgg…	MLELMQRAAEAKGLRMALQLDPAVRLPVRGDPVRLRQVLSNLLGNAVKFTARGGIDLGVRRLGETPAQHLLRFEVRDTGIGISAERQEQPVPGLHPGRCLHHPPVRRHRAGPDHLQAHRRTDGRTHRRGVAGWARAPRSGSRSRC
gi|348022474|gb|AGHY01002140.1|	fig|487527.6.peg.467	peg	gi|348022474|gb|AGHY01002140.1|_231_94	231	94	-	hypothetical protein				ttgccgcacgaccttcaaggctgcgccggcggagaagaagtaacggcgtggggcagggcgctgcctaggcggcgcccgcgttgggagtggggtagagaacggcacggccggtcgtcacgctccatgggccgtggatag	MPHDLQGCAGGEEVTAWGRALPRRRPRWEWGRERHGRSSRSMGRG
gi|348022474|gb|AGHY01002140.1|	fig|487527.6.peg.468	peg	gi|348022474|gb|AGHY01002140.1|_467_189	467	189	-	FIG01211650: hypothetical protein		FIG01211648	ff	gtgttgctggcgatcgtggtggtgctgctggcctgggtcggctatgcctggtacaccggcatcgccatcacccaaggcatcgaagagcgcgacatggactggaacggcgacggccaggtcacccgcgacgagatctggcagtcgttctacgcggtcggcgtcagccgcacccagaacggcccgcgcgagtgcagcacgttctactggcgcagcaccggcgcgcagatccgcgtggattgccgcacgaccttcaaggctgcgccggcggagaagaagtaa	MLLAIVVVLLAWVGYAWYTGIAITQGIEERDMDWNGDGQVTRDEIWQSFYAVGVSRTQNGPRECSTFYWRSTGAQIRVDCRTTFKAAPAEKK
gi|348022474|gb|AGHY01002140.1|	fig|487527.6.peg.469	peg	gi|348022474|gb|AGHY01002140.1|_1736_501	1736	501	-	UDP-N-acetylglucosamine 1-carboxyvinyltransferase (EC 2.5.1.7)		FIG00034392	isu;UDP-N-acetylmuramate_from_Fructose-6-phosphate_Biosynthesis	gtgaaggggaacatttccggcgccaagaacgccgtgctgccgatcctctgcgcgaccctgctggccgatgcgccggtggagatcaccaacgtgccgcaactgcacgacgtgatcaccacggtgaagctgctcggcgagctgggcgcggaagtcaccatcgacgaaggcacgctctcgcgcggcagcgcgatcaccgtcgacccgcgcaaggtccaccagcacgtcgccccgtacgaactggtgcgcaccatgcgcgcctcgatcctggtgctgggcccgctgctggccaagttcggcgcggccgaagtgtcgctgccgggcggctgcgcgatcggttcgcgcccggtcgaccagcacatcaagggcctgcaggcgctgggcgcggagatcagcgtcgag…	MKGNISGAKNAVLPILCATLLADAPVEITNVPQLHDVITTVKLLGELGAEVTIDEGTLSRGSAITVDPRKVHQHVAPYELVRTMRASILVLGPLLAKFGAAEVSLPGGCAIGSRPVDQHIKGLQALGAEISVENGYIKASSNGRLKGGRYVFDMVSVTGTENVLMAAALADGTTVLENAAMEPEVSDLADCLIALGAKIEGAGTSRIVVHGVARLSGGRHAVLPDRIETGTFWVAAAMTGGSVTVRRARADTLDAVLDKLTEAGASIETGEDWIRLDMHGKRPRAVSLTTAPYPAFPTDMQAQFMALNCVADGVGVINETIFENRFMHVNELLRLGADIQIEGHTAIVRGSERLSGAPVMATDLRASASLILAGLVADGDTTIDRIYHLDRGYENIEEK…
gi|348022476|gb|AGHY01002139.1|	fig|487527.6.peg.470	peg	gi|348022476|gb|AGHY01002139.1|_866_468	866	468	-	hypothetical protein				atgagcggcatggaaggcgttcagccgcggcagcagccacccgaccgcgaaggtgccgaccacgcccacgctcagcgtctcgcgatagcgaccgccagcgaagcgctgcagggtggaggcgatgcggtcgaaggcctcggtcagcactggatgcaggcgcaggccctcgtcggtcagggccacgccgcgcggcagacgctggaacaggagcacgcccaggcgtgcctccaggtgcttgatctggtggctcagcgcggcctgggtcacgcacaactcggcggcggcacgggtcaggttctggtgccgcgccgcggcctcgaaggcgcgcagggcgttcagcggcaggtgcgggcgggtcatcgccaggtatcaattcggctcatgggtgcgattgaataa	MSGMEGVQPRQQPPDREGADHAHAQRLAIATASEALQGGGDAVEGLGQHWMQAQALVGQGHAARQTLEQEHAQACLQVLDLVAQRGLGHAQLGGGTGQVLVPRRGLEGAQGVQRQVRAGHRQVSIRLMGAIE
gi|348022480|gb|AGHY01002137.1|	fig|487527.6.peg.471	peg	gi|348022480|gb|AGHY01002137.1|_720_34	720	34	-	FIG01210820: hypothetical protein		FIG01210819	ff	atgcagaccacttccagcgacggcggccaccactggtccacgcccgagcacctgcccgccggcatcctcggtccgatcaagaacaagccggtgcagttgcccagcgggcgcatcctcagccccagcagcagcgaggacgcgggctgggtcgcgcacatggaatggtccgacgacaacggcgcgcactggacccgcggcccggcgatgaacgacccggccaggatcggcgccatccagcccagcgtgctgctgcacaaggacggccgcctgcaggcggtgggccgcagccagcagaaccacgtgttcagcacctggtcgcgcgaccagggccgcacctgggaaccgatgaccctactcgacctggccaatcccaattccggcaccgacgcggtggtcctg…	MQTTSSDGGHHWSTPEHLPAGILGPIKNKPVQLPSGRILSPSSSEDAGWVAHMEWSDDNGAHWTRGPAMNDPARIGAIQPSVLLHKDGRLQAVGRSQQNHVFSTWSRDQGRTWEPMTLLDLANPNSGTDAVVLADGRSLLVYNPTEAGKDWWDGRGILAVALSDDGLHWTRVLTLEDSPKDEFSYPAVIQTRDGKVHISYTWKRTRIKHVVLDPKRLGVESAAPAGGR
gi|348022482|gb|AGHY01002136.1|	fig|487527.6.peg.472	peg	gi|348022482|gb|AGHY01002136.1|_222_443	222	443	+	FrmR: Negative transcriptional regulator of formaldehyde detoxification operon			isu;Glutathione-dependent_pathway_of_formaldehyde_detoxification	gtggccagaccgaagcactggagcgcgcgctcgaaggcggcgccgagtgcggcggcggtgctgcagcagatcgccgccatccgcggtgcggtcaatggcctcatgtccgaggtgatggaagcccacgtccgcgaagaattcggccagccggccagctccgacgcgcagcgcgccgcgcgcgtgcgcgagatgggcatgctggtccgctcctatctcaagtga	MARPKHWSARSKAAPSAAAVLQQIAAIRGAVNGLMSEVMEAHVREEFGQPASSDAQRAARVREMGMLVRSYLK
gi|348022484|gb|AGHY01002135.1|	fig|487527.6.peg.473	peg	gi|348022484|gb|AGHY01002135.1|_124_1032	124	1032	+	Flavodoxin reductases (ferredoxin-NADPH reductases) family 1; Vanillate O-demethylase oxidoreductase (EC 1.14.13.-)		FIG00001276	isu;Anaerobic_respiratory_reductases isu;Anaerobic_respiratory_reductases	gtgctcgatccgggcagcgccagccgccccttcaccgtgggcagccatctcgacgtgcgcgtgcgcatcggtgacgcctggcacgagcgctcctattcgctggtcggcgagcctgccgccgatggccactaccgcatcgccgtgcgcgcggtgccagacagccgcggcggttcgcgcgcgatgtgggcgctagcgccgggtgcgcaattggagatctcctcgcccaacaaccatttcgccctggacgagaccgccgagcacatcgtgctggtcgccggcggcatcggcatcaccccgatcctgggcatggcgcaacggctggcgcgcgggcgcatcccgttccaactgctctacgccggccgcagccgcgccagcatggcctacctggagcatctgcag…	MLDPGSASRPFTVGSHLDVRVRIGDAWHERSYSLVGEPAADGHYRIAVRAVPDSRGGSRAMWALAPGAQLEISSPNNHFALDETAEHIVLVAGGIGITPILGMAQRLARGRIPFQLLYAGRSRASMAYLEHLQELLGERLQLFCPEHLGQLELAAQIAQWPRNADVYACGPLPLLHELRQRWRDDGRARARLHFETFGNSGNAPAQPFVVQVPALGKTVQVAENESLLDALSAAGVEVMADCRRGECGLCVVEVLEAAAPLDHRDVFLSDEQRHSNRKLCACVSRALGGSLSIDTGYRADAF
gi|348022484|gb|AGHY01002135.1|	fig|487527.6.peg.474	peg	gi|348022484|gb|AGHY01002135.1|_1295_1122	1295	1122	-	FIG01210342: hypothetical protein		FIG01210341	ff	gtgcagttgccgctggtggcgatcctggccgagggcgactacgtgaccctggtgtcggtgcgcacgctgcccgatcccaaggacgccagcaagacctacaccaccacctggttcgacatgttccgcatccagaacggcaagatccaggagcattgggacgcggcgaccaagtga	MQLPLVAILAEGDYVTLVSVRTLPDPKDASKTYTTTWFDMFRIQNGKIQEHWDAATK
gi|348022490|gb|AGHY01002132.1|	fig|487527.6.peg.475	peg	gi|348022490|gb|AGHY01002132.1|_33_227	33	227	+	hypothetical protein				gtgatggtcgtgaccgtgcgcgtgatcgtggtcatgcccagcgtggtgcgcgtgcgcatggtcgtcatgccggtgcctggcattgggcatggccgtgttcgtgatgatggccgtgactatggccatgcccatgcccgtgcccgtgcccatgcccgtgatcatgatggtggtcggcgcccagcatccaggcgctga	MMVVTVRVIVVMPSVVRVRMVVMPVPGIGHGRVRDDGRDYGHAHARARAHARDHDGGRRPASRR
gi|348022490|gb|AGHY01002132.1|	fig|487527.6.peg.476	peg	gi|348022490|gb|AGHY01002132.1|_661_191	661	191	-	Cobalt-zinc-cadmium resistance protein CzcD		FIG00000503	idu(1);CBSS-36873.1.peg.4752 idu(1);Cobalt-zinc-cadmium_resistance	atgagccaccacgacaccctggatgcgttcacccatcagcacgatttcctcggcacgcgccacgagcgcaatgcgcgccgcacctggtcggtggtggcgctgaccgccgcgatgatgctcgtggagatcgtcgccggctggtggaccggctcgatggcgctgctggccgacggtctgcacatggccacccacgccggcgcgctgtcgctggccggctttcgcctactggttcgcgcggcggcaccggcacaatccgcgtttcaccttcggcaccggcaaggtcggcgacctggcgggcttttccagcgcgctgatcctggcgctgatcgcgctgggcatcggcgtggagtcggcgctgcgcctggcgcagccggtccatatcgcctacgacgaggccct…	MSHHDTLDAFTHQHDFLGTRHERNARRTWSVVALTAAMMLVEIVAGWWTGSMALLADGLHMATHAGALSLAGFRLLVRAAAPAQSAFHLRHRQGRRPGGLFQRADPGADRAGHRRGVGAAPGAAGPYRLRRGPVDRGAGPAGEPAQRLDAGRRPPS
gi|348022492|gb|AGHY01002131.1|	fig|487527.6.peg.477	peg	gi|348022492|gb|AGHY01002131.1|_37_183	37	183	+	hypothetical protein				gtgcaggcaccgcagagctacgacccgtgggagaagtacaaccgcaaggtgcatgccttcaacaacgtgggtcgatcgcgcggtggcgcggccgctggcccgcgcctacgtcaacgtggtgccgcggccggtgcggctggggcgtga	MQAPQSYDPWEKYNRKVHAFNNVGRSRGGAAAGPRLRQRGAAAGAAGA
gi|348022500|gb|AGHY01002127.1|	fig|487527.6.peg.478	peg	gi|348022500|gb|AGHY01002127.1|_182_51	182	51	-	FIG005069: Hypothetical protein		FIG00005069	ff	atgttcgccttcctgtaccgcgtcaccggcattccctacaccgaacagcaggccctgcgctcgcgtgggcgcgactacgccgactaccagcgcagcaccagcgccttcttccccatgccgccgcggcactga	MFAFLYRVTGIPYTEQQALRSRGRDYADYQRSTSAFFPMPPRH
gi|348022504|gb|AGHY01002125.1|	fig|487527.6.peg.479	peg	gi|348022504|gb|AGHY01002125.1|_69_266	69	266	+	Cysteinyl-tRNA synthetase (EC 6.1.1.16)		FIG00000086	idu(1);tRNA_aminoacylation,_Cys idu(1);Conserved_gene_cluster_possibly_involved_in_RNA_metabolism idu(1);At2g23840	ttgcagcaggatccgcaggtctggttccagggcgccggcagcgacgacgacgcccacatccaggcgctgatcgacgcccgcagcgacgccaagaaggcccgcgacttcgcccgcgccgacgccatccgccaggaactggccgaggccggcattgtcttggaggacacgccgcaaggcgtacgctggaagcgcgggtga	MQQDPQVWFQGAGSDDDAHIQALIDARSDAKKARDFARADAIRQELAEAGIVLEDTPQGVRWKRG
gi|348022506|gb|AGHY01002124.1|	fig|487527.6.peg.480	peg	gi|348022506|gb|AGHY01002124.1|_309_40	309	40	-	hypothetical protein				gtgagccaggcggtggccgacgcgccggacaggcgctatcacggctactgcttctaccatggccaggacatggagcgcgccatcgatggcgccgggctgatgctggcgttcggcgatctggacgggcgcgaggacacagatctggcggtcggccaacaggtcgccgcagcgttgcgtgcggcgggcttcaccgtggactgggatggcacgccgcgcaagcgcatcgatctgcccggcttcgtctggcagcgacgcgccgattgggattga	MSQAVADAPDRRYHGYCFYHGQDMERAIDGAGLMLAFGDLDGREDTDLAVGQQVAAALRAAGFTVDWDGTPRKRIDLPGFVWQRRADWD
gi|348022508|gb|AGHY01002123.1|	fig|487527.6.peg.481	peg	gi|348022508|gb|AGHY01002123.1|_191_9	191	9	-	hypothetical protein				gtggaacgcgcagctgagccaggtactcagcgaagggaccagcggcaagctcagcgcgtcgctggcggttcaacaacctgttcgatcgcaagtactggtaccgcggcactcgacaccagcccctggggccggcagccggcgccgggccgcagcgtcaccgtcggtctcgagtacacgttctga	MERAAEPGTQRRDQRQAQRVAGGSTTCSIASTGTAALDTSPWGRQPAPGRSVTVGLEYTF
gi|348022510|gb|AGHY01002122.1|	fig|487527.6.peg.482	peg	gi|348022510|gb|AGHY01002122.1|_76_417	76	417	+	Phosphopantetheine adenylyltransferase (EC 2.7.7.3)		FIG00000261	isu;CBSS-266117.6.peg.1260 isu;Coenzyme_A_Biosynthesis	gtgtcgctggcccgcgaggccctggccgggcaccgcaacgtggaagtgctgggcttcgataccctgctggcgcatttcgtgcggtcggtcggcggcggcgtgctgctgcgcggcctgcgcgcggtgtccgatttcgaatacgagttccagatggcgagcatgaaccggcatctgatcccggaggtggagacgctgttcctcaccccggccgagcaacacagcttcatttcgtcctcgttggtgcgcgagatcgcgcgcctgggcggggacgtctccggcttcgtgccgctgtcggtggtgcaggcgctggtccaggcccgccaggccgccgcgcagcgctga	MSLAREALAGHRNVEVLGFDTLLAHFVRSVGGGVLLRGLRAVSDFEYEFQMASMNRHLIPEVETLFLTPAEQHSFISSSLVREIARLGGDVSGFVPLSVVQALVQARQAAAQR
gi|348022510|gb|AGHY01002122.1|	fig|487527.6.peg.483	peg	gi|348022510|gb|AGHY01002122.1|_633_430	633	430	-	hypothetical protein				atgttctggatcgccacttcctgcaggtacttcttccagccggcgtcgtcgtccttggccggggcggtcagcgcgggctgcgcgtcggcggccggcttggcggcctcttccttcttgcaggcggtgaagcccagggccagcgaagcgatcagcaacgcgcgtgcggtggtgttcatggaacggctccctctgtgtcgtcagtga	MFWIATSCRYFFQPASSSLAGAVSAGCASAAGLAASSFLQAVKPRASEAISNARAVVFMERLPLCRQ
gi|348022512|gb|AGHY01002121.1|	fig|487527.6.peg.484	peg	gi|348022512|gb|AGHY01002121.1|_1459_749	1459	749	-	tRNA pseudouridine synthase A (EC 4.2.1.70)		FIG00000093	idu(1);RNA_pseudouridine_syntheses	gtgggcgagggcgacgaggtcaaggtcgatgggcagccgctgcgcgcgcgcgccaaggccaggagcgggcgccgccacgtctacatcgcgctgaacaagccggtcggagtgacctgtaccaccgagagcgcggtcaagggcaacatcgtcgacttcgtcggccacgagcagcgcatcttcccgatcgggcgcctggacaaggagtccgaggggctgatcctgatgaccagcaacggcgacatcgtcaacgagatcctgcgcgcggagaaccgccaccagaaggagtacctggtggcggtgaacaagccggtcaccgacgagttcctgcgcggcatggcgcgcggcgtgcgcgtgcacgaccagatgaccctgccgtgccgcaccgccgcgcatcgccaa…	MGEGDEVKVDGQPLRARAKARSGRRHVYIALNKPVGVTCTTESAVKGNIVDFVGHEQRIFPIGRLDKESEGLILMTSNGDIVNEILRAENRHQKEYLVAVNKPVTDEFLRGMARGVRVHDQMTLPCRTAAHRQVRLPHRAGARAQPADPVDGGGVRLPCHPVAPRAHRQHQARRSEAGPVAQSYRAGTARPAAAAPGVVTASQCPRPAAAAPARAGVRHGFGHTAQREPTPPLGTP
gi|348022516|gb|AGHY01002119.1|	fig|487527.6.peg.485	peg	gi|348022516|gb|AGHY01002119.1|_253_74	253	74	-	Alkylated DNA repair protein AlkB		FIG00001574	idu(1);DNA_repair,_bacterial	gtgctgcgccatcgccagcaggcggcgctgcgccagatgctggaactgacttccggcgggctgctgctgatggcgggcgagacccagcgcctgtaccggcacgccctgccgcgcaccgccaggccggtcggcgagcggatcaacctgacgtttcggcgtatagctacgatggagggttag	MLRHRQQAALRQMLELTSGGLLLMAGETQRLYRHALPRTARPVGERINLTFRRIATMEG
gi|348022518|gb|AGHY01002118.1|	fig|487527.6.peg.486	peg	gi|348022518|gb|AGHY01002118.1|_81_839	81	839	+	Carbon-nitrogen hydrolase		FIG00715098	ff	gtgctgcccgagtatctgtcgctggaactggccgcgaccttcggcgccgaggtgtcggcgcggctgccggcctcgctggccgcgatccaggcattgcatgcgccgtacatgaggttgtttgccgacctggcgcggcgcctccgcctgcacgtggttgccggcagtttcctgctcgaccacgggcagggccgctaccgcaatcgcgcctactggttcaccccggacggcggccacggctggcaggacaagctgcaactgaccgggttcgaaaaggccacagggctgatcgacggcggcgaggcgctgaaggtgttcgaggccgagagcgtgcgcgccggcgtggcggtctgctacgacagcgaggtttccgctgccggttcgcgcccagtacgaggccgg…	MLPEYLSLELAATFGAEVSARLPASLAAIQALHAPYMRLFADLARRLRLHVVAGSFLLDHGQGRYRNRAYWFTPDGGHGWQDKLQLTGFEKATGLIDGGEALKVFEAESVRAGVAVCYDSEVSAAGSRPVRGRRAPAGGAQLHRHRGRRHPRARGLLGAGAGEPHLRRPVGDRRRRRVEPGAGREHRRGDAVRADGRRVSPPTASSRRPAASRSGRSPNWISPRSRPAAPPPRWPTTATGAGNWRQPCSARS
gi|348022520|gb|AGHY01002117.1|	fig|487527.6.peg.487	peg	gi|348022520|gb|AGHY01002117.1|_131_769	131	769	+	hypothetical protein				atgctgcccggcatcggctggatcctgggcatcgtcaccaccctggcgatctacaagtacgccttcgagatcctgcggcacactgccgacggctacctggacgcgccggaacgcggtttcgatgtgggcgacggcgtggtgctgcggctgctggcgatgatgatcctgctcggcgtggcggtgttcgctgcgctgctgctggccggcccggtcggtggcctgctgatgctgctggcggtggtgctgctgcagccgggcatcctgatttccctggcgatggacggcagcctgcgccgcgcgctgaacccggccgtgtcgatcggcctggcgctgcgcatcggctggccgtacctggctgcgttcggcctgctgttcgtgatccaggccagcgcactgagc…	MLPGIGWILGIVTTLAIYKYAFEILRHTADGYLDAPERGFDVGDGVVLRLLAMMILLGVAVFAALLLAGPVGGLLMLLAVVLLQPGILISLAMDGSLRRALNPAVSIGLALRIGWPYLAAFGLLFVIQASALSAAAWLQRALPPLVADLAVTVVTIWGLFAALPPAGLSGLPVSRRAGLRTGCRGGQRLRPPRPGPARARRGRAVGARRPHR
gi|348022522|gb|AGHY01002116.1|	fig|487527.6.peg.488	peg	gi|348022522|gb|AGHY01002116.1|_2302_2430	2302	2430	+	hypothetical protein				ttgaactgtcgcggtctcctcatcttccgcaaggctgggcgagcgggactggtgttcgtcgaaggtagcgggttcgcctgggagaaggacgactggcgcgacttggatatggaagacgatgaagcgtag	MNCRGLLIFRKAGRAGLVFVEGSGFAWEKDDWRDLDMEDDEA
gi|348022522|gb|AGHY01002116.1|	fig|487527.6.peg.489	peg	gi|348022522|gb|AGHY01002116.1|_2952_2566	2952	2566	-	Single-stranded DNA-binding protein		FIG00077620	isu;DNA_repair,_bacterial_RecFOR_pathway isu;DNA_repair,_bacterial	atgagcacccacttcttcggcgagggcaacgtcggctcggcgcccgagttcgacgaatacccgaacggcaacgacgaaccccggcgcgtccttcgcctgaacgtgtacttcgataatcctgtaccaggcaaagacgacacctacgacgatcgcggcggcttctgggcccccgtcgactggtggcatcgcgatgcggagcactgggcgacactcttcgccaagggcatgcgcgtgatggttcgtggtcgcctggaacgcgacccctggacggacagcgagggaaagtcgcatacgacctacaaggtcaacgcgcgttcggtcgccatcctgccctaccggctggatgcagtcgagctcagccccaagccggcggccaccagcgattga	MSTHFFGEGNVGSAPEFDEYPNGNDEPRRVLRLNVYFDNPVPGKDDTYDDRGGFWAPVDWWHRDAEHWATLFAKGMRVMVRGRLERDPWTDSEGKSHTTYKVNARSVAILPYRLDAVELSPKPAATSD
gi|348022522|gb|AGHY01002116.1|	fig|487527.6.peg.490	peg	gi|348022522|gb|AGHY01002116.1|_3436_3065	3436	3065	-	Integrase regulator R		FIG00052896	ff	atggcgcagcggcgcgtgctggcgcaggcgaaccagtacccgtacctgttgctgcccatccatctggcccagcaggcgactggcgcagggacgagcttcctgcgctggcgcaggcacgaccgctccgcgatgggtgtggcgctgtgggaagagatgatggccagcaccgcgacgccggaaggcttgatcgacgatctgcacgccatggaggcgcagcgggtggtgctcaacatgcaggtgagcctgctgcacaccctggggcggcaggcaatggactgcgccagcaagatcgctagcgccgaggcggcgtacctgcgccggagggcaccgagacacgaagacacccaacccagtcaggagcgtacgccatga	MAQRRVLAQANQYPYLLLPIHLAQQATGAGTSFLRWRRHDRSAMGVALWEEMMASTATPEGLIDDLHAMEAQRVVLNMQVSLLHTLGRQAMDCASKIASAEAAYLRRRAPRHEDTQPSQERTP
gi|348022524|gb|AGHY01002115.1|	fig|487527.6.peg.491	peg	gi|348022524|gb|AGHY01002115.1|_626_30	626	30	-	ferric enterobactin receptor		FIG01210973	ff	gtgcagcgcttcggcatcgccggcctgcagagcgccagcttcttcgtcaacgccgccgacacccgcacccgcggcgccgagctggtcagcaactggcggcaggcgctgggcgatggccaactgcagttgaccggcacctggagctacgccaagaccgaactggagaacgtggtggccacgccggcgcaactgctggcgctgaatccggactacgtgctgttcggcgtggaagagcgcaacaccctgaccgaagcgacgccgcgcacgcgcgcgcaactggcggcgaactggagcgatgcgcactggtcgctgcagacccgcgtcacccgctacggcagcgccacccgcgtgttcgacttcggcggcggcttcgacccggagcagacctacagcgccaag…	MQRFGIAGLQSASFFVNAADTRTRGAELVSNWRQALGDGQLQLTGTWSYAKTELENVVATPAQLLALNPDYVLFGVEERNTLTEATPRTRAQLAANWSDAHWSLQTRVTRYGSATRVFDFGGGFDPEQTYSAKWQLDAEVEYHLTPQWSVAVGGQNLTDAYADRSKPDIAYYGNLPYDVLSPIGSNGAYYYGRVRYTF
gi|348022524|gb|AGHY01002115.1|	fig|487527.6.peg.492	peg	gi|348022524|gb|AGHY01002115.1|_1108_638	1108	638	-	ferric enterobactin receptor		FIG01210973	ff	atgcggccggacctgtcgcgcaacgtcgccagcgtctacgccagcgtgtccagccagttcggggacaagctctccaccgacctggccgcgcgctacgagcactaccaggacttcggcgggcgaactgaccggcaagctggccgcgcgctacgagttcgtcccggcgttcgccctgcgcggcgcgatctccaacaacttccgcgcgccgtcgctgagccagatcggctacgaagccagctccaccggctaacaacgccaacggccagctgctgcagggccgcctgctctcggtcgacaacccgatcgcgcaggcgctgggcgcccgcacgctgcaaccggagaagtcgcgcaactacagcctgggcttcaccagccgcgtcggcagccacttcgacctgt…	MRPDLSRNVASVYASVSSQFGDKLSTDLAARYEHYQDFGGRTDRQAGRALRVRPGVRPARRDLQQLPRAVAEPDRLRSQLHRLTTPTASCCRAACSRSTTRSRRRWAPARCNRRSRATTAWASPAASAATSTCRWTCSRSTSTSASRCRKASTATP
gi|348022526|gb|AGHY01002114.1|	fig|487527.6.peg.493	peg	gi|348022526|gb|AGHY01002114.1|_785_621	785	621	-	3-deoxy-D-manno-octulosonic-acid transferase (EC 2.-.-.-)		FIG00000616	isu;COG0451 isu;LOS_core_oligosaccharide_biosynthesis	gtgcgccagtacttccagcgctgggacgagcgctacgcctcgtattcgcaggcgcgcgggcgcccgcgggtgtggctgcacgcggtctcggtgggcgaggtcaaccgtcgccgcgccggtggtcaacgcgctgcgcgcgcagcgccccggacatccgctgggtga	MRQYFQRWDERYASYSQARGRPRVWLHAVSVGEVNRRRAGGQRAARAAPRTSAG
gi|348022528|gb|AGHY01002113.1|	fig|487527.6.peg.494	peg	gi|348022528|gb|AGHY01002113.1|_56_1015	56	1015	+	hypothetical protein				gtggcgctggcattgggtaccgggctgtactactgggccaatgcggcggggatcggcattcccggtcaccaggcgccgcagtggatcgcgccgcaattggtgctgccgtggccgagcctgggcttcgtcgccggcttggccgacacggtgccgctgctgccgctgctgctgccgttcggcctgctgatggtggtgggcggcatcaacgtcagcgaaagcgcgcgcgccgccggcgacgactaccgcacccgcgacatcctgctggtcgaggccggcgcgaccctgatcgccggcgtctgcggcggcgtcgcccagaccacgccctacatcggccagccggcctacaagcacatgggctcgcgcagcggctacaccctgctcaccgggctgttcatcggc…	MALALGTGLYYWANAAGIGIPGHQAPQWIAPQLVLPWPSLGFVAGLADTVPLLPLLLPFGLLMVVGGINVSESARAAGDDYRTRDILLVEAGATLIAGVCGGVAQTTPYIGQPAYKHMGSRSGYTLLTGLFIGLGGMLGLVAGLVQWLPMAVLAPIIVYVAIDITTQAFQATPKRHAGAMVLGFLPSVAYLLAIKAPGWIAPDQLAKLTTTLDGHGLPELAVILTLGNGFIITAMLWIATVAAMVDGRLRRAAAFLLVAAGLTLFGLIHSVDPRGGLYLPWTLSGVPKLIAWQFVGGYLVLAALLGLLSLQKPRAVLVE
gi|348022530|gb|AGHY01002112.1|	fig|487527.6.peg.495	peg	gi|348022530|gb|AGHY01002112.1|_42_602	42	602	+	virulence protein				gtgttcgcgatcttcgtctccggcgacggcggctgggccgggctcgaccagcaggtcgccggcgccctggccaaggccggcatcccggtggtgggcgtggattcgctgcgctacttctggagcgagcgcacgccgcagggcttcgccaccgacctggaccgcatctaccggcactacagccacctgtggcagcgcgggcgggtagtgctgatcggcttctcgcagggcgccgacgtgttgccggcggcctacaaccagttgccggaagcgatgcgcgatcaggtgcagatgaccgccctgctgtcggtgggcaagaccgcggactacgagttccacgtgtccaactggatcagctccggcgacgacggcctgccgatcgccccggaagtggcgaagatg…	MFAIFVSGDGGWAGLDQQVAGALAKAGIPVVGVDSLRYFWSERTPQGFATDLDRIYRHYSHLWQRGRVVLIGFSQGADVLPAAYNQLPEAMRDQVQMTALLSVGKTADYEFHVSNWISSGDDGLPIAPEVAKMPPAQTLCIYGEDDDDALCPDLPKGGAQLVKLPGDHHFQGDYATLAKQILQRIQ
gi|348022532|gb|AGHY01002111.1|	fig|487527.6.peg.496	peg	gi|348022532|gb|AGHY01002111.1|_1008_25	1008	25	-	Excinuclease ABC subunit A paralog of unknown function		FIG00133034	idu(1);DNA_repair,_UvrABC_system	gtgtccggctcgggcaagtcctcgctggtcagccaggcgctggtggagttgctgggcacgcaactggggcaggcgccggccgaggcggaagaggaactggatccgctggagcgcggtgcgcgcgtcgccaccgacggctacatcgccgacggcctgcagcacgtgcggcggctggtgcaggtggaccaggcgccgatcgggcgcacgccgcgctccaacctggcgacctacaccggcctgttcgatcacgtgcgcaagcgcttcgcggccacgcccgcggcgcgcaagcgcaaatacgacgccgggcgtttttccttcaacgtggccaagggccgttgcgaaacgtgcgaaggcgagggcgcggtgagcgtggaactgctgttcatgcccagcgtgtat…	MSGSGKSSLVSQALVELLGTQLGQAPAEAEEELDPLERGARVATDGYIADGLQHVRRLVQVDQAPIGRTPRSNLATYTGLFDHVRKRFAATPAARKRKYDAGRFSFNVAKGRCETCEGEGAVSVELLFMPSVYAPCPTCQGARYNAKTLEIELHGRNIAQVLRMTVAEALDFFADDVPIARPLQVLVEVGLGYLRLGQPATELSGGEAQRIKLATELQRAQRRGTVYVLDEPTTGLHPADVDTLLRQLHGLVEAGNTVVAVEHDMRVAAVSDWIIDMGPGAGGAGGKGGGGRCAAGGGKGGGQPHGAVSGGGIGGVIGCGIERASLV
gi|348022542|gb|AGHY01002106.1|	fig|487527.6.peg.497	peg	gi|348022542|gb|AGHY01002106.1|_82_204	82	204	+	hypothetical protein				gtgcgctgcttcgacgtcggcaccacgccggaaggccgggccgatgaaggcgctggcggtgtccaccgcgggcgcgctgggatcccgcggctgcacaggcgcgcaagctgccggtggtgctga	MRCFDVGTTPEGRADEGAGGVHRGRAGIPRLHRRASCRWC
gi|348022544|gb|AGHY01002105.1|	fig|487527.6.peg.498	peg	gi|348022544|gb|AGHY01002105.1|_231_776	231	776	+	Alpha-2-macroglobulin			ff	gtgcacttcgtgccgcagggccagccgccgctgtacgccagcctggaaatcgccggcgtgccgcgcaccccgccggcggcggacgacagcacgctgaaggtggagcgcagcttctacggcaccgacggcaagccgtggacgccgcggccgttgaaggagggcgaggcgctgatcgtgcgcgtcaccatcacctccgataccagcatgcccgacgcgctgttgaccgacctgctgccggccggcctggagatcgagaacttcaacctgggcgacgccaagcagtgggcggacgtggtggtggacggcatcgagatcagcgaccgctccaacgccgccgacgtcaagcacgaggagttccgcgacgaccgctacgtggccgcgctgagcctgtcggcgggc…	MHFVPQGQPPLYASLEIAGVPRTPPAADDSTLKVERSFYGTDGKPWTPRPLKEGEALIVRVTITSDTSMPDALLTDLLPAGLEIENFNLGDAKQWADVVVDGIEISDRSNAADVKHEEFRDDRYVAALSLSAGSKAQVFYLVRAVTPGTYTVPPSLVEDMYRPDLRGVGRSNPGTINVVQP
gi|348022546|gb|AGHY01002104.1|	fig|487527.6.peg.499	peg	gi|348022546|gb|AGHY01002104.1|_830_168	830	168	-	Acriflavin resistance protein		FIG00007059	idu(10);Multidrug_Resistance_Efflux_Pumps	atgggcttcaccctcaaccgcgtgtctttgtttgcgctgatcttctcgatcggcatcctggtcgacgacgccatcgtggtcgtggagaacatccaccgccatctgcgcgccggcggcaagaccttgcgcgaggcgattccggcggcggtggacgaggtcggtggcccgaccatcctcgccaccttgaccgtgatcgcggcgctgatgccgatggccttcgtcagcggcctgatgggaccgtacatgcggccgatcccgatcaacgcctcggtcggcatgctgctgtcgctggcgatcgcgctggtggtgacgccgttggctggcgttgaagctgttgaagcggcatgtgccggcgcatgccgcgcaggcccatgccggtggcgacgcgccgccgcgcct…	MGFTLNRVSLFALIFSIGILVDDAIVVVENIHRHLRAGGKTLREAIPAAVDEVGGPTILATLTVIAALMPMAFVSGLMGPYMRPIPINASVGMLLSLAIALVVTPLAGVEAVEAACAGACRAGPCRWRRAAAPAAAVRAVAAPVPGSGPRRTPPWLAVRRHRGVAAGRSGPGRAAMGGAEDAAVRRQVRTADRGRSARRQHPAGHRRAVGGTSRGARPHV
gi|348022550|gb|AGHY01002102.1|	fig|487527.6.peg.500	peg	gi|348022550|gb|AGHY01002102.1|_980_216	980	216	-	tRNA pseudouridine synthase C (EC 4.2.1.70)		FIG01305188	isu;RNA_pseudouridine_syntheses	gtggcgcgccggtgcggcacggataatctgcaggtgaataccgccgaacctcctttgcagatcctgtaccaggacgcgctgctggccgtggtcgacaagcctgccgggctgatggtccacgacagcaagctcgcccgcggcgaggacgatttcctcgccgaccgcctgcgtgcgcagctgggccggccgatcttcctggtgcaccggctggcccgtgccaccagcggttgcctgctgctggccttcgaccgcgacaccgccagtacgctgggcaaggcgctgatgggcggcgaagtggacaaggattatctggcgatctgccgcggctggccggccgaggagcacttcgacgtcgaccacgatctcgacggcggccccggcaagccgctgaagaaaccg…	MARRCGTDNLQVNTAEPPLQILYQDALLAVVDKPAGLMVHDSKLARGEDDFLADRLRAQLGRPIFLVHRLARATSGCLLLAFDRDTASTLGKALMGGEVDKDYLAICRGWPAEEHFDVDHDLDGGPGKPLKKPAQTRFARLTCGELPVPSGEFATSRYALLRCSPVTGRFRQIRRHLKHISHHLIGDTSHGDGRHNRFFRMQGVHRMLLHAERLAFPHPDGHRIAVTAPLDAAFVRAFGLFGWDPAPWQVDAGG
gi|348022558|gb|AGHY01002098.1|	fig|487527.6.peg.501	peg	gi|348022558|gb|AGHY01002098.1|_573_160	573	160	-	Membrane protein, putative		FIG00553782	ff	gtggtggccaacgccatctacggcttgctcaatcccattccgttcggctgcttcgtcgccgcattgatcttcgacatcgtctacgtccgcagcggggtgatcctgtggaccaaggcggctgcctggctgatcgcgatcgggctggtcatcgccatcgtgccgcgcctgatcaacctggtgcaggtctggatcacctcgcggcgctcggtgctgccggtggaacggctcgacttctggctgaacctgctcgccgtcgtcgccgccgttttcaattccttcgtgcacagccgcgatgcgtatgcggtggtcccggcagggctctggctctcgatcgccacggtggcgctgttggcgatcgggcatgtgctcattgccatccgcaccatgccacgcgagggc…	MVANAIYGLLNPIPFGCFVAALIFDIVYVRSGVILWTKAAAWLIAIGLVIAIVPRLINLVQVWITSRRSVLPVERLDFWLNLLAVVAAVFNSFVHSRDAYAVVPAGLWLSIATVALLAIGHVLIAIRTMPREGYAHG
gi|348022562|gb|AGHY01002096.1|	fig|487527.6.peg.502	peg	gi|348022562|gb|AGHY01002096.1|_425_102	425	102	-	RND multidrug efflux transporter; Acriflavin resistance protein		FIG00132942	idu(10);Multidrug_Resistance_Efflux_Pumps	gtgaggcgatcgcctgggcgcagcaggtggcgcgcgaggaactgcccgactacgcgcagctcgactggaagggcgaatcgcgcgagtacccagcaggccggtggcgcagtgctgctgaccttcgccctggcattgctgatcgtgtacctggtgctggcggcgcagttcgagagtttcatccacccgctggtgatcatgctgaccgtgcccctgggcgtgctcggcgcgctgatcggcctggcgatcagcggcggcacgctcacctgttcagccagatcggcatcgtcatgctggtggggctggcggccaagaacggcatcctga	MRRSPGRSRWRARNCPTTRSSTGRANRASTQQAGGAVLLTFALALLIVYLVLAAQFESFIHPLVIMLTVPLGVLGALIGLAISGGTLTCSARSASSCWWGWRPRTAS
gi|348022564|gb|AGHY01002095.1|	fig|487527.6.peg.503	peg	gi|348022564|gb|AGHY01002095.1|_4_288	4	288	+	FIG01210044: hypothetical protein		FIG01210042	ff	atggcgaactgcacatcctcgacagcccgttctacgccgacgccgagcaggccccgggccagcgccgcgcgcagcctgcgctacttcagcgacctgggctgcgccgaactggcgcagcagtaccaccagcacaccgacgcagtgctggacggcatcgtgctgcgccggttgttcgacccccgacggctgtcggtgcgctgcctgcgtgcactgcgcgggcgccagccgcatttcccgtggctgtgcatccgcaagcgcgacaacctggcgcgggccgcggcgtag	MANCTSSTARSTPTPSRPRASAARSLRYFSDLGCAELAQQYHQHTDAVLDGIVLRRLFDPRRLSVRCLRALRGRQPHFPWLCIRKRDNLARAAA
gi|348022564|gb|AGHY01002095.1|	fig|487527.6.peg.504	peg	gi|348022564|gb|AGHY01002095.1|_402_881	402	881	+	Acyl-CoA thioester hydrolase		FIG01211934	ff	atgagcggcacccaacgcgaactgaccttccgcttcttggccgaaccgatcgacgtcaactacggcggcaaggtccacggcggcgtggtgatgaagtggatcgaccaggtcggctacgccgccgcggtgggctggagcggccactacagcgtgaccgtggcggtgggcggcatccgtttcgtcgcgccgatccgcatcagcgacatggtcacagtcagcgccaagctggtccacaccggtaccagcagcatgcatttcgccatcgaggtgcgcgcccgcgatccgatgggcggcgagccgcgcctgtgcacccattgcatcatcgtgttcgtggccctggacggcgtcgaaggccggccgaccgcggtgccggcctggcatccggacacgccggaagac…	MSGTQRELTFRFLAEPIDVNYGGKVHGGVVMKWIDQVGYAAAVGWSGHYSVTVAVGGIRFVAPIRISDMVTVSAKLVHTGTSSMHFAIEVRARDPMGGEPRLCTHCIIVFVALDGVEGRPTAVPAWHPDTPEDHRLAEYAQKVMELSKGMEDTIAHYHG
gi|348022564|gb|AGHY01002095.1|	fig|487527.6.peg.505	peg	gi|348022564|gb|AGHY01002095.1|_1082_891	1082	891	-	hypothetical protein				gtggggtgccgcgcctgctggcacggatggacccggcggtgggcgcacgcttcgagcagggccttcgccacgctgttcgccagcgccgactgcgcgccggtgctggccctggcgcaacaggaactggccgcgcacggcggccgcctgttcgatggcgactgccgcaccgcgccggcggactggcgcgcgtaa	MGCRACWHGWTRRWAHASSRAFATLFASADCAPVLALAQQELAAHGGRLFDGDCRTAPADWRA
gi|348022566|gb|AGHY01002094.1|	fig|487527.6.peg.506	peg	gi|348022566|gb|AGHY01002094.1|_126_254	126	254	+	Cell division protein BolA		FIG00021808	ff	gtggcggccttcgccgggatggcgccgttggcccggcaccgcgcggtctacgcggcgctgggcgagatgatgcagaccgacatccatgcgctgtcgatccgcgccgaggtgccgggcgccgcccgctga	MAAFAGMAPLARHRAVYAALGEMMQTDIHALSIRAEVPGAAR
gi|348022568|gb|AGHY01002093.1|	fig|487527.6.peg.507	peg	gi|348022568|gb|AGHY01002093.1|_311_168	311	168	-	hypothetical protein				gtgcggcgatggtgctgcgctacccgcgacgagctgggctaccaggagatcgccgagcaactgcagatctccagccacatggtcaagaaatacatcatcaagggcctggcggtgtgccggcagggcatggcgcgctatgcgtga	MRRWCCATRDELGYQEIAEQLQISSHMVKKYIIKGLAVCRQGMARYA
gi|348022568|gb|AGHY01002093.1|	fig|487527.6.peg.508	peg	gi|348022568|gb|AGHY01002093.1|_686_336	686	336	-	hypothetical protein				gtgcgtcccgaacccttgccggccctgtcgcggctgttcctgcaatggcggccgtcgctgagccgctatttccgcaagcgccgcgccgcggcctgggataccgacgaccctgctgcaggaagtgtggcttcggctgcagcgcagcgaggcgcatgcgccggagatcgccaatcccgaagcctacctgttcaccatcgccgccaacctgatgcgcgagcacgcgctgctgcaccagcgcagcagccagcgcgatacctgcctggacgacgtgctggaccggctggcagtgccctgcgaggccgatgcgcaggtgcaccgcgcgcacgcgccggcagcgcctggccgaactga	MRPEPLPALSRLFLQWRPSLSRYFRKRRAAAWDTDDPAAGSVASAAAQRGACAGDRQSRSLPVHHRRQPDARARAAAPAQQPARYLPGRRAGPAGSALRGRCAGAPRARAGSAWPN
gi|348022570|gb|AGHY01002092.1|	fig|487527.6.peg.509	peg	gi|348022570|gb|AGHY01002092.1|_40_357	40	357	+	Permease		FIG01212595	ff	gtggccgcggtcccggcgatcctgctgggtttcaccgtcagcccgcaggtggcgctgggcgcgctgctgctgttcgtggtgctgcagcaactcgagggccacgtgctgcagcccctgatccaggcgcgtgcggtggacctgccgccggcgttgctgctgttctcgctgttcggcatcggcgtgctgttcgggccgatgggcgtggtgctggcggcgccgctcaccgtggtgctctacgtgctggtcaagcgcctgtacgtgcaacatgcgctgggcgatgccgaaggggcggacggggccggaacgcccgccgcctga	MAAVPAILLGFTVSPQVALGALLLFVVLQQLEGHVLQPLIQARAVDLPPALLLFSLFGIGVLFGPMGVVLAAPLTVVLYVLVKRLYVQHALGDAEGADGAGTPAA
gi|348022572|gb|AGHY01002091.1|	fig|487527.6.peg.510	peg	gi|348022572|gb|AGHY01002091.1|_278_99	278	99	-	hypothetical protein				ttgagcgtcggtcaccaccgtggcgatttcgatgatcgaatcgcgatcggtatccaagccggtcatttccagatcgatccagatcagccgatcgttcgccacgtgcgcttgcgccatatcaccgtcctgtcgttcgcggcggcgatgccggcgcgggagtgtcgtatcaagcgtcaatga	MSVGHHRGDFDDRIAIGIQAGHFQIDPDQPIVRHVRLRHITVLSFAAAMPARECRIKRQ
gi|348022572|gb|AGHY01002091.1|	fig|487527.6.peg.511	peg	gi|348022572|gb|AGHY01002091.1|_313_735	313	735	+	3'-to-5' oligoribonuclease (orn)		FIG00001097	isu;RNA_processing_and_degradation,_bacterial	ttgcccatccgctgcagacgctggaggcgatggacgagtggaaccgcaaccagcaccgcacactccggcctgtggcagcgcgtgctcgacagccgggtcacgctggccgaggccgaggccgagaccatggcgttcctgacccagtggtgcaagcccggcacctcgccgatgtgcggcaactcgatctgccaggaccggcgcttcctgcaccggcagatgccgcggctggagcgtttcttccattaccgcaacctggacgtgtcgacgctgaaggaactggcgcggcgctgggcgccgacggtgtcggccggactgaccaagacctcctcgcataccgcgctcagcgacgtgcacgactccatcgacgaactgcgctactaccgtccgttcatgggcagg…	MPIRCRRWRRWTSGTATSTAHSGLWQRVLDSRVTLAEAEAETMAFLTQWCKPGTSPMCGNSICQDRRFLHRQMPRLERFFHYRNLDVSTLKELARRWAPTVSAGLTKTSSHTALSDVHDSIDELRYYRPFMGRLGGQGEG
gi|348022572|gb|AGHY01002091.1|	fig|487527.6.peg.512	peg	gi|348022572|gb|AGHY01002091.1|_1667_690	1667	690	-	Potassium efflux system KefA protein / Small-conductance mechanosensitive channel		FIG00021330	idu(1);Potassium_homeostasis	gtggcgatcctgatcctggtgatcggaatgtggatcgccaagcgcctgagcctgtggttgcagcgcgtcctgctgcgtgcgcgggtggaaaccacgctcagcaacttcctgcgcaacgtcgcctatgcgttgatgctggtgctggtgctggtcactgcgctgcagaagatcggcgtgccgccgacctcgctgttcgccgtgctcggcgccgccggcctggccgtgggcctggcgctgaaggactccctgtccaacatcgcctccggggtgatgctgatcgtgctgcggccgatgcgcgacggcgaccacgtcgtggtggccggccaggaaggcgtggtcgacgagatccggatcttccagacccgcatccgcaccttcgacgagcgcatggtgaccctg…	MAILILVIGMWIAKRLSLWLQRVLLRARVETTLSNFLRNVAYALMLVLVLVTALQKIGVPPTSLFAVLGAAGLAVGLALKDSLSNIASGVMLIVLRPMRDGDHVVVAGQEGVVDEIRIFQTRIRTFDERMVTLPNSTITTAPIVNYSTLPNRRLEITVGVGYGDDLKKAQELLLKIAQDNPNILKTPAPFVQVTNLGESTVDLMLFGYAKNGDFGAAKSTTLEQIRNQLLENGLSIPYPQRDLHVYHHDADGRPIAELLTKGRHRRRRDQAGTAAGALSGGVILVISCIRPTRIGRRAASPRSGAKARSAGQPSPCPPSLPMNGR
gi|348022574|gb|AGHY01002090.1|	fig|487527.6.peg.513	peg	gi|348022574|gb|AGHY01002090.1|_50_253	50	253	+	hypothetical protein				gtgcagcgcctgcgccagcaggtggaagcgctggacgaccagatccacagtcccgccgacctggcgcgggtcggcgcagttcgagcaaggtgccgcgctgctggccggtccggcgttctccgaccaggccgtgatcgaggcgctcggcagccccggctgggcattgccgtcgatggcagccgtggcgttgcagcgccgtcgtga	MQRLRQQVEALDDQIHSPADLARVGAVRARCRAAGRSGVLRPGRDRGARQPRLGIAVDGSRGVAAPS
gi|348022575|gb|AGHY01002089.1|	fig|487527.6.peg.514	peg	gi|348022575|gb|AGHY01002089.1|_397_843	397	843	+	PilL protein		FIG01212501	ff	gtgcgccgctacctggcgcagccgcagcggccggtggtggaggcggtcccgaccgaacagcgccgcgtgccgctggtgatggtggtcgacgactcgctgaccatgcgcaaggtcaccggccgcgtgctggaacggcacaacttcgacgtggtgtccgcgcgcgacggcgtcgaggcgctggaacgcctggaagagcgcgtgcccgacctgatgctgctggacatcgagatgccgcgcatggacggctacgaactggcgaccgcgatgcgcgccgacccgcgctacgccgccgtgccgatcgtgatgatcacctcgcgcagcggcgaaaagcaccgccagcgcgccttcgaactgggcgtgcagcgctacctcggcaagccttatcaagagttggatctg…	MRRYLAQPQRPVVEAVPTEQRRVPLVMVVDDSLTMRKVTGRVLERHNFDVVSARDGVEALERLEERVPDLMLLDIEMPRMDGYELATAMRADPRYAAVPIVMITSRSGEKHRQRAFELGVQRYLGKPYQELDLMRNVYDLLGIARVRE
gi|348022579|gb|AGHY01002087.1|	fig|487527.6.peg.515	peg	gi|348022579|gb|AGHY01002087.1|_84_299	84	299	+	short chain dehydrogenase				gtgaatgcctggaccatccagttggcctacgaactgcgcgagaccccgatcaaggtcaacaccatccaccccggctacgtgaagaccgacatgaacgcgggcgagggcgagctggaggtggccgacggcgcgcgcagcagcgtgatgatggcgctgctcgatgccgatggccccactggcagctacacccatgtcggacaggtgctgccatggtga	MNAWTIQLAYELRETPIKVNTIHPGYVKTDMNAGEGELEVADGARSSVMMALLDADGPTGSYTHVGQVLPW
gi|348022583|gb|AGHY01002085.1|	fig|487527.6.peg.516	peg	gi|348022583|gb|AGHY01002085.1|_681_815	681	815	+	Rrf2 family transcriptional regulator, group III		FIG00001194	isu;Rrf2_family_transcriptional_regulators	gtgaatgccgcactcgaaggcacgttcgcagaggccgaggcgttgctgttgaagcggttttcggagatcacccttgccgacctggccgcggacttcgcgcgccggcatgcggcagcacgacgtaccaggagttga	MNAALEGTFAEAEALLLKRFSEITLADLAADFARRHAAARRTRS
gi|348022587|gb|AGHY01002083.1|	fig|487527.6.peg.517	peg	gi|348022587|gb|AGHY01002083.1|_125_487	125	487	+	hypothetical protein				gtgatcgccgacagcagcggcctgtccggccgcgacctacacacgctggtcgcgcgggtggccgccgagtgcgtggacggcacgctggacaatgccaccctgctgacccaactgcgcgcgctgcgcggcaaaggctccaccgccgtcgccacgctcggctgggacgacatcgtgctgccggcggccacggtcgaggagttcgtcggcctgggcaaggaactgcgcaatgccgagaccctggccacgctgggcgtgcgcggtgccacgcggcatcctgatggtcggcccgccgggcaccggcaaaacccaggtcgcgcggatcctggccagccagtcgggcttggccttcatcgccctgagtag	MIADSSGLSGRDLHTLVARVAAECVDGTLDNATLLTQLRALRGKGSTAVATLGWDDIVLPAATVEEFVGLGKELRNAETLATLGVRGATRHPDGRPAGHRQNPGRADPGQPVGLGLHRPE
gi|348022587|gb|AGHY01002083.1|	fig|487527.6.peg.518	peg	gi|348022587|gb|AGHY01002083.1|_465_1037	465	1037	+	cell division control protein CDC48 homolog				ttggccttcatcgccctgagtagcgccgacctcaaggccggctatctcggacagtccggccagcgcgtgcaggccgcattcgagcgcgcacgggcgcaggcgccgtgcatcgtgttcgtcgacgagctcgacatcgtcgcgccggcgcgcggtgccgacggcgacgacgcctacacccgcgagatcgtcggccagctgctgcaggaactggacggcgtcgccagccacgccggccaggtgtttctgctggccgccagcaaccatgccgcggcgatcgacccggcgctgctgtcgcggctggaccggcagatcgtcatcgccctgcccgaccgcgatgcccgtgtcgccatcgtcgcgcgcctgctgcgcggcaaaccgctggacctcgatgccgacgcc…	MAFIALSSADLKAGYLGQSGQRVQAAFERARAQAPCIVFVDELDIVAPARGADGDDAYTREIVGQLLQELDGVASHAGQVFLLAASNHAAAIDPALLSRLDRQIVIALPDRDARVAIVARLLRGKPLDLDADAAATWVADRSEGQSGRDLQTWISRAMRRAVRRALQDSDDASGTRLQWDDLVETANATT
gi|348022587|gb|AGHY01002083.1|	fig|487527.6.peg.519	peg	gi|348022587|gb|AGHY01002083.1|_1322_1816	1322	1816	+	Gluconokinase (EC 2.7.1.12)		FIG00000861	isu;D-gluconate_and_ketogluconates_metabolism	atgggcgtctccggcagcggcaagaccagtgtcgctcaggcactggcggcgcactaccggctgaccttcctggatgcggacgatttccacagcgccgccgccaaggcgcagatggcgcatggcattccgctcagcgatgcacagcgcgcgccctgggtcgccgccctggcgcagcgcctgcgcgcatcggtcgatgcagggcagagcgtcgtgctggccttctcggggctgcgcaaggcgcaccggcagcagttacgggacactggagtgccgatgcgtttcgtgttcctgcatgcggcggcgcatgtgatcgccgaacgcctggctgcgcggcatggtcacttcatgccgccggcactgctgcagagccagctcgacacgctggaactgccactggac…	MGVSGSGKTSVAQALAAHYRLTFLDADDFHSAAAKAQMAHGIPLSDAQRAPWVAALAQRLRASVDAGQSVVLAFSGLRKAHRQQLRDTGVPMRFVFLHAAAHVIAERLAARHGHFMPPALLQSQLDTLELPLDEPDVISVDVDAPFDKVVADAIAQLDATVTIA
gi|348022587|gb|AGHY01002083.1|	fig|487527.6.peg.520	peg	gi|348022587|gb|AGHY01002083.1|_1851_2024	1851	2024	+	hypothetical protein				gtgcctggcgcggtgatgccgcagcatcgggcgcaccagacaacgccaccacgcgactacgcccagcgatggcgatcccgacaccgcggcatcgggatcgcgcgcaccggccgctcgcaactcagcgatgcggcgcatgctcggcatgccgcaccggctcatggcgattggtga	MPGAVMPQHRAHQTTPPRDYAQRWRSRHRGIGIARTGRSQLSDAAHARHAAPAHGDW
gi|348022587|gb|AGHY01002083.1|	fig|487527.6.peg.521	peg	gi|348022587|gb|AGHY01002083.1|_2248_2009	2248	2009	-	DUF378 domain-containing protein		FIG01005871	ff	gtgacccaggctgcaatttctcccccacgtcgagatgccgccatgaaagtgctcaatatcgtcaccctggttctgttgattgttggcgggctcaactgggggttggtcggcctgttccagttcgacctggtcgcggcgctgttcggcggccaggacgcgccgctgtcgcgcgtggtctatgcgctggtcgggctgtcggcgctgtgggcaactggtgccgttgttcaccaatcgccatga	MTQAAISPPRRDAAMKVLNIVTLVLLIVGGLNWGLVGLFQFDLVAALFGGQDAPLSRVVYALVGLSALWATGAVVHQSP
gi|348022589|gb|AGHY01002082.1|	fig|487527.6.peg.522	peg	gi|348022589|gb|AGHY01002082.1|_843_82	843	82	-	Ubiquinone/menaquinone biosynthesis methyltransferase UbiE (EC 2.1.1.-)		FIG00006851	isu;Menaquinone_and_Phylloquinone_Biosynthesis isu;Menaquinone_Biosynthesis_via_Futalosine_--_gjo isu;Menaquinone_Biosynthesis_via_Futalosine isu;Ubiquinone_Biosynthesis	atgagcgaatctccctacaagaccggtaccacccatttcggcttccgcgacgtcgccgccaaggacaagcagaagctggtcggcgaggtcttcacctcggtcgccggcaactacgacctgatgaacgacctgatgagcatgggcatccatcgggtctggaagcgctatttcgtcgccaccgcgcaggtcaagccgggcgaccgcgtgctcgacctggccggcggcaccggcgacatcgccgcgctgctgaaggaccgggtcggcgccgacggcgagatcgtgctgggcgacatcaacgccggcatgctctcggtgggccgcgaccgcctcaccaaccgcggcctggtcgcgggcctggactacgtgcaatgcaatgccgaggcgctgccgttcccgacc…	MSESPYKTGTTHFGFRDVAAKDKQKLVGEVFTSVAGNYDLMNDLMSMGIHRVWKRYFVATAQVKPGDRVLDLAGGTGDIAALLKDRVGADGEIVLGDINAGMLSVGRDRLTNRGLVAGLDYVQCNAEALPFPTRASTLVTIAFGLRNVTDKDAALREMYRVLKVGGQARVLEFSEVTADWFKPLYDFHSFKVLPRLGKLFAKDADSYQYLAESIRKHPPQDALKGMMEEAGFARSHYKNLTGGIVAIHSGYKI
gi|348022593|gb|AGHY01002080.1|	fig|487527.6.peg.523	peg	gi|348022593|gb|AGHY01002080.1|_148_318	148	318	+	transcriptional regulator		FIG01211145	ff	ttgcgcgaactgctcgccgatgcgcgcctggcgcatgcgatgcagctgctgtacaccacgcgctggccgctgaagacggtcgccgcgcacgccggctaccgctcggttcgcagcttcagccaacgcttccagcaacgctacggcctggatccggccagcatcggcaattga	MRELLADARLAHAMQLLYTTRWPLKTVAAHAGYRSVRSFSQRFQQRYGLDPASIGN
gi|348022597|gb|AGHY01002078.1|	fig|487527.6.peg.524	peg	gi|348022597|gb|AGHY01002078.1|_143_550	143	550	+	Methionine ABC transporter ATP-binding protein		FIG00006151	idu(1);Methionine_Biosynthesis	atggaagtgatccgccgggtctgcgaccgcgtggcggtgctcgatgccgggcacctggtcgagagcgggccggtcaccgaggtgttcctgcatccgcagcatccgaccaccaagcgcttcgtctccgaagccgagcacgtcgacgagggcgacctgcaccgcgacctcaccgcggtggacgggcgcatcctgcgcctgaccttcctcggcacagacacctacgcgccgctgctcgggcgcatcgcccgcgccacggcggtggactacaacatcctgtccgggcgcatcgaccggatcaaggacaccccctacggccagctcaccgtggccctggtcggtggcgacatggatgcggcgcaggccgagttcgtcgctgccggcgtgcacgtgcaggagttg…	MEVIRRVCDRVAVLDAGHLVESGPVTEVFLHPQHPTTKRFVSEAEHVDEGDLHRDLTAVDGRILRLTFLGTDTYAPLLGRIARATAVDYNILSGRIDRIKDTPYGQLTVALVGGDMDAAQAEFVAAGVHVQELRR
gi|348022599|gb|AGHY01002077.1|	fig|487527.6.peg.525	peg	gi|348022599|gb|AGHY01002077.1|_1000_1671	1000	1671	+	hypothetical protein				atgatcccgctgatgagcctgcgcgagacgctggacgcctttgccgcctgcaacgacgagggccacgtacacgaggcgttcggctgggtgcatgcgaccggtgaggatccgctgcaggcgcgcttctggttgccgccagacgaagccaccgcgttcgacgacgatggcgcagtgccggcggcggcgcgcgcgctgggcctggcgccctacctggaaccggcgacgttcgccgatgtgctggatgtgcagaagcggcaatgcccgctgtccacgttgcaggactacgcgcaggcgttggcctactacgccgagtccgacgcgttcctgcaggtggagggtgtggacgaggccctgggcgaggcggacgaggacgcctgggaggcggcccgtgcactgggc…	MIPLMSLRETLDAFAACNDEGHVHEAFGWVHATGEDPLQARFWLPPDEATAFDDDGAVPAAARALGLAPYLEPATFADVLDVQKRQCPLSTLQDYAQALAYYAESDAFLQVEGVDEALGEADEDAWEAARALGVGPGIFASFDLVLARCPPEQMKPAAQQVARLLDWTIGRALAACRAGPLTVGEALDRRRATAIAADFAALAVPLQILGYKAFPWMPVPTLA
gi|348022603|gb|AGHY01002075.1|	fig|487527.6.peg.526	peg	gi|348022603|gb|AGHY01002075.1|_498_752	498	752	+	Phosphate-specific outer membrane porin OprP ; Pyrophosphate-specific outer membrane porin OprO			idu(3);Phosphate_metabolism	atgaccgcaccgggctccaacttcggccagttcctggagcgcagcggcgcggccagtacgctggcgccgctgtaccgcaaggcggtgtcgtggcaggccgcaggcaccgactacacctgggccgccagcgtctacagcctgcagagcatcgacgtctccaacgtccgcggccatgcgttcggcggccgcggcacctggggcgccgggtgcgcgcgacggcgacgtgctgcacctgggcctgtcgctggcgcatga	MTAPGSNFGQFLERSGAASTLAPLYRKAVSWQAAGTDYTWAASVYSLQSIDVSNVRGHAFGGRGTWGAGCARRRRAAPGPVAGA
gi|348022605|gb|AGHY01002074.1|	fig|487527.6.peg.527	peg	gi|348022605|gb|AGHY01002074.1|_595_32	595	32	-	Inositol-1-monophosphatase (EC 3.1.3.25)		FIG00002332	isu;Di-Inositol-Phosphate_biosynthesis	ttgcgccacatcaaccgcctggaagcgctgaacgtggtgcagaaggaccgcatggactacgccagcgaagtcgatgccgatgccgagaaggtgatcgtcaaggagctgcgccgcgcctatcccgattacggcgtgatgggcgaggaaagcggcgtgcagggcggtggccgctacatgtgggtgatcgatccgctcgacggcaccagcaactacctgcgcggcttcccgcactactgcgtgtcgatcgccctggtcgagaacggcgagccggtcgacgcggtgatcttcgatccgctgcgcaacgaactgttccccgccagccgcggcaacggcgccgtgctcaacgatcgccgcatccgcgtcagcgagcgcaaggaactcaacggcgccatggttcca…	MRHINRLEALNVVQKDRMDYASEVDADAEKVIVKELRRAYPDYGVMGEESGVQGGGRYMWVIDPLDGTSNYLRGFPHYCVSIALVENGEPVDAVIFDPLRNELFPASRGNGAVLNDRRIRVSERKELNGAMVPHRFRPARAQARQPAAEVRGRAAGAGRGHPPHRLGRRWTWPTSPAVAATPTSKPG
gi|348022611|gb|AGHY01002071.1|	fig|487527.6.peg.528	peg	gi|348022611|gb|AGHY01002071.1|_453_97	453	97	-	Beta-lactamase (EC 3.5.2.6)		FIG00000747	idu(2);Beta-lactamase idu(2);Tn552	atgcgctcgggctggcgccgcgcacgcgtcaactcggccagctacgcgctgggctggcgcgtgttcgactactccggccaccaggtgatcttccatgccggtgcggtgcagggctaccgcggcctgatcgcgctggtgccggaacgcgacttcgctgtggcgattctgtggaacggcgaaagcggcctgccctcgggcctgctgccgaccgtcctcgaccgcgcgatcggcctgccggcgcagcgctggctggacgtggacaccgacttcggcagcgacaacctgatggccgagcgtccggacccgaaggacaagaagggcgcgtcctcgtccaagtcggtagcctcgccgcactga	MRSGWRRARVNSASYALGWRVFDYSGHQVIFHAGAVQGYRGLIALVPERDFAVAILWNGESGLPSGLLPTVLDRAIGLPAQRWLDVDTDFGSDNLMAERPDPKDKKGASSSKSVASPH
gi|348022613|gb|AGHY01002070.1|	fig|487527.6.peg.529	peg	gi|348022613|gb|AGHY01002070.1|_11_127	11	127	+	hypothetical protein				gtgttcccgccgtaccaggtcgggccatacgccgatggcacgcagaccgttgacgtgccggccagcgtgctgcgcgaactggtggcgccggagtacgcgccgctgttcgccgcctga	MFPPYQVGPYADGTQTVDVPASVLRELVAPEYAPLFAA
gi|348022615|gb|AGHY01002069.1|	fig|487527.6.peg.530	peg	gi|348022615|gb|AGHY01002069.1|_592_449	592	449	-	hypothetical protein				atgcgcgccgacctgaaagatgctgttcggcgcgcagcgctacgacatcgccactcctatcgcgtttacagcgccacccacctgatcgcggcggccacgcaaatgcgtcaagcattcgtcgcgcaacgcaaatgcatcggttaa	MRADLKDAVRRAALRHRHSYRVYSATHLIAAATQMRQAFVAQRKCIG
gi|348022615|gb|AGHY01002069.1|	fig|487527.6.peg.531	peg	gi|348022615|gb|AGHY01002069.1|_903_754	903	754	-	ferric enterobactin receptor				gtgactgtcggcggcgacaacgtgctcaacgaataccccgaccgcttgcgcgccggtgccggcacccgcacctacctgccgtacagcacttcctcgccgttcggcttcaatggcgccttcgcctacgccaacgtcaactacagctggtaa	MTVGGDNVLNEYPDRLRAGAGTRTYLPYSTSSPFGFNGAFAYANVNYSW
gi|348022617|gb|AGHY01002068.1|	fig|487527.6.peg.532	peg	gi|348022617|gb|AGHY01002068.1|_19_222	19	222	+	putative secreted protein				gtggcgggcacggtgcgcgccgccgtgggcagggtcaacgacacgctgtgggtactgccgatgggggcggatgtggcgcgcgtgaccttgccggcgaagggggccagcaccacgggcgcggtggtgtaccagacctctggcttcgtcgtgcgcgtggtgcccggcagcggtggcagcgcctggcagatcagcgccgcagattga	MAGTVRAAVGRVNDTLWVLPMGADVARVTLPAKGASTTGAVVYQTSGFVVRVVPGSGGSAWQISAAD
gi|348022619|gb|AGHY01002067.1|	fig|487527.6.peg.533	peg	gi|348022619|gb|AGHY01002067.1|_75_470	75	470	+	Histone acetyltransferase HPA2 and related acetyltransferases			ff	atgtcgtcccctgttcctgccgccgccggcggtccgtttcggccgcctggcgccgaccgtgcccgtcgccgggatcgcccgccgccgtcgccttctacaccgatcgccccgcgcttccgcagcgtgttccagaacggcagcccggtccggcttcgtgatcctgaagaaggacgacgccgaactgcacctgactttgcgcgccggccaccgcggccagcaccagcaacgtcgcccacctgctggtcgacgacgccggcggcgctgcacgaccgcctgcaggcgcagggcgtgcgcatcatcaaggcgatccgcgacgccgacttcggcctgcgctgcttcgtcttcgccgaccccgacggcaaccgcatcgacgtcggccagcccctgccgcgctga	MSSPVPAAAGGPFRPPGADRARRRDRPPPSPSTPIAPRFRSVFQNGSPVRLRDPEEGRRRTAPDFARRPPRPAPATSPTCWSTTPAALHDRLQAQGVRIIKAIRDADFGLRCFVFADPDGNRIDVGQPLPR
gi|348022621|gb|AGHY01002066.1|	fig|487527.6.peg.534	peg	gi|348022621|gb|AGHY01002066.1|_608_390	608	390	-	pilus biogenesis protein		FIG01210133	ff	gtgtccaacgcgctcaacaccctcatcaagaacatctccatcgccgcgcaccagcagtcggcggcggcgatcgacatcacccagacgatggacgtgatccggcagatcaccggacagacctcgcagggcgcgggacagaccgccgaatcgatcggccgcctggcgcaactggcggcggacctgcggcgctcggtcgccgacttcaagctgccggcgtaa	MSNALNTLIKNISIAAHQQSAAAIDITQTMDVIRQITGQTSQGAGQTAESIGRLAQLAADLRRSVADFKLPA
gi|348022623|gb|AGHY01002065.1|	fig|487527.6.peg.535	peg	gi|348022623|gb|AGHY01002065.1|_124_384	124	384	+	Transcriptional regulator		FIG00732284	ff	atgcggcactgcgcgcgcaccggcctgcagcgccgcgtggtgctgtcggtgccgcacttcctgttcgtcgtcgcggcgctccagcgcagcgacctggtggcgatgctccccgagcgcctggtgcgtgggcagtccggcctgcaggtgtgcgcaccgccgatggaactgccgggctacgaaatggccatgctctggcatgagcgcgtacaccgcgatccggcgcatcgctggttgcgcgagcacctcctcgcgtcgatctga	MRHCARTGLQRRVVLSVPHFLFVVAALQRSDLVAMLPERLVRGQSGLQVCAPPMELPGYEMAMLWHERVHRDPAHRWLREHLLASI
gi|348022625|gb|AGHY01002064.1|	fig|487527.6.peg.536	peg	gi|348022625|gb|AGHY01002064.1|_438_587	438	587	+	Mutator mutT protein (7,8-dihydro-8-oxoguanine-triphosphatase) (EC 3.6.1.-)		FIG00000892	idu(1);Nudix_proteins_(nucleoside_triphosphate_hydrolases)	gtgccgatcgcgcagatggacacgctgccgatgtgggagggcgaccgccacttcctgccgctggtgttcgatggcgacccgcgcccgttccatggggtcatgccgtaccgcgacggacgcatgcagtcctggcgctattcgcgggtctga	MPIAQMDTLPMWEGDRHFLPLVFDGDPRPFHGVMPYRDGRMQSWRYSRV
gi|348022631|gb|AGHY01002061.1|	fig|487527.6.peg.537	peg	gi|348022631|gb|AGHY01002061.1|_358_98	358	98	-	TonB-dependent receptor		FIG00004179	idu(60);Ton_and_Tol_transport_systems	gtgcaggcgcgcgcgcagggcgactactacatcgacgagcgcaacacgcagggcaagtacggcggcttccgcgtggtcgacgccagcgtgcgctaccagctcagcccgcgcgtcagcctcgacctgcaggtcaagaatctcaccgacaaccgctacgcctacgtctggtacgacagtttcttctggggtggcaacaaccagccgatgttctcgccagcgcccgggcgctgggcctatctcgggttcgaactgcggctgtag	MQARAQGDYYIDERNTQGKYGGFRVVDASVRYQLSPRVSLDLQVKNLTDNRYAYVWYDSFFWGGNNQPMFSPAPGRWAYLGFELRL
gi|348022633|gb|AGHY01002060.1|	fig|487527.6.peg.538	peg	gi|348022633|gb|AGHY01002060.1|_827_378	827	378	-	Positive regulator of CheA protein activity (CheW)		FIG00000652	idu(2);Two-component_regulatory_systems_in_Campylobacter idu(2);Bacterial_Chemotaxis	atgttcggtgtcggcatcctcggcatcaaggagatcatcgagtaccgcacgccgaccgacgtgccgatgatgccgccggccctgcgcggggtgatcaacctgcgcggcgcggtggtgcctgtggtggacctgcagcagcgcttcggccgcgcgcccagcgagatcagcaagcgcacctgcatcgtcatcatcgaggtcgccagcggcgaggagcgccaggtgctcggcctgctggtggacgcggtcagcgaggtgctggagatcgccacggcggacatcgcgccgccgccggcgttcggcaccggcattcgccgcgatttcatccacggcatgggcaaggtcggcgagcggttcgtgatcctgctcgccgccgacgcggtgctggcgcctcaggagttc…	MFGVGILGIKEIIEYRTPTDVPMMPPALRGVINLRGAVVPVVDLQQRFGRAPSEISKRTCIVIIEVASGEERQVLGLLVDAVSEVLEIATADIAPPPAFGTGIRRDFIHGMGKVGERFVILLAADAVLAPQEFASMAGLDAHVEEGIAA
gi|348022633|gb|AGHY01002060.1|	fig|487527.6.peg.539	peg	gi|348022633|gb|AGHY01002060.1|_1126_848	1126	848	-	hypothetical protein				atgagcgcgcaggccgaacaattgcagcagctgatgagcttcttcaaggtgcagggcaccccgccggccaggaccgcggcgcggcgtcccggcaccgtgcgcggccgcagcgggcacgccggaggccaagccgatcgcacgcgtcgccggcggccagctggtcctggccgactcgctcgacgaagcccacttcgaaaccttctgagacatggccatgaacgctcccgcttcgctctcaccctccgacgccggcgaccctggcgacggaccagttcctga	MSAQAEQLQQLMSFFKVQGTPPARTAARRPGTVRGRSGHAGGQADRTRRRRPAGPGRLARRSPLRNLLRHGHERSRFALTLRRRRPWRRTSS
gi|348022635|gb|AGHY01002059.1|	fig|487527.6.peg.540	peg	gi|348022635|gb|AGHY01002059.1|_298_152	298	152	-	Aerobic C4-dicarboxylate transporter for fumarate, L-malate, D-malate, succunate, aspartate		FIG01304615	idu(1);Pyruvate_metabolism_I:_anaplerotic_reactions,_PEP	gtgaagatgatcatcgcgccggtgatcttcctgaccatcgtcaccggcatcgccggcatgacccacctgaagacggtggggcgggtgttcgccaaggcgatggtgtacttcctgttcttctccaccctggcgcgatcgtcggcatga	MKMIIAPVIFLTIVTGIAGMTHLKTVGRVFAKAMVYFLFFSTLARSSA
gi|348022637|gb|AGHY01002058.1|	fig|487527.6.peg.541	peg	gi|348022637|gb|AGHY01002058.1|_839_138	839	138	-	glutamine synthetase family protein		FIG00138192	idu(1);Glutamine,_Glutamate,_Aspartate_and_Asparagine_Biosynthesis	atgcgctggccgcctgcgacgatgcggtgctgctcaagcgcgcgatcaaggcgatcgcgcagcagcaaggcctgctcgccagcttcatggccaaggccgttcgcggcgcagtccggcagcggcctgcacctgcacgtgagcctgctcgagcggcgccggcgacaacgtgttcgcctgcaccccgccaggcaccggcggcgcccttgcgccacgccatcggcgggctgcagcggcagcgccgaggactgcctgctgctgttcgcgccgcacgccaacagctaccggcgcttcgtcgccaatgccttcgtcccgctcaacgacagctggggcttcaacaaccgtaccgtggcgatgcgggtgccgcacagcgacccggccaacacccgcatcgaacaccgc…	MRWPPATMRCCSSARSRRSRSSKACSPASWPRPFAAQSGSGLHLHVSLLERRRRQRVRLHPARHRRRPCATPSAGCSGSAEDCLLLFAPHANSYRRFVANAFVPLNDSWGFNNRTVAMRVPHSDPANTRIEHRIAGADANPYLVAAAVLAGIEHGLAQNIDPGPPTQGNAYEQHAAREPDWRGAIARFLDSDFAATAFGTRFRHIYGQQKRRELLDFQTQVSDVDYRWYLRTV
gi|348022639|gb|AGHY01002057.1|	fig|487527.6.peg.542	peg	gi|348022639|gb|AGHY01002057.1|_915_703	915	703	-	polyvinylalcohol dehydrogenase				ttggtctatgccggttcgatgtccggcgcgatgaccgtgctcgacgccaagaccggcgccaccctgtggagcttcgatgccggcggttcggtgtccagcgcgccggcgatcgtcgatggcgcggtgtactggggcgccggctacagtcgcttcaacttcggcaccggcgtcaacaagctgtacaagttcgtgccgtcgaaccggcgccgctga	MVYAGSMSGAMTVLDAKTGATLWSFDAGGSVSSAPAIVDGAVYWGAGYSRFNFGTGVNKLYKFVPSNRRR
gi|348022643|gb|AGHY01002055.1|	fig|487527.6.peg.543	peg	gi|348022643|gb|AGHY01002055.1|_437_96	437	96	-	hypothetical protein				atggcggcgcgggcacggccggctatcattccgtatggctgccgttttccctgcgtacgagcgtgttcgatgagcgatgtcctgttgttgcaacgatccggcaaggtcctgacgctgcagttgaacccgacccgaggtccgcaacgccttcgacgccgcgctgatcgcccagctcagcgacgccctgctgcagatcggcaccgatccgcaggtgcaggtgctggtccctggccggcgccggcgcggcgttctcggccggggcggacctgcagtggatgcgctcgatggccggcgccagcgagcaggaaaacctggacgacgcgctggccctggcgcggctga	MAARARPAIIPYGCRFPCVRACSMSDVLLLQRSGKVLTLQLNPTRGPQRLRRRADRPAQRRPAADRHRSAGAGAGPWPAPARRSRPGRTCSGCARWPAPASRKTWTTRWPWRG
gi|348022649|gb|AGHY01002052.1|	fig|487527.6.peg.544	peg	gi|348022649|gb|AGHY01002052.1|_566_237	566	237	-	TonB-dependent receptor		FIG00004179	icw(3);Ton_and_Tol_transport_systems	atggcctcgatcagcccgaccctgtacttcgacatcgacggccgaccgctggagctgtcggccaccgcttatcgcatgggccagcgctacgtcgactacaccaacgccaccgccctgcccgcctacaccacctacgagctgggcctgttcgcgcggttgagtgagcacctggaactgcagttgcacgcggccaacgtcggcaacacgctgggcctgaccgaaggcaatgcgcgcgtggacacgctgtccggccagggcactgccgacgcgatctacgcgcggccgatcttcggccgcaactacaacgcgtcgctgacctggcggtggtga	MASISPTLYFDIDGRPLELSATAYRMGQRYVDYTNATALPAYTTYELGLFARLSEHLELQLHAANVGNTLGLTEGNARVDTLSGQGTADAIYARPIFGRNYNASLTWRW
gi|348022649|gb|AGHY01002052.1|	fig|487527.6.peg.545	peg	gi|348022649|gb|AGHY01002052.1|_1282_635	1282	635	-	TonB-dependent receptor		FIG00004179	icw(3);Ton_and_Tol_transport_systems	gtgacgcagaacggcttcgtgcgctacggcaacggcgtcaccagcggcgtcgccaacggcacctacttgtcgccgtacctgtgggattcggtacgcttcggccgcctcggcctggacgccggcgtgcgctacacccgctacaacgcaagcggcggcgtgtacgccgccaccacgcgcgatctcggcgatccgaccacgctggccgacgacaacgtcggcggcctcagcggcgcgttcagcccgcgcaccgatcatcgccacgccacgcagtggacgctcggcgccgaattcgcgctgaccccgcagctgcagaccttcgcccgctacacgcaatcgcagcgcctgccgcggctgcagaacgtctaccagacccagaacgcggacgtcaccgacatcgac…	MTQNGFVRYGNGVTSGVANGTYLSPYLWDSVRFGRLGLDAGVRYTRYNASGGVYAATTRDLGDPTTLADDNVGGLSGAFSPRTDHRHATQWTLGAEFALTPQLQTFARYTQSQRLPRLQNVYQTQNADVTDIDQAEAGLRGSFGDTFSFSTVGFWSRFNDLSISAIVLDGTGAVQSLALVGKTRTLGLESEFTWRPSALFGITGSATLRIRRRAA
gi|348022649|gb|AGHY01002052.1|	fig|487527.6.peg.546	peg	gi|348022649|gb|AGHY01002052.1|_2008_1355	2008	1355	-	TonB-dependent receptor		FIG00004179	icw(3);Ton_and_Tol_transport_systems	atgcggtgctcgacgtcgacgccaagtacctcgacgaccgcaccgccttctacaacccgatcccgctcgccgaccccgcgcaatccgtcgcagtcgctgtcggcgctgctcgacccgctggacggcacgctgctgtccaacgacctgcgccacaccacggccctgaccttcgacggcactacaccgctggcgcgcaacctggacctggccgacggcatccacagcaaggtcaagcaactcggcacgcacctggaatgggacctgggcgacggcctgaccctcaacaaccgcatgcgcttcgtcgatgcggacgtggactacaccgcgctgttctccggcgctgcgccctacgacgccggcgcctacctcaccacccagctcggccgtgcgcgcagcggc…	MRCSTSTPSTSTTAPPSTTRSRSPTPRNPSQSLSALLDPLDGTLLSNDLRHTTALTFDGTTPLARNLDLADGIHSKVKQLGTHLEWDLGDGLTLNNRMRFVDADVDYTALFSGAAPYDAGAYLTTQLGRARSGFGARVARVRLRHHPHWRRLRSGHGRRPGAGERPVERAHPSAHAVRRPAPEQGVRRHGAGPAHAHRPASTCSTSNTPRTGCRTPC
gi|348022649|gb|AGHY01002052.1|	fig|487527.6.peg.547	peg	gi|348022649|gb|AGHY01002052.1|_2431_2024	2431	2024	-	TonB-dependent receptor		FIG00004179	icw(3);Ton_and_Tol_transport_systems	gtgcgcggcctgcccgcgggcggctggtactacgtgcagtaccaggaagacggcctgaccctgttcgacgaagccgcaggaaagcttcttcaacgtcgacaccctgttcgcgctggacatgatgaccgagcgcctggaagtggtgcgcggcggcacctcgccgctgttcgcgaccaacgcgccgggcggcacggtcaacgccatcacccgccacggcaccgccaccccggaaggcgcggtgcgcatgaccgtcggcagcgacggcctgcgccgcgaggacgcctacagcgccggcccgctcagcgagaacgtgctgtacagcatcggcggctacccaccgcagcgacgacggcctgcgccacaccggctacaccgccgaccagggcggccagctgcgcg…	MRGLPAGGWYYVQYQEDGLTLFDEAAGKLLQRRHPVRAGHDDRAPGSGARRHLAAVRDQRAGRHGQRHHPPRHRHPGRRGAHDRRQRRPAPRGRLQRRPAQRERAVQHRRLPTAATTACATPATPPTRAASCAAT
gi|348022651|gb|AGHY01002051.1|	fig|487527.6.peg.548	peg	gi|348022651|gb|AGHY01002051.1|_200_961	200	961	+	Colicin V production protein		FIG00001121	isu;At5g04520_AT1G06240	atgatcgacatggtgctgttgacggtgatcctggtctcggccctgctcggggccctgcgcgggttcgtcggcatcgtggtcggcacgctgtcctggttcctggccggctgggccacgttccagttcggcggcaataccgggcgctggctcgccgatggggcgcggccgagcatgagctactacctgggcggctacgcgctgaccttcgtgacggtgatggcggtggtcgccatcgtcggcatggtgatccgcaccgcggtgcgctcgaccgcgctgtcgggcaccgaccgcgcgctcggcttcggcctgggcacggtgcgcggcggtttcttcgccgcggtgctggccttcctgatgagcttcacgccgctgacccgcgagccggactggcagcattcg…	MIDMVLLTVILVSALLGALRGFVGIVVGTLSWFLAGWATFQFGGNTGRWLADGARPSMSYYLGGYALTFVTVMAVVAIVGMVIRTAVRSTALSGTDRALGFGLGTVRGGFFAAVLAFLMSFTPLTREPDWQHSMVLPVLSPGVGWMRAQMPDWRMPQMPQLNLSQMPQLNVSQMDLGNLPAAGDNAALGNALQASGLQEMMSKALGRPGVRSAQPGGDPSHLMPANIDPAQARPAQFDPARVEPNGQARPPSQ
gi|348022655|gb|AGHY01002049.1|	fig|487527.6.peg.549	peg	gi|348022655|gb|AGHY01002049.1|_35_427	35	427	+	Chitinase (EC 3.2.1.14)		FIG00001347	icw(1);Chitin_and_N-acetylglucosamine_utilization	ttgaaggtgctgatctcgctgggcggctggacctggtcgcgcggattctccagcgccgcgcgcgccgagaaccgccaggccttcgtcgcctcctgcatcgacgcctacatccgcggcaacctgccggtcaccgacggcgccggcggcaacgcggccgcggccggcgtgttcgacggcatcgacatcgactgggaatacccggtggcctgcggcatcgcctgcggcacgcccgaggaccggcagaacttcaccgcgttgctggccgagttccgccgccagctcgaccaagtgcggccggggctgctgctgaccgtggcggtcggcgccggcatcgacaagatcccgtcaccgacccgaacctgtacgcgcaatacctggactacctcaacgtga	MKVLISLGGWTWSRGFSSAARAENRQAFVASCIDAYIRGNLPVTDGAGGNAAAAGVFDGIDIDWEYPVACGIACGTPEDRQNFTALLAEFRRQLDQVRPGLLLTVAVGAGIDKIPSPTRTCTRNTWTTST
gi|348022655|gb|AGHY01002049.1|	fig|487527.6.peg.550	peg	gi|348022655|gb|AGHY01002049.1|_424_822	424	822	+	Chitinase (EC 3.2.1.14)		FIG00001347	icw(1);Chitin_and_N-acetylglucosamine_utilization	gtgatgacctacgacttccacggcgcctgggatccgcagaccaaccatcactccgcgctgttcgaatcgccggccgatccatccagcggcgaccagcgttactacaacagcaacgacgccatccaggccttcctcgaccgtggcgtgccggccgccaagctcaatctcggcatcggtttctacgggcgcggctggaccaacgtgcccaacgtcaaccacggcctgtaccagagcggcagcgccgcggcgggacctacgaggccggcatcgaggactacaaggtgttgcgcggccgcgccggcaccagctacgtcgacgcgcaggcgcgcgcgcactggaagtacgacggcagcaccttctggagttacgacgacccggcactggtcaccgagaagatga	MMTYDFHGAWDPQTNHHSALFESPADPSSGDQRYYNSNDAIQAFLDRGVPAAKLNLGIGFYGRGWTNVPNVNHGLYQSGSAAAGPTRPASRTTRCCAAAPAPATSTRRRARTGSTTAAPSGVTTTRHWSPRR
gi|348022657|gb|AGHY01002048.1|	fig|487527.6.peg.551	peg	gi|348022657|gb|AGHY01002048.1|_137_1267	137	1267	+	Flagellar biosynthesis protein FlhB		FIG00003476	ff	atgtccgagagcgaagaaggcgcagagcgcacagaacaaccaacagacaaacgcctgcgcgaagcccgcgaacagggcaacatcccgcattcgcgggaactggcgacggcggcggtgttcagcgccggcgtcttcgccctgatgggcctgtccacctccatgaccgccggtgcggtggcctggctgaagcaggcgctgcgcccggacctgtcgatgcgcgcacatccggaggccatgttcggccatttcggcgagctgctgctgagcctgctctgggtggtgctgccgctggtcggcatctgcttcgccgccagcttcgccgcgccggtgctgatgggcaccctgcgcttctccggccaggcgctgatccccaagttcgaccggctcaacccgatggcc…	MSESEEGAERTEQPTDKRLREAREQGNIPHSRELATAAVFSAGVFALMGLSTSMTAGAVAWLKQALRPDLSMRAHPEAMFGHFGELLLSLLWVVLPLVGICFAASFAAPVLMGTLRFSGQALIPKFDRLNPMAGLSRMYGAETIAELLKSILRMGFVGGAALLCLWGSVDFLRGLLLQPLEQAIGHGLGFTLRLLLYTAGALALLAAIDAPYQKWNYIRKLKMTREEVRREMKESDGSPEVKGRIRQMQMQMSQRRMMEAVPKADVVVVNPTHYAVALKYESGRMRAPTVVAKGVDEIAFRIREVGEQHRVAVISAPPLARALYREGELGKEIPVRLYSAVAQVLSYVYQLRAWRSGPMPPLPPLEVDEFAPGSQP
gi|348022659|gb|AGHY01002047.1|	fig|487527.6.peg.552	peg	gi|348022659|gb|AGHY01002047.1|_663_322	663	322	-	Pterin-4-alpha-carbinolamine dehydratase (EC 4.2.1.96)		FIG00004933	icw(1);YhgI,_YhgH isu;COG1565 isu;Pterin_carbinolamine_dehydratase	atgaacgacctgatcccgctcgcccaggcccactgctcgccctgcaagggcagcgagtacaaactgacccaggcgcgcctggccgaactgctgccgcaggtgcccgggtgggaagtcgtcgagaacggcaacgcgatcagccgcaccttccgcttccccgactactaccgcaccctggccttcgtcaacgcgctggcctggatcgcgcaccgcgaggaccaccaccccgacctgggcgtgcactacgaccgcgtggtggtgcgctattccacccacgacgtcggtggcctcagcgaaaacgacttcatctgcgccgccaaggcctccgccctttcggaatga	MNDLIPLAQAHCSPCKGSEYKLTQARLAELLPQVPGWEVVENGNAISRTFRFPDYYRTLAFVNALAWIAHREDHHPDLGVHYDRVVVRYSTHDVGGLSENDFICAAKASALSE
gi|348022659|gb|AGHY01002047.1|	fig|487527.6.peg.553	peg	gi|348022659|gb|AGHY01002047.1|_750_1226	750	1226	+	NfuA Fe-S protein maturation		FIG00004282	isu;YhgI,_YhgH isu;Biotin_biosynthesis_Experimental	atgatccagatctcagacaacgcacaggcccatttccgcaagttgctcgaacgcgaggccgtgcccggcatgggcgtgcgcctgagcgcggtcgatgccggcaccccgcgtgccgatgcgcggctggagttcgccgagccggcggacctggccggcgacgagtgggcgatcgactgcgccggcttcaccttgtacgtggcggccgacagcgtcgcctggctcgacggcgcggaaatcgactacgtcacccagggcaccggccagcagctcaccatcaaggcgccgaagatcaagggcgaagcaccgggcgaagcggcctcgctggtggagcgggtgcgctgggttggtggagaacgaggtcaatccgcaactggcccagcacggcggccgcgtggcggt…	MIQISDNAQAHFRKLLEREAVPGMGVRLSAVDAGTPRADARLEFAEPADLAGDEWAIDCAGFTLYVAADSVAWLDGAEIDYVTQGTGQQLTIKAPKIKGEAPGEAASLVERVRWVGGERGQSATGPARRPRGGAGSVRPMAWCCCASAAAATAAAWPT
gi|348022663|gb|AGHY01002045.1|	fig|487527.6.peg.554	peg	gi|348022663|gb|AGHY01002045.1|_134_712	134	712	+	hypothetical protein				gtgatcgaccgtcagcagggcgggcgcgtctattacctcaacaccctgcggttcgcgctgcacgaacagttcgtgcgccagcgcctggcgccacgcatgggcaaggccgcactgaaggcgccaggaccgcgagccgcagcgacgcttcctgttcggcaccctgagctggcagcgggatctgccgggctacacctacgaattctgggagggcgaccgcctcaccgcgcccttgctgcagcagaccgacgcggccttgcgcgcctcgttctacgacacgctgcgcttcaagaccaactccacgctgcacgaacaggtggccaagtccgccggcttggccttcgtgacccaggaagcgctgctgcgcgagcagcgcttcctgccgctgaacaccggtcatgc…	MIDRQQGGRVYYLNTLRFALHEQFVRQRLAPRMGKAALKAPGPRAAATLPVRHPELAAGSAGLHLRILGGRPPHRALAAADRRGLARLVLRHAALQDQLHAARTGGQVRRLGLRDPGSAAARAALPAAEHRSCRGAAAYRALGGAVPHAVAARHPGAGRGADRAGAGRRPGHAASIHAAVARQPAGQGLGHS
gi|348022667|gb|AGHY01002043.1|	fig|487527.6.peg.555	peg	gi|348022667|gb|AGHY01002043.1|_229_1608	229	1608	+	tRNA-i(6)A37 methylthiotransferase		FIG00108342	isu;Methylthiotransferases	gtgcgcggcaagctgtacatcaagacccacggttgccagatgaacgagtacgactcggccaagatggccgacgtgctcgccgcgtccgaaggtctggaactgaccgacaaccccgaagaagcggacgtggtcctggtcaacacctgctcgatccgcgagaaggcgcaggagaaggtgttcagccagctcggccgctggaaggcgctgaaggccggcggcaagccggtgatcatcggcgttggcggctgcgtggcgtcgcaggaaggcgaggccatcgtcaagcgcgcgccctacgtggacctggtgttcggcccgcagaccctgcaccggctgccggagctgatccgcgcgcggcgcgaatcgggcaagtcgcaggtggacatcagcttccccgaagtc…	MRGKLYIKTHGCQMNEYDSAKMADVLAASEGLELTDNPEEADVVLVNTCSIREKAQEKVFSQLGRWKALKAGGKPVIIGVGGCVASQEGEAIVKRAPYVDLVFGPQTLHRLPELIRARRESGKSQVDISFPEVEKFDRLPEPRAEGPSAFVSIMEGCSKYCSFCVVPYTRGEEISRPFEDVLVEVAQLAAQGVREINLLGQNVNAYRGPYADAEAGEEAQHADLGLLIRSIAQIEGIGRIRFTTSHPLEFSDSLVEAYRDVPQLANYLHLPVQAGSDRILSAMKRGYTALEFKQKIRKLRAVRPDISISSDFIVGFPGESDADFDKTMKLIEDVGFDQSFSFIYSRRPGTPAADLEDDTPEAVKHARLARLQAHINAHAQQISQGMIGSVQTVLVEGPS…
gi|348022669|gb|AGHY01002042.1|	fig|487527.6.peg.556	peg	gi|348022669|gb|AGHY01002042.1|_41_223	41	223	+	hypothetical protein				ttgttccgggccacctgtgcggcggcgcgcagcgccgggctgacccggatcgacgccagcatcgccgccgacaatgcgctcgggcaggcgtactacgacgccgtcggctttcgtacctatcgcgagccgccaggcctggtgtgcaaggtctacgtgctcgacggcgccacgaccgacggctga	MFRATCAAARSAGLTRIDASIAADNALGQAYYDAVGFRTYREPPGLVCKVYVLDGATTDG
gi|348022673|gb|AGHY01002040.1|	fig|487527.6.peg.557	peg	gi|348022673|gb|AGHY01002040.1|_480_238	480	238	-	hypothetical protein				gtgcgcgagatgatgttctgggtgccgcagaccgggtcgatcggcgtcggcgtgtcgatcatgagctacaaccatcgcgtgcatttcggcctgatcggcgatgcgcggctgattcccgatccggacgcggtgatgcggcgggtcggcgccgaattcgagaagctgctgtacctggcgctgatgagcgattgggagcagccgctgcgcgccgccgacgccgagaccctgctgccgtcttcctga	MREMMFWVPQTGSIGVGVSIMSYNHRVHFGLIGDARLIPDPDAVMRRVGAEFEKLLYLALMSDWEQPLRAADAETLLPSS
gi|348022675|gb|AGHY01002039.1|	fig|487527.6.peg.558	peg	gi|348022675|gb|AGHY01002039.1|_26_229	26	229	+	FIG01111989: hypothetical protein		FIG01111987	ff	gtggtgatcggcggcatggcggcgctgcggccagtgccgttgccggcctcgttcgtgcggctggaattgccggcggcgatcgcgctggcggtggtgctgtacccgatgctgcgcggcgacatgcggctgagccgcggcgagggcgcggtgctgttggtggcgttcctggcgtgggtggggctggagctggcgttggtggcgtga	MVIGGMAALRPVPLPASFVRLELPAAIALAVVLYPMLRGDMRLSRGEGAVLLVAFLAWVGLELALVA
gi|348022677|gb|AGHY01002038.1|	fig|487527.6.peg.559	peg	gi|348022677|gb|AGHY01002038.1|_630_151	630	151	-	Hydroxyacylglutathione hydrolase (EC 3.1.2.6)		FIG00000013	isu;Glutathione:_Non-redox_reactions isu;Methylglyoxal_Metabolism	gtgctggactggcagttcgataccctggcggtccccggccacacccgctcgcatctggcgtacgtcggccagggccacctgttcagcggcgatacgctgttcagcctgggctgtgggcgcatgttcgaaggtacgccctcccagatgttgggttcgctgcagcgcctgtccgccctcccggggcagacgctggtctgctgcggacacgaatacaccttggccaatgcggcattcgccgtcacggtcgatcccaccaacgctgccctgcggcagcgccatcaggaagcccaggccatgcgtcatgctgcccgccccaccgttcccgtcacactcgccagcgaactggcgaccaatccgttcctgcgcaccgcctcggcggcgatccagcaggcgatcggc…	MLDWQFDTLAVPGHTRSHLAYVGQGHLFSGDTLFSLGCGRMFEGTPSQMLGSLQRLSALPGQTLVCCGHEYTLANAAFAVTVDPTNAALRQRHQEAQAMRHAARPTVPVTLASELATNPFLRTASAAIQQAIGARLGRGVSDEVEVFAELRRWKDDFRA
gi|348022683|gb|AGHY01002035.1|	fig|487527.6.peg.560	peg	gi|348022683|gb|AGHY01002035.1|_856_35	856	35	-	Cyclohexadienyl dehydrogenase (EC 1.3.1.12)(EC 1.3.1.43)		FIG00018141	isu;Phenylalanine_and_Tyrosine_Branches_from_Chorismate	atgctggcctcgcaggcggaggtggccggcctgcacccgatgaccgcgccgccgaagtcgccgacgctcaagggccgcgtgctggtggtgtgcgaagcgcgggtgacgcagtggcagccctggctgcagcagctgtacgcggcgctggaaggcgagtgcgtgcgcaccacgcccgagcaccacgaccgggtgatggcgctggtacaggcgatggtccacgccacccatctggcccaggccggagtgctgcgcgagcatgcgccggcactggggccgctgcaggccctgctgccgtaccgctcggcctcgttcgagttggacaccgcgatcatcgcgcgcatcctggccttgaatccggccatctacgaagacatccagttcggcaatccgcatgtcggc…	MLASQAEVAGLHPMTAPPKSPTLKGRVLVVCEARVTQWQPWLQQLYAALEGECVRTTPEHHDRVMALVQAMVHATHLAQAGVLREHAPALGPLQALLPYRSASFELDTAIIARILALNPAIYEDIQFGNPHVGDVLDGLIAQLSRLRAQVGRGDDAARAQFRAEFLDANRQALGEAAIAQGNYSYERVGYLLADLTEQSTLSVYLPEDRAGSLRALLHVFERHGVNLASIHSSRTQAGELHFRLGFDPASDAAAVRAAAAEIDASGIGRVLAG
gi|348022685|gb|AGHY01002034.1|	fig|487527.6.peg.561	peg	gi|348022685|gb|AGHY01002034.1|_712_11	712	11	-	transposase IS116/IS110/IS902				atggccgccgatcgtccgcggaacctggccaaggcccttggcctgcaggccaagaccgacgccctggacgcgcgcctgttggccatcgccgcccagcacattccggccacgcccacagccgtaccgcccgagcatcttcagtccctgcgcgaacggctggatctacgtgacaccctggtcggccagcgtgatgcccatcggcggcggctggagcacatcaccagccccgaggtgcaaggccactgccaagaggtgatcgccctactgaaccagaagatccaggctttgacgcggcagatcgagcagcaggctacgacctgctccacgctgccgaaggtgcccgtactcggcgcaatcctgcgcgcggtcctggccgcacggctgccggagctgggcaag…	MAADRPRNLAKALGLQAKTDALDARLLAIAAQHIPATPTAVPPEHLQSLRERLDLRDTLVGQRDAHRRRLEHITSPEVQGHCQEVIALLNQKIQALTRQIEQQATTCSTLPKVPVLGAILRAVLAARLPELGKLPPRKLAALVGLAPFNRDSGRWQGQRRIKGGRADVRRVLYMASWASIRAKSPLANTYARLRAAGKPAKVAIVACMHKFLRWLNAIARDQATYAPPAIAAA
gi|348022687|gb|AGHY01002033.1|	fig|487527.6.peg.562	peg	gi|348022687|gb|AGHY01002033.1|_13_150	13	150	+	hypothetical protein				gtgcacgcctggttcaccgaccgcgcgccgccggccgagctggccgcggtgctggacgcggccggcacccgggtgttcgtcgccgagggcgatgctgccgatccgggcgcgccggacctggacgtggctgcgaattga	MHAWFTDRAPPAELAAVLDAAGTRVFVAEGDAADPGAPDLDVAAN
gi|348022693|gb|AGHY01002030.1|	fig|487527.6.peg.563	peg	gi|348022693|gb|AGHY01002030.1|_1576_482	1576	482	-	Urocanate hydratase (EC 4.2.1.49)		FIG00094176	icw(1);Experimental_-_Histidine_Degradation	atgacccgcctcgacgccacccgccgcatccacgcccccaccggcagcaccctcaccgccaagagttggctgaccgaagcgccgttgcgcatgctgatgaacaacctgcatccggacgtggccgagcgcccgcaggaactggtggtgtacggcggcatcggccgcgccgcacgcgactgggagagcttcgacgccatcgtcgagacgcttaagcgcctggacgacgaccagaccctgctggtgcagtcgggcaagccagtgggcgtgttccgcacccacgccgacgcgccgcgcgtgctgatcgccaactccaacctggtgccgcgctgggccaactgggaccacttcaacgaactggacaagaaaggcctggccatgtacggccagatgaccgccggc…	MTRLDATRRIHAPTGSTLTAKSWLTEAPLRMLMNNLHPDVAERPQELVVYGGIGRAARDWESFDAIVETLKRLDDDQTLLVQSGKPVGVFRTHADAPRVLIANSNLVPRWANWDHFNELDKKGLAMYGQMTAGSWIYIGAQGIVQGTYETFVEMGRQHLRRRSVRQVAVHRWPGRHGRRAAAGRGDGRRLVPGGGVPQEQHRHAPAHRLPGHLDRFAGRGAAPDRRSLRGEDAALGRPARQRRRRARRTAGARGQAGPADRPDLRARPGQRLTAPGLDGRAVGRQARLRPQGGGTGRACLDGQPHPRHARLPRVGRADRGLRQQPAADGAGRRRGQRLRFPRLRAGLHPPGCSAAASARSAGRR
gi|348022693|gb|AGHY01002030.1|	fig|487527.6.peg.564	peg	gi|348022693|gb|AGHY01002030.1|_1816_1625	1816	1625	-	N-formylglutamate deformylase (EC 3.5.1.68)		FIG00001559	isu;Experimental_-_Histidine_Degradation	gtgcacgcgatccagatggaactggcctgccgcggctacatgcacgagccggacacggtcagccccgccaattggccctcgccctggcaacccgaccacgccgcgccgctgcgcgcggtgctgcagcaggtactgcaggcctgtctcgacttcgcccacagccccgccgcgtccggccgcgccgccgactga	MHAIQMELACRGYMHEPDTVSPANWPSPWQPDHAAPLRAVLQQVLQACLDFAHSPAASGRAAD
gi|348022695|gb|AGHY01002029.1|	fig|487527.6.peg.565	peg	gi|348022695|gb|AGHY01002029.1|_423_1190	423	1190	+	5-nucleotidase SurE (EC 3.1.3.5)		FIG00000480	isu;Housecleaning_nucleoside_triphosphate_pyrophosphatases	gtgagcaacgacgacggcgtcgacgcccccggcattcgcatgctggccgagcagttgcgcggcgccggccacgaagtgacggtggtcgcacccgaccgcgaccggtccggcgccagcaattcgctgaccctggatctgccgatccggctcaagcgcatcgaccattacacctgcagcgtcgccggcacgccgaccgactgcgtgcatctggcgctcaccggcatgctggagttcgacccggacatcgtggtctccggcatcaacaattccgccaacctcggcgatgacgtgatctattccggcaccgtctcggcggcgatggaaggccgcttcctcggcctgcctgcagtagcggtgtcgctggtcacccacaaccacgaacccaagcatttccagacc…	MSNDDGVDAPGIRMLAEQLRGAGHEVTVVAPDRDRSGASNSLTLDLPIRLKRIDHYTCSVAGTPTDCVHLALTGMLEFDPDIVVSGINNSANLGDDVIYSGTVSAAMEGRFLGLPAVAVSLVTHNHEPKHFQTAARAAVEIVARLKADPLPADTILNVNVPDLPWQEIKGFEVTRLGNRHRSEPCLPQTDPRGGTVYWIGPAGREQDAGPGTDFHAVRTGFISITPIQVDLTRYQALEKVASWVGGLTAALDRPA
gi|348022695|gb|AGHY01002029.1|	fig|487527.6.peg.566	peg	gi|348022695|gb|AGHY01002029.1|_1302_1439	1302	1439	+	Protein-L-isoaspartate O-methyltransferase (EC 2.1.1.77)		FIG00069725	icw(1);Protein-L-isoaspartate_O-methyltransferase icw(1);Ton_and_Tol_transport_systems icw(1);Lanthionine_Synthetases	gtgctcaacgcggtacgcaccgtgccgcggcacctgttcatcgacgaggcactggcctcgcgcgcctacgaggacaccgcgctggccgatcggccacggccagaccatctcgcaaccgtgggtgggtggcgcgcatga	MLNAVRTVPRHLFIDEALASRAYEDTALADRPRPDHLATVGGWRA
gi|348022695|gb|AGHY01002029.1|	fig|487527.6.peg.567	peg	gi|348022695|gb|AGHY01002029.1|_1473_1892	1473	1892	+	Protein-L-isoaspartate O-methyltransferase (EC 2.1.1.77)		FIG00069725	icw(1);Protein-L-isoaspartate_O-methyltransferase icw(1);Ton_and_Tol_transport_systems icw(1);Lanthionine_Synthetases	gtgctggaagtcggcaccggctccggctaccaggcggcgatcctggccgcactgggcctggaggtgcacactgtcgagcgcatcggcgacctgctgcggcaggcgcgcaagcgcttccgccagctcggcatgaacgtgcgcagcaagcacgacgacggccgcatcggctggcccgagcacggtcccttcgatgcgatcgtggtcaccgccgcggcgccggcgctggtcgatgccctgatcgagcaactggcgccgggcggatgcctggtggcgccggtccggcggcccgtccgcgcaatcgctgatccgcctgcgccgcgctgccgacggccagatcgaacaagacgtcctggcgccggtgaccttcgtcccgttgctgtcgggcatgctggattgacc…	MLEVGTGSGYQAAILAALGLEVHTVERIGDLLRQARKRFRQLGMNVRSKHDDGRIGWPEHGPFDAIVVTAAAPALVDALIEQLAPGGCLVAPVRRPVRAIADPPAPRCRRPDRTRRPGAGDLRPVAVGHAGLTSRSRTG
gi|348022699|gb|AGHY01002027.1|	fig|487527.6.peg.568	peg	gi|348022699|gb|AGHY01002027.1|_1572_463	1572	463	-	Putative outer membrane or secreted lipoprotein			ff	atgcgccagatcctgttcgttcccttgttgctgaccctggttgcctgcggccgcgaccgcaccgaacccgccacgcagccgcccggcgcggccgagagcgccaagacccgggtgctggaagccggcgccaaggcgctgcaggacgatggcccggccgcggtgctggacatccacctggtcggcttccatcccatgcgcgaccacccgcaccagcagatggaagcccaccacttctgccgccaggtcaacgaggacttcgcccagtgcgccctgttcgacggcgacaccgcgcaggccaacctcaccggcgtggagtacatgatttccgaggtgctgttccagcggctgccgccggaggagcgccgctactggcatccgcacaacggcgagatcctgtcc…	MRQILFVPLLLTLVACGRDRTEPATQPPGAAESAKTRVLEAGAKALQDDGPAAVLDIHLVGFHPMRDHPHQQMEAHHFCRQVNEDFAQCALFDGDTAQANLTGVEYMISEVLFQRLPPEERRYWHPHNGEILSGQLSAPGLPLTAEKALMRSKLNSYGKTWHTWHSRRGAEARRCPAPGRAHAGLVVQPRRRTAAGPAGPPRRHRPAPQRRAARRSPGPDAAGQAAAGRGPAARRVSQGHADSWGGGGGDGGTVGAREAVRRATSFRPKIPPRSGLMPRAAGPAAVPASALRPVFLASGHQGVQRSPAKSARRWVSVPSCHAMSRITQRSSCRTSTTVSVHCRLSTARRARTRAVSPLTRAVVETSAVG
gi|348022703|gb|AGHY01002025.1|	fig|487527.6.peg.569	peg	gi|348022703|gb|AGHY01002025.1|_11_478	11	478	+	FIG01212761: hypothetical protein		FIG01212759	ff	gtggccgccggctcgcgcatgcgcggccaggccgacttcggctgggacgacgacaagcacgcccgcaagggcggcaagcccggcggagtccgacgccggcgcatgagcagcccgcgtccccggcagtccgggggcgacccggaccctgcccgcactgcaaggccaccatcctcgaaagcgccagcggtctgcccggcgtgcaagcaccatctgcgcttcgattcggcggtgctgcagcaatcggcgccatcggcgctggtaccgctgcgggtggagggcagcatccgccatccggacgacggcagcgcctgggaatacaccgtgctggtcagcatccgcaacggccgcggcgaggagatcaagcgccaactggtcggcgtcggcgccatgctcgacggc…	MAAGSRMRGQADFGWDDDKHARKGGKPGGVRRRRMSSPRPRQSGGDPDPARTARPPSSKAPAVCPACKHHLRFDSAVLQQSAPSALVPLRVEGSIRHPDDGSAWEYTVLVSIRNGRGEEIKRQLVGVGAMLDGEERSFTLSVEATPVRGGKRGRH
gi|348022705|gb|AGHY01002024.1|	fig|487527.6.peg.570	peg	gi|348022705|gb|AGHY01002024.1|_39_1397	39	1397	+	Ribosomal protein S12p Asp88 (E. coli) methylthiotransferase		FIG01266244	isu;Ribosomal_protein_S12p_Asp_methylthiotransferase isu;Methylthiotransferases	gtggagggttacgcgatcgtgcccagctacgacgcggccgacgtggtggtggtcaacacctgcggcttcatcgattcggcagtggccgagtcgatggaggcgatcggcgaggccatggccgagaacggcaaggtcatcgtcaccggctgcctgggcaagcgttcggagcagatccgcgcggcctatccggacgtgctggcggtgtccggcccgcaggactaccagagcgtgatggaagcggtgcatgcggcgctgccgccgcgccacgacccgttcgtggacctgctgccgcgtgcgcggggcgccgaggacgacatcggggtcaagctgacgccgcggcattatgcctacctgaagatttccgaaggctgcaatcaccgttgcagcttctgcatcatt…	MEGYAIVPSYDAADVVVVNTCGFIDSAVAESMEAIGEAMAENGKVIVTGCLGKRSEQIRAAYPDVLAVSGPQDYQSVMEAVHAALPPRHDPFVDLLPRARGAEDDIGVKLTPRHYAYLKISEGCNHRCSFCIIPSMRGDLVSRPVDEVLREAERLVKGGVRELLVVSQDTSAYGVDLKYAEREWRGRAYQTRMKALCEGLSELGAWARLHYVYPYPHVDDVIPLMAEGKLLPYLDIPFQHASPRILKLMKRPGAVERTLERVQRWRALCPEITLRSTFIVGFPGETDAEFEQLLEFLDAAQLDRVGAFAYSPVEGASANALPDPVPEELKQERLARFMERQAAISAARLEAKIGSVQECLVDLLEDGIAVARSKADAPEIDGLVHIQNGGELGLKPGDL…
gi|348022709|gb|AGHY01002022.1|	fig|487527.6.peg.571	peg	gi|348022709|gb|AGHY01002022.1|_13_423	13	423	+	Transglutaminase-like enzymes, putative cysteine proteases		FIG01055536	ff	gtgcgcctgagctacagcgagaagctggagacgctggaggtgctgtccgcctacacgctgaccccggacgggctgcgccacgacgtgccggccgacaagatctacacccaggagagctattccagcgcggcggcggcgatgtacgccgaccgcaaggtcaaggtggtggtgtttcccaacctgatgcccggcgcgcgcctggtgtaccgggtgcgccgtacccagaacgtgccgtacttccccggctacttcagcctgtgggagaccttcagcgtgttctcccagtacgacgacgccacggtgaccctggtggcgccgcggcgcttgcagatgcacctgtacacgcgcggcgtgcagggcagcaacacgccgcagatcgacggcgagcaggcgcgctgg…	MRLSYSEKLETLEVLSAYTLTPDGLRHDVPADKIYTQESYSSAAAAMYADRKVKVVVFPNLMPGARLVYRVRRTQNVPYFPGYFSLWETFSVFSQYDDATVTLVAPRRLQMHLYTRGVQGSNTPQIDGEQARWQWH
gi|348022711|gb|AGHY01002021.1|	fig|487527.6.peg.572	peg	gi|348022711|gb|AGHY01002021.1|_165_497	165	497	+	Thioredoxin			isu;CBSS-315749.4.peg.3658 isu;Glycine_reductase,_sarcosine_reductase_and_betaine_reductase	atgctcaccaccatcaccgtctccagcgccgaacagttcgccgatgcgcttgccgcgcacccgcgcgtgctggccgatttcaacaaggacaactgccctggctgccgcatgctcgacaagtcgctggagcgtttcgccgagagcgacacggcgcagggcgtgaccctgctcaaggtgaagatggaagacgtgggcgaggacttcttccgcgctcagggcctgcgccagacgccgacgctgatgctgttccgccaaggcgaggaagtggcgcgcgtgcccggcttcgtgccgccggccaagatcgacgaagcggtccgcacgcatctgggttga	MLTTITVSSAEQFADALAAHPRVLADFNKDNCPGCRMLDKSLERFAESDTAQGVTLLKVKMEDVGEDFFRAQGLRQTPTLMLFRQGEEVARVPGFVPPAKIDEAVRTHLG
gi|348022715|gb|AGHY01002019.1|	fig|487527.6.peg.573	peg	gi|348022715|gb|AGHY01002019.1|_250_831	250	831	+	Formyltetrahydrofolate deformylase (EC 3.5.1.10)		FIG00000507	isu;One-carbon_metabolism_by_tetrahydropterines	gtgctggtcagcaagcagggccactgcctcaacgacctgctgttccgcgcgcacagccggcaactgcgggtggacatcgccgcggtggcctccaaccatcccgatttcgccgcgctggccggctcctacggcgtgccgttccaccacctgccggtgagcgcggccaatcgcgccgaacaggaagcgcagctgctggcgctggtcgagcgcgaacgcatcgacctggtggtgctggcacgctacatgcagatcctgtcgccgacgctgtgcgcggcactggccgggcgcgcgatcaacatccaccacagcttcctgcccagcttcaagggcgcgcagccgtaccaccaggcgcacgcccgcggggtcaagatcatcggcgccaccgcgcactacgtcacc…	MLVSKQGHCLNDLLFRAHSRQLRVDIAAVASNHPDFAALAGSYGVPFHHLPVSAANRAEQEAQLLALVERERIDLVVLARYMQILSPTLCAALAGRAINIHHSFLPSFKGAQPYHQAHARGVKIIGATAHYVTGDLDEGPIIEQDVARVDHAMTPRELVRLGSDTESQVLARAVRRHVEHRILLNGHRTVVFR
gi|348022717|gb|AGHY01002018.1|	fig|487527.6.peg.574	peg	gi|348022717|gb|AGHY01002018.1|_17_190	17	190	+	Hydrogen peroxide-inducible genes activator		FIG00031825	isu;Oxidative_stress isu;LysR-family_proteins_in_Salmonella_enterica_Typhimurium isu;LysR-family_proteins_in_Escherichia_coli isu;Thioredoxin-disulfide_reductase	atgaacctgcgtgatctgaaatacctggtggcgctggccgatcacaagcatttcgggcgcgcccgccgcggcctgcttcgtcagccagccgacgctgtccacgcagatcaagaagctcgaggacgaactgggcgtgcctctggtcgaacgcgccccgcgcaaaggtcatgctga	MNLRDLKYLVALADHKHFGRARRGLLRQPADAVHADQEARGRTGRASGRTRPAQRSC
gi|348022719|gb|AGHY01002017.1|	fig|487527.6.peg.575	peg	gi|348022719|gb|AGHY01002017.1|_65_691	65	691	+	diguanylate cyclase/phosphodiesterase (GGDEF & EAL domains) with PAS/PAC sensor(s)		FIG00024425	idu(4);Bacterial_hemoglobins	atggccgaggaatgcggcctgatcgacgagctcggacattgggtcctgcgcgaggcctgccggcagatggccgactggcgcctgcgcggcatcccggtgccgcgcgtggcggtgaacctgtcggccaacaatttcgccgatccgcagctgccggcgcgggtcgaaggcctgctcgccgccgccggcctgcagccggccgacctggccctggagatgaccgagagcgtcatgctctccaacaccagcgcggtgctggccaacctgcgccagctgcaggccggcggcgtgctgctgtcgctggacgatttcggcaccggctattccagccttagccatctgcaccagttgccggtcaacgaactgaagctggacatgagcttcgtcagcgacctggagcac…	MAEECGLIDELGHWVLREACRQMADWRLRGIPVPRVAVNLSANNFADPQLPARVEGLLAAAGLQPADLALEMTESVMLSNTSAVLANLRQLQAGGVLLSLDDFGTGYSSLSHLHQLPVNELKLDMSFVSDLEHCQTSRALTTSVLRIGETLGLHTVAEGVETEAQCAFLARLGCRVLQGFLFAPALTPAALEHWLQGRASAQPTSAQT
gi|348022727|gb|AGHY01002013.1|	fig|487527.6.peg.576	peg	gi|348022727|gb|AGHY01002013.1|_150_623	150	623	+	hypothetical protein				gtgtacgcgtgcacggtccgcgagggcggccgcgtcgacggccgcgtgctgggcgcactgggcatcgtgttgcgatgggacgcgctggcgcagacgatcgtgcggcgcacgccgctgtccgaatccgaacggggccgcagccgggtctgcatcgtcgacgcacgcggcgaaatgctggacgactcggccggacgcatgctgcaggaccggctcgacttcgacggccgcgacgccttgttcaagcagccgcgcagtgcccctgatgatcgacctcgagggccgatcgccctgcatcgcgcatgtcgccgcgccgagccaagaacctaccgcaccggctggcactcgccgatcctgcaggtgctgtacaccgcgcgccccaccgcgtcctgcgcaaaagcg…	MYACTVREGGRVDGRVLGALGIVLRWDALAQTIVRRTPLSESERGRSRVCIVDARGEMLDDSAGRMLQDRLDFDGRDALFKQPRSAPDDRPRGPIALHRACRRAEPRTYRTGWHSPILQVLYTARPTASCAKAAVGHRAPRGVSAWLRMRRHGASRQ
gi|348022729|gb|AGHY01002012.1|	fig|487527.6.peg.577	peg	gi|348022729|gb|AGHY01002012.1|_593_240	593	240	-	RNA polymerase sigma-54 factor RpoN		FIG00006092	idu(2);Transcription_initiation,_bacterial_sigma_factors	atgttcgcggaacacggcccggtgctgcgcggcttcttcgtacgccgcggcgcacgcgaggacgccgaggacatggtgcaggagacctatctgcggctgctgcgcgcgcatcggcagcagggcgaggccatcgccaatcccgaagcctatctgtacaccgtcgcgcagaacctggcgcgcgacaggccgcgcgtcgccgccaggcgccgctgcgcatcgacgagatggagcagttctcgcaattgctggcggcgggagacgacgtggaagacagcgcacaccggcggcagcgccagcagcacctgcaggccctgctcgccgacctgcccgcgcgcacccgcgcggtgctggtga	MFAEHGPVLRGFFVRRGAREDAEDMVQETYLRLLRAHRQQGEAIANPEAYLYTVAQNLARDRPRVAARRRCASTRWSSSRNCWRRETTWKTAHTGGSASSTCRPCSPTCPRAPARCW
gi|348022731|gb|AGHY01002011.1|	fig|487527.6.peg.578	peg	gi|348022731|gb|AGHY01002011.1|_727_440	727	440	-	filamentous haemagglutinin				ttgctgtgctgcaccgtcacctggacctcgctgccgctgtacgcgcaggtcgcgccggtcgccaatccggacggacgccagcccggccagcaggccgcggccaacggcgtgccagtggtcgacatcgtcgcccccaacgcgcgcggcgtttcgcacaaccgctactcgcgcttcgatgtcggcagcaacggcctgatcctcaacaacagcgcgcagatctccaagaccgagcttggcggctacatcgccggcaacgacaacctgaagaacagcggcgcggcacgctga	MLCCTVTWTSLPLYAQVAPVANPDGRQPGQQAAANGVPVVDIVAPNARGVSHNRYSRFDVGSNGLILNNSAQISKTELGGYIAGNDNLKNSGAAR
gi|348022731|gb|AGHY01002011.1|	fig|487527.6.peg.579	peg	gi|348022731|gb|AGHY01002011.1|_2090_882	2090	882	-	Hemolysin activator protein precursor		FIG00001420	ff	gtgcgcgtgcagtcggcggacggccgcgtgttctggcgcggtgcgctgccgctgcggccgggcgatgtgctggacctgcgcgcgatcgaacagggcgtggagcagttcaagcgggtgccgtcgcaggacgccaagatcgatatcgccccgggcgagcagccgggcgaatcggacctgctgatcaccgtgcagcgcagcaagcgctggcgcgcggtgctcaacgccgacgactccggcgtgcaggcgaccggccgctaccagggcggcgtcgacttcgccctggatgcgccgctgggcatcaacgacctgctctcgatcggctacaaccacgacctggtcgatgacggcgccgcccgcggcacgcgcggcaacagcctgtcctacagcgtgccgtggggc…	MRVQSADGRVFWRGALPLRPGDVLDLRAIEQGVEQFKRVPSQDAKIDIAPGEQPGESDLLITVQRSKRWRAVLNADDSGVQATGRYQGGVDFALDAPLGINDLLSIGYNHDLVDDGAARGTRGNSLSYSVPWGWWTFSLSLSSYRYHQQVDGFRQSFQSSGSSDSAQLDLQRVIHRTGTSKTTLGMVVAKRAARSYLDGVEIGIQRRHTTSAELYLSHRHYLGKLQLDTRLGHRRGTPWFDGQWTGYDPAVGFPGYRYGVTTLDVSAGLPFALGPVAMSWDSSLHAQTSPQLLLGSEFITLGGRYSVRGFDGERTLGAERGAYWRNTLNLPVQRLGITPYLGVDAGRIAGPSAAGPSRAQPGRRFRRRARCARWAQLGWLCRLGPARTARLPQARSRPT…
gi|348022739|gb|AGHY01002007.1|	fig|487527.6.peg.580	peg	gi|348022739|gb|AGHY01002007.1|_928_482	928	482	-	Cell division protein MraZ		FIG00000547	isu;Bacterial_Cytoskeleton	gtgtttcagggcgagaccgcaatcactgtggacgacaaggggcgtatggcggttcccaccgcgtaccgcgacctcgtcgcgcgcgtgagcggcaatcggctggtgctgacctacaacccgttcgaggccggctgcctgtggctgtatgcggagaaggagtgggagcgggtccgtgacgacgtcatggccaagcccaacacccagcgcgtggtgcgggtcctgcagcagaagctggtgggttcgtcggccgcgctggagctggatgccaacgcccgcatcaccattccgccgagccatcgcgccgcggtgggcattgaaaagagcgccgtgctgttgggcatgggcgacaagttcgaactgtggagcgagcaggctcatcgcgcactgatccagcagacg…	MFQGETAITVDDKGRMAVPTAYRDLVARVSGNRLVLTYNPFEAGCLWLYAEKEWERVRDDVMAKPNTQRVVRVLQQKLVGSSAALELDANARITIPPSHRAAVGIEKSAVLLGMGDKFELWSEQAHRALIQQTLSDEDLGDGLLDLKL
gi|348022741|gb|AGHY01002006.1|	fig|487527.6.peg.581	peg	gi|348022741|gb|AGHY01002006.1|_1215_601	1215	601	-	UDP-glucose 4-epimerase (EC 5.1.3.2)		FIG00022300	isu;Rhamnose_containing_glycans isu;CBSS-296591.1.peg.2330 isu;Lactose_and_Galactose_Uptake_and_Utilization isu;N-linked_Glycosylation_in_Bacteria isu;Lacto-N-Biose_I_and_Galacto-N-Biose_Metabolic_Pathway	gtgccgaccgacgagggcaagccggcggaaccctcgtcggtgtacgcgctgtccaagctggaccaagagcgcctgtgcctgatcgtcggccaggcctatgcgatcccgaccaccgcgttgcgcttcttcaacatctacggcacgcgccaggcgctgtccaatccctacaccggggtgctggcgatcttcgcggcgcggctgctcaaccgcaaaccgccggtgatcttcgaggacggcgcgcaacgccgcgatttcgtgcatgtcagcgacgtcgcccgtgcctgccgcctggcctacgaaagcgactccgccgcgggcctggcgttgaacatcggcagcggccaggcgatcagcatcaacgaggtggcgcagcgcatcgccgcggccatgggcatcgac…	MPTDEGKPAEPSSVYALSKLDQERLCLIVGQAYAIPTTALRFFNIYGTRQALSNPYTGVLAIFAARLLNRKPPVIFEDGAQRRDFVHVSDVARACRLAYESDSAAGLALNIGSGQAISINEVAQRIAAAMGIDDLPPQVSGNYRVGDIRHCFADISLARERIGYTPQVELQQGLGELVTWLREQTAADGIEAANAELARRGLQG
gi|348022743|gb|AGHY01002005.1|	fig|487527.6.peg.582	peg	gi|348022743|gb|AGHY01002005.1|_325_191	325	191	-	hypothetical protein				gtggtgaagaacggcacgaacaagttgtcgctggacggcaggccggcgccgttgcgcaggcgctatcgggcgtcgcgctgctgccggcaccttagcgccgcggtcaccagcagcatgcacaacaaaccgcgttga	MVKNGTNKLSLDGRPAPLRRRYRASRCCRHLSAAVTSSMHNKPR
gi|348022745|gb|AGHY01002004.1|	fig|487527.6.peg.583	peg	gi|348022745|gb|AGHY01002004.1|_412_131	412	131	-	Redox-sensing transcriptional regulator QorR		FIG00004266	ff	gtgctggtgctggtggcgctgcgcaagggcacccaccgtttcggcgacctgcgccgcagcctggaaggcgtcagcgagaagatgctgtcgcagaccctgcaggcgctggaggcggacggcctggtgcagcgcactgcctacccggtggtgccgccgcacgtggagtacgacctgaccccgctcggcgaggaagccgcggcgcacgtgcacgcgctggtggactggatcgagcgcaatatcggcgtgatcctgggtggcggcgcgccactggacgcggcctag	MLVLVALRKGTHRFGDLRRSLEGVSEKMLSQTLQALEADGLVQRTAYPVVPPHVEYDLTPLGEEAAAHVHALVDWIERNIGVILGGGAPLDAA
gi|348022751|gb|AGHY01002001.1|	fig|487527.6.peg.584	peg	gi|348022751|gb|AGHY01002001.1|_712_47	712	47	-	short-chain dehydrogenase/reductase SDR				gtggcgatcaactacctgccgcaggaggagtcggacgcacgcgaggtggtcgcgctgatccgcgcggccgggcgcaaggccgtggccattcccggcgacctgcgcgatgccgcgttctgcaagcaactggtcgtacaggcggtgcagcagctcggcggcctggagcatcctggtcaacaatgccgcgcgccagaccgcgcagaaatcgctgctggacatcgacgatcagggttggacgacaccctcaagaccaacctctacgcgctgttctggatcacccgcgcggcgctgccgcatctgccgtcgggcgcggcgatcatcaacaccacctcgatcgtcgccgacgacccgccggaatcgctactcgactacgccaccaccaagggcggcatcgtcagc…	MAINYLPQEESDAREVVALIRAAGRKAVAIPGDLRDAAFCKQLVVQAVQQLGGLEHPGQQCRAPDRAEIAAGHRRSGLDDTLKTNLYALFWITRAALPHLPSGAAIINTTSIVADDPPESLLDYATTKGGIVSFTKSLAKQLAPKGIPRQRGGARAVLDAAAAQRRAIHGQAQDLRRRRSHRPPRPAGGDRTESTCCWPRRNPASPPAACSAASAAVATWA
gi|348022755|gb|AGHY01001999.1|	fig|487527.6.peg.585	peg	gi|348022755|gb|AGHY01001999.1|_685_386	685	386	-	putative exported protein		FIG00978917	ff	atgaaaagtaacggcctgctcaagtggctgatgattcctgtcgtcgcgctgctggtcttccttggcatccacctcacctccgtgcgctcggacaagtccgccgcaggtgccggcaccgcgcagctcagcccggaggagatgaaggccctgggcatcgacggcgacacgcccgcgcgataccgtggccaccctggtcgcgcaggtcaagcaactgcgcggcgaactgcagaccgcggtaggcgagaacaagaaccagcgcgcggaaaacgagcgcctgcgccagcgcgacaactcgattga	MKSNGLLKWLMIPVVALLVFLGIHLTSVRSDKSAAGAGTAQLSPEEMKALGIDGDTPARYRGHPGRAGQATARRTADRGRREQEPARGKRAPAPARQLD
gi|348022761|gb|AGHY01001996.1|	fig|487527.6.peg.586	peg	gi|348022761|gb|AGHY01001996.1|_443_27	443	27	-	FIG01211504: hypothetical protein		FIG01211503	ff	ttggccgagcccgccgcttccggcgtctaccgcgtggccaaccgcgacctggacagcgtcgccgcgctggcccgcgacgccggcctgcggctgtgccggatcgacctgcacggctgcaccggcaaggccatgctgctgatgcggctggccgcgcaactggactttccgcccggcttcggccgcaactgggacgcgctcaccgatggcctgcgcgacctgtcctggctgccctcgccgcgcggctatgcgctgctgctggaggacgccggacagttgcagaccgtggcgcagccggcattcgacgtgctgctggagatcctcgacgacgtcgcccgcgagtgggcgcaggacggcgtcagcttcgtcgcgttcgtgggtggcagcgaggaaccggaagcg…	MAEPAASGVYRVANRDLDSVAALARDAGLRLCRIDLHGCTGKAMLLMRLAAQLDFPPGFGRNWDALTDGLRDLSWLPSPRGYALLLEDAGQLQTVAQPAFDVLLEILDDVAREWAQDGVSFVAFVGGSEEPEAPAESD
gi|348022765|gb|AGHY01001994.1|	fig|487527.6.peg.587	peg	gi|348022765|gb|AGHY01001994.1|_61_639	61	639	+	Cardiolipin synthetase (EC 2.7.8.-)		FIG00052605	idu(1);Glycerolipid_and_Glycerophospholipid_Metabolism_in_Bacteria idu(1);Cardiolipin_synthesis	gtggtcgcacccgcctccatccacggtggcggcgtcgccgcgcagctgctgcccagcgggccggcgtacccgttcgagaacgcgcgcgacacggtcaacgcgctcgtccatctggcgcggcggcgcatcgtcatggtcacgccgtacttcgtgccggacgaggccacgctcagcgcgctgcgcatcgccgcgctgtccggggtggacgtgcaactgatcctgtccgagagcaacaaccagcggctcaccgcctgggcgcaggaggcctactacgacgaactgctgcgcagcggagtcaagatcgcgctgtaccggccgtgcttcctgcacgccaagcacctgagcgtggacgaaggcatcgccctggtcggctcgatcaacctggacatccgctcgttc…	MVAPASIHGGGVAAQLLPSGPAYPFENARDTVNALVHLARRRIVMVTPYFVPDEATLSALRIAALSGVDVQLILSESNNQRLTAWAQEAYYDELLRSGVKIALYRPCFLHAKHLSVDEGIALVGSINLDIRSFALNAEVGMLCYSAAVVQRLRAVEADYLADARVLTLQDWRKRPAWRRSREGIARLADALM
gi|348022769|gb|AGHY01001992.1|	fig|487527.6.peg.588	peg	gi|348022769|gb|AGHY01001992.1|_45_1175	45	1175	+	Transcription accessory protein (S1 RNA-binding domain)		FIG00001712	isu;CBSS-243265.1.peg.198 isu;Cell_division-ribosomal_stress_proteins_cluster isu;Transcription_factors_bacterial	gtggtcgacgccaccggcaagctgctggcgaccgacaccatctacccgcacgagccgcgccggcagtgggaccagtcgctgcacacgctgcggcagctgtgcacccagcacggcgtcgagctgatcgcgatcggcaacggcaccgccagccgcgagaccgacaagctggccgcggacctgatcaagcagaacccgcagctgaagctggagaagatcgtggtcagcgaggccggcgcttcggtgtattcggcctccgagttcgccgccaaggagttcccgcagctcgacgtgtcgctacgcggtgcggtgtcgatcgcgcggcgcctgcaggatccgctggcggagctggtcaagatcgagcccaaggccatcggcgtgggccagtaccagcacgacgtc…	MVDATGKLLATDTIYPHEPRRQWDQSLHTLRQLCTQHGVELIAIGNGTASRETDKLAADLIKQNPQLKLEKIVVSEAGASVYSASEFAAKEFPQLDVSLRGAVSIARRLQDPLAELVKIEPKAIGVGQYQHDVDQYRLARALDARVEDCVNAVGVYVNTASAALLSRVSGLSSSVAENIVRHRDDNGPFKRRKDLLKVPRLGEKTFEQCAGFLRIADGEEPLDASAVHPEAYPVVERIGRRHRQADQGADRRRRLPARAQAGPVHRREVRPAHRARHPQGTGKARPRPASGVQGRAFRRGRGRHQRTSSRAWCWRVWSATSPRSARSSTSACTRTAWCTSPRSRTATSRIRATWSRPATSSRSRCWRWTWRASASR
gi|348022771|gb|AGHY01001991.1|	fig|487527.6.peg.589	peg	gi|348022771|gb|AGHY01001991.1|_942_223	942	223	-	L-alanine-DL-glutamate epimerase		FIG01257660	isu;Muconate_lactonizing_enzyme_family isu;Recycling_of_Peptidoglycan_Amino_Acids	atgaagatcaccgagatccgcctgggcatgctgcgcgtgccgctgaagaccccgttcaagaccgcgctgcgcaccgtgcaggcgatcgaggacgtggtggtcatggtccacaccgacgacggccggatcggccatggcagcgcaccggcgaccccgcccatcaccggcgatacccacggagcgatcatcgccgcgatcgaacgctgcctggcgccgcgcctgatcggcgaggacatggccgacctgcagcgcctgcgcggcctgatccagggcgcgctggaacacaacagcagcgccaaggcggcgctggagatcgccgtgcacgacctgtgggcgcagcagcatggtgcgccgctgtaccagctgcttggcggtggcacgccgcagctgaccaccgac…	MKITEIRLGMLRVPLKTPFKTALRTVQAIEDVVVMVHTDDGRIGHGSAPATPPITGDTHGAIIAAIERCLAPRLIGEDMADLQRLRGLIQGALEHNSSAKAALEIAVHDLWAQQHGAPLYQLLGGGTPQLTTDLTISVNAVDTMVADALSALARGFVALKIKIGTDLAEDIARVKAIHAAVGDRAQLRLDANQGWTPKQAVQAMHALERAGVTLELLEQPVKAGDVDGLQYVTERVQTR
gi|348022771|gb|AGHY01001991.1|	fig|487527.6.peg.590	peg	gi|348022771|gb|AGHY01001991.1|_1151_939	1151	939	-	probable exported protein STY2149				gtgatgctggtgatcggtcacgaggatggccagacctgggtgatccatgacgtggccggcgccagctaccgcgacgccgctggccggttgcagcgcgtgcgcctcaacggcgtgtcggtgaccccgctggagccgctgctgctcggcgacggcacgcccttcatcgaccgcatcacccgcatccagcgcctgcgcgcaccgaccaccgaatga	MMLVIGHEDGQTWVIHDVAGASYRDAAGRLQRVRLNGVSVTPLEPLLLGDGTPFIDRITRIQRLRAPTTE
gi|348022773|gb|AGHY01001990.1|	fig|487527.6.peg.591	peg	gi|348022773|gb|AGHY01001990.1|_21_503	21	503	+	putative exported protein				gtgctggtgcagtggagccacttcggcttctccaacccgtccgcgcacttcggcgacgtcgacggcaccctggtctacaacgcccaggacgtgagcaagtccagcgtcaacgtgaccctgccgctgtccggcctcaacagcttcaccgccaagttcgacgagcacctgaagagcgccgacttcttcgacgccgccaagttcccgactgccaccttcaagagcaccaaggtgacctcggccggcgccaacaagctgaccgtcgccggcgacctgaccatcaagggcacgaccaagccggtggtgctggcggtgaccctcaacggtgccggtccgcacccgatgaagaaggtgccggcgctgggcttcgacgccaccaccacgatcaagcgcagcgacttc…	MLVQWSHFGFSNPSAHFGDVDGTLVYNAQDVSKSSVNVTLPLSGLNSFTAKFDEHLKSADFFDAAKFPTATFKSTKVTSAGANKLTVAGDLTIKGTTKPVVLAVTLNGAGPHPMKKVPALGFDATTTIKRSDFGLGAYVPNVSDEVKIRITTEATLNAAK
gi|348022777|gb|AGHY01001988.1|	fig|487527.6.peg.592	peg	gi|348022777|gb|AGHY01001988.1|_225_338	225	338	+	hypothetical protein				gtggagatccggcgcgacaatctgcagtgccagcgaggcccgatgggcagcgtggcctaccgcgtcgacgacgaaaagaccccgttgctgttcctggtcgcctgcgtgacctga	MEIRRDNLQCQRGPMGSVAYRVDDEKTPLLFLVACVT
gi|348022777|gb|AGHY01001988.1|	fig|487527.6.peg.593	peg	gi|348022777|gb|AGHY01001988.1|_501_986	501	986	+	FIG000233: metal-dependent hydrolase		FIG00000233	ff	atgaccaaaggtcccgtccgcctcgatgtcggcgtcagctacgccctgccccgtgccgggctgccggcggcgacgagtttccgcaaatgggtcgccgcggcgctgaagggccgcatccgcgaggccgacctggcgatccgcctggtcgacgaccgcgaaggccgcgccctgaatctgcactaccgcggcaaggactacgccaccaacgtgctcagcttcccggcggaactgcccgaggggctgccgaaaggcgtcaagctgccgctgctcggcgacttggtgatctgcgcaccggtcgtggcacgcgaagccgccgaacaggacaagccgctcaacgcgcactacgcgcacctgaccgtgcacggcgtgctgcacctgctcggctgggaccacgaggac…	MTKGPVRLDVGVSYALPRAGLPAATSFRKWVAAALKGRIREADLAIRLVDDREGRALNLHYRGKDYATNVLSFPAELPEGLPKGVKLPLLGDLVICAPVVAREAAEQDKPLNAHYAHLTVHGVLHLLGWDHEDDKEAEAMEQLEREILADLGVSDPYAGER
gi|348022779|gb|AGHY01001987.1|	fig|487527.6.peg.594	peg	gi|348022779|gb|AGHY01001987.1|_158_1519	158	1519	+	Exodeoxyribonuclease III (EC 3.1.11.2)		FIG00000065	idu(2);DNA_repair,_bacterial	ttgaagatcgccagctggaacgtcaactcgctcaacgtgcgcctgccgcacctgcaacagtggctggccgcgttcgcgccggacgtggtcgggatccaggagaccaagctggaagaccacaagtttcccgacaccgcgctggccgaggccggctaccgcagcgtgttcgccgggcagaagacctacaacggcgtggcgatcctgtcgcgcctgccgatcggcgacgtgcagatcggcgtgccgggcctggaggacgaacagaagcgcgccatcgccgccaccgtcggcgacctgcgcatcgtcaatctgtacgtggtcaacggccaggacgtgggcagcgacaagtacgcctacaagctgcgctggctggaggcggtgcacgcctggctggccgacgag…	MKIASWNVNSLNVRLPHLQQWLAAFAPDVVGIQETKLEDHKFPDTALAEAGYRSVFAGQKTYNGVAILSRLPIGDVQIGVPGLEDEQKRAIAATVGDLRIVNLYVVNGQDVGSDKYAYKLRWLEAVHAWLADELQRHPRLVVLGDFNIAPGRARRTRSAGVERQPHPHLHCRARRPAQAARPRPARRFPPAPCRWRHLQLVGLSPGRLPPRPGPAHRPDPGVRGAEDAHPRGRHRPRATDLGPPQRPCAGLGRTGAGGMSERHLRRCVDKVGDTAIAPLHRLSCHCGAVQIDLELPHGIVDPRRCNCSLCRRRGAIVASVPLVALHVRQGEQSAAPVPVPYPHRTALLLRYLRHLHASSAPLRSQPVRLQRRLPGRRGPVCAGHRGAGRGRCAAPGRSR…
gi|348022781|gb|AGHY01001986.1|	fig|487527.6.peg.595	peg	gi|348022781|gb|AGHY01001986.1|_29_151	29	151	+	5'-methylthioadenosine phosphorylase (EC 2.4.2.28)		FIG00049258	idu(1);Methionine_Salvage	gtggcgaactgggcggccggctgcggcgacgccgaggagatcaccctggccgaggtgctggccaacgtggaggcggcttcggtcggcctgccggagttggtcggggaactggcgcgcgggtga	MANWAAGCGDAEEITLAEVLANVEAASVGLPELVGELARG
gi|348022781|gb|AGHY01001986.1|	fig|487527.6.peg.596	peg	gi|348022781|gb|AGHY01001986.1|_240_446	240	446	+	Cold shock protein CspD		FIG01304073	isu;Cold_shock,_CspA_family_of_proteins	atgccgaacggtaccgtcaagtggttcaacgacgccaagggatttggttttatttctccggaagacggtagcgccgatgtgttcgcgcacttctccgcgatcaactccaagggcttccgcagcctgcaggaaggacagcgtgtcagctacgacgtgacccagggtccgaagggcgcgcaggcctcgaatatcacgccggtcgagtaa	MPNGTVKWFNDAKGFGFISPEDGSADVFAHFSAINSKGFRSLQEGQRVSYDVTQGPKGAQASNITPVE
gi|348022789|gb|AGHY01001982.1|	fig|487527.6.peg.597	peg	gi|348022789|gb|AGHY01001982.1|_284_1114	284	1114	+	Beta-galactosidase (EC 3.2.1.23)		FIG00001548	icw(1);Galactosylceramide_and_Sulfatide_metabolism icw(1);Lactose_utilization icw(1);Lactose_and_Galactose_Uptake_and_Utilization	gtggggagctgcatccgctgcggatcgcggaaggcggattggctgcatcgcatccgcatgaccaaggcgatggggctgaataccatcgcgctgtacctgatgtggaatgcgctggaaacggcgccggggcagttcgatctggacagcggcgagcgcgatttcgtcgggttcatccggctgtgccagcaggaggggctgtgggtgtatctgcgcccgggtccgtatgtgtgcgcggagtggacgctgggcgggttgccgccgtatctgctgcgcgaagcgaacatccgcctgcgcgaccgccacgacgcacgctacatggcggcggtggaacgctacatcggggcgatcgcgccgcgcatcgcgccgctgatggccagtgccggcgggccagtgctgatg…	MGSCIRCGSRKADWLHRIRMTKAMGLNTIALYLMWNALETAPGQFDLDSGERDFVGFIRLCQQEGLWVYLRPGPYVCAEWTLGGLPPYLLREANIRLRDRHDARYMAAVERYIGAIAPRIAPLMASAGGPVLMLQIENEYSMHGSDVGYLQALAALWRSHGVDGPFSLAEGLKDLRRRQAMLPGAALGLDGPDLHDLQAATGLRRAGAGVGVRGPTRAGSRTGASRSSLAATTRRCCAASPPPAIRSICTWCTAAPTSASAPGPTPRTTARSSSRR
gi|348022789|gb|AGHY01001982.1|	fig|487527.6.peg.598	peg	gi|348022789|gb|AGHY01001982.1|_1655_2032	1655	2032	+	Beta-galactosidase (EC 3.2.1.23)		FIG00001548	icw(1);Galactosylceramide_and_Sulfatide_metabolism icw(1);Lactose_utilization icw(1);Lactose_and_Galactose_Uptake_and_Utilization	gtgcgcgggctggcgctggacgcggaccccacgccgtcgctgcgcccgctgcaggcaccgccgcaacgccccggcctgttcttcgctactgtgttcaccctggaccagcccggcgacctgcacctggacatgcgcgactggcgcaagggctatctgtgggtcaacgggcgcctgctcgggcgctattgggacatcggcccgcagcaatgcctgtattgcccgggcgcctggctgcgcgccggcgccaaccaggtgctgatcctggatctgcatcgcctgcagccgggcctgctgcgctgcgccaacggcctgatacccacacctgcaacgcaggcctcagctccccttccctccccgcaggatcgcgcatgcacatga	MRGLALDADPTPSLRPLQAPPQRPGLFFATVFTLDQPGDLHLDMRDWRKGYLWVNGRLLGRYWDIGPQQCLYCPGAWLRAGANQVLILDLHRLQPGLLRCANGLIPTPATQASAPLPSPQDRACT
gi|348022791|gb|AGHY01001981.1|	fig|487527.6.peg.599	peg	gi|348022791|gb|AGHY01001981.1|_514_344	514	344	-	hypothetical protein				gtggcgcgcacgcacttcttcccccgtcgcggcgacaacgccgaggcgctgtaccaggcgctgcgcgacggcaagctgcagttgctgccgcggcgctggcccgacctgcagctgccgggaacccggcggaccgaggtgtacgccgccgaccccaacgaccagaccgactga	MARTHFFPRRGDNAEALYQALRDGKLQLLPRRWPDLQLPGTRRTEVYAADPNDQTD
gi|348022793|gb|AGHY01001980.1|	fig|487527.6.peg.600	peg	gi|348022793|gb|AGHY01001980.1|_127_1230	127	1230	+	Xanthan biosynthesis exopolysaccharide polymerase GumE			ff	atgcatgctgagcgcgccggccatgccgctgcgcgagcagcgccgcaacctgctgatcgagctggtgctgctgttcgccatcggctacaacttcgtgctggcggtgatcaacgccaaggtgttccgggtcagcccggcgatgacctatgcagtggaactggcggtctacgccgcctgcttcctgctcggcctgcgcgcgctggaccgcaagcgcatggcgatggtgttcaccgggatcgccttgctggcgctgctgatgctggtgcgcctgttcatggcctggtcgctggatccgaagttcttccgcgatgcgctgattccgttcgccttcctgctgctcggcgcagcctacccggctcgttgccgcgcatgttcgtgcgcatggcgctgctggtgtcg…	MHAERAGHAAARAAPQPADRAGAAVRHRLQLRAGGDQRQGVPGQPGDDLCSGTGGLRRLLPARPARAGPQAHGDGVHRDRLAGAADAGAPVHGLVAGSEVLPRCADSVRLPAARRSLPGSLPRMFVRMALLVSLVAVFELALPKVYGDVVNPKSYFVNARGASASSFWNQDSNLFVSATRPGARNFLPSSNLPRASSVFIEPVTMGNFIIFFTAILLTFWRWMRPWAVVASVAMIGFLIVASDGRLAAGTCVMMALLSPLLLRMDQRLGFLIFFAVMGGAWLLVWASGIQSYEDTTLGRVFFTVDSIRRMSADAWLGLDMAQPYRYFDSGIAYFISSQSVLLVLAFLLAYSFAMLMRTIEGQLFKTC
gi|348022797|gb|AGHY01001978.1|	fig|487527.6.peg.601	peg	gi|348022797|gb|AGHY01001978.1|_193_309	193	309	+	hypothetical protein				gtgcgcaaccgcgcgatcttcgccgccaagtgggccgaggtggttgccgcggcacctggcgccgggcacggtgccgacgccaagcgcggctgcaccgccagcagcgccaggtgctga	MRNRAIFAAKWAEVVAAAPGAGHGADAKRGCTASSARC
gi|348022799|gb|AGHY01001977.1|	fig|487527.6.peg.602	peg	gi|348022799|gb|AGHY01001977.1|_1499_27	1499	27	-	Carboxypeptidase C (cathepsin A)		FIG01213272	ff	gtgctgctggccgcgacgccgatgaccggcggcgctggccgccgatgccgatgcggcgaatgccgacaagcccgacaaaggccgccgccgaaccggcgccgctgccggccgatgcgcagaccagccagtccatccagctcgacggtcgcacgctgcgcctacacggtcaaggtcggcacgctgccggtgaaggacaagcagggcaaggtcgtcgccgacgtggtctataccgcctacaccatggacggcaaggaccgcccggtgaccttcgcgctcaacggcggccccggcgcggcctcgggggtatctcaacctgggcgcgatcgggccgaaggtggtggcgttcggcagcgagggcgacagcgcctcggcgccggcgcacctgcgcgacaaccccgg…	MLLAATPMTGGAGRRCRCGECRQARQRPPPNRRRCRPMRRPASPSSSTVARCAYTVKVGTLPVKDKQGKVVADVVYTAYTMDGKDRPVTFALNGGPGAASGVSQPGRDRAEGGGVRQRGRQRLGAGAPARQPRHLAGLHRPGVHRPGRYRLQPLAGPDEQAKKQFYNPQADVEYLSRTIYDWLLKNQRLQSRKYLVGESYGGFRGPRITHYLQTKLGVAMNGVVLVSPYLNPTLDDNGDVSPLPWMLTLPSIAAAHLEREGKLTPEAMRQVIDYTRGDYVTALLRGRSDPAGTTRMIQQVTAMTGLDPAFVRRAGGRLETQAYLREVFRDKGELGSRYDSNVTAFDPFPNAPEQRANDPLLDSIIAPTTTAMVDFVTRVVGWKIDARYEALNYDVNRLW…
gi|348022803|gb|AGHY01001975.1|	fig|487527.6.peg.603	peg	gi|348022803|gb|AGHY01001975.1|_337_206	337	206	-	hypothetical protein				gtgccccgacgctacgacgatcacgacaccgacgatcaggacgacgccctggacagccccgccgcggtatggccgccggcgcctgctcacctggggcctggcggccggccgcactcggcctgggcttcctga	MPRRYDDHDTDDQDDALDSPAAVWPPAPAHLGPGGRPHSAWAS
gi|348022809|gb|AGHY01001972.1|	fig|487527.6.peg.604	peg	gi|348022809|gb|AGHY01001972.1|_630_76	630	76	-	ATP-dependent DNA ligase (EC 6.5.1.1)		FIG00052980	idu(1);DNA_Repair_Base_Excision	ttgcacctggacgggatcgacatcgctgccgccccgctgtccgagcgcaaggcattgctgcagcggctgctgcagggcgccgatgcgcacctggccttcagctcgcacatcgacggcgatggcgacgcggcgttccagctcgccggcgcgcagcacttcgaaggcatcgtctccaagcgcgccgaccgcggctaccacggcggccgcagcgacgactggcgcaagaccaagcagttgcgctcggaggaattcgcggtggtgggctacaccgcgcccaagggcagccgcagcggcttcggctcgctgctgctggcgcggccggatgccgagcacggctggctgtacgtcgggcgcgtgggctccggcttctccgacgccttgctgcgcgaggtgaccgca…	MHLDGIDIAAAPLSERKALLQRLLQGADAHLAFSSHIDGDGDAAFQLAGAQHFEGIVSKRADRGYHGGRSDDWRKTKQLRSEEFAVVGYTAPKGSRSGFGSLLLARPDAEHGWLYVGRVGSGFSDALLREVTALIGKAAQRHAQRARADHRDRPAQRALVRAGASWWKCSTAASAGNSCCARPR
gi|348022811|gb|AGHY01001971.1|	fig|487527.6.peg.605	peg	gi|348022811|gb|AGHY01001971.1|_309_34	309	34	-	FIG01210275: hypothetical protein		FIG01210273	ff	atgtccagcatcgacatccgccacgaccacaccaagacccccgcgcaggcccgcaaggccatcgaaaccgccgccaagaaactggccgagcgtttcgatctggaatcgcattgggatggcgattccttgctgttctcgcgctcgggcgtggacggacgcatcgaactgctgcccaagcaggtgcatgtcaccgccgaactgggttttctgctgtcggcgatgaagggcacggtggagagcgagattcgccgggtgctgtcggaaaagctggcctga	MSSIDIRHDHTKTPAQARKAIETAAKKLAERFDLESHWDGDSLLFSRSGVDGRIELLPKQVHVTAELGFLLSAMKGTVESEIRRVLSEKLA
gi|348022817|gb|AGHY01001968.1|	fig|487527.6.peg.606	peg	gi|348022817|gb|AGHY01001968.1|_578_30	578	30	-	cardiolipin synthase		FIG01210368	ff	gtgctgcgcaccgagacccgcccgtcctacctgagccggcgcatcgccaaccggccgttgccggtgacccgcgagggcgcgcgtatgggcctgcacgccaagtcgctggtggtggaccgccgtgtcggcgtgatcggcacccacaacttcgacccgcgcagcgagacctacaacaccgaaggcgcggtgatcgtcgacgatccggcgttcgcgcaggcactggcggccagcatcggccgcgacatcgagccggagaattcctgggtggtggcaccgcgggtcaagccgccggtgctgtcgggcctgaactacagcatgggcaaggtctccgaggcgctgccggtgctggacttctggccatggcgctacgccaccgactacgatttccagcccagcccc…	MLRTETRPSYLSRRIANRPLPVTREGARMGLHAKSLVVDRRVGVIGTHNFDPRSETYNTEGAVIVDDPAFAQALAASIGRDIEPENSWVVAPRVKPPVLSGLNYSMGKVSEALPVLDFWPWRYATDYDFQPSPDCPAPLTRRDPGFHRCYKAVGDFPEVNVGPKWLLVRMLTAFGSGLVPIL
gi|348022821|gb|AGHY01001966.1|	fig|487527.6.peg.607	peg	gi|348022821|gb|AGHY01001966.1|_402_49	402	49	-	Transcriptional regulator, AsnC family		FIG01210237	ff	gtgtacagcggctggaggcccgagggcgtggtggccggctacgccgcgcggctggtgccggcggcgatcggcctgggcctgcaggccttcgtccgcgtgcagctggagaagcacggccagagcggcatcgcccatttcgccgacagcgtgcagggctgggacgaagtggtcgcgtgccatgcgctgaccggcgacatggactacctgctgcacgtctacgtccgcgatctggcgcacttctccgcgtttctgctggacaagttgctcaacgccgccggcgtcgccgacgtcaattccagcttcgtgctgcgcacggtcaaggacttcgccggcctgccgctgccgcgcggctag	MYSGWRPEGVVAGYAARLVPAAIGLGLQAFVRVQLEKHGQSGIAHFADSVQGWDEVVACHALTGDMDYLLHVYVRDLAHFSAFLLDKLLNAAGVADVNSSFVLRTVKDFAGLPLPRG
gi|348022823|gb|AGHY01001965.1|	fig|487527.6.peg.608	peg	gi|348022823|gb|AGHY01001965.1|_120_926	120	926	+	hypothetical protein				atgaggtggtgcacgccgggccgtgggctgggcggccagatcgcgatcggactcgccaacgtggccaatgtcgatgcgcgcgcactggacatccaggatgcggtgctggtcgacgaactggtcgacgccggccacgtgcagggcgcggcgatcgacctgcgcctgaccgataccggcaacgccagcatcgagggcgcgctgcgcatcggcgatggcgggctgatcgacgagccgttggacgctgccgacctgctcgcgtccgatgtcgcggtcacgctgctgcgcagcggcaatgcggtcgctgccgaagcgcggatcgtggacggcgaactgatcgacgaagcgatcgatgtgggggcgatacaggatgcggtgttggcggttcgcttcgaggatgcc…	MRWCTPGRGLGGQIAIGLANVANVDARALDIQDAVLVDELVDAGHVQGAAIDLRLTDTGNASIEGALRIGDGGLIDEPLDAADLLASDVAVTLLRSGNAVAAEARIVDGELIDEAIDVGAIQDAVLAVRFEDAGNPACRGRADRGGRTDRRGDRCRVHRRRHARRRVRGQRQRHRRRPGHRPWRTDRRGGRPAGPARPRAAAPGHGRCRQRPGPGAGHRRGRTGRRSAGPDRCARCQRGTARAAQRQCRRRAIGVGPARVDRGWRVDG
gi|348022823|gb|AGHY01001965.1|	fig|487527.6.peg.609	peg	gi|348022823|gb|AGHY01001965.1|_916_1242	916	1242	+	hypothetical protein				ttgatggatgaggtgatcggcgcggcaggcacgctggacggattcgccggcatcgtcgatctcggcgatgtcgccaacgcgcgcgccgcacgcatcgcgctgcagggcgcgcagctgctcgacggcgtggtggacgccgcgtcgctgcgcgtcagcgaactcggcctgcaactgaccgatgtggccaacgcgcgctatcgggacgccttggacatgcaggacaacagcacgctgttgggggcgatcgccgacgtggacagccgcgatgccgcatcgcagatcgccacggtggtcgtggccagcggggaggcgatccaggtgccctag	MMDEVIGAAGTLDGFAGIVDLGDVANARAARIALQGAQLLDGVVDAASLRVSELGLQLTDVANARYRDALDMQDNSTLLGAIADVDSRDAASQIATVVVASGEAIQVP
gi|348022823|gb|AGHY01001965.1|	fig|487527.6.peg.610	peg	gi|348022823|gb|AGHY01001965.1|_1364_1239	1364	1239	-	hypothetical protein				atgcgtggcaagcatgccgccgcacctgacaccgcgcctgcagacaacggcaagctgcccgaattgcgtggcggcgattgcagcgctgccaccacccgccgcagtgctcgccggaacacccgctag	MRGKHAAAPDTAPADNGKLPELRGGDCSAATTRRSARRNTR
gi|348022825|gb|AGHY01001964.1|	fig|487527.6.peg.611	peg	gi|348022825|gb|AGHY01001964.1|_31_243	31	243	+	hypothetical protein				gtgcgcttcccgccgcacgcggtgccggaacaggcgcattggttggccgccggcaagccgctggcgggcgcagggcgagcggctggagtccgcgcatggccaggtgctgcatgcgcaggcgctgggtgcgagcgacgcgacgctgcagccgttggcagcgaaaccgaagccgcccaagcctcatcacaagccgttgcacgggcatgcggatga	MRFPPHAVPEQAHWLAAGKPLAGAGRAAGVRAWPGAACAGAGCERRDAAAVGSETEAAQASSQAVARACG
gi|348022825|gb|AGHY01001964.1|	fig|487527.6.peg.612	peg	gi|348022825|gb|AGHY01001964.1|_454_1362	454	1362	+	MFS transporter				atgagcggcgccggtccgcgccagcgcccgcgtggcacgcgcgcactggaggcgctcaacttcaccatggccgacgtgcaggacgggctcggcccgttcctgagcgtgttcctgcaatccaagggctggtcgctgggcgcgatcggctcggtgatgactgccggcggcatcgtgggcatgctcgccaccaccccaggcggtgcgctggtcgatgcgaccaagcgcaagcgcagcatcgtggtggtcggctgcagcatgatcctgctggcctcggcgctgctgtggtggtcgccgacgttgccgggcgtcatcgccgcgcaggtgatgaccgcgcttgccgccgccgcactggggccggcgttgtccggcatcaccctgggcctggtgcggcaggccggc…	MSGAGPRQRPRGTRALEALNFTMADVQDGLGPFLSVFLQSKGWSLGAIGSVMTAGGIVGMLATTPGGALVDATKRKRSIVVVGCSMILLASALLWWSPTLPGVIAAQVMTALAAAALGPALSGITLGLVRQAGFDHQIARNQVGSHAGNVVAAALAGVLGWKFGFGAVFVLTGCFGVLAIVSVLLIPRDAIDHRAARGMAEKEDADGAHVSGWSVLADLQTLAGAGRGAGAVSSRQCGDAAAVRHGGGGRAPGRSERADRHYHHRRPGHHGAGLAAGDAPDPRARALVGPAADLPGAAAARG
gi|348022829|gb|AGHY01001962.1|	fig|487527.6.peg.613	peg	gi|348022829|gb|AGHY01001962.1|_194_721	194	721	+	5,10-methylenetetrahydrofolate reductase (EC 1.5.1.20)		FIG00000453	isu;One-carbon_metabolism_by_tetrahydropterines isu;Methionine_Biosynthesis	atgggccaccccggcgacctgcgctatgccgccgacctgatcgccttcatccgcgccgagcacggcgacgccttccatctggaagtgggcgcgtatccggaaacgcatccgcaggccaacgacgcgctcagcgacctgcgccacttcaaggccaaggtcgacgccggcgccgatgccgccatcacccagtatttctacaacgccgacgcctacttccacttcgtcgacgcggtgcgcaagctcggcgtgcagatcccgatcgtgcccggcatcatgccgatctccaacttcagccagctgcggcgcttctccgaacagtgcggcgcggaaatcccgcgctggatcggcaagcgcatgcaggcctacggcgacgatgccgaggccatccgcgagttcggc…	MGHPGDLRYAADLIAFIRAEHGDAFHLEVGAYPETHPQANDALSDLRHFKAKVDAGADAAITQYFYNADAYFHFVDAVRKLGVQIPIVPGIMPISNFSQLRRFSEQCGAEIPRWIGKRMQAYGDDAEAIREFGADVVATLCQRLIDGGAPGLHFYTLNLAKPTTSVLARLPLAVG
gi|348022831|gb|AGHY01001961.1|	fig|487527.6.peg.614	peg	gi|348022831|gb|AGHY01001961.1|_1058_1177	1058	1177	+	hypothetical protein				gtgcggcggccgcagccgcggcggcaaaggccgcgcaaccggcgccgccgccgtgcgaaccgccgtcgcgggctcggccgcctgctgcgccgcgacgatccctgcaagccgaaggactga	MRRPQPRRQRPRNRRRRRANRRRGLGRLLRRDDPCKPKD
gi|348022833|gb|AGHY01001960.1|	fig|487527.6.peg.615	peg	gi|348022833|gb|AGHY01001960.1|_11_547	11	547	+	methyl-accepting chemotaxis sensory transducer				gtggccgacgaggtgcgcaacctctccgagcgctcgaccaccttcaacgagcagatccgcaagctggcgcacagctccaaggacgccatcgccaaggtccgcgagacggtctcgaacatggcctcgcgcgacatggaccgctcccgcgaggcgcgggccgaagccgcggcgatgctggacaacgtggccgcgatcaaccactcgctgggcgacggcatgcgcgagatctccgagtgcggccgcgccatcgacagcagcgtcgccgaagcggtgcgcgccctgcagttcgaggacatcgcgacccaggccctgggcggcgtgcacacccacctggaccgcctgaccgcgatcaaccgcgaggccgtggcgctgcaggaactgctgcaccgcaatggcggc…	MADEVRNLSERSTTFNEQIRKLAHSSKDAIAKVRETVSNMASRDMDRSREARAEAAAMLDNVAAINHSLGDGMREISECGRAIDSSVAEAVRALQFEDIATQALGGVHTHLDRLTAINREAVALQELLHRNGGVFDHELIDALQRVGNRLRDMRTEWERPPHKPVAQQSMGAGTVELF
gi|348022839|gb|AGHY01001957.1|	fig|487527.6.rna.5	rna	gi|348022839|gb|AGHY01001957.1|_270_199	270	199	-	tRNA-Glu-CTC				gctcccttcgtctagtggttaggacgtggccctctcaaggctaaaacaggggttcgagtcccctagggagcg
gi|348022841|gb|AGHY01001956.1|	fig|487527.6.peg.616	peg	gi|348022841|gb|AGHY01001956.1|_33_254	33	254	+	hypothetical protein				gtggaactgctggccccgcgccagcgcgaggaagaactgggcgcggatgctgggcggcgtcgaggtcagcaaggaagcccgcgccgcggccaagcggctgctgctcagcgccggctgagcggcggccatcgcacgcggctgcaccgctgggccaaactgccccacatgggcgatctggatcggatcacaaagcggcacagccccagccgccaatgcagctaa	MELLAPRQREEELGADAGRRRGQQGSPRRGQAAAAQRRLSGGHRTRLHRWAKLPHMGDLDRITKRHSPSRQCS
gi|348022843|gb|AGHY01001955.1|	fig|487527.6.peg.617	peg	gi|348022843|gb|AGHY01001955.1|_539_81	539	81	-	Aldehyde dehydrogenase (EC 1.2.1.3); Probable coniferyl aldehyde dehydrogenase (EC 1.2.1.68)			idu(1);Pyruvate_metabolism_II:_acetyl-CoA,_acetogenesis_from_pyruvate idu(1);Glycerolipid_and_Glycerophospholipid_Metabolism_in_Bacteria idu(1);Methylglyoxal_Metabolism	gtggagcgcgaacgcgccgagcgcgagcggctgatcgtgccgaccgtggtgttgcagccgggcgacgacgcagtgctgatgcaggaggagatcttcggcccgatcctgccggtgcgcagctaccgctcgctggatgcggccatcgccgagatcaacagccgcgaccggccgctggcgctgtatcccttcagccacgaccgcgcgcgcatcgagagcatcctgcatgccaccgtcgccggcggcgtcaccgtcaacgacagcctgctgcacttcgccgccaacgcgctgccgttcggcggcatcggccccagcggcatgggtgcctaccacggccgcgccggcttcgacgccttcagcaaggccctgccgatcctgtggcaggcacgccgcgccggcagc…	MERERAERERLIVPTVVLQPGDDAVLMQEEIFGPILPVRSYRSLDAAIAEINSRDRPLALYPFSHDRARIESILHATVAGGVTVNDSLLHFAANALPFGGIGPSGMGAYHGRAGFDAFSKALPILWQARRAGSDLLKPPYARIARMLSFLVR
gi|348022845|gb|AGHY01001954.1|	fig|487527.6.peg.618	peg	gi|348022845|gb|AGHY01001954.1|_382_987	382	987	+	L-serine dehydratase (EC 4.3.1.17)		FIG00000551	isu;Glycine_and_Serine_Utilization isu;Pyruvate_Alanine_Serine_Interconversions	atgcgcgatccgctgaccacgctggactgggtcaacctgtacgcgctggcggtcaacgaagagaacgccgccggcggccgcgtggtcaccgcgcccaccaatggcgcggcgggcatcattccggcggtgctgcactacttcgaccgcttctgccccggcgccgacgaacagcgcgtgttcgacttcctgctcaccgccgcggcgatcggcatcctgtacaaggaaaacgcctccatctccggcgccgaggtcggctgccagggcgaggtcggcgtggcctgctcgatggcggccggcggcctggtcgccgcgctcggcggcaagccggggcagatcgagaacgcggccgagatcggcatggagcacaacctcggcctgacctgcgacccgatcggcggc…	MRDPLTTLDWVNLYALAVNEENAAGGRVVTAPTNGAAGIIPAVLHYFDRFCPGADEQRVFDFLLTAAAIGILYKENASISGAEVGCQGEVGVACSMAAGGLVAALGGKPGQIENAAEIGMEHNLGLTCDPIGGLVQIPCIERNAMGAVKAINASRMAMRGDGKHKVSLDKVIRTMRDTGRDMQDKYKETSRGGLAVNVIEC
gi|348022853|gb|AGHY01001950.1|	fig|487527.6.peg.619	peg	gi|348022853|gb|AGHY01001950.1|_68_1075	68	1075	+	Radical SAM domain protein				atggcaccgtggtgcacaaccgcaaccgcgccttccagcgcggcgacgcgctgccgtcgctgccgtacgagaagctcggcgaagccgcgccgctatctcggccgcaccttcctcggccgccgcaccgcctcgcaccaggccgcgctgggctgccgcttccgctgcaccttctgcggggtggcggcgatgttcggcggcgccaccgccttgccgaccgcggcacgcctggaacgcgagcttgggtatctgaagtacggcctgggcgccgattcgatccagttcttcgaccacaacttcttcgaaccgcgaagccgacatgattccgctgctggaggtgatggcgaagctggaactgccgtggtggtgctatgcccgcgcggacgcgctgctcaacctgtc…	MAPWCTTATAPSSAATRCRRCRTRSSAKPRRYLGRTFLGRRTASHQAALGCRFRCTFCGVAAMFGGATALPTAARLERELGYLKYGLGADSIQFFDHNFFEPRSRHDSAAGGDGEAGTAVVVLCPRGRAAQPVREHLEAGAQEPPAHGLHRRRVAERGDAQGDPQGHAAGPDPGSGRAVPAQRGDPRTVVHGRATAGQRARDRTDLRVHPRAEADQPAVGNHRLRVHPAAREQPPREGPRPPRGHALARSRRRAGAVPAYAGGMGAAAVGGLRLPRRCALAHRCAAPAHPRFRHRARLPLSHCAGPALAGLGQARAQRAGRLALPLPALPTGRGS
gi|348022859|gb|AGHY01001947.1|	fig|487527.6.peg.620	peg	gi|348022859|gb|AGHY01001947.1|_754_632	754	632	-	hypothetical protein				gtggcgatgcatgccgccagatcgacgcagcgccgccagcgtggcgtctgccgcttcaccaccatcgagatcccatgcccgccgacacgccgcgttcccccgcaccgcaccgcccgcgcctga	MAMHAARSTQRRQRGVCRFTTIEIPCPPTRRVPPHRTARA
gi|348022859|gb|AGHY01001947.1|	fig|487527.6.peg.621	peg	gi|348022859|gb|AGHY01001947.1|_759_908	759	908	+	hypothetical protein				atgcatacgcggacggcgccgcagcgtcgctgcacggcgccggcatcgcatcttaccgcgcccgcccctggcacaccggctgcgctgctcagcgccgcggccagccaagcgctgaggccggccgccaagcgctgctgcaaggacgtatag	MHTRTAPQRRCTAPASHLTAPAPGTPAALLSAAASQALRPAAKRCCKDV
gi|348022865|gb|AGHY01001944.1|	fig|487527.6.peg.622	peg	gi|348022865|gb|AGHY01001944.1|_28_483	28	483	+	hypothetical protein				atgggtgatgcggaaggcgtactgctggctgtcctcggcctgcagcagcacctcggcctcgccttcgatcggcccggccaggtcctgcagttcgctgacgtgcaactgcaccccgcgcagcgccaccagcatgcccggacgcaccggggtgtcgctggcgcggccgagcaggccgccgtgcaccgccatcgcctgcgcgccgtactcgcacaggtgcagcgcgcgcagtcggccaccgctgcgcagcggatgctcggcctggcgatgcgccaggctgcgcaccaccacgcgctgcgcgtcccaggccaccacctcctcccacaggcacatcaggccctggtgcggcaccagcgcggcgatggcctcgcgtccgtgcaagcgttcagtgtgcatggcggc…	MGDAEGVLLAVLGLQQHLGLAFDRPGQVLQFADVQLHPAQRHQHARTHRGVAGAAEQAAVHRHRLRAVLAQVQRAQSATAAQRMLGLAMRQAAHHHALRVPGHHLLPQAHQALVRHQRGDGLASVQAFSVHGGSPGHRWRSRAKSAAPARN
gi|348022869|gb|AGHY01001942.1|	fig|487527.6.peg.623	peg	gi|348022869|gb|AGHY01001942.1|_37_249	37	249	+	hypothetical protein				gtgcgcggcgaggactatccgttggtccagcgctacagcctgtacggcgggcagatgatgtcggcgctcggccgcagcctggccctgtatgcgatcggcccgcaggcgcagcaactggtgcgccggctccgtccgatcgccatgacgatcgacggtcgaccccaccacaccggcaagcgggagcaccgctgtccgcaccgacgcggcctatga	MRGEDYPLVQRYSLYGGQMMSALGRSLALYAIGPQAQQLVRRLRPIAMTIDGRPHHTGKREHRCPHRRGL
gi|348022871|gb|AGHY01001941.1|	fig|487527.6.peg.624	peg	gi|348022871|gb|AGHY01001941.1|_476_300	476	300	-	transcriptional regulator		FIG01210230	ff	atgctgcacaacctggacaatgcgctgaagctggccaagcaccgcgtgtcgatcctgctgtgcggcgccaccggcaccggcaaggaggaattcgccaaggcggtgcaccgcggctcgccctgggccgaccggcccgttcgtggcggtgaactgcgcggcgattcccgaaggcgctga	MLHNLDNALKLAKHRVSILLCGATGTGKEEFAKAVHRGSPWADRPVRGGELRGDSRRR
gi|348022873|gb|AGHY01001940.1|	fig|487527.6.peg.625	peg	gi|348022873|gb|AGHY01001940.1|_514_11	514	11	-	FIG01209941: hypothetical protein		FIG01209939	ff	atggaaaaactgttccgcggcgggcatttcctcatcatcctgctgttcctgctgtgcgcggccgggctgatctgcatggccgtgctcgagctctggtacggcctgacgccgggcggcgaactggtggtgcgcgaccgcttcaacgtggtgctggaagcgatcgggttgctcaccgtggcgctggtgaccctggagctgggccagaccatctacgaggaagaggtgcagcgcgacgtcaaggtcagcggaccgacccgggtgcgccgctacctgtcgcggttcttcgtggtcatcgtcatcgccctggcgatcgagaccctggtgtcgatcttcgaactgatgcacgacgacccggccaagctgccctacgccgccgcggtcggcctgtgcgcggcgctg…	MEKLFRGGHFLIILLFLLCAAGLICMAVLELWYGLTPGGELVVRDRFNVVLEAIGLLTVALVTLELGQTIYEEEVQRDVKVSGPTRVRRYLSRFFVVIVIALAIETLVSIFELMHDDPAKLPYAAAVGLCAALLLVAWGVFVKLNRSAEELEPEAMAEAKREDAQVE
gi|348022877|gb|AGHY01001938.1|	fig|487527.6.peg.626	peg	gi|348022877|gb|AGHY01001938.1|_249_995	249	995	+	Transcriptional regulator, AraC family		FIG01112948	ff	atgactgctgccgccagttccgtggacttgctgcgtgccctggcaccgcaggagggctacaccttgaccgcgttgccggatgtgcgcgtgctgcgctcggaccggccgttgaccgacacgccggtgctgtacgacccgggcatcgtcatcgtctgccagggcgccaagcgcgggcatttcggcgatgcggtgtatgtctacgacgagcagcactatctgtccgtcgccgtcccggtgcccttcaccatgcagtccgatggcagcccggagcggccgctgctggcgctgtacctgcatctggatttccagcttgcggcgggactgctggtcgagctggaccaggccggtccggtccagctcgcgcaggcgccggcgagcatggtgtccagtccgatggac…	MTAAASSVDLLRALAPQEGYTLTALPDVRVLRSDRPLTDTPVLYDPGIVIVCQGAKRGHFGDAVYVYDEQHYLSVAVPVPFTMQSDGSPERPLLALYLHLDFQLAAGLLVELDQAGPVQLAQAPASMVSSPMDEALRQTVQRLLQALSHPLDAAILGRALVREVYFRVLTGPQGHGLRAALAQQGHFGRIGRALQRIHRDHARRLDVAELAREARDEHAVVPCAFQGGDPGRADAVPEVDPPAPRRAC
gi|348022877|gb|AGHY01001938.1|	fig|487527.6.peg.627	peg	gi|348022877|gb|AGHY01001938.1|_949_1182	949	1182	+	Transcriptional regulator, AraC family				atgcagtacctgaagtcgatccgcctgcaccaaggcgcgcctgctgatggcgcgcgagggcatgacccgcagcgggcgcctgccacgcggtcggctacgagagccgcctcgcagttcacccgcgagttcaaacgtctgttcggccggccgccgatggccgaggcgcggcgcatgcgcgccgagttcgccgtgcctccggtcgcaccaggggccggattcgtggcctcgcattga	MQYLKSIRLHQGAPADGARGHDPQRAPATRSATRAASQFTREFKRLFGRPPMAEARRMRAEFAVPPVAPGAGFVASH
gi|348022883|gb|AGHY01001935.1|	fig|487527.6.peg.628	peg	gi|348022883|gb|AGHY01001935.1|_22_318	22	318	+	2-octaprenyl-3-methyl-6-methoxy-1,4-benzoquinol hydroxylase (EC 1.14.13.-)		FIG00000684	idu(1);Ubiquinone_Biosynthesis idu(1);CBSS-87626.3.peg.3639	gtggtacgccggcagctaccgcgatcggcaccctggccgggctgcgcggcgatggctggaacctgggcttcgtggtcgagaccgagcgccaggtcgaggcgcacctggacgaacatctgcagaccctgccgccggccggacctgcgcagccgcgacatactgaacgtgatgaaggccgacgaggcccgccacgccgagcacgccgaacaggccggcgcacggcgcctgccgccgccgatccccacggtcatggccgccgcctcgcggctgatgaaggccgtcgcctatcggctgtag	MVRRQLPRSAPWPGCAAMAGTWASWSRPSARSRRTWTNICRPCRRPDLRSRDILNVMKADEARHAEHAEQAGARRLPPPIPTVMAAASRLMKAVAYRL
gi|348022885|gb|AGHY01001934.1|	fig|487527.6.peg.629	peg	gi|348022885|gb|AGHY01001934.1|_40_1008	40	1008	+	Putative sulfite oxidase subunit YedY		FIG00637910	ff	atgtcgttgcgcgatgccctctccgtccccagccgcgagatcaccgacgagacggtctaccgcgaccggcggcgcctgctgcaggtcctggcgctgaccccggtggccggcctggtcggctgcgccgatgccgagccgccggccccgcccaagaccgtggtgaccccggagcaggcgcgcagcgggtttcgcaccaacgaggagctgacccgctacgaggacgtgaccagctacaacaacttctacgagttcggcaccgacaagaccgatccgtccaaggcggccaagaccctgcgcacctcgccgtggtcggtgaaggtgtccggcgagtgcgagaagcccggcacgctgagcctggacgacctgctcaagggccacacgcccgaggagcggatctac…	MSLRDALSVPSREITDETVYRDRRRLLQVLALTPVAGLVGCADAEPPAPPKTVVTPEQARSGFRTNEELTRYEDVTSYNNFYEFGTDKTDPSKAAKTLRTSPWSVKVSGECEKPGTLSLDDLLKGHTPEERIYRLRCVEGWSMVIPWLGVPLGDVLKRFAPTSKAKYVAFTTLADPQQMPGIRYSSIDWPYKEGLRIDEAMHPLTLLATGLYGKPLPQQNGAPLRLVVPWKYGFKSIKSIVEIRFVERMPETAWHELQPSEYGFFSNVNPAVDHPRWSQKTERRIAGKASKLFAERIPTRPFNGYADQVASLYAGMDLKKWY
gi|348022887|gb|AGHY01001933.1|	fig|487527.6.peg.630	peg	gi|348022887|gb|AGHY01001933.1|_113_667	113	667	+	Periplasmic thiol:disulfide interchange protein DsbA		FIG00013811	idu(1);Biogenesis_of_c-type_cytochromes idu(1);Periplasmic_disulfide_interchange	atgtcgacatcgcgggcggccagccgttccagccgaccaacggcaagatcgaggtggccgagatcttcggctacgtctgcccggcctgcgcgcgcttcccagcccctgatcggcccgtggaaggccggcctgccctccgacgtgcgcttcgtctatgtgccggcgatgttcggcggcacctgggacgactacgcccgcgcgttctacgccgccgaggcactgggcgtgcaggagaagacccacgatgcgttgtacaaggccatccacgtcgaccagaccctgaagggcgagcgcggccgcgactcggtgcaggacatcgccaacttctatgccaagtacggcgtggacccgaagcagttcgccgacaccatgggcagcttcgcggtggccaccaagacc…	MSTSRAASRSSRPTARSRWPRSSATSARPARASQPLIGPWKAGLPSDVRFVYVPAMFGGTWDDYARAFYAAEALGVQEKTHDALYKAIHVDQTLKGERGRDSVQDIANFYAKYGVDPKQFADTMGSFAVATKTNRAKQFATRSGISGTPSLIINGKYLVKGKSYDDMLRIADHLIARERTAMAK
gi|348022899|gb|AGHY01001927.1|	fig|487527.6.peg.631	peg	gi|348022899|gb|AGHY01001927.1|_1381_461	1381	461	-	Beta-lactamase (EC 3.5.2.6)		FIG00000747	idu(2);Beta-lactamase idu(2);Tn552	ttgccgccggggctgcaggacctggatgcgcaggtggagcgcgtgcgcaagcagttcgacgtgccgggcatcgccatcgccatcgtcaaggacgggaaggtggtgctggagcgcggctacggcgtgcgcgaactcggcaagccggaaccggtggacgcgcagaccctgttcgccatcgcctccaataccaaggccttcacctccgcggcgctgtcgatcctggcagacgaaggcaagctcaagctcgaggaccgggtggtggaccacctgccgtggttccagatgtccgatgcctacgtcacccgcgagatgcgcgtgcgcgacctgctcagccaccgcagcggcctgagcctgggggcgggcgacctgctgttctggccggccaccagctacagcaac…	MPPGLQDLDAQVERVRKQFDVPGIAIAIVKDGKVVLERGYGVRELGKPEPVDAQTLFAIASNTKAFTSAALSILADEGKLKLEDRVVDHLPWFQMSDAYVTREMRVRDLLSHRSGLSLGAGDLLFWPATSYSNEEVVRRLAHVPLKGGFRDRYAYDNILYAVAQKLIEQVSGQSYADFVRQRIFVPVGMTGARINSDHLQPGDAAAVGHAKFDFRELRTVAPLTWSNNSGAGGIYANVHDMAKWMQVQLGRRPPAGGRWPGAAVVQCAAPAGDVADDHADRDLRAERAGTAAGQARTSPATARAGA
gi|348022901|gb|AGHY01001926.1|	fig|487527.6.peg.632	peg	gi|348022901|gb|AGHY01001926.1|_1371_562	1371	562	-	Cytochrome d ubiquinol oxidase subunit I (EC 1.10.3.-)		FIG00096593	isu;Terminal_cytochrome_d_ubiquinol_oxidases isu;Cytochrome_c_oxidases_d@O_copy isu;Terminal_cytochrome_oxidases	atgtgggaaaccgagcaggcgccggccgacttcaccgccttcggcatccccaaccaggccaccggcaagaacgactacgcaatcaaggtgccgtacctgatgggcctgatcgccacgcgctcgttgaacacgccggtgccgggcatcctggagctggtcaagcgcgccgagcaccgcgtgcgcggcgggcagatcgcctacggcgcgctgcagcggctcaaggccaaccgcaacgatgccgaggcgcgggcggtgttcgatcgccactggcaggacctggggcacggcctgctgctcaagcgctaccgcgaggacatcctcaacgccaccccggaggagatcgccaaggccgcgctggacacggtgccgcgcgtgctgccgctgttctggacgttccgg…	MWETEQAPADFTAFGIPNQATGKNDYAIKVPYLMGLIATRSLNTPVPGILELVKRAEHRVRGGQIAYGALQRLKANRNDAEARAVFDRHWQDLGHGLLLKRYREDILNATPEEIAKAALDTVPRVLPLFWTFRVMAGLGFYLIAFFAAALWFSCKHNFEDKRWFLKLALWTLPAPWIAIECGWFVAEYGRQPWAVEGVLPTFYAASGLALHDILITLAGFVAIYTTLLIIEIKLMLKAIRKGPDALPALLQPAPRPVPPIAAPAAAGHL
gi|348022903|gb|AGHY01001925.1|	fig|487527.6.peg.633	peg	gi|348022903|gb|AGHY01001925.1|_1363_2	1363	2	-	hypothetical protein				atggccaaggccttcgtgaagtactgggacgccaaatacgaccacatcgcgatcccggaaaagggcatcaagccgctcgccgagggccagggcgcgccggcgcgcacgccgacccacgcaggcggcaggcagggcggccacgacggcatcgcgctgaccgccgcctacgacctgggcgtcaagcacgacgacgtgaagtacgcgatcaacgtcaagagcagcaagtactaccaccccggcgtggacggcaagcatctgtcgcagggctacatcgactgctccggctgggtgaccgagctgcagaacgcgacgatgaacgagatcaaccgcaaggccgggcgcgacgtgttcacccagaaggacatgttggcgcagggcatggtcggctccggcgagatc…	MAKAFVKYWDAKYDHIAIPEKGIKPLAEGQGAPARTPTHAGGRQGGHDGIALTAAYDLGVKHDDVKYAINVKSSKYYHPGVDGKHLSQGYIDCSGWVTELQNATMNEINRKAGRDVFTQKDMLAQGMVGSGEIVKKAFDSSGVLLQGKDVFKPGALKEGMVIGVDSGKTAHEHWKGIDHIMMVVRDPKSGELLVSQSTGSKGVNTMPLDDYLATHQNAKLFASDPLAKGRDLLQDRQQSQAQTQGAQEPRTALKPGEQGADVKAMQQRLIELGIKDDQGKLLSGTGYYGDRTKEVVANLQREKGLAATGIADKATLEAIAKQPAPAKADAAALADNPLYKQAMDHLQKQGPNGGFKSAEEMQRAAGQVAFEAKVSGMNRIDDLVLSGDRRGLIAVQRNP…
gi|348022905|gb|AGHY01001924.1|	fig|487527.6.peg.634	peg	gi|348022905|gb|AGHY01001924.1|_979_239	979	239	-	ATP dependent RNA helicase		FIG01210717	ff	ttgctggccggcctgccgacccaggtgggccaccgcaccgagaaaggcgatttcctggcgccgcggcagcgccgcttcctgctgttccccggctcggcgctggcgcgcaagccgccgccgtgggtgctgcctgcgacgctgctggacacgcagaaggtgtggggcctgaccaacgctgcgatcgaaccggattgggtgatcgcggagttgccgcacctgctggcgcgcaagcatttcgatccgcactggtcgcgcgcgcaggggcaggtgctggcctccgagcagatcagcctgttcgggctggtgctggcgccgaaagaagccggtgcactacggccgcatcgatccgcccggtgcgcacgagttgttcgtgcgccagggcctggtgccgggcgagat…	MLAGLPTQVGHRTEKGDFLAPRQRRFLLFPGSALARKPPPWVLPATLLDTQKVWGLTNAAIEPDWVIAELPHLLARKHFDPHWSRAQGQVLASEQISLFGLVLAPKEAGALRPHRSARCARVVRAPGPGAGRDQHPCQLRRRQPEGAGAGTRGRGQAAPRRHRRRRGLAGALVSGPDSRRDPFRLRPGRLVEGAGAGAAAHAALVAGRPAAGRGQRGRALSQVLPGWAMRGCRCSTGSNRARPTTA
gi|348022909|gb|AGHY01001922.1|	fig|487527.6.peg.635	peg	gi|348022909|gb|AGHY01001922.1|_486_283	486	283	-	hypothetical protein				atgtcctcgtccaagacgcctccgtggaagaagccgaatccgcgcggtcagcgcagccagccgttgtcgccttcgcagaaggcggccgcgcgacagcgggccgatgagaacggccgcccgtatccgaacctgatcgacaacatgtgggcggcgcggctgccgcatgcgacgtcctcctcccgttcggacatcgacgcggaataa	MSSSKTPPWKKPNPRGQRSQPLSPSQKAAARQRADENGRPYPNLIDNMWAARLPHATSSSRSDIDAE
gi|348022911|gb|AGHY01001921.1|	fig|487527.6.peg.636	peg	gi|348022911|gb|AGHY01001921.1|_528_740	528	740	+	Peptide methionine sulfoxide reductase MsrB (EC 1.8.4.12)		FIG00380575	isu;Methionine_sulfoxide_reductases isu;Peptide_methionine_sulfoxide_reductase isu;Unknown_carbohydrate_utilization_(_cluster_Ydj_) isu;At5g04520_AT1G06240	gtgcgcgagctgcgcgacaccagctacggcatgatccgcaccgagatcgtctgcgcccgctgcgacagccatctcggccacgtgttcccggacggcccgccgccgagcggcgagcgccactgcctgaattcggtctcgctgcagttcaccgaacagggccaggcgctgcccaacccgctgcaccgcggcggcggcgagaccgaaccggcctga	MRELRDTSYGMIRTEIVCARCDSHLGHVFPDGPPPSGERHCLNSVSLQFTEQGQALPNPLHRGGGETEPA
gi|348022913|gb|AGHY01001920.1|	fig|487527.6.peg.637	peg	gi|348022913|gb|AGHY01001920.1|_1043_756	1043	756	-	ABC transporter ATP-binding protein				gtgcggcgcgcgctcggtgcccgccgcggccacgtgttcctgcagttcggcagcgaggccgcgctgatcggactgctcggtggcgcagtgggcatcgccatcgccgaactgggtctgtggagcgtgcggcagcgcccggacgactacgccaggttggcgcggatggacctgcaaatgctgctcgccaccgtggcactggcggtgatcgccgcactgctggcgggcctgctgcccgcctggcgggccagccggatcgaccccgccctgcagatcaaggacctgacatga	MRRALGARRGHVFLQFGSEAALIGLLGGAVGIAIAELGLWSVRQRPDDYARLARMDLQMLLATVALAVIAALLAGLLPAWRASRIDPALQIKDLT
gi|348022915|gb|AGHY01001919.1|	fig|487527.6.peg.638	peg	gi|348022915|gb|AGHY01001919.1|_29_250	29	250	+	hypothetical protein				atggaggaccaggccgcgcagttgagcgatgcggtggcggtgttccgggtggaacagcaggccgtgcgcagcgccgcacctgcacccagcgccgttgccgcgaccgcgcccagccatgcccccgcaacgaccgccgccgcgcacgcgccgcaggccaatgcccaggccatcgccgacgcgatcggcacgcagtggcaggcgctccaccgcggagggaaatga	MEDQAAQLSDAVAVFRVEQQAVRSAAPAPSAVAATAPSHAPATTAAAHAPQANAQAIADAIGTQWQALHRGGK
gi|348022917|gb|AGHY01001918.1|	fig|487527.6.peg.639	peg	gi|348022917|gb|AGHY01001918.1|_506_967	506	967	+	aldose 1-epimerase				atgtcctcgctcttcggtcatcttcccgacggtactgccatccagcgcgtggtcctggacagcggcgacggcctgcgtgccgaactgctgacctacggtggcctgttgcgcagcctgcgcctacacggcacgcatggcgagaccgacctggtgctggggctgccgacgctgcaggactatctgcaggatccggcctacctgggcgtgctggtcgggcgcttcggcaaccgcatcgctggctcggctttcgccatcgatggccggcactacgcggtcaccgccaacgagggcgccaatcacctgcatggcggcgcgctgggcttcggccgccgggtgtggacggtgctggcgcagaccgcgcgccacgctgcagttgcgctacgactcgccggccggcga…	MSSLFGHLPDGTAIQRVVLDSGDGLRAELLTYGGLLRSLRLHGTHGETDLVLGLPTLQDYLQDPAYLGVLVGRFGNRIAGSAFAIDGRHYAVTANEGANHLHGGALGFGRRVWTVLAQTARHAAVALRLAGRRGGLPGQRRGGGDPTASTAGA
gi|348022919|gb|AGHY01001917.1|	fig|487527.6.peg.640	peg	gi|348022919|gb|AGHY01001917.1|_497_75	497	75	-	Lactoylglutathione lyase (EC 4.4.1.5)		FIG00004743	isu;Glutathione:_Non-redox_reactions isu;Methylglyoxal_Metabolism	atgaaatacctgcacgccatgatccgcgtccacgacctggagaagaccagcaaattcttcaccgaaggcctgggcctgcacgagacccgccgcatcgacaacgaagccggcaagttcaccctggtgtacttcggcgccccggagaacccggaggccgaggtcgagctgacctacaactggggctcggacgaggactacggcagcgcccgcaatttcggccacctggccttcgaggtcgacgatatctacgccctctgcgcgcacctgcagtcgctcggcgtgaccatcaaccggccgccgcgcgatgggcgcatggccttcgtgcgcagccccgacctgatctcgatcgagttgctgcagaagggcgaggcgctggccccggccgaaccgtgggcgtcg…	MKYLHAMIRVHDLEKTSKFFTEGLGLHETRRIDNEAGKFTLVYFGAPENPEAEVELTYNWGSDEDYGSARNFGHLAFEVDDIYALCAHLQSLGVTINRPPRDGRMAFVRSPDLISIELLQKGEALAPAEPWASMPNTGVW
gi|348022927|gb|AGHY01001913.1|	fig|487527.6.peg.641	peg	gi|348022927|gb|AGHY01001913.1|_188_331	188	331	+	TonB family protein				atgctcgatgccgccgcgttgcggatcgtgcaactggcgcagccgttcccgccgctgccgcgcaccgacgacaacatcgacatcctgcaggtcacccgcacctgggtgttcctgcccggcggcagtctggtggacgaccgctga	MLDAAALRIVQLAQPFPPLPRTDDNIDILQVTRTWVFLPGGSLVDDR
gi|348022929|gb|AGHY01001912.1|	fig|487527.6.peg.642	peg	gi|348022929|gb|AGHY01001912.1|_680_1243	680	1243	+	transcriptional regulator, LysR family		FIG01111960	ff	gtgcggctgaccctgcacaacgcgatcagcgccgacggcaccgatctgctgcgcgaggaccgcggggacctggcggtcggctccatgctcgacgtgccggccgacctcagctacgccccggtgtaccgcttcgaacagctgctgatcgccccgcacgaccacccgctggcccgcaagccgacgctggcgctggaagacctgtcgccctacccgctgatcctgccgccgcggcgccaggtcacctaccgcctggtcgacctggtgttccagcaggcgcgcgtgccctacaccgtcgccctggaagtgggcggctgggaggtgatcaagcagtacgtggcgatgggcatgggcgtgtccatcgtcagttcgatctgcctcaccgacgccgaccgcgcgcgc…	MRLTLHNAISADGTDLLREDRGDLAVGSMLDVPADLSYAPVYRFEQLLIAPHDHPLARKPTLALEDLSPYPLILPPRRQVTYRLVDLVFQQARVPYTVALEVGGWEVIKQYVAMGMGVSIVSSICLTDADRARLATRALGDYFPARSYGVVVRKGKYLSPQARAFIELIQPDLFTPRGYDESGPSER
gi|348022931|gb|AGHY01001911.1|	fig|487527.6.peg.643	peg	gi|348022931|gb|AGHY01001911.1|_797_255	797	255	-	Tryptophan synthase beta chain (EC 4.2.1.20)		FIG00116323	idu(1);Chorismate:_Intermediate_for_synthesis_of_Tryptophan,_PAPA_antibiotics,_PABA,_3-hydroxyanthranilate_and_more. idu(1);Tryptophan_synthesis	atgcctatcccgacgccgccggccatttcgggccgctacggcggccgtttcgtcgccgagaccctgatcggcccgctgcaggaactggccgccgcctacgacgccgcgcgccaggatccggccttcatcgccgcctacgacaaggacctgacccactacgtcggccggcccagcccgatctaccacgccgagcggctcagccgccgaagtcggcggcgcgcagatcctgctcaagcgcgaggacctgaaccacaccggcgcgcacaagatcaacaacaccctcggccaggcgctgctggccagccgcatgggcaagacccgcatcatcgccgagaccggcgcgggccagcacggcgtggccagcgccaccgtggccgcgcggctgggcctggagtgcgt…	MPIPTPPAISGRYGGRFVAETLIGPLQELAAAYDAARQDPAFIAAYDKDLTHYVGRPSPIYHAERLSRRSRRRADPAQARGPEPHRRAQDQQHPRPGAAGQPHGQDPHHRRDRRGPARRGQRHRGRAAGPGVRGVHGRHRHRAAEDQRLPDEAARRHGGAGALRLGHAQGRRSTRRCATG
gi|348022933|gb|AGHY01001910.1|	fig|487527.6.peg.644	peg	gi|348022933|gb|AGHY01001910.1|_82_567	82	567	+	hypothetical protein				atgcaagacgcggcccagacccagaccgtggatctgctgatctcccacagccaggtgcagttgcgcgcccgcgacttcgacgaggccgcctgccgctggaggccgcgcaacctggagcagggggcgatcctgcaccgcgactacgtggtgttcgctccgctgcccgaggacgcgttcggcgcgcaggtgcacgtggtactggccacggcgttcgcgcccgacccgcgcgcgcagcggcgcatgcaggtgccattccgggtgaatccaaacgcgcgggtgcagctggcgtccgccgccgaggccttcgatgtgaccttgccgctgcagcccggcgactacgcgctgtactacgaggtctgcgaaggcgacgaggtgtattgccggctcaccctggtaccg…	MQDAAQTQTVDLLISHSQVQLRARDFDEAACRWRPRNLEQGAILHRDYVVFAPLPEDAFGAQVHVVLATAFAPDPRAQRRMQVPFRVNPNARVQLASAAEAFDVTLPLQPGDYALYYEVCEGDEVYCRLTLVPAAQPVAARYLLDDPWGGAQDAPLQDGML
gi|348022933|gb|AGHY01001910.1|	fig|487527.6.peg.645	peg	gi|348022933|gb|AGHY01001910.1|_1120_800	1120	800	-	hypothetical protein				atgaaccgcatcgttcctcgtctcgtcccgttcgcgtttgcgctgcttgccgcgccggcgctggccatggcgcagtcggcgccggacgaagtgaccctgcaccagaacggccagatcatcaatgtcacctcggtcgaaccgaactcgatcgtcggcgactaccacatcgatttcgccaagctcgaccgcaaccatgacggctacatcagccgcgccgaggccaaggccgatcccacgctgtacgccgaattcgatgccgtcgacgtgcatcaccacggccgcctgagcaaggccgacctggaaggctggatgtcgacgtga	MNRIVPRLVPFAFALLAAPALAMAQSAPDEVTLHQNGQIINVTSVEPNSIVGDYHIDFAKLDRNHDGYISRAEAKADPTLYAEFDAVDVHHHGRLSKADLEGWMST
gi|348022935|gb|AGHY01001909.1|	fig|487527.6.peg.646	peg	gi|348022935|gb|AGHY01001909.1|_277_417	277	417	+	hypothetical protein				atggcgccggtgcccttcaccatccagacccgcgccgacctgtgcagcgagcgcatgaccgcggccctggcgcgggccggttgccggcgaggcctggatcggcgccgagagcggcagccagcggcatcctcgacaagatga	MAPVPFTIQTRADLCSERMTAALARAGCRRGLDRRRERQPAASSTR
gi|348022937|gb|AGHY01001908.1|	fig|487527.6.peg.647	peg	gi|348022937|gb|AGHY01001908.1|_537_1325	537	1325	+	putative salt-induced outer membrane protein				ttgctgctgagcacgtccccggcctgggccgccgacgtcgccacctcgtcggcaaccacggacccggccagttcgccgtggagcggatcgggcgaactcggcttcgcctcctcgcacggcaacagcaccaacgaaagcctcaacggccggctcaagggccagtacgtggacggcgactggatccacagcctggacctgctcgccctgcacgccagcgccgagtacaccgacaccaatccggacggcaccaccacgcgcaagcgccagaccacctccaaccgctacaccggcagcgccggcagcgcgctgcagctcggcgaacaccgccagctgaccgcctcgctgcgctacgagcgcgacgacttcgccacctacgaccgcctggccacgatcggcatc…	MLLSTSPAWAADVATSSATTDPASSPWSGSGELGFASSHGNSTNESLNGRLKGQYVDGDWIHSLDLLALHASAEYTDTNPDGTTTRKRQTTSNRYTGSAGSALQLGEHRQLTASLRYERDDFATYDRLATIGIGYGTRIMDGDRRSIDVQIGPGVRRAHDVVEDRTETGPDRPRPGRLQVRPDQQHRTGQHPAGRIRRIQHLRAERPGHLGEHERAPGAEGRLAGALQQRRQRRQEEDRYLDHHEPGLQVQVSGDLEVGIRD
gi|348022943|gb|AGHY01001905.1|	fig|487527.6.peg.648	peg	gi|348022943|gb|AGHY01001905.1|_883_725	883	725	-	3-deoxy-D-manno-octulosonic-acid kinase				gtgctgcgcattcccgccacccgctggcgcgagcgcaacctcaagcggctgcgtcgttcgctgctgaagctgcgcggcgagcgcagcgtcgatgcggtggagaaggattacgcgcgcctgcgccgtgcctacgacctggcctgggagcgcggctgctga	MLRIPATRWRERNLKRLRRSLLKLRGERSVDAVEKDYARLRRAYDLAWERGC
gi|348022947|gb|AGHY01001903.1|	fig|487527.6.peg.649	peg	gi|348022947|gb|AGHY01001903.1|_1084_110	1084	110	-	Sulfate and thiosulfate binding protein CysP			isu;Cysteine_Biosynthesis	ttgtgcgcgttcgccggggccgcggccgccgccgagacgcaactgctcaacgtgtcctacgatcccacccgcgagctttaccgcgactacaacgccgccttcgccaagcactgggcgcaactgcatcccggcgagcaggtgacggtggagacctcgcacggcggttccggcaagcaggcgcgcgcggtgatcgacggggtcgaggctgacgtggtgacactggcgctggcctacgacgtcgacgcgatcgccgccaagagcaagctgatcgatgcgaactgggccacgcgcctgcccgacaacagcgcgccctacacctcgaccatcgtgttcctggtgcgcaagggcaatccgaaaggcatcaaggactggcccgacctgctgcgcagcggcgtgtcg…	MCAFAGAAAAAETQLLNVSYDPTRELYRDYNAAFAKHWAQLHPGEQVTVETSHGGSGKQARAVIDGVEADVVTLALAYDVDAIAAKSKLIDANWATRLPDNSAPYTSTIVFLVRKGNPKGIKDWPDLLRSGVSVITPNPKTSGGARWNYLAAWAYADHIFKGDRERILNYMRALFRNVPVLDTGARGATTTFVQRGIGDVLLAWENEAFLAQQELGQDKFEIVVPKLSILAEPSVALVDKNVDKHGTRAVAEEYLKYLYSPEGQKIAARHYYRPRHPEYADRADLARLPKVRLVTIEQAFGSWAKAQATHFDDGGLFDQIQASK
gi|348022959|gb|AGHY01001897.1|	fig|487527.6.peg.650	peg	gi|348022959|gb|AGHY01001897.1|_499_149	499	149	-	2-keto-4-pentenoate hydratase (EC 4.2.1.-)			isu;Biphenyl_Degradation	gtgcaggacctggcgatcgcgcaatggccggaccgcgtggtcggctggaaggtcggctacatcgcgcccgagcgccgcgaccactccggcgacgagcgcctgctgggcccgatcttcgctgctgcgctatggaatgctaccggtggaacagccgacatcccggtgttcgacggcggcttcggcgcggtcgaggccgagtacgtgctgcgcctggaccgcggacgtgcccgccgaccagttgcactggactccgcagcaggccgcccaggtgccggcgacgctgctcgtcggggtcgagggtggcgagcagcccgctggccacgatcaaccagttgggaccgcgcgtggtga	MQDLAIAQWPDRVVGWKVGYIAPERRDHSGDERLLGPIFAAALWNATGGTADIPVFDGGFGAVEAEYVLRLDRGRARRPVALDSAAGRPGAGDAARRGRGWRAARWPRSTSWDRAW
gi|348022963|gb|AGHY01001895.1|	fig|487527.6.peg.651	peg	gi|348022963|gb|AGHY01001895.1|_4_117	4	117	+	hypothetical protein				ttggcggcactgggcctgccggatgtgcagatccgcaccgcggtgcgcaccggcggatacgccgcagcgcgagcgcgcgccaggcgcggcggcgtccgccgcacgtgctggtga	MAALGLPDVQIRTAVRTGGYAAARARARRGGVRRTCW
gi|348022963|gb|AGHY01001895.1|	fig|487527.6.peg.652	peg	gi|348022963|gb|AGHY01001895.1|_139_432	139	432	+	hypothetical protein				gtgctgctcggctcggtgtccgggcgcgagacgctgcgccatgtgcgcacggtgatcgtcgacgagatccatgcgctggcggccaacaagcgcggcagccatctggcgctgtcgctgcagcgccctgcagcatctgtgcggagtgccgccgctgcgcatcggcctgtcggcgacgcagaagccgatcgatgcggctcgcgcgctttctggtgggcagcgcggcggtgcacgacggcgaggcggactgcgccatcgtcgacatcggctatgcgcgcgcccgcgacctggcgctga	MLLGSVSGRETLRHVRTVIVDEIHALAANKRGSHLALSLQRPAASVRSAAAAHRPVGDAEADRCGSRAFWWAARRCTTARRTAPSSTSAMRAPATWR
gi|348022967|gb|AGHY01001893.1|	fig|487527.6.peg.653	peg	gi|348022967|gb|AGHY01001893.1|_28_606	28	606	+	hypothetical protein				gtgagcccgtacttcatcgaaggcgggcacgtggagtgggacgtgtacgccggctacgcggccagccacggcgactggggctggcgcgccggcctgtaccactacgcctatcccggcgcgcggatgaacgccagcggcacccgctacgactatggcgaggcgatcgtcgccgggcactggcgcacgctggagctgtcctacgccagtacctggacgcgcgactacttcggctacaacagcgccacgctgggcgtcggccggggccggcactcgcgtggctccggctatctggccctggacgccacgctgccgctggcctcggactggcaggcgagcgtgcatgccggccaccagcacgtgcgcaacttcgccgactacggttggaccgacgcgcgcgtg…	MSPYFIEGGHVEWDVYAGYAASHGDWGWRAGLYHYAYPGARMNASGTRYDYGEAIVAGHWRTLELSYASTWTRDYFGYNSATLGVGRGRHSRGSGYLALDATLPLASDWQASVHAGHQHVRNFADYGWTDARVGLSRTWRGTEFGLSYARAWNSAGVYRRYTTGVADGEGRVHVSNPIDGAWSFTIKRNFSL
gi|348022967|gb|AGHY01001893.1|	fig|487527.6.peg.654	peg	gi|348022967|gb|AGHY01001893.1|_1323_619	1323	619	-	FIG01212366: hypothetical protein		FIG01212363	ff	atgagcctgcgcgtcatcggcgccggcctgggccgcaccggcaccctgtcgctgaaactggcgctggaacatctgggcctgggccgttgctaccacgccatggagctggccgcgaacctgcgccagtccttgccgcagtgggacgcggcgatcgacgggcaggcggactgggagacgctgttcgccggctacaccgccaccgtcgactatcccggctgctgcttctggcgcgagctggtcgcgcgctacccgcaggccaaggtgatcctgaccgtgcgcgatgccgatgcctggttcgattcggtacgcagcaccatcttcgccagcgacggcagcgtaccggccttgttcggcaccgatggccaacgcctgagccagttcctgcgcggcgagttcgcc…	MSLRVIGAGLGRTGTLSLKLALEHLGLGRCYHAMELAANLRQSLPQWDAAIDGQADWETLFAGYTATVDYPGCCFWRELVARYPQAKVILTVRDADAWFDSVRSTIFASDGSVPALFGTDGQRLSQFLRGEFATRIDDRDFMTDYFHRWNQAVIANVPAHRLLVLDTDAQTGWESLCAFLDVPVPAQPYPRVHARGSGGAQARPLPSDPAQREQRLRAYLDRLAVEAFAPPADG
gi|348022969|gb|AGHY01001892.1|	fig|487527.6.peg.655	peg	gi|348022969|gb|AGHY01001892.1|_506_36	506	36	-	Maleylacetoacetate isomerase (EC 5.2.1.2) @ Glutathione S-transferase, zeta (EC 2.5.1.18)		FIG00004671	isu;Gentisare_degradation isu;Homogentisate_pathway_of_aromatic_compound_degradation isu;Pterin_carbinolamine_dehydratase isu;Glutathione:_Non-redox_reactions isu;Salicylate_and_gentisate_catabolism	atgacggtcagccgatccgccagtcgctggcgatcctggagtacctggacgagcgctggccggagccgccgctgctgccggaacgcgccgatcgatcgcgcccgcgtgcgtggcctggcgcaactgatcgcctgcgacatccatccgctcaacaacctgcgcgtggcgcagttcttcgagagcgcctggaacgtaccgcagcccgagcgcgaggagtggatgcggcactggatgcaggtcggcttcgatgcgctggagcaactgctggccgaatcgccggacaccggcagtttctgccatggcgagcagcccgggctggccgactgctgcctggtgccgcagatgtacaacgcgcgccgcttcggcgtggacctgcaggtctacccgaccctggagcgg…	MTVSRSASRWRSWSTWTSAGRSRRCCRNAPIDRARVRGLAQLIACDIHPLNNLRVAQFFESAWNVPQPEREEWMRHWMQVGFDALEQLLAESPDTGSFCHGEQPGLADCCLVPQMYNARRFGVDLQVYPTLERIERACLALPAFDAARPENQPDAQ
gi|348022971|gb|AGHY01001891.1|	fig|487527.6.peg.656	peg	gi|348022971|gb|AGHY01001891.1|_583_149	583	149	-	Glutathione peroxidase (EC 1.11.1.9)		FIG00021745	idu(3);Glutathione:_Redox_cycle	gtgcggcctcaccgcgcagtacgcgggcctggaagcgctgtacgcgagaagcaggcggccggcctggaagtgctcggtttcccggccaacgatttcaagggccaggagccgggcagcgaggcggagatccagcagttctgccagctcacctacgacgtgaccttcccgatgttctccaagatcgcggtcaccggcgaggccacgcatccgctgtaccgcgcgctgatcgccgcgcagccgcacaccgagggcgagggcccgatgcgcgagaagctggccggctacggcatcgagccgaatccggcgccgggggtgctgtggaatttcgagaagttcctggttggccgcgacggcaaggtccacgggcgtttcgccccggacgtcaccgccgaagatccg…	MRPHRAVRGPGSAVREKQAAGLEVLGFPANDFKGQEPGSEAEIQQFCQLTYDVTFPMFSKIAVTGEATHPLYRALIAAQPHTEGEGPMREKLAGYGIEPNPAPGVLWNFEKFLVGRDGKVHGRFAPDVTAEDPRLRASIDAALG
gi|348022971|gb|AGHY01001891.1|	fig|487527.6.peg.657	peg	gi|348022971|gb|AGHY01001891.1|_596_727	596	727	+	hypothetical protein				ttgacgatcagcaacaccttgccctcgaacgcggcgagggtggtcggctcgccgtcgatgcgggtcagcggaatggcggtcagcgactcggacatggggcattacctcggtcgaaaggaagcgccagcatag	MTISNTLPSNAARVVGSPSMRVSGMAVSDSDMGHYLGRKEAPA
gi|348022981|gb|AGHY01001886.1|	fig|487527.6.peg.658	peg	gi|348022981|gb|AGHY01001886.1|_5_124	5	124	+	Magnesium and cobalt transport protein		FIG01211249	ff	atgatcaacgtcgaccagaacaacgtgatgaaggtgatggcggtggcctcggtggtgggcatcccgccgacggtgctggtcggcatctggggcatgaacttcgcgcacatcccgagctga	MINVDQNNVMKVMAVASVVGIPPTVLVGIWGMNFAHIPS
gi|348022981|gb|AGHY01001886.1|	fig|487527.6.peg.659	peg	gi|348022981|gb|AGHY01001886.1|_126_308	126	308	+	hypothetical protein				atggcacgacgcctactactgggcgctgggcgtgatcgcgctgagcatgctgttgccgctggcctggttccgccggcgcggctgggtctgagccactgcgcgcggcgccggccgcgcaggatcacgccgcgaggctgtcggcctgtgctgcggcgtccgccgcgtcgtgctcttcgccgctga	MARRLLLGAGRDRAEHAVAAGLVPPARLGLSHCARRRPRRITPRGCRPVLRRPPRRALRR
gi|348022987|gb|AGHY01001883.1|	fig|487527.6.peg.660	peg	gi|348022987|gb|AGHY01001883.1|_33_278	33	278	+	hypothetical protein				gtgtcgatcttccgcgtcgagcagtcggcccagtccgcggtggtgcatgcaccgcaggccgtggccgcgccgaagccggcactggtggcgaagaagccgacggccgtcgcctccgccaagccggcggcggtgcgcgcccgcaaggtcgaacccgcgctggccgattccgactggcaggaggttctgagcccggcccggcctgtcgctacaccccctccccggccttcgcgccggggatttttttga	MSIFRVEQSAQSAVVHAPQAVAAPKPALVAKKPTAVASAKPAAVRARKVEPALADSDWQEVLSPARPVATPPPRPSRRGFF
gi|348022989|gb|AGHY01001882.1|	fig|487527.6.peg.661	peg	gi|348022989|gb|AGHY01001882.1|_404_207	404	207	-	FIG01211600: hypothetical protein		FIG01211599	ff	atgagccataccgccaccgcgcccgccaatgcccagacgcgctacgaggtgcgccgcgccgacctgccgctgagctgcccgacgccggagatggcgctgtggaattcgcacccgcgggtctacctgccgatcgaggacgagcccggcctcgaagccaagtgcccctactgcggcgcggtcttcgtgctggtcgactga	MSHTATAPANAQTRYEVRRADLPLSCPTPEMALWNSHPRVYLPIEDEPGLEAKCPYCGAVFVLVD
[truncated: 2,782 more rows]
